# Supplementary material
Source: Research Square preprint supplement (doi:10.21203/rs.3.rs-9109145/v1)
Supplement: Supplementary file 1 [file 1a759f57e6b4e02b4cc05878.xlsx]

## Sheet: File contents
Supplementary datasheet 1: As-AOM batches
Table S1	Methanoperedenaceae MAGs used in genomic analysis
Table S2	Methanoperedens-ArrA/ArxA blastp analysis results
Table S3	Properties and relative metagenome and metatranscriptome abundances for the dominant MAGs in the bioreactor
Table S4	Gene expression analysis of Methanoperedens population
Table S5	Relative expression of metabolic pathways for abundant populations in the bioreactor
Table S6	ArrA and ArxA proteins used in protein phylogenetic analysis
Table S7	ArrA and ArxA proteins and genome accessions used to generate supplementary figure 1
Table S8	Functional annotation of Arr and Arx gene clusters (5kb regions) used in supplementary figure 1

## Sheet: S1 - ANME2d MAGs
MAGS used
Bin_ID	Other Names	Genbank_Accession	Associated publication	Isolation source	GTDB_classification	Completeness	Contamination	ArrA	ArrB	ArxA	ArxB
BE2012_43_12		GCA_020724545.1	https://doi.org/10.1101/2020.03.07.980714	Borehole 1,339 m below land surface, Beatrix gold mine Welkom, South Africa	d__Archaea;p__Halobacteriota;c__Methanosarcinia;o__Methanosarcinales;f__Methanoperedenaceae;g__Methanoperedens;s__Methanoperedens nitroreducens_B	99.96	5.44	Y	Y	Y	Y
Mnitro_retentate	Methanoperedens nitroreducens	GCF_000685155.1	10.1038/nature12375	Nitrate AOM reactors University of Queensland	d__Archaea; p__Halobacteriota; c__Methanosarcinia; o__Methanosarcinales; f__Methanoperedenaceae; g__Methanoperedens; s__Methanoperedens nitroreducens	99.8	3.4	Y	Y	Y	Y
ASW-1		NA	https://doi.org/10.1128/mbio.01325-20	Bangladesh Surface and Ground Water Metagenomes	d__Archaea;p__Halobacteriota;c__Methanosarcinia;o__Methanosarcinales;f__Methanoperedenaceae;g__;s__	76.76	0.62			Y	Y
ASW-3		GCA_013331375.1	https://doi.org/10.1128/mbio.01325-20	Bangladesh Surface and Ground Water Metagenomes	d__Archaea; p__Halobacteriota; c__Methanosarcinia; o__Methanosarcinales; f__Methanoperedenaceae; g__UBA10536; s__UBA10536 sp10536u	96.88	1.33			Y	Y
ASW-4		NA	https://doi.org/10.1128/mbio.01325-20	Bangladesh Surface and Ground Water Metagenomes	d__Archaea;p__Halobacteriota;c__Methanosarcinia;o__Methanosarcinales;f__Methanoperedenaceae;g__Methanoperedens;s__	95.99	0.8			Y	Y
BLZ2		GCF_002487355.1	10.3389/fmicb.2015.01423	Nitrate AOM reactor Netherlands	d__Archaea; p__Halobacteriota; c__Methanosarcinia; o__Methanosarcinales; f__Methanoperedenaceae; g__Methanoperedens; s__Methanoperedens sp002487355	99.99	2.33			Y	Y
E14		GCA_030650845.1	NA	Canadian groundwater	d__Archaea; p__Halobacteriota; c__Methanosarcinia; o__Methanosarcinales; f__Methanoperedenaceae; g__Methanoperedens; s__Methanoperedens sp030650845	97.58	4.85			Y	Y
Mnv1		GCA_900196725.1		Paddy field soil, Netherlands	d__Archaea; p__Halobacteriota; c__Methanosarcinia; o__Methanosarcinales; f__Methanoperedenaceae; g__Methanoperedens; s__Methanoperedens nitroreducens_A	100	5.18			Y	Y
nzgw24		GCA_023249105.1	10.1128/msystems.01255-21	Groundwater samples	d__Archaea; p__Halobacteriota; c__Methanosarcinia; o__Methanosarcinales; f__Methanoperedenaceae; g__Methanoperedens; s__Methanoperedens sp023249105	99.71	1.39			Y	Y
RU-BES		GCA_905339155.1	10.3389/fmicb.2022.820989	A stable coculture containing anammox and N-damo microorganisms in a laboratory scale sequencing batch reactor was suplied with oxygen.	d__Archaea; p__Halobacteriota; c__Methanosarcinia; o__Methanosarcinales; f__Methanoperedenaceae; g__Methanoperedens; s__Methanoperedens sp905339155	98.57	7.08			Y	Y
SO_2017_SWC_14		GCA_041648475.1	PRJNA823399	Canadian Landfill	d__Archaea; p__Halobacteriota; c__Methanosarcinia; o__Methanosarcinales; f__Methanoperedenaceae; g__Methanoperedens; s__Methanoperedens sp041648475	99.9	4.04			Y	Y
Kmv03		GCA_014859785.1	https://doi.org/10.3390/microorganisms8091333	Terrestrial Mud Volcano, Crimean Peninsula	d__Archaea; p__Halobacteriota; c__Methanosarcinia; o__Methanosarcinales; f__Methanoperedenaceae; g__Methanoperedens_A; s__Methanoperedens_A sp014859785	95.74	0.27	Y	Y
ASW-2		NA	https://doi.org/10.1128/mbio.01325-20	Bangladesh Surface and Ground Water Metagenomes	d__Archaea;p__Halobacteriota;c__Methanosarcinia;o__Methanosarcinales;f__Methanoperedenaceae;g__Methanoperedens;s__	99.33	10.02
ASW-5		NA	https://doi.org/10.1128/mbio.01325-20	Bangladesh Surface and Ground Water Metagenomes	d__Archaea;p__Halobacteriota;c__Methanosarcinia;o__Methanosarcinales;f__Methanoperedenaceae;g__Methanoperedens;s__	97.83	5.18
ASW-6		NA	https://doi.org/10.1128/mbio.01325-20	Bangladesh Surface and Ground Water Metagenomes	d__Archaea;p__Halobacteriota;c__Methanosarcinia;o__Methanosarcinales;f__Methanoperedenaceae;g__Methanoperedens;s__	97.14	2.79
BJP_1		GCA_026552815.1	https://www.nature.com/articles/s41467-022-34588-9	Japanese Mizunami Underground Reseach Laboratory: borehole water	d__Archaea; p__Halobacteriota; c__Methanosarcinia; o__Methanosarcinales; f__Methanoperedenaceae; g__Methanoperedens_A; s__Methanoperedens_A sp002839545	91.6	0.56
CMD-1		NA	10.1111/mec.14294	Copper mine tailings dam, Brazil	d__Archaea;p__Halobacteriota;c__Methanosarcinia;o__Methanosarcinales;f__Methanoperedenaceae;g__Methanoperedens;s__	94.57	1.76
CMD-2		NA	10.1111/mec.14294	Copper mine tailings dam, Brazil	d__Archaea;p__Halobacteriota;c__Methanosarcinia;o__Methanosarcinales;f__Methanoperedenaceae;g__Methanoperedens;s__	82.9	0.06
Fe_173	Methanoperedens psychrophilus	GCA_021409285.1	10.1111/1462-2920.15848	Cold Zoige wetland,3400–3600 m above sea level, Tibetan Plateau	d__Archaea; p__Halobacteriota; c__Methanosarcinia; o__Methanosarcinales; f__Methanoperedenaceae; g__Methanoperedens; s__Methanoperedens sp021409285	96.96	1.57
Ig_1		GCA_026552975.1	NA	Borehole water, Japan	d__Archaea; p__Halobacteriota; c__Methanosarcinia; o__Methanosarcinales; f__Methanoperedenaceae; g__Methanoperedens; s__Methanoperedens sp026552975	93.4	1.76
KB-1	3300013123_18	NA	10.1038/s41587-020-0718-6	Lake Kivu, Kabuno Bay	d__Archaea;p__Halobacteriota;c__Methanosarcinia;o__Methanosarcinales;f__Methanoperedenaceae;g__Methanoperedens;s__	99.97	7.02
KB-2	3300013123_32	NA	10.1038/s41587-020-0718-6	Lake Kivu, Kabuno Bay	d__Archaea;p__Halobacteriota;c__Methanosarcinia;o__Methanosarcinales;f__Methanoperedenaceae;g__Methanoperedens;s__	93.19	3.39
KR11_0.1		GCA_018900975.1		Groundwater from deep terrestrial boreholes, Finland	d__Archaea; p__Halobacteriota; c__Methanosarcinia; o__Methanosarcinales; f__Methanoperedenaceae; g__Methanoperedens; s__Methanoperedens sp018900975	87.02	4.58
KR11_N3		GCA_018899795.1		Groundwater from deep terrestrial boreholes, Finland	d__Archaea;p__Halobacteriota;c__Methanosarcinia;o__Methanosarcinales;f__Methanoperedenaceae;g__Methanoperedens;s__Methanoperedens	91.32	9.67
LC_1		GCA_026552855.1	10.1038/s41467-022-34588-9	mercury mine wastewater	d__Archaea; p__Halobacteriota; c__Methanosarcinia; o__Methanosarcinales; f__Methanoperedenaceae; g__Methanoperedens; s__Methanoperedens sp026552855	99.85	6.49
LFW-24		GCA_902384525.1	10.3389/fmicb.2021.732575	Radioactive legacy site	d__Archaea; p__Halobacteriota; c__Methanosarcinia; o__Methanosarcinales; f__Methanoperedenaceae; g__Methanoperedens; s__Methanoperedens sp902384525	96.99	1.46
LFW-280_1_1		GCA_902386085.1	10.3389/fmicb.2021.732575	Radioactive legacy site	d__Archaea; p__Halobacteriota; c__Methanosarcinia; o__Methanosarcinales; f__Methanoperedenaceae; g__Methanoperedens; s__Methanoperedens sp902386085	63.67	2.42
LFW-280_2_2		GCA_902386115.1	10.3389/fmicb.2021.732575	Radioactive legacy site	d__Archaea; p__Halobacteriota; c__Methanosarcinia; o__Methanosarcinales; f__Methanoperedenaceae; g__Methanoperedens; s__Methanoperedens sp902386115	74.31	4.77
LFW-280_3_1		GCA_902386135.1	10.3389/fmicb.2021.732575	Radioactive legacy site	d__Archaea; p__Halobacteriota; c__Methanosarcinia; o__Methanosarcinales; f__Methanoperedenaceae; g__Methanoperedens; s__Methanoperedens sp902386135	98.81	2.45
LFW-280_3_2		GCA_902386205.1	10.3389/fmicb.2021.732575	Radioactive legacy site	d__Archaea; p__Halobacteriota; c__Methanosarcinia; o__Methanosarcinales; f__Methanoperedenaceae; g__Methanoperedens; s__Methanoperedens sp902386135	96.37	2.92
LFW-280_4		GCA_902386255.1	10.3389/fmicb.2021.732575	Radioactive legacy site	d__Archaea; p__Halobacteriota; c__Methanosarcinia; o__Methanosarcinales; f__Methanoperedenaceae; g__Methanoperedens; s__Methanoperedens sp902386255	96.33	1.56
M.ferri	Methanoperedens ferrireducens	GCA_003104905.1	10.1038/s41396-018-0109-x	Fe/Mn AOM reactors established from Gold Creek, Australia	d__Archaea; p__Halobacteriota; c__Methanosarcinia; o__Methanosarcinales; f__Methanoperedenaceae; g__Methanoperedens; s__Methanoperedens sp003104905	98.59	3.36
Mn-1	Methanoperedens manganireducens	GCA_012026795.1	https://doi.org/10.1038/s41396-020-0590-x	Fe/Mn AOM reactors established from Gold Creek, Australia	d__Archaea; p__Halobacteriota; c__Methanosarcinia; o__Methanosarcinales; f__Methanoperedenaceae; g__Methanoperedens; s__Methanoperedens sp012026795	99.99	2.23
Mn-2	Methanoperedens manganicus	GCA_012026835.1	https://doi.org/10.1038/s41396-020-0590-x	Fe/Mn AOM reactors established from Gold Creek, Australia	d__Archaea; p__Halobacteriota; c__Methanosarcinia; o__Methanosarcinales; f__Methanoperedenaceae; g__Methanoperedens; s__Methanoperedens sp012026835	99.75	1.18
N1_45		GCA_022013355.1		Groundwater microbial communities, Okiluoto Finland	d__Archaea;p__Halobacteriota;c__Methanosarcinia;o__Methanosarcinales;f__Methanoperedenaceae;g__Methanoperedens;s__Methanoperedens	81.53	9.4
nzgw23		GCA_023249275.1	10.1128/msystems.01255-21	Groundwater samples	d__Archaea; p__Halobacteriota; c__Methanosarcinia; o__Methanosarcinales; f__Methanoperedenaceae; g__Methanoperedens; s__Methanoperedens sp023249275	96.33	2.19
OWC_0015		GCA_028679855.1		Old woman creek wetland sediment	d__Archaea; p__Halobacteriota; c__Methanosarcinia; o__Methanosarcinales; f__Methanoperedenaceae; g__Methanoperedens; s__Methanoperedens sp028679855	77.37	1.08
RBG_1		GCA_026552955.1	10.1038/s41467-022-34588-9	Rifle Sediment, California, US	d__Archaea;p__Halobacteriota;c__Methanosarcinia;o__Methanosarcinales;f__Methanoperedenaceae;g__Methanoperedens;s__	95.01	1.2
RifSed_csp2		GCA_027460465.1	10.1038/s41467-022-34588-9	Rifle Sediment	d__Archaea;p__Halobacteriota;c__Methanosarcinia;o__Methanosarcinales;f__Methanoperedenaceae;g__Methanoperedens;s__	100	2.68
SR-VP_0		GCA_027460585.1	10.1038/s41467-022-34588-9	Vernal pool, California, US	d__Archaea; p__Halobacteriota; c__Methanosarcinia; o__Methanosarcinales; f__Methanoperedenaceae; g__Methanoperedens; s__Methanoperedens sp027460585	84.01	4.14
SR-VP_26_1		GCA_027460495.1	10.1038/s41467-022-34588-9	Vernal pool, California, US	d__Archaea; p__Halobacteriota; c__Methanosarcinia; o__Methanosarcinales; f__Methanoperedenaceae; g__Methanoperedens; s__Methanoperedens sp027460535	99.95	1.83
SR-VP_26_2		GCA_027460615.1	10.1038/s41467-022-34588-9	Vernal pool, California, US	d__Archaea; p__Halobacteriota; c__Methanosarcinia; o__Methanosarcinales; f__Methanoperedenaceae; g__Methanoperedens; s__Methanoperedens sp027460615	81.89	5.13
SR-VP_26_3		GCA_027460525.1	10.1038/s41467-022-34588-9	Vernal pool, California, US	d__Archaea; p__Halobacteriota; c__Methanosarcinia; o__Methanosarcinales; f__Methanoperedenaceae; g__Methanoperedens; s__Methanoperedens sp027460525	99.47	0.9
SRVP18_1		GCA_027460605.1	10.1038/s41467-022-34588-9	Vernal pool, California, US	d__Archaea; p__Halobacteriota; c__Methanosarcinia; o__Methanosarcinales; f__Methanoperedenaceae; g__Methanoperedens; s__Methanoperedens sp027460605	83.85	3.86
SRVP18_2		GCA_027460565.1	10.1038/s41467-022-34588-9	Vernal pool, California, US	d__Archaea;p__Halobacteriota;c__Methanosarcinia;o__Methanosarcinales;f__Methanoperedenaceae;g__Methanoperedens;s__	93.76	9.83
STD1_19		GCA_028717345.1	https://doi.org/10.1101/2023.01.20.524919	Canadian Landfill	d__Archaea; p__Halobacteriota; c__Methanosarcinia; o__Methanosarcinales; f__Methanoperedenaceae; g__Methanoperedens; s__Methanoperedens sp028717345	95.9	2.88
STD1_6		GCA_028715885.1	https://doi.org/10.1101/2023.01.20.524919	Canadian Landfill	d__Archaea; p__Halobacteriota; c__Methanosarcinia; o__Methanosarcinales; f__Methanoperedenaceae; g__Methanoperedens; s__Methanoperedens sp028715885	95.33	1.32
SMAG_U7350		GCA_036567605.1	10.1038/s41467-023-43000-z	Soil metagenome	d__Archaea; p__Halobacteriota; c__Methanosarcinia; o__Methanosarcinales; f__Methanoperedenaceae; g__Methanoperedens; s__Methanoperedens sp036567605	97.95	4.06
bin_184		GCA_033854095.1		Paddy soil	d__Archaea; p__Halobacteriota; c__Methanosarcinia; o__Methanosarcinales; f__Methanoperedenaceae; g__Methanoperedens; s__Methanoperedens sp033854095	81.61	3.25
clean1623		GCA_027371625.1	10.1038/s41597-022-01866-6	Acid mine drainage, China	d__Archaea; p__Halobacteriota; c__Methanosarcinia; o__Methanosarcinales; f__Methanoperedenaceae; g__Methanoperedens; s__Methanoperedens sp027371625	68.75	1.45
OBJ2_061818_130_10		GCA_041494705.1	https://doi.org/10.1128/msystems.00314-24	Slate River riparian floodplain sediment	d__Archaea; p__Halobacteriota; c__Methanosarcinia; o__Methanosarcinales; f__Methanoperedenaceae; g__Methanoperedens; s__Methanoperedens sp041494705	99.53	0.17

## Sheet: S2 - ArrArx blastp analysis 
Diamond Blastp
Query	Subject	GTDB_Taxonomy	Percent Identity	Length	Mismatch	Gapopen	Query start	Query End	Subject Start	Subject End	Evalue	Bitscore
ArrA_Kmv03	GB_GCA_020351185.1~CP070729.1_1098	d__Bacteria; p__Chloroflexota; c__Dehalococcoidia; o__Dehalococcoidales; f__G020351185; g__G020351185; s__G020351185 sp020351185	76.5	841	193	3	13	851	27	864	0	1366
ArrA_Kmv03	GB_GCA_019429385.1~JAHYIS010000003.1_73	d__Archaea; p__Halobacteriota; c__Methanosarcinia; o__Methanosarcinales; f__Methanocomedenaceae; g__QBUR01; s__QBUR01 sp019429385	76.1	842	198	1	13	851	3	844	0	1372
ArrA_Kmv03	GB_GCA_020348925.1~CP070758.1_613	d__Bacteria; p__TA06_A; c__G020348925; o__G020348925; f__G020348925; g__G020348925; s__G020348925 sp020348925	75.4	842	205	1	10	851	5	844	0	1364
ArrA_Kmv03	GB_GCA_029289015.1~JARFUL010000156.1_3	d__Bacteria; p__Desulfobacterota; c__Syntrophobacteria; o__JARFUL01; f__JARFUL01; g__JARFUL01; s__JARFUL01 sp029289015	74.9	843	212	0	9	851	15	857	0	1364
ArrA_Kmv03	GB_GCA_020354645.1~CP070652.1_4427	d__Bacteria; p__Desulfobacterota; c__Desulfobacteria; o__Desulfobacterales; f__G020354645; g__G020354645; s__G020354645 sp020354645	74.6	839	212	1	13	851	21	858	0	1354
ArrA_BE2012	GB_GCA_034433615.1~DAOUAJ010000447.1_11	d__Bacteria; p__Chloroflexota; c__Anaerolineae; o__DUEN01; f__DUEN01; g__DAOUAJ01; s__DAOUAJ01 sp034433615	64.4	817	272	7	7	818	5	807	0	1073
ArrA_Methanoperedens	GB_GCA_034433615.1~DAOUAJ010000447.1_11	d__Bacteria; p__Chloroflexota; c__Anaerolineae; o__DUEN01; f__DUEN01; g__DAOUAJ01; s__DAOUAJ01 sp034433615	63.9	817	277	6	7	819	5	807	0	1073
ArrA_BE2012	GB_GCA_030651175.1~JAUSCR010000146.1_15	d__Bacteria; p__Chloroflexota; c__Dehalococcoidia; o__SHYF01; f__SHYF01; g__SHYF01; s__SHYF01 sp030651175	62.2	820	290	8	6	817	3	810	0	1043
ArrA_BE2012	GB_GCA_016190665.1~JACPQD010000044.1_81	d__Bacteria; p__Chloroflexota; c__Dehalococcoidia; o__JACPQD01; f__JACPQD01; g__JACPQD01; s__JACPQD01 sp016190665	62	820	291	8	5	818	1	805	0	1042
ArrA_Methanoperedens	GB_GCA_030651175.1~JAUSCR010000146.1_15	d__Bacteria; p__Chloroflexota; c__Dehalococcoidia; o__SHYF01; f__SHYF01; g__SHYF01; s__SHYF01 sp030651175	61.5	820	297	7	6	818	3	810	0	1040
ArrA_Methanoperedens	GB_GCA_016190665.1~JACPQD010000044.1_81	d__Bacteria; p__Chloroflexota; c__Dehalococcoidia; o__JACPQD01; f__JACPQD01; g__JACPQD01; s__JACPQD01 sp016190665	60.9	820	301	7	5	819	1	805	0	1029
ArrA_BE2012	GB_GCA_016210565.1~JACQUA010000173.1_44	d__Bacteria; p__Chloroflexota; c__Dehalococcoidia; o__JACQUA01; f__JACQUA01; g__JACQUA01; s__JACQUA01 sp016210565	60	820	308	9	5	818	1	806	0	1016
ArrA_Methanoperedens	GB_GCA_016210565.1~JACQUA010000173.1_44	d__Bacteria; p__Chloroflexota; c__Dehalococcoidia; o__JACQUA01; f__JACQUA01; g__JACQUA01; s__JACQUA01 sp016210565	59.5	820	313	8	5	819	1	806	0	1010
ArrA_BE2012	GB_GCA_016210565.1~JACQUA010000173.1_44	d__Bacteria; p__Chloroflexota; c__Dehalococcoidia; o__Dehalococcoidales; f__UBA2162; g__JACPSA01; s__JACPSA01 sp016193545	56.7	817	314	8	7	818	5	786	0	945
ArxA_ASW-3	GB_GCA_016188625.1~JACPHL010000095.1_3	d__Bacteria; p__Methylomirabilota; c__Methylomirabilia; o__Rokubacteriales; f__JACPHL01; g__JACPHL01; s__JACPHL01 sp016188625	56.6	804	325	7	2	782	3	805	0	937
ArrA_Methanoperedens	GB_GCA_016193545.1~JACPSA010000094.1_7	d__Bacteria; p__Chloroflexota; c__Dehalococcoidia; o__Dehalococcoidales; f__UBA2162; g__JACPSA01; s__JACPSA01 sp016193545	56.3	817	318	7	7	819	5	786	0	948
ArxA_BE2012	GB_GCA_037442985.1~JBBIPI010000060.1_2	d__Bacteria; p__Bacillota; c__DYIH01; o__DYIH01; f__JBBIPI01; g__JBBIPI01; s__JBBIPI01 sp037442985	56	853	316	10	5	850	1	801	0	914
ASW-3~00132	GB_GCA_016207095.1~JACQQF010000016.1_39	d__Bacteria; p__Methylomirabilota; c__Methylomirabilia; o__Methylomirabilales; f__Methylomirabilaceae; g__Methylomirabilis; s__Methylomirabilis sp016207095	55.8	806	332	7	2	784	3	807	0	918
ArxA_Methanoperedens	GB_GCA_037442985.1~JBBIPI010000060.1_2	d__Bacteria; p__Bacillota; c__DYIH01; o__DYIH01; f__JBBIPI01; g__JBBIPI01; s__JBBIPI01 sp037442985	55.6	851	323	9	5	850	1	801	0	910
ArxA_Mnv1	GB_GCA_037442985.1~JBBIPI010000060.1_2	d__Bacteria; p__Bacillota; c__DYIH01; o__DYIH01; f__JBBIPI01; g__JBBIPI01; s__JBBIPI01 sp037442985	55.1	851	327	9	5	850	1	801	0	899
ArxA_ASW-3	GB_GCA_016209425.1~JACQWA010000367.1_6	d__Bacteria; p__Methylomirabilota; c__Methylomirabilia; o__Rokubacteriales; f__CSP1-6; g__JACQWA01; s__JACQWA01 sp016209425	55	806	339	6	2	784	3	807	0	904
ArxA_nzgw24	GB_GCA_037442985.1~JBBIPI010000060.1_2	d__Bacteria; p__Bacillota; c__DYIH01; o__DYIH01; f__JBBIPI01; g__JBBIPI01; s__JBBIPI01 sp037442985	55	853	325	10	5	850	1	801	0	901
ArxA_ASW-1	GB_GCA_037442985.1~JBBIPI010000060.1_2	d__Bacteria; p__Bacillota; c__DYIH01; o__DYIH01; f__JBBIPI01; g__JBBIPI01; s__JBBIPI01 sp037442985	54.9	851	329	9	5	850	1	801	0	897
ArxA_SO_2017_SWC_14	GB_GCA_037442985.1~JBBIPI010000060.1_2	d__Bacteria; p__Bacillota; c__DYIH01; o__DYIH01; f__JBBIPI01; g__JBBIPI01; s__JBBIPI01 sp037442985	54.7	852	328	10	3	847	1	801	8.59e-310	880
ArxA_ASW-4	GB_GCA_037442985.1~JBBIPI010000060.1_2	d__Bacteria; p__Bacillota; c__DYIH01; o__DYIH01; f__JBBIPI01; g__JBBIPI01; s__JBBIPI01 sp037442985	54.4	853	329	10	5	849	1	801	9.24e-310	880
ArxA_BLZ2	GB_GCA_037442985.1~JBBIPI010000060.1_2	d__Bacteria; p__Bacillota; c__DYIH01; o__DYIH01; f__JBBIPI01; g__JBBIPI01; s__JBBIPI01 sp037442985	54.2	853	331	10	5	849	1	801	4.29e-308	875
E14_GCA_030650845.1~02160	GB_GCA_037442985.1~JBBIPI010000060.1_2	d__Bacteria; p__Bacillota; c__DYIH01; o__DYIH01; f__JBBIPI01; g__JBBIPI01; s__JBBIPI01 sp037442985	54	853	332	10	5	849	1	801	0	878
ArxA_BE2012	GB_GCA_016210705.1~JACQTR010000132.1_7	d__Bacteria; p__Chloroflexota; c__Dehalococcoidia; o__JACQTR01; f__JACQTR01; g__JACQTR01; s__JACQTR01 sp016210705	53.8	847	333	12	7	850	4	795	7.74e-305	867
ArxA_Methanoperedens	GB_GCA_016210705.1~JACQTR010000132.1_7	d__Bacteria; p__Chloroflexota; c__Dehalococcoidia; o__JACQTR01; f__JACQTR01; g__JACQTR01; s__JACQTR01 sp016210705	53.7	847	334	12	7	850	4	795	2.91e-307	873
RU-BES~00351	GB_GCA_037442985.1~JBBIPI010000060.1_2	d__Bacteria; p__Bacillota; c__DYIH01; o__DYIH01; f__JBBIPI01; g__JBBIPI01; s__JBBIPI01 sp037442985	53.7	851	338	9	5	849	1	801	1.14e-305	869
ASW-1~01421	GB_GCA_016210705.1~JACQTR010000132.1_7	d__Bacteria; p__Chloroflexota; c__Dehalococcoidia; o__JACQTR01; f__JACQTR01; g__JACQTR01; s__JACQTR01 sp016210705	53.4	847	337	11	7	850	4	795	5.09e-303	862
ASW-3~00132	GB_GCA_035559535.1~DATMBG010000037.1_33	d__Bacteria; p__Moduliflexota; c__Moduliflexia; o__Moduliflexales; f__JAUQPW01; g__JAUQPW01; s__JAUQPW01 sp035559535	53.3	805	352	7	3	786	4	805	0	914
Mnv1_GCA_900196725.1~03606	GB_GCA_016210705.1~JACQTR010000132.1_7	d__Bacteria; p__Chloroflexota; c__Dehalococcoidia; o__JACQTR01; f__JACQTR01; g__JACQTR01; s__JACQTR01 sp016210705	53	847	340	11	7	850	4	795	1.44e-297	848
ASW-4~01093	GB_GCA_016210705.1~JACQTR010000132.1_7	d__Bacteria; p__Chloroflexota; c__Dehalococcoidia; o__JACQTR01; f__JACQTR01; g__JACQTR01; s__JACQTR01 sp016210705	52.8	847	337	11	9	849	6	795	8.54e-299	852
nzgw24_GCA_023249105.1~03643	GB_GCA_016210705.1~JACQTR010000132.1_7	d__Bacteria; p__Chloroflexota; c__Dehalococcoidia; o__JACQTR01; f__JACQTR01; g__JACQTR01; s__JACQTR01 sp016210705	52.8	849	339	11	7	850	4	795	6.27e-304	865
E14_GCA_030650845.1~02160	GB_GCA_016210705.1~JACQTR010000132.1_7	d__Bacteria; p__Chloroflexota; c__Dehalococcoidia; o__JACQTR01; f__JACQTR01; g__JACQTR01; s__JACQTR01 sp016210705	52.7	846	339	11	9	849	6	795	2.43e-298	850
RU-BES~00351	GB_GCA_016210705.1~JACQTR010000132.1_7	d__Bacteria; p__Chloroflexota; c__Dehalococcoidia; o__JACQTR01; f__JACQTR01; g__JACQTR01; s__JACQTR01 sp016210705	52.7	845	341	11	9	849	6	795	1.21e-298	851
BLZ2~03954	GB_GCA_016210705.1~JACQTR010000132.1_7	d__Bacteria; p__Chloroflexota; c__Dehalococcoidia; o__JACQTR01; f__JACQTR01; g__JACQTR01; s__JACQTR01 sp016210705	52.4	850	340	12	7	849	4	795	5.61e-297	847
SO_2017_SWC_14~01020	GB_GCA_016210705.1~JACQTR010000132.1_7	d__Bacteria; p__Chloroflexota; c__Dehalococcoidia; o__JACQTR01; f__JACQTR01; g__JACQTR01; s__JACQTR01 sp016210705	52.4	845	343	10	7	847	6	795	8.5e-296	844

## Sheet: S3 - MAGs
Table S1	Properties and relative metagenome and metatranscriptome abundances for the dominant MAGs in the bioreactor				Metagenome relative abundance								Metatranscriptome relative abundance
			Quality Check		Arsenate and methane-fed				Nitrate and methane-fed				Arsenate and methane-fed		Nitrate and methane-fed
			CheckM2 v1.0.0		Replicate 1		Replicate 2		Replicate 1		Replicate 2		Replicate 1	Replicate 2	Replicate 1	Replicate 2
MAG ID	Accession No.	GTDB Tax	Completeness	Contamination	24 hours	36 hours	24 hours	36 hours	24 hours	36 hours	24 hours	36 hours	36 hours	36 hours	36 hours	36 hours
Methanoperedens-1	SAMN28180328	d__Archaea;p__Halobacteriota;c__Methanosarcinia;o__Methanosarcinales;f__Methanoperedenaceae;g__Methanoperedens;s__Methanoperedens nitroreducens	99.81	3.39	32.363	32.29	33.3088	28.2546	34.0855	28.2521	34.7384	30.7366	72.2849	78.6236	82.3975	85.3133
Bacteroidota-1	SAMN28180298	d__Bacteria;p__Bacteroidota;c__SZUA-365;o__SZUA-365;f__SZUA-365;g__;s__	100	1.22	23.6901	24.1797	22.0175	29.3189	17.6231	28.345	13.9147	24.9184	1.08906	1.27379	0.277433	0.152205
Melioribacteraceae-1	SAMN28180311	d__Bacteria;p__Bacteroidota;c__Ignavibacteria;o__Ignavibacteriales;f__Melioribacteraceae;g__SURF-28;s__SURF-28 sp003599395	99.86	0.05	15.4754	13.4939	16.004	13.7197	16.7835	14.4199	16.0342	14.1938	1.62795	1.12311	0.723987	0.485009
Truperaceae		d__Bacteria;p__Deinococcota;c__Deinococci;o__Deinococcales;f__Trueperaceae;g__JAAYYF01;s__	98.88	0.65	3.55002	2.79813	3.43587	2.9878	3.25637	3.38245	3.66259	3.23399	0.147969	0.104536	0.232295	0.166624
Kuenenia-1	SAMN28180310	d__Bacteria;p__Planctomycetota;c__Brocadiae;o__Brocadiales;f__Brocadiaceae;g__Kuenenia;s__Kuenenia stuttgartiensis	99.97	1.36	1.40293	1.29584	1.44972	1.24173	1.5348	1.27303	1.48537	1.27195	6.39923	5.75057	3.36325	2.85467
Anaerolineales-4		d__Bacteria;p__Chloroflexota;c__Anaerolineae;o__Anaerolineales;f__EnvOPS12;g__JAABUE01;s__	95.37	1.41	1.39799	1.52413	1.38625	1.32354	1.64392	1.32422	1.69478	1.40786	3.08712	2.20142	0.80462	0.576705
Anaerolineales-5		d__Bacteria;p__Chloroflexota;c__Anaerolineae;o__Anaerolineales;f__UBA11579;g__;s__	93.34	1.56	1.35021	1.72282	1.29504	1.34153	1.63249	1.33286	1.79119	1.51245	0.0850941	0.105561	0.144877	0.103268
Kiritmatiellae-2		d__Bacteria;p__Verrucomicrobiota;c__Kiritimatiellae;o__LD1-PB3;f__CAIVKH01;g__;s__	97.32	0.1	1.0863	1.37406	1.01144	1.11936	1.40936	1.33782	1.48372	1.45794	0.0334281	0.0377448	0.0283765	0.0155644
Arenicellales		d__Bacteria;p__Proteobacteria;c__Gammaproteobacteria;o__Arenicellales;f__CAJQKF01;g__;s__	95.29	0.71	1.07143	1.11627	1.13687	1.15813	1.18391	1.19247	1.405	1.19016	0.0143742	0.0160664	0.0417217	0.0210787
Bacteroidota-2		d__Bacteria;p__Bacteroidota;c__UBA10030;o__UBA10030;f__UBA10030;g__UBA6688;s__	100	0.15	1.03698	0.830612	1.02241	0.97339	1.05517	0.969826	1.00145	0.891856	0.214964	0.198964	0.0992424	0.0896202
Longimicrobiales-2		d__Bacteria;p__Gemmatimonadota;c__Gemmatimonadetes;o__Longimicrobiales;f__UBA6960;g__SZUA-318;s__	91.6	5.36	1.01105	0.824388	0.979374	0.993825	0.921852	0.998904	1.01328	0.904016	0.115096	0.0745557	0.137878	0.0912888
Opitutaceae		d__Bacteria;p__Verrucomicrobiota;c__Verrucomicrobiae;o__Opitutales;f__Opitutaceae;g__;s__	88.74	1.48	0.693152	0.56636	0.669656	0.656122	0.652536	0.651707	0.673051	0.622533	0.0131475	0.00896898	0.115207	0.0849765
Anaerolineales-3		d__Bacteria;p__Chloroflexota;c__Anaerolineae;o__Anaerolineales;f__EnvOPS12;g__OLB14;s__	98.69	1.2	0.587774	0.84264	0.64636	0.801634	0.767825	0.809623	0.841573	0.804587	0.0815247	0.111336	0.0323205	0.0203879
Desulfobacillus-2		d__Bacteria;p__Proteobacteria;c__Gammaproteobacteria;o__Burkholderiales;f__Rhodocyclaceae;g__Desulfobacillus;s__Desulfobacillus sp002840845	94.75	0.88	0.538164	0.461796	0.527765	0.508959	0.565922	0.539535	0.58692	0.512908	0.00808351	0.0132432	0.0115847	0.00817075
Phycisphaerales-1	SAMN28180316	d__Bacteria;p__Planctomycetota;c__Phycisphaerae;o__Phycisphaerales;f__UBA1924;g__CAADGN01;s__CAADGN01 sp900696545	94.39	2.19	0.507917	0.570826	0.519306	0.617066	0.459601	0.472057	0.576956	0.467586	0.486653	0.384337	0.181488	0.138542
Roseovarius-1	SAMN28180322	d__Bacteria;p__Proteobacteria;c__Alphaproteobacteria;o__Rhodobacterales;f__Rhodobacteraceae;g__Roseovarius;s__	91.52	2.73	0.287061	0.369203	0.279595	0.357384	0.397285	0.414683	0.471067	0.468986	0.0242467	0.023712	0.0195756	0.0115531
Rhodocyclaceae-2		d__Bacteria;p__Proteobacteria;c__Gammaproteobacteria;o__Burkholderiales;f__Rhodocyclaceae;g__JACOUN01;s__	84.38	3.47	0.25837	0.24834	0.254143	0.263747	0.292531	0.268229	0.320496	0.259322	0.0124398	0.010323	0.0158545	0.00860257
Rhodocyclaceae-4		d__Bacteria;p__Proteobacteria;c__Gammaproteobacteria;o__Burkholderiales;f__Rhodocyclaceae;g__JACOUN01;s__	84.61	1.39	0.245147	0.234818	0.242234	0.248271	0.297052	0.271969	0.325405	0.264094	0.0114777	0.011847	0.0130673	0.00667893
Burkholderiaceae-1	SAMN28180299	d__Bacteria;p__Proteobacteria;c__Gammaproteobacteria;o__Burkholderiales;f__Burkholderiaceae;g__SCN-69-89;s__	88.42	2.71	0.228964	0.231078	0.234826	0.24032	0.233124	0.248172	0.285394	0.249741	0.0124491	0.0190703	0.0109102	0.00560819
Rhodocyclaceae-6		d__Bacteria;p__Proteobacteria;c__Gammaproteobacteria;o__Burkholderiales;f__Rhodocyclaceae;g__JACOUN01;s__	71.61	3.13	0.219302	0.214284	0.219372	0.224696	0.261753	0.237037	0.284085	0.232054	0.0186831	0.0101744	0.0101288	0.00477324
Methylomirabilis-1	SAMN28180312	d__Bacteria;p__Methylomirabilota;c__Methylomirabilia;o__Methylomirabilales;f__Methylomirabilaceae;g__Methylomirabilis;s__Methylomirabilis sp003104975	86.8	2.17	0.21731	0.204204	0.217407	0.210931	0.196169	0.174454	0.209632	0.171768	0.0103029	0.00628299	0.00139949	0.00235568
Ignavibacterium-1	SAMN28180308	d__Bacteria;p__Bacteroidota;c__Ignavibacteria;o__Ignavibacteriales;f__Ignavibacteriaceae;g__IGN3;s__IGN3 sp900696555	93.25	1.58	0.208766	0.210677	0.212596	0.196367	0.22495	0.205562	0.260064	0.222242	0.149099	0.194147	0.0569736	0.0509798
Xanthobacteraceae-1	SAMN28180326	d__Bacteria;p__Proteobacteria;c__Alphaproteobacteria;o__Rhizobiales;f__Xanthobacteraceae;g__FEB-22;s__FEB-22 sp003105195	91.7	3.07	0.128937	0.115107	0.143128	0.0859083	0.249037	0.183958	0.394301	0.267862	0.0520782	0.0861027	0.00993506	0.00818146
Planctomycetota-1	SAMN28180317	d__Bacteria;p__Planctomycetota;c__UBA8742;o__UBA2392;f__UBA2392;g__JADJRK01;s__	86.92	3.1	0.124208	0.12285	0.125131	0.127067	0.135311	0.144278	0.164283	0.142509	0.0552866	0.0560233	0.106447	0.0895947
Fimbriimonadaceae-1	SAMN28180303	d__Bacteria;p__Armatimonadota;c__Fimbriimonadia;o__Fimbriimonadales;f__Fimbriimonadaceae;g__H1-ARM1;s__H1-ARM1 sp001567425	97.13	0.07	0.122412	0.129994	0.129913	0.126178	0.15329	0.145389	0.182951	0.150299	0.00512472	0.00731805	0.00412625	0.00220473
Anaerolineales-2	SAMN28180296	d__Bacteria;p__Chloroflexota;c__Anaerolineae;o__Anaerolineales;f__EnvOPS12;g__UBA7227;s__UBA7227 sp002473085	98.87	0.45	0.0976001	0.105947	0.10496	0.103045	0.112904	0.106778	0.124526	0.104894	0.0168776	0.0189128	0.0111658	0.00742968
Acidimicrobiia-4	SAMN28180292	d__Bacteria;p__Actinobacteriota;c__Acidimicrobiia;o__UBA5794;f__UBA5794;g__UBA5794;s__UBA5794 sp002418265	95.53	0.61	0	0.0871242	0	0.0296568	0	0	0.0577245	0.0583695	0.0013637	0.00232132	0.000929353	0.000746173
Aggregatilineales-1		d__Bacteria;p__Chloroflexota;c__Anaerolineae;o__Aggregatilineales;f__JAFGMM01;g__;s__	86.16	4.57	0	0.046237	0	0	0	0	0	0	0.0912828	0.140748	0.00790307	0.00671454
Aggregatilineales-2		d__Bacteria;p__Chloroflexota;c__Anaerolineae;o__Aggregatilineales;f__Aggregatilineaceae;g__UBA2029;s__	93.52	9.61	0	0.0255694	0	0.0164274	0	0	0	0	0.0423997	0.0781044	0.00388209	0.00315968
Hyphomicrobium		d__Bacteria;p__Proteobacteria;c__Alphaproteobacteria;o__Rhizobiales;f__Hyphomicrobiaceae;g__Hyphomicrobium_A;s__Hyphomicrobium_A sp009026145	77.93	5.01	0	0.0452461	0	0.0424827	0	0	0.0476656	0	0.00647875	0.00367549	0.00251045	0.00192962

## Sheet: S4 - ANME TPM
Table S2			Gene expression analysis of Methanoperedens population							TPM				Normalised raw count (DESeq2)
										Arsenate		Nitrate		Arsenate		Nitrate		DE. Nitrate VS Arsenate
seq_id	prokka_annotation	CXXCH	uniprot_desc	uniref100_e-value	uniref100_desc	KOID	KO_bitscore	KO_e-value	KO_desc	A1	A2	B1	B2	A1-N	A2-N	B1-N	B2-N	baseMean	log2FoldChange	lfcSE	pvalue	padj
Methanoperedens_03112	30S ribosomal protein S12	0	30S ribosomal protein S12	273.9	30S ribosomal protein S12	K02973	195	2.8e-58	small subunit ribosomal protein S23e	0	0	800.977	788.997	0	0	139.8	143.724	70.8809	7.86319	2.65804	1.66921e-07	1.13835e-06
Methanoperedens_03356	4-hydroxy-tetrahydrodipicolite reductase	0	4-hydroxy-tetrahydrodipicolite reductase	516.2	4-hydroxy-tetrahydrodipicolite reductase	K00215	304.7	2.3e-91	4-hydroxy-tetrahydrodipicolite reductase [EC:1.17.1.8]	0	0	300.127	308.932	0	0	97.0739	104.286	50.34	7.25184	2.59475	1.16317e-06	7.02109e-06
Methanoperedens_01931	hypothetical protein	0		1002.7	Divergent AAA domain-containing protein					0	0	136.088	126.899	0	0	82.7179	80.5015	40.8049	6.86858	2.55438	3.55644e-06	1.99794e-05
Methanoperedens_02291	hypothetical protein	0		1835.5	Uncharacterized protein					0	0	60.0103	70.4661	0	0	67.6783	82.941	37.6548	6.70979	2.54706	6.20797e-06	3.38692e-05
Methanoperedens_00709	V-type ATP synthase subunit F	0	V-type ATP synthase subunit F	200.3	V-type ATP synthase subunit F	K02122	80.9	1.3e-23	V/A-type H+/+-transporting ATPase subunit F	0	0	406.07	475.563	0	0	49.5624	60.1729	27.4338	6.11861	2.49738	3.0508e-05	0.000152379
Methanoperedens_00950	hypothetical protein	0	DP-reducing hydrogese subunit HndA	318.5	DH:ubiquinone oxidoreductase 24 kD subunit	K00334	168.2	7e-50	DH-quinone oxidoreductase subunit E [EC:7.1.1.2]	0	0	194.253	211.242	0	0	41.0171	46.5527	21.8924	5.67421	2.4529	8.61449e-05	0.000399988
Methanoperedens_02674	hypothetical protein	0		492.3	CRISPR-associated protein Cas5	K19090	68.9	8.8e-20	CRISPR-associated protein Cas5t	3.47834	0	395.696	411.561	2.38768	0	119.292	129.494	62.7932	5.62061	1.2819	4.35935e-06	2.41552e-05
Methanoperedens_00973	hypothetical protein	0		237.7	Uncharacterized protein					6.76495	0	785.017	737.609	2.38768	0	121.684	119.329	60.8503	5.57139	1.28042	5.07906e-06	2.7925e-05
Methanoperedens_01495	putative adenylyl-sulfate kise	0	Probable adenylyl-sulfate kise	376.7	Adenylylsulfate kise-like kise	K00860	144.8	7.4e-43	adenylylsulfate kise [EC:2.7.1.25]	0	0	153.431	185.899	0	0	35.2064	44.5198	19.9315	5.47208	2.44955	0.000146882	0.000649071
Methanoperedens_01711	hypothetical protein	0	D-directed R polymerase subunit K	147.5	D-directed R polymerase subunit K	K03055	105.3	2.1e-31	D-directed R polymerase subunit K [EC:2.7.7.6]	0	0	386.396	357.551	0	0	37.2572	35.9817	18.3097	5.31431	2.42504	0.000192893	0.000816906
Methanoperedens_01604	hypothetical protein	0		602.1	Methyltransferase, FkbM family	K21402	72.1	8.9e-21	2-O-methyltransferase [EC:2.1.1.-]	0	0	95.2353	99.9421	0	0	34.5228	38.4212	18.236	5.30349	2.42742	0.000200875	0.000846779
Methanoperedens_03311	F(420)H(2) dehydrogese subunit D	0	DH-quinone oxidoreductase subunit D	765	DH dehydrogese I, D subunit	K00333	570.8	8.8e-172	DH-quinone oxidoreductase subunit D [EC:7.1.1.2]	4.48642	0	332.694	350.004	4.77536	0	155.523	170.761	82.7649	5.26294	0.987639	1.49403e-07	1.02629e-06
Methanoperedens_03295	hypothetical protein	0		494.6	Uroporphyrinogen-III synthase	K01719	147	1.8e-43	uroporphyrinogen-III synthase [EC:4.2.1.75]	0	0	105.699	114.876	0	0	33.1555	37.608	17.6909	5.23859	2.42503	0.000233378	0.000970811
Methanoperedens_01887	Nucleoside diphosphate kise	0	Nucleoside diphosphate kise	285.8	Nucleoside diphosphate kise	K00940	235.8	1.3e-70	nucleoside-diphosphate kise [EC:2.7.4.6]	5.80506	0	565.773	489.538	2.38768	0	102.201	92.2922	49.2202	5.22594	1.28763	1.71807e-05	8.87827e-05
Methanoperedens_03308	F(420)H(2) dehydrogese subunit A	0	D(P)H-quinone oxidoreductase subunit 3, chloroplastic	246.1	DH:ubiquinone oxidoreductase subunit 3 (Chain A)	K00330	175.7	2.7e-52	DH-quinone oxidoreductase subunit A [EC:7.1.1.2]	0	0	235.241	195.332	0	0	35.89	31.1029	16.7482	5.11849	2.41963	0.000303646	0.00123416
Methanoperedens_01250	Sirohydrochlorin cobaltochelatase	0	Sirohydrochlorin cobaltochelatase	268.5	Sirohydrochlorin cobaltochelatase	K22011	173.7	2.7e-52	sirohydrochlorin cobalto/nickelchelatase [EC:4.99.1.3 4.99.1.11]	0	0	155.355	241.125	0	0	25.9775	42.0803	17.0145	5.08353	2.47207	0.0004114	0.00162103
Methanoperedens_02675	hypothetical protein	0	Putative CRISPR-associated nuclease/helicase Cas3	1491.9	CRISPR-associated helicase Cas3/CRISPR-associated endonuclease Cas3-HD	K07012	356.6	5.6e-107	CRISPR-associated endonuclease/helicase Cas3 [EC:3.1.-.- 3.6.4.-]	1.15477	0	89.9617	96.0942	2.38768	0	81.6925	90.2593	43.5849	5.02861	1.29064	3.27004e-05	0.000162756
Methanoperedens_01148	hypothetical protein	0	D-aminoacyl-tR deacylase	938.3	D-aminoacyl-tR deacylase	K09716	452.3	4.4e-136	D-aminoacyl-tR deacylase [EC:3.1.1.96]	3.68733	4.50447	338.943	331.841	4.77536	5.61525	192.781	196.782	99.9882	5.01567	0.832441	1.72368e-09	1.48185e-08
Methanoperedens_02487	putative ATP-dependent R helicase	0	DEAD-box ATP-dependent R helicase CshA	773.5	D/R helicase, superfamily II	K05592	489.9	2.5e-147	ATP-dependent R helicase DeaD [EC:3.6.4.13]	2.15867	0	141.431	195.271	2.38768	0	68.7037	96.5612	41.9131	4.93585	1.32074	5.39249e-05	0.000257985
Methanoperedens_00048	GTP 3',8-cyclase	0	Uncharacterized protein MJ0907	753.4	Radical SAM additiol 4Fe4S-binding domain	K06871	174.9	6.6e-52	uncharacterized protein	0	0	60.0661	75.5695	0	0	26.3193	34.5587	15.2195	4.89449	2.42501	0.000514059	0.0019869
Methanoperedens_00634	Xanthine phosphoribosyltransferase	0	Xanthine-guanine phosphoribosyltransferase	497.7	Putative phosphoribosyltransferase	K07101	182.3	2e-54	uncharacterized protein	0	0	115.52	86.4418	0	0	33.8391	26.4273	15.0666	4.87265	2.42019	0.000527679	0.00203124
Methanoperedens_02506	Ribonuclease P protein component 1	0	Ribonuclease P protein component 1	167.5	Ribonuclease P protein component 1	K03538	82.8	5.2e-24	ribonuclease P protein subunit POP4 [EC:3.1.26.5]	16.5221	0	1104.04	814.804	4.77536	0	140.142	107.945	63.2156	4.82665	1.01726	1.95752e-06	1.14035e-05
Methanoperedens_02680	CRISPR-associated endonuclease Cas1 1	0	CRISPR-associated endonuclease Cas1 1	648.7	CRISPR-associated endonuclease Cas1	K15342	285.2	2.4e-85	CRISP-associated protein Cas1	0	0	67.6278	75.5929	0	0	26.6611	31.1029	14.441	4.79803	2.40676	0.000589006	0.00224297
Methanoperedens_00036	ATP-dependent D helicase Hel308	0	ATP-dependent D helicase Hel308	1455.3	Superfamily II helicase	K03726	397.4	2.6e-119	helicase [EC:3.6.4.-]	3.52592	0	179.675	167.226	7.16304	0	160.309	155.718	80.7973	4.71478	0.841781	2.10564e-08	1.59298e-07
Methanoperedens_02950	hypothetical protein	0		225.3	Uncharacterized protein					0	0	169.384	189.185	0	0	25.6357	29.8831	13.8797	4.70977	2.40383	0.000699422	0.00259042
Methanoperedens_03390	hypothetical protein	0		243.8	Uncharacterized protein					0	0	184.528	158.348	0	0	29.0538	26.0207	13.7686	4.69386	2.39945	0.000711217	0.00262042
Methanoperedens_01051	hypothetical protein	0		297	Multisubunit +/H+ antiporter, MnhB subunit	K05566	138.6	4.6e-41	multicomponent +:H+ antiporter subunit B	0	0	140.024	138.374	0	0	27.0029	27.8503	13.7133	4.69144	2.39623	0.000707237	0.00260915
Methanoperedens_00322	hypothetical protein	0		746.5	Uncharacterized protein					4.41722	16.1883	526.98	488.601	4.77536	16.8458	250.205	241.708	128.383	4.67063	0.680206	2.87014e-12	3.14386e-11
Methanoperedens_03306	Dihydroorotate dehydrogese	0	Uncharacterized protein MJ0115	735.3	Putative methanogenesis marker domain 9	K05540	111.5	9.7e-33	tR-dihydrouridine synthase B [EC:1.-.-.-]	4.18077	10.2145	372.035	388.285	4.77536	11.2305	186.628	191.496	98.5325	4.583	0.745217	4.4876e-10	4.13355e-09
Methanoperedens_01710	30S ribosomal protein S2	0	30S ribosomal protein S2	413.3	30S ribosomal protein S2	K02998	167.2	1e-49	small subunit ribosomal protein SAe	12.3323	10.0435	694.091	707.061	7.16304	5.61525	177.057	188.243	94.5198	4.55075	0.745252	7.31879e-10	6.5089e-09
Methanoperedens_03445	hypothetical protein	0		152.1	Putative membrane protein (DUF2078)	K08982	83.4	3.1e-24	putative membrane protein	0	0	297.773	224.227	0	0	28.712	22.5648	12.8192	4.50724	2.40785	0.00104926	0.00372093
Methanoperedens_01948	hypothetical protein	0		120.2	Uncharacterized protein					0	0	280.048	417.581	0	0	20.5086	31.916	13.1061	4.50713	2.44192	0.00116854	0.00408773
Methanoperedens_02673	hypothetical protein	0		575.1	CRISPR-associated protein Cas7/Cst2/DevR, subtype I-B/TNEAP	K19075	255.8	1.2e-76	CRISPR-associated protein Cst2	11.6495	0	479.405	454.952	9.55072	0	172.614	170.964	88.2822	4.47682	0.751553	2.12096e-09	1.80155e-08
Methanoperedens_01888	50S ribosomal protein L24e	0	50S ribosomal protein L24e	136.7	50S ribosomal protein L24e	K02896	83.9	3.3e-24	large subunit ribosomal protein L24e	0	0	275.74	336.356	0	0	21.8758	27.8503	12.4315	4.44091	2.40837	0.00118797	0.0041369
Methanoperedens_01059	30S ribosomal protein S11	0	30S ribosomal protein S11	247.7	30S ribosomal protein S11	K02948	113	3.7e-33	small subunit ribosomal protein S11	6.76495	16.5282	637.275	599.386	2.38768	5.61525	98.7829	96.5612	50.8368	4.43352	0.999454	6.44987e-06	3.51121e-05
Methanoperedens_01644	[Methyl-coenzyme M reductase subunit alpha]-arginine C-methyltransferase	0	[Methyl-coenzyme M reductase subunit alpha]-arginine C-methyltransferase	833.6	Methanogenesis marker radical SAM protein					2.09039	0	112.428	119.203	2.38768	0	56.3986	62.409	30.2988	4.41754	1.30464	0.000206484	0.00086528
Methanoperedens_01819	hypothetical protein	0	Uncharacterized protein MJ1210	494.6	TIGR00162 family protein	K07159	348.1	6.2e-105	uncharacterized protein	10.1474	24.7923	751.941	777.819	7.16304	16.8458	233.114	251.669	127.198	4.41152	0.633098	1.23714e-12	1.37638e-11
Methanoperedens_01481	30S ribosomal protein S10	0	30S ribosomal protein S10	208	30S ribosomal protein S10	K02969	88.7	1.2e-25	small subunit ribosomal protein S20e	41.3052	0	1553.73	1448.54	11.9384	0	197.224	191.699	100.215	4.37275	0.687926	1.58613e-10	1.52022e-09
Methanoperedens_00908	30S ribosomal protein S6e	0	30S ribosomal protein S6e	256.9	30S ribosomal protein S6e	K02991	122.1	5.9e-36	small subunit ribosomal protein S6e	0	0	120.021	167.984	0	0	19.4831	28.4601	11.9858	4.30993	2.42509	0.00156776	0.00528861
Methanoperedens_00159	Amidophosphoribosyltransferase	0	Amidophosphoribosyltransferase	966.1	Amidophosphoribosyltransferase	K00764	666.2	6.8e-201	amidophosphoribosyltransferase [EC:2.4.2.14]	10.372	8.44702	456.417	461.094	14.3261	11.2305	276.866	291.92	148.585	4.28574	0.554295	5.65249e-15	7.67278e-14
Methanoperedens_01709	hypothetical protein	0	MEMO1 family protein Mbar_A1422	523.5	MEMO1 family protein ANME2D_01470	K06990	276.7	7.8e-83	MEMO1 family protein	3.24207	7.92107	261.026	269.187	2.38768	5.61525	84.4269	90.8692	45.8248	4.25545	1.00607	1.42432e-05	7.44162e-05
Methanoperedens_03173	hypothetical protein	0	Uncharacterized protein MTH_114	876.7	Putative peptide-modifying radical SAM enzyme, Mhun_1560 family	K06871	271.1	4.6e-81	uncharacterized protein	4.13052	5.04587	216.768	238.994	4.77536	5.61525	110.063	126.444	61.7244	4.24191	0.857369	4.17534e-07	2.69215e-06
Methanoperedens_02826	Glyoxylate/hydroxypyruvate reductase B	0	D-3-phosphoglycerate dehydrogese	1005.7	D-3-phosphoglycerate dehydrogese	K00058	537.8	6.1e-162	D-3-phosphoglycerate dehydrogese / 2-oxoglutarate reductase [EC:1.1.1.95 1.1.1.399]	9.83758	4.00588	389.075	386.78	14.3261	5.61525	248.837	235.406	126.046	4.23657	0.592123	5.13282e-13	5.89547e-12
Methanoperedens_03275	Peptidyl-tR hydrolase	0	Peptidyl-tR hydrolase	226.1	Aminoacyl-tR hydrolase	K04794	159.5	2.2e-47	peptidyl-tR hydrolase, PTH2 family [EC:3.1.1.29]	0	0	147.267	166.464	0	0	20.8504	24.5977	11.362	4.23456	2.39217	0.00164353	0.00550497
Methanoperedens_01672	hypothetical protein	0		135.2	AsnC family protein	K06154	28.7	2e-07	Lrp/AsnC family transcriptiol regulator, involved in the regulation of lysine biosynthesis	0	0	236.041	280.414	0	0	20.1668	25.0043	11.2928	4.21044	2.3987	0.00173597	0.00576016
Methanoperedens_01889	30S ribosomal protein S28e	0	30S ribosomal protein S28e	142.5	30S ribosomal protein S28e	K02979	90.6	2.3e-26	small subunit ribosomal protein S28e	0	0	256.711	237.161	0	0	22.5594	21.955	11.1286	4.19642	2.38371	0.00171913	0.00571768
Methanoperedens_02174	hypothetical protein	0		338.2	Uncharacterized protein					0	0	85.5237	136.651	0	0	17.4323	29.2733	11.6764	4.19282	2.46241	0.00203675	0.00661884
Methanoperedens_02796	Putative FKBP-type peptidyl-prolyl cis-trans isomerase	0	Long-type peptidyl-prolyl cis-trans isomerase	453.8	Peptidyl-prolyl cis-trans isomerase	K03775	139.6	1.8e-41	FKBP-type peptidyl-prolyl cis-trans isomerase SlyD [EC:5.2.1.8]	26.4936	9.24706	941.308	875.96	16.7138	5.61525	260.801	253.092	134.055	4.14813	0.561138	8.70744e-14	1.06478e-12
Methanoperedens_00968	hypothetical protein	0		99.4	Uncharacterized protein					16.5221	40.367	1416.4	1095.61	2.38768	5.61525	89.8959	72.5734	42.618	4.11738	1.02647	2.98264e-05	0.000149501
Methanoperedens_00935	protein kise UbiB	0	Uncharacterized protein sll1770	1077	Putative unusual protein kise	K03688	618.1	3.9e-186	ubiquinone biosynthesis protein	1.53146	0	69.8873	71.4007	2.38768	0	47.8533	51.025	25.3165	4.10409	1.31253	0.00047763	0.00185621
Methanoperedens_02224	hypothetical protein	0		512.7	CRISPR-associated exonuclease Cas4	K07464	74	1.5e-21	CRISPR-associated exonuclease Cas4 [EC:3.1.12.1]	0	8.29677	193.709	144.446	0	5.61525	59.8167	44.3165	27.4371	4.07156	1.34864	0.000500721	0.00194064
Methanoperedens_00717	hypothetical protein	0		337.4	Putative membrane-bound metal-dependent hydrolase (DUF457)	K07038	46.4	6.6e-13	inner membrane protein	5.05382	0	220.744	235.622	2.38768	0	45.8025	50.8217	24.753	4.06273	1.3165	0.000538241	0.00206629
Methanoperedens_01822	hypothetical protein	0		277.7	Uncharacterized protein					0	0	129.728	134.943	0	0	21.534	20.1254	10.4148	4.03026	2.38722	0.00227072	0.00728736
Methanoperedens_03186	hypothetical protein	0	Uncharacterized protease MJ1657	725.7	Collagese-like protease	K08303	43.6	2.7e-12	putative protease [EC:3.4.-.-]	12.3797	6.04923	380.123	438.744	11.9384	5.61525	160.992	193.936	93.1204	3.97482	0.656119	6.21657e-10	5.63463e-09
Methanoperedens_01097	Sulfopyruvate decarboxylase	0	Sulfopyruvate decarboxylase	723	Sulfopyruvate decarboxylase subunit beta	K24393	525.3	1.3e-158	sulfopyruvate decarboxylase [EC:4.1.1.79]	4.6067	11.2551	277.796	267.829	4.77536	11.2305	126.47	127.257	67.4332	3.96558	0.760793	7.37407e-08	5.28289e-07
Methanoperedens_02319	hypothetical protein	0		181	Uncharacterized protein					8.94947	0	405.487	357.404	2.38768	0	47.5115	43.7066	23.4015	3.96155	1.3195	0.000692094	0.00257336
Methanoperedens_01146	7-carboxy-7-deazaguanine synthase	0	7-carboxy-7-deazaguanine synthase	503.1	7-carboxy-7-deazaguanine synthase	K10026	135.5	4.2e-40	7-carboxy-7-deazaguanine synthase [EC:4.3.99.3]	3.50673	0	142.882	144.603	2.38768	0	42.7262	45.1297	22.5609	3.89844	1.321	0.000807328	0.00292515
Methanoperedens_02502	30S ribosomal protein S19	0	30S ribosomal protein S19	271.6	30S ribosomal protein S19P	K02958	142.5	2.2e-42	small subunit ribosomal protein S15e	18.6772	60.843	1290.66	1071.99	7.16304	22.461	217.391	188.243	108.815	3.89312	0.623918	8.2805e-11	8.21391e-10
Methanoperedens_02293	hypothetical protein	0		439.1	CRISPR type I-D/CYANO-associated protein Csc1	K19120	59.4	6.5e-17	CRISPR-associated protein Csc1	0	0	60.4799	93.6531	0	0	15.7232	25.4108	10.2835	3.88224	2.46139	0.00318442	0.00976397
Methanoperedens_02341	D primase DG	0	D primase DG	812.8	D primase DG	K02316	71.6	1.2e-20	D primase [EC:2.7.7.101]	9.83008	9.60679	342.851	362.261	11.9384	11.2305	182.868	201.66	101.924	3.87617	0.600316	4.24959e-11	4.30575e-10
Methanoperedens_00220	hypothetical protein	0		381.3	Uncharacterized protein					4.85395	0	196.192	193.846	2.38768	0	42.3844	43.9099	22.1705	3.86725	1.32177	0.000870241	0.00313309
Methanoperedens_00644	Translation initiation factor 6	0	Translation initiation factor 6	325.5	Translation initiation factor 6	K03264	169.8	1.7e-50	translation initiation factor 6	27.8428	29.1539	959.425	995.189	16.7138	16.8458	252.939	273.827	140.081	3.8535	0.512144	1.87929e-14	2.45693e-13
Methanoperedens_03278	Epoxyqueuosine reductase QueH	0	Epoxyqueuosine reductase QueH	386	Uncharacterized protein	K09765	231.7	2.4e-69	epoxyqueuosine reductase [EC:1.17.99.6]	0	0	90.2888	95.9254	0	0	20.1668	18.2958	9.61564	3.82145	2.39324	0.00315148	0.00969713
Methanoperedens_02089	Protein	0	Protein AF_1969	407.5	Protein ANME2D_00777	K09141	236.2	4.8e-71	uncharacterized protein	17.2693	21.0963	679.715	609.47	9.55072	11.2305	165.094	153.481	84.8392	3.79369	0.641621	1.27447e-09	1.11251e-08
Methanoperedens_01493	S-inosyl-L-homocysteine hydrolase	0	Adenosylhomocysteise	828.6	S-inosyl-L-homocysteine hydrolase	K01251	554.3	5.3e-167	adenosylhomocysteise [EC:3.3.1.1]	8.2019	10.0195	274.033	338.594	9.55072	11.2305	140.142	180.722	85.4112	3.78808	0.670762	4.8277e-09	3.96991e-08
Methanoperedens_03528	hypothetical protein	0	tR(Phe) (4-demethylwyosine(37)-C(7)) aminocarboxypropyltransferase	662.9	tR(Phe) (4-demethylwyosine(37)-C(7)) aminocarboxypropyltransferase	K07055	300.9	4.4e-90	tR wybutosine-synthesizing protein 2 [EC:2.5.1.114]	5.1446	0	151.763	150.507	4.77536	0	61.8675	64.0353	32.6695	3.76002	1.02766	0.000133706	0.000601147
Methanoperedens_03312	F(420)H(2) dehydrogese subunit H	0	DH-quinone oxidoreductase subunit H	672.2	F(420)H(2) oxidoreductase subunit H	K00337	482	7.3e-145	DH-quinone oxidoreductase subunit H [EC:7.1.1.2]	13.8946	0	293.636	360.464	14.3261	0	132.964	170.151	79.3602	3.7538	0.699025	3.30649e-08	2.43649e-07
Methanoperedens_02043	hypothetical protein	0		526.2	Fe-S oxidoreductase	K04034	165	5.8e-49	aerobic magnesium-protoporphyrin IX monomethyl ester cyclase [EC:1.21.98.3]	10.3512	8.43005	325.036	365.956	7.16304	5.61525	98.7829	116.28	56.9603	3.7327	0.777846	6.42988e-07	4.07178e-06
Methanoperedens_00643	50S ribosomal protein L31e	0	50S ribosomal protein L31e	172.2	50S ribosomal protein L31e	K02910	65.4	1.2e-18	large subunit ribosomal protein L31e	97.6306	95.4129	2991.42	2919.68	23.8768	22.461	321.301	327.292	173.733	3.70057	0.441489	1.73629e-17	2.72147e-16
Methanoperedens_02991	hypothetical protein	0	Uncharacterized sodium-dependent transporter MJ1319	735.7	Transporter	K03308	486.3	3.1e-146	neurotransmitter:+ symporter, NSS family	3.98677	0	102.663	134.777	4.77536	0	54.0059	66.2715	31.2632	3.67795	1.04838	0.000209475	0.000876518
Methanoperedens_01251	Coenzyme F(430) synthetase	0	Coenzyme F(430) synthetase	902.1	UDP-N-acetylmuramyl pentapeptide synthase	K21612	419	3.7e-126	coenzyme F430 synthetase [EC:6.4.1.9]	3.69526	4.51416	154.779	131.443	4.77536	5.61525	87.845	77.249	43.8711	3.67318	0.873976	1.05991e-05	5.61001e-05
Methanoperedens_01496	Fructose-1,6-bisphosphatase	0	Fructose-1,6-bisphosphatase/inositol-1-monophosphatase	532.7	Fructose-bisphosphatase	K01092	141.4	9.3e-42	myo-inositol-1(or 4)-monophosphatase [EC:3.1.3.25]	3.14707	0	117.969	108.728	2.38768	0	39.3081	37.8113	19.8768	3.6663	1.33141	0.00141203	0.00482643
Methanoperedens_01969	hypothetical protein	0		166.4	Uncharacterized protein	K07237	43.2	5.9e-12	tR 2-thiouridine synthesizing protein B	10.4774	0	382.505	365.878	2.38768	0	38.2827	38.2179	19.7221	3.65275	1.33163	0.00145543	0.00496281
Methanoperedens_02357	Digeranylgeranylglyceryl phosphate synthase	0	Digeranylgeranylglyceryl phosphate synthase	439.1	Digeranylgeranylglyceryl phosphate synthase	K17105	230.1	6.6e-69	geranylgeranylglycerol-phosphate geranylgeranyltransferase [EC:2.5.1.42]	3.07939	0	107.402	112.11	2.38768	0	36.5736	39.8442	19.7014	3.64923	1.33452	0.00148053	0.00503629
Methanoperedens_01982	hypothetical protein	0		396.4	Uncharacterized protein					4.49816	0	155.419	162.927	2.38768	0	36.2318	39.6409	19.5651	3.63612	1.33547	0.00152763	0.00517788
Methanoperedens_02838	LL-diaminopimelate aminotransferase	0	LL-diaminopimelate aminotransferase	779.6	Aminotransferase	K10206	438.2	1e-131	LL-diaminopimelate aminotransferase [EC:2.6.1.83]	6.7121	5.46636	233.374	187.429	7.16304	5.61525	109.379	91.6823	53.4599	3.62278	0.78323	1.40365e-06	8.31349e-06
Methanoperedens_00320	Ribonuclease P protein component 3	0	Ribonuclease P protein component 3	438.7	Ribonuclease P protein component 3	K03539	71.7	1.3e-20	ribonuclease P/MRP protein subunit RPP1 [EC:3.1.26.5]	3.81844	0	144.38	124.122	2.38768	0	39.6499	35.5752	19.4032	3.61714	1.33753	0.00160065	0.00539316
Methanoperedens_02713	hypothetical protein	0		942.2	Major Facilitator Superfamily transporter	K08153	76.9	2.8e-22	MFS transporter, DHA1 family, multidrug resistance protein	5.19647	12.6961	197.615	282.813	7.16304	16.8458	119.633	178.486	80.532	3.60004	0.72285	1.01006e-07	7.16384e-07
Methanoperedens_03083	Light-independent protochlorophyllide reductase iron-sulfur ATP-binding protein	0	Uncharacterized ATP-binding protein MJ0685	486.1	CO dehydrogese maturation factor	K07321	283.5	5.4e-85	CO dehydrogese maturation factor	3.4366	0	116.5	130.221	2.38768	0	35.5482	38.4212	19.0893	3.59078	1.33712	0.00169197	0.0056494
Methanoperedens_03034	hypothetical protein	0		592.8	Putative membrane protein					0	0	48.4699	43.4767	0	0	18.4577	16.8728	8.83263	3.58928	2.39978	0.00438513	0.0129819
Methanoperedens_02372	hypothetical protein	0		458	Uncharacterized protein	K06219	26.9	4.8e-07	S-adenosylmethionine-dependent methyltransferase	3.88755	0	122.917	140.81	2.38768	0	33.1555	39.6409	18.796	3.55384	1.34815	0.0018902	0.00620659
Methanoperedens_01883	Imidazolonepropiose	0	Imidazolonepropiose	828.6	Imidazolonepropiose	K01468	577.3	1.4e-173	imidazolonepropiose [EC:3.5.2.7]	0	0	35.1719	32.1439	0	0	18.1159	16.6695	8.69635	3.54662	2.40118	0.00464882	0.0135966
Methanoperedens_00321	Thermosome subunit alpha	0	Thermosome subunit beta	999.2	Thermosome subunit	K22447	825	5.5e-249	archaeal chaperonin	62.0324	60.6233	1815.76	1440.01	95.5072	89.8441	1227.78	1016.23	607.34	3.54557	0.290435	4.81957e-35	1.62775e-33
Methanoperedens_01618	hypothetical protein	0	UPF0219 protein Mbar_A0551	690.3	UPF0219 protein ANME2D_01556	K01641	286.5	8.4e-86	hydroxymethylglutaryl-CoA synthase [EC:2.3.3.10]	12.3797	6.04923	299.418	312.271	11.9384	5.61525	127.153	138.235	70.7354	3.53677	0.653914	2.52285e-08	1.88847e-07
Methanoperedens_01494	hypothetical protein	0		702.2	Putative aminoglycoside phosphotransferase	K07028	22.5	8.1e-06	uncharacterized protein	4.74668	0	114.495	126.081	4.77536	0	50.5878	58.14	28.3758	3.51492	1.04761	0.000347519	0.00138861
Methanoperedens_00967	hypothetical protein	0		372.5	Uncharacterized protein					14.3191	23.3231	574.099	452.157	7.16304	11.2305	126.128	103.676	62.0494	3.51321	0.721098	3.13988e-07	2.07159e-06
Methanoperedens_03204	hypothetical protein	0		1288.5	Uncharacterized protein					1.34242	0	45.0703	43.3872	2.38768	0	35.2064	34.3555	17.9874	3.47963	1.34114	0.00216055	0.00697325
Methanoperedens_00802	hypothetical protein	0		1380.5	Chlor Arch YYY domain					3.61493	2.94402	95.837	109.449	7.16304	5.61525	83.4015	97.3743	48.3885	3.46118	0.786013	3.78857e-06	2.12414e-05
Methanoperedens_02981	GTP 3',8-cyclase	0		675.2	Radical SAM additiol 4Fe4S-binding domain	K22226	170.2	1.5e-50	Fe-coproporphyrin III synthase	7.8821	6.41922	197.832	273.783	7.16304	5.61525	78.958	98.1875	47.4809	3.4241	0.797734	5.85409e-06	3.20001e-05
Methanoperedens_03297	Porphobilinogen deamise	0	Probable porphobilinogen deamise	648.3	Probable porphobilinogen deamise	K01749	380.8	2.4e-114	hydroxymethylbilane synthase [EC:2.5.1.61]	18.6265	0	334.692	345.984	19.1014	0	150.738	162.629	83.1172	3.42204	0.620721	1.39397e-08	1.08052e-07
Methanoperedens_01149	hypothetical protein	0		170.2	PRC domain-containing protein					9.76306	23.8532	474.173	486.009	2.38768	5.61525	50.9296	54.4808	28.3533	3.41643	1.03888	0.000365093	0.00144863
Methanoperedens_02139	50S ribosomal protein L10	0	50S ribosomal protein L10	508.4	50S ribosomal protein L10	K02864	55.9	9.4e-16	large subunit ribosomal protein L10	54.9456	54.9179	1510.96	1182.97	52.5289	50.5373	634.398	518.178	313.911	3.41276	0.354713	1.21312e-22	2.66792e-21
Methanoperedens_00976	hypothetical protein	0		229.9	Uncharacterized protein					87.3711	71.1554	2188.17	1919.08	28.6522	22.461	315.148	288.261	163.631	3.41173	0.429842	6.44084e-16	9.13634e-15
Methanoperedens_00265	Exosome complex component Csl4	0	Exosome complex component Csl4	388.7	Exosome complex component Csl4	K07573	146.2	1.8e-43	exosome complex component CSL4	11.8232	38.5153	563.95	498.52	7.16304	22.461	150.054	138.438	79.5292	3.37736	0.634931	1.90304e-08	1.45917e-07
Methanoperedens_00713	hypothetical protein	0	V-type ATP synthase subunit I	1206.8	V-type ATP synthase subunit I	K02123	542.2	3.8e-163	V/A-type H+/+-transporting ATPase subunit I	23.5383	22.3647	585.672	512.518	42.9782	39.3068	469.646	428.935	245.217	3.36429	0.358067	1.46021e-21	3.06861e-20
Methanoperedens_01356	Threonylcarbamoyl-AMP synthase	0	Threonylcarbamoyl-AMP synthase	392.1	Sua5/YciO/YrdC/YwlC family protein	K07566	222.4	2.3e-66	L-threonylcarbamoyladenylate synthase [EC:2.7.7.87]	0	0	55.161	81.4044	0	0	13.3306	20.532	8.46563	3.35853	2.4754	0.00628206	0.0176808
Methanoperedens_02984	hypothetical protein	0		446.4	Uncharacterized protein	K09149	54.4	2.3e-15	uncharacterized protein	3.75174	0	105.171	124.044	2.38768	0	29.3956	36.185	16.9921	3.35799	1.36311	0.00292417	0.00909635
Methanoperedens_00963	hypothetical protein	0		274.2	Uncharacterized protein					0	14.8871	226.422	174.298	0	5.61525	38.9663	31.3062	18.9719	3.35417	1.37451	0.0025161	0.00798454
Methanoperedens_00977	hypothetical protein	0		183.7	Uncharacterized protein					47.7305	0	949.052	803.244	11.9384	0	104.252	92.2922	52.1206	3.33104	0.740377	2.57151e-06	1.46788e-05
Methanoperedens_00248	hypothetical protein	0		152.5	Uncharacterized protein	K07450	69.7	4e-20	putative resolvase	11.1578	0	345.514	317.097	2.38768	0	32.4719	31.1029	16.4906	3.31116	1.35105	0.00310708	0.00958128
Methanoperedens_01346	hypothetical protein	0		307	Uncharacterized protein					0	0	81.0666	87.1418	0	0	15.0396	16.8728	7.9781	3.29412	2.41623	0.006485	0.0181439
Methanoperedens_02937	Thiamine thiazole synthase	0	Uncharacterized protein in nifH2 3'region (Fragment)	924.9	Flavin containing amine oxidoreductase	K09516	133.8	1.5e-39	all-trans-retinol 13,14-reductase [EC:1.3.99.23]	3.66375	4.47566	115.244	108.545	4.77536	5.61525	65.9692	63.6287	34.9971	3.28895	0.882736	6.71894e-05	0.000316638
Methanoperedens_03526	hypothetical protein	0	Uncharacterized protein MJ1601	318.2	ACT-domain-containing protein, predicted allosteric regulator of homoserine dehydrogese					15.0728	0	307.889	284.64	7.16304	0	64.2602	62.0024	33.3564	3.28091	0.898218	0.000100062	0.000460088
Methanoperedens_02822	hypothetical protein	0		217.6	Uncharacterized protein					0	19.6176	337.628	351.982	0	5.61525	44.0934	27.2404	19.2373	3.28002	1.43725	0.00316996	0.00974343
Methanoperedens_02672	hypothetical protein	0		1150.2	Uncharacterized protein					4.48252	3.65058	111.045	111.293	7.16304	5.61525	77.9326	81.518	43.0572	3.26831	0.783002	1.03509e-05	5.48887e-05
Methanoperedens_03117	D-directed R polymerase subunit B'	0	D-directed R polymerase subunit B'	1204.1	D-directed R polymerase subunit beta	K03044	1042.7	0	D-directed R polymerase subunit B' [EC:2.7.7.6]	25.5615	20.8174	591.11	480.601	42.9782	33.6915	436.491	370.388	220.887	3.26706	0.382902	3.70727e-18	6.11484e-17
Methanoperedens_01127	Respiratory nitrate reductase subunit alpha	0	Perchlorate reductase subunit alpha	2410.6	Nitrate reductase alpha subunit	K00370	619	3e-186	nitrate reductase / nitrite oxidoreductase, alpha subunit [EC:1.7.5.1 1.7.99.-]	107.3	80.1038	2053.85	2074.19	343.826	247.071	2890.34	3045.64	1631.72	3.26392	0.225566	6.32682e-48	3.20521e-46
Methanoperedens_02225	Formylmethanofuran--tetrahydromethanopterin formyltransferase	0	Formylmethanofuran--tetrahydromethanopterin formyltransferase	626.7	Formylmethanofuran--tetrahydromethanopterin formyltransferase	K00672	438.9	1.6e-132	formylmethanofuran--tetrahydromethanopterin N-formyltransferase [EC:2.3.1.101]	32.523	13.2434	594.55	605.617	28.6522	11.2305	230.038	244.757	128.669	3.26342	0.470118	1.44834e-12	1.60506e-11
Methanoperedens_03298	Glutamate-1-semialdehyde 2,1-aminomutase	0	Glutamate-1-semialdehyde 2,1-aminomutase	839.3	Glutamate-1-semialdehyde 2,1-aminomutase	K01845	591.9	2.8e-178	glutamate-1-semialdehyde 2,1-aminomutase [EC:5.4.3.8]	16.2872	9.94826	365.655	301.774	19.1014	11.2305	188.337	162.223	95.2229	3.25814	0.541171	5.47028e-10	4.9741e-09
Methanoperedens_00160	Putative snRNP Sm-like protein	0	Putative snRNP Sm-like protein	142.9	Putative snRNP Sm-like protein	K04796	106.2	7.9e-32	small nuclear ribonucleoprotein	0	29.1539	353.95	381.231	0	5.61525	31.1047	34.9653	17.9213	3.25715	1.36902	0.00302084	0.00935603
Methanoperedens_00527	hypothetical protein	0		613.6	Leucyl aminopeptidase (Aminopeptidase T)	K19689	156.6	2e-46	aminopeptidase [EC:3.4.11.-]	0	13.5425	140.928	135.39	0	11.2305	53.3223	51.4315	28.9961	3.24906	1.10274	0.000649129	0.00243407
Methanoperedens_01579	hypothetical protein	0		255	Retroviral aspartyl protease					0	0	90.3382	115.828	0	0	13.6724	18.0925	7.94122	3.23456	2.44403	0.00709289	0.0196126
Methanoperedens_03522	Aromatic-amino-acid aminotransferase 2	0	Probable N-succinyldiaminopimelate aminotransferase DapC	772.3	Aminotransferase	K23977	548.5	1.6e-165	L-glutamine---4-(methylsulfanyl)-2-oxobutanoate aminotransferase [EC:2.6.1.117]	2.23156	10.9043	135.296	136.373	2.38768	11.2305	63.5766	66.0682	35.8157	3.22445	0.903315	8.9682e-05	0.000414199
Methanoperedens_03475	hypothetical protein	0		853.2	Single-stranded D-specific exonuclease	K07462	158.2	5.9e-47	single-stranded-D-specific exonuclease [EC:3.1.-.-]	13.6994	14.3445	324.703	304.629	16.7138	16.8458	173.981	170.354	94.4737	3.22152	0.52355	2.22558e-10	2.10465e-09
Methanoperedens_01398	tR(fMet)-specific endonuclease VapC	0	Ribonuclease VapC2	285.4	Ribonuclease VapC	K07064	56.5	9.1e-16	uncharacterized protein	5.84455	0	173.363	157.414	2.38768	0	31.1047	29.4766	15.7422	3.22069	1.35716	0.00375894	0.0112967
Methanoperedens_00848	Putative branched-chain-amino-acid aminotransferase	0	Putative branched-chain-amino-acid aminotransferase	585.5	Branched-chain-amino-acid aminotransferase	K00826	254.4	4.2e-76	branched-chain amino acid aminotransferase [EC:2.6.1.42]	5.9048	21.64	277.161	295.589	4.77536	16.8458	98.4411	96.3579	54.105	3.21869	0.730969	2.25341e-06	1.29938e-05
Methanoperedens_01449	GTP-dependent dephospho-CoA kise	0	GTP-dependent dephospho-CoA kise	351.3	GTP-dependent dephospho-CoA kise	K09735	182.8	7e-55	GTP-dependent dephospho-CoA kise [EC:2.7.1.-]	14.3991	23.4534	499.08	363.747	7.16304	11.2305	109.037	82.941	52.5929	3.21548	0.746815	3.91925e-06	2.18876e-05
Methanoperedens_03527	hypothetical protein	0	Homoserine dehydrogese	644.4	Homoserine dehydrogese	K00003	341.9	1.7e-102	homoserine dehydrogese [EC:1.1.1.3]	25.8003	12.6071	471.793	482.109	23.8768	11.2305	191.755	204.506	107.842	3.20246	0.496214	3.81037e-11	3.87456e-10
Methanoperedens_03357	4-hydroxy-tetrahydrodipicolite synthase	0	4-hydroxy-tetrahydrodipicolite synthase	563.5	4-hydroxy-tetrahydrodipicolite synthase	K01714	397.3	1.6e-119	4-hydroxy-tetrahydrodipicolite synthase [EC:4.3.3.7]	32.3652	64.6978	891.935	964.068	26.2645	50.5373	317.883	359.004	188.422	3.20015	0.422497	3.89758e-15	5.34175e-14
Methanoperedens_00949	Ion-translocating oxidoreductase complex subunit C	0	DP-reducing hydrogese subunit HndC	1225.7	4Fe-4S binding protein	K00335	760.4	2.4e-229	DH-quinone oxidoreductase subunit F [EC:7.1.1.2]	8.28761	10.1242	208.01	188.32	14.3261	16.8458	157.916	149.212	84.5751	3.18524	0.551488	2.10171e-09	1.79055e-08
Methanoperedens_03310	DH-quinone oxidoreductase subunit C/D	0	DH-quinone oxidoreductase subunit C	341.7	DH/F420H2 dehydrogese, subunit C	K00332	187.5	9.2e-56	DH-quinone oxidoreductase subunit C [EC:7.1.1.2]	15.3419	0	283.382	284.023	7.16304	0	58.1076	60.5794	31.4625	3.18107	0.904401	0.000159613	0.000692387
Methanoperedens_03381	D-lactate dehydrogese (acceptor)	0	D-lactate dehydrogese [cytochrome], mitochondrial	931.8	FAD/FMN-dependent dehydrogese	K00104	230	9.4e-69	glycolate oxidase [EC:1.1.3.15]	9.37935	9.1663	225.017	198.262	11.9384	11.2305	125.786	115.67	66.1562	3.16809	0.618823	9.18718e-08	6.53233e-07
Methanoperedens_01983	hypothetical protein	0		240.7	Uncharacterized protein					6.81864	0	182.254	189.982	2.38768	0	28.0284	30.6963	15.2781	3.16129	1.36322	0.0042638	0.0126664
Methanoperedens_02183	hypothetical protein	0	Uncharacterized 12.3 kDa protein in fus 3'region	538.9	Putative membrane protein					6.00803	0	103.794	148.983	4.77536	0	36.2318	53.0578	23.5162	3.14946	1.1133	0.00144534	0.00493433
Methanoperedens_01046	hypothetical protein	0	(+)/H(+) antiporter subunit E	314.7	Multisubunit +/H+ antiporter, MnhE subunit	K05569	150.4	1.3e-44	multicomponent +:H+ antiporter subunit E	21.8891	0	354.966	383.207	9.55072	0	68.0201	76.6391	38.5525	3.13773	0.817109	4.25282e-05	0.000206244
Methanoperedens_03251	hypothetical protein	0		1077.8	Putative membrane-associated Zn-dependent protease	K07765	103.2	3e-30	S2P endopeptidase [EC:3.4.24.85]	23.1369	33.917	518.366	553.247	35.8152	50.5373	352.406	387.261	206.505	3.10843	0.374251	1.54223e-17	2.45804e-16
Methanoperedens_00827	Anti-sigma F factor	0	Serine/threonine-protein kise RsbT	258.1	Anti-sigma regulatory factor (Ser/Thr protein kise)	K17752	191.7	2.4e-57	serine/threonine-protein kise RsbT [EC:2.7.11.1]	12.8231	0	236.16	279.869	4.77536	0	38.6245	46.9592	22.5898	3.10454	1.07876	0.00137313	0.00471047
Methanoperedens_01623	Replication factor A	0	Replication factor A	726.9	Single-stranded D-binding protein	K07466	165.6	3.7e-49	replication factor A1	4.58213	0	104.551	78.303	4.77536	0	47.8533	37.2015	22.4575	3.08182	1.08893	0.00153025	0.00518058
Methanoperedens_00534	hypothetical protein	0	Uncharacterized protein MJ0453	175.3	Uncharacterized protein					10.1076	0	200.976	358.597	2.38768	0	20.8504	38.8278	15.5165	3.07227	1.47665	0.00609328	0.0172694
Methanoperedens_03314	F(420)H(2) dehydrogese subunit J	0	F(420)H(2) dehydrogese subunit J	147.5	DH:ubiquinone oxidoreductase subunit 6 (Chain J)	K00339	92	6.9e-27	DH-quinone oxidoreductase subunit J [EC:7.1.1.2]	0	0	138.377	140.81	0	0	14.356	15.2465	7.40063	3.06611	2.42078	0.00845975	0.0229449
Methanoperedens_01572	hypothetical protein	0		290	PINc domain-containing protein	K07065	28.6	2.1e-07	uncharacterized protein	0	0	70.9711	95.0951	0	0	12.647	17.6859	7.58322	3.06539	2.46601	0.00867536	0.0234847
Methanoperedens_02971	hypothetical protein	0	Putative type I restriction enzyme MjaXP M protein	1152.5	Site-specific D-methyltransferase (adenine-specific)	K03427	414.3	2.3e-124	type I restriction enzyme M protein [EC:2.1.1.72]	1.49939	0	35.6781	42.6117	2.38768	0	24.9521	31.1029	14.6107	3.05812	1.38383	0.0053639	0.0154491
Methanoperedens_02452	hypothetical protein	0	Delta-aminolevulinic acid dehydratase	647.5	Delta-aminolevulinic acid dehydratase	K01698	533.5	1.5e-160	porphobilinogen synthase [EC:4.2.1.24]	13.2995	0	185.543	222.826	11.9384	0	73.1472	91.8856	44.2428	3.05317	0.777968	2.67096e-05	0.000134353
Methanoperedens_01930	hypothetical protein	0	Uncharacterized protein y4cC	1059.7	Piwi domain-containing protein					4.94711	0	77.9405	91.5852	7.16304	0	49.5624	60.7827	29.377	3.05297	0.930831	0.000335462	0.00134994
Methanoperedens_00538	hypothetical protein	0		312	Transposase	K07491	69.8	6.8e-20	putative transposase	5.84455	14.2795	203.845	269.232	2.38768	5.61525	36.5736	50.4151	23.7479	3.04375	1.09276	0.00140229	0.00479889
Methanoperedens_03290	Adenosylcobimide-GDP ribazoletransferase	0	Adenosylcobimide-GDP ribazoletransferase	460.3	Adenosylcobimide-GDP ribazoletransferase	K02233	175.1	4.6e-52	adenosylcobimide-GDP ribazoletransferase [EC:2.7.8.26]	0	8.26411	84.8965	104.296	0	5.61525	26.3193	33.9489	16.4709	3.03826	1.40317	0.00474368	0.0138313
Methanoperedens_01191	30S ribosomal protein S3Ae	0	30S ribosomal protein S3Ae	374.8	30S ribosomal protein S3Ae	K02984	204.3	6.4e-61	small subunit ribosomal protein S3Ae	48.7146	75.7401	1138.96	1057.87	26.2645	39.3068	269.688	261.63	149.222	3.02743	0.415424	5.80306e-14	7.1892e-13
Methanoperedens_00645	hypothetical protein	0		693.7	Uncharacterized protein					15.2512	0	225.364	219.547	14.3261	0	92.9722	94.5283	50.4566	3.02394	0.703278	5.75428e-06	3.15152e-05
Methanoperedens_01175	hypothetical protein	0		234.2	Putative transcriptiol regulator	K23356	31.9	1e-08	HTH-type transcriptiol regulator, sugar sensing transcriptiol regulator	0	0	86.6816	103.857	0	0	13.3306	16.0597	7.34755	3.01952	2.43592	0.00897594	0.0242291
Methanoperedens_01619	hypothetical protein	0	Uncharacterized HTH-type transcriptiol regulator MJ1545	509.6	Putative transcriptiol regulator	K07731	314.2	7.9e-95	putative transcriptiol regulator	18.9518	0	267.693	282.794	14.3261	0	88.8705	97.9842	50.2952	3.01735	0.710308	7.07074e-06	3.8209e-05
Methanoperedens_00728	hypothetical protein	0	UPF0111 protein YkaA	407.5	Phosphate transport regulator related to PhoU	K07220	207.1	8.6e-62	uncharacterized protein	0	9.99563	122.688	98.0307	0	5.61525	31.4465	27.2404	16.0755	3.00979	1.38848	0.00491608	0.0142606
Methanoperedens_00374	Digeranylgeranylglycerophospholipid reductase	0	Digeranylgeranylglycerophospholipid reductase	763.5	Geranylgeranyl reductase family protein	K17830	255.6	1.6e-76	digeranylgeranylglycerophospholipid reductase [EC:1.3.1.101 1.3.7.11]	6.91004	5.62757	129.888	155.734	7.16304	5.61525	59.133	73.9964	36.4769	2.9663	0.817318	7.95362e-05	0.000371737
Methanoperedens_02376	Tetrahydromethanopterin S-methyltransferase subunit A 1	0	Tetrahydromethanopterin S-methyltransferase subunit A	461.1	Tetrahydromethanopterin S-methyltransferase subunit A	K00577	263.2	5.6e-79	tetrahydromethanopterin S-methyltransferase subunit A [EC:2.1.1.86]	60.6039	34.8396	900.57	993.267	40.5905	22.461	264.902	304.93	158.221	2.96003	0.414482	2.79206e-13	3.27317e-12
Methanoperedens_02941	hypothetical protein	0		254.6	PLDc_N domain-containing protein					5.40345	0	142.666	132.486	2.38768	0	27.6866	25.0043	13.7696	2.9513	1.37795	0.00643861	0.0180676
Methanoperedens_03113	Transcription termition/antitermition protein NusA	0	Probable transcription termition protein NusA	297	Probable transcription termition protein NusA	K02600	70.3	2.6e-20	transcription termition/antitermition protein NusA	17.4152	0	270.587	288.978	7.16304	0	48.8788	54.4808	27.6307	2.95115	0.923674	0.000452908	0.0017674
Methanoperedens_03412	hypothetical protein	0		508.8	Eight transmembrane protein EpsH, putative exosortase					18.9518	7.71722	272.841	340.878	14.3261	5.61525	90.2377	118.11	57.0722	2.95039	0.670566	2.96666e-06	1.67992e-05
Methanoperedens_01524	Inosine-5'-monophosphate dehydrogese	0	Uncharacterized protein MJ1225	538.5	Putative transcriptiol regulator	K07168	69	6e-20	CBS domain-containing membrane protein	8.9185	36.3163	386.641	346.228	7.16304	28.0763	136.382	121.972	73.3983	2.94992	0.652073	7.42476e-07	4.6499e-06
Methanoperedens_02093	50S ribosomal protein L10e	0	50S ribosomal protein L10e	338.6	50S ribosomal protein L10e	K02866	176.7	1.5e-52	large subunit ribosomal protein L10e	59.2516	72.3822	1133.07	1162.04	28.6522	33.6915	240.634	257.564	140.135	2.94649	0.415194	2.84158e-13	3.31751e-12
Methanoperedens_02431	hypothetical protein	0		1082	HD domain-containing protein	K19076	65.7	7.6e-19	CRISPR-associated protein Cmr2	1.55361	3.79581	55.1994	61.179	2.38768	5.61525	37.2572	43.0968	22.0892	2.93815	1.06982	0.0017058	0.00568001
Methanoperedens_02504	hypothetical protein	0	30S ribosomal protein S3	516.9	30S ribosomal protein S3	K02982	161.2	6.4e-48	small subunit ribosomal protein S3	46.5979	85.3864	1227.47	930.461	38.2029	67.383	441.96	349.856	224.35	2.92681	0.41018	9.02098e-14	1.09839e-12
Methanoperedens_03316	F(420)H(2) dehydrogese subunit K	0	F(420)H(2) dehydrogese subunit K	179.5	DH:ubiquinone oxidoreductase subunit 11 or 4L (Chain K)	K00340	122.8	1.6e-36	DH-quinone oxidoreductase subunit K [EC:7.1.1.2]	8.50642	0	188.547	225.947	2.38768	0	23.243	29.07	13.6752	2.92407	1.39353	0.00691786	0.0192223
Methanoperedens_03289	Adenosylcobimide-phosphate guanylyltransferase	0	Adenosylcobimide-phosphate guanylyltransferase	422.9	GTP:adenosylcobimide-phosphate guanylyltransferase	K19712	197.6	4.2e-59	adenosylcobimide-phosphate guanylyltransferase [EC:2.7.7.62]	0	0	52.8393	56.4569	0	0	13.6724	14.6366	7.07726	2.9223	2.42895	0.00995197	0.0264857
Methanoperedens_00110	GDP-L-fucose synthase	0	CDP-paratose 2-epimerase	713.4	Nucleoside-diphosphate-sugar epimerase	K12454	363.8	1.5e-109	CDP-paratose 2-epimerase [EC:5.1.3.10]	9.68055	0	138.841	145.649	9.55072	0	59.8167	65.8649	33.8081	2.91422	0.829048	0.000139892	0.000624016
Methanoperedens_02956	(R)-citramalate synthase CimA	0	Putative (R)-citramalate synthase CimA	908.3	Putative (R)-citramalate synthase CimA	K09011	635.5	1e-191	(R)-citramalate synthase [EC:2.3.1.182]	43.5932	44.3781	735.941	772.958	57.3043	56.1525	424.869	465.73	251.014	2.91206	0.323801	5.2302e-20	9.6981e-19
Methanoperedens_02962	putative NOP5 family protein	0	Uncharacterized NOP5 family protein MJ0694	574.7	rR biogenesis protein	K14564	227.3	8.6e-68	nucleolar protein 56	0	7.06762	97.1211	71.464	0	5.61525	35.2064	23.378	16.0499	2.9103	1.4451	0.0061491	0.0174021
Methanoperedens_02380	Tetrahydromethanopterin S-methyltransferase subunit E	0	Tetrahydromethanopterin S-methyltransferase subunit E	569.3	Tetrahydromethanopterin S-methyltransferase subunit E	K00581	436.6	7.7e-132	tetrahydromethanopterin S-methyltransferase subunit E [EC:2.1.1.86]	63.215	91.2645	1221.35	1278.28	52.5289	72.9983	445.72	487.075	264.58	2.90954	0.328407	1.06182e-19	1.93101e-18
Methanoperedens_02375	Tetrahydromethanopterin S-methyltransferase subunit F	0	Tetrahydromethanopterin S-methyltransferase subunit F	138.3	Tetrahydromethanopterin S-methyltransferase	K00582	92.9	1.1e-27	tetrahydromethanopterin S-methyltransferase subunit F [EC:2.1.1.86]	11.7692	0	234.013	347.589	2.38768	0	20.8504	32.3226	13.8902	2.90422	1.43796	0.00761692	0.0209392
Methanoperedens_01718	hypothetical protein	0		224.9	Robl_LC7 domain-containing protein	K07131	69.1	7.1e-20	uncharacterized protein	13.9699	0	243.619	250.406	4.77536	0	36.5736	39.2343	20.1458	2.90379	1.07854	0.00232605	0.00743969
Methanoperedens_03309	F(420)H(2) dehydrogese subunit B	0	DH-quinone oxidoreductase subunit B	406.4	DH-quinone oxidoreductase, B subunit	K00331	304.5	2.5e-91	DH-quinone oxidoreductase subunit B [EC:7.1.1.2]	17.3565	31.8043	448.36	386.067	9.55072	16.8458	108.354	97.3743	58.0311	2.88812	0.635757	1.25974e-06	7.53986e-06
Methanoperedens_02949	[LysW]-aminoadipate/[LysW]-glutamate kise	0	Acetylglutamate kise	570.1	Acetylglutamate kise	K00930	418.3	7.2e-126	acetylglutamate kise [EC:2.7.2.8]	23.299	7.11554	358.842	310.514	19.1014	5.61525	129.204	116.687	67.6518	2.88276	0.586165	2.74445e-07	1.832e-06
Methanoperedens_00047	hypothetical protein	0		546.2	Glycosyl transferase	K16555	101.9	9.5e-30	succinoglycan biosynthesis protein ExoO [EC:2.4.-.-]	0	0	40.2876	38.6364	0	0	14.0142	13.8235	6.95942	2.86933	2.42839	0.0105231	0.0277711
Methanoperedens_02138	50S ribosomal protein L1	0	50S ribosomal protein L1	416.4	50S ribosomal protein L1	K02863	153.2	1.7e-45	large subunit ribosomal protein L1	108.397	49.044	1536.34	1410.91	64.4673	28.0763	401.284	384.618	219.612	2.85767	0.374994	8.57908e-15	1.1535e-13
Methanoperedens_02501	50S ribosomal protein L2	0	50S ribosomal protein L2	480.3	50S ribosomal protein L2	K02886	203	1.7e-60	large subunit ribosomal protein L2	47.1263	53.1413	893.319	768.297	31.0398	33.6915	258.408	231.95	138.772	2.84701	0.413006	1.21199e-12	1.35371e-11
Methanoperedens_03220	hypothetical protein	0		807	Uncharacterized protein					0	0	22.8337	31.3812	0	0	11.6215	16.8728	7.12358	2.83708	2.48477	0.0110711	0.0290167
Methanoperedens_02025	hypothetical protein	0		194.1	Nucleotidyltransferase family protein	K07076	44.8	2.4e-12	uncharacterized protein	0	0	141.384	85.2153	0	0	17.7741	11.1808	7.23872	2.82506	2.51024	0.0112467	0.0293802
Methanoperedens_01537	F420-dependent methylenetetrahydromethanopterin dehydrogese	0	F420-dependent methylenetetrahydromethanopterin dehydrogese	530.8	F420-dependent methylenetetrahydromethanopterin dehydrogese	K00319	427.2	4.9e-129	methylenetetrahydromethanopterin dehydrogese [EC:1.5.98.1]	43.4227	68.2013	818.914	919.486	33.4275	50.5373	276.866	313.265	168.524	2.82361	0.394781	1.28634e-13	1.52692e-12
Methanoperedens_02169	hypothetical protein	0		671	ClpP class periplasmic serine protease					30.3229	12.3475	393.715	437.45	28.6522	11.2305	163.385	189.463	98.1827	2.81964	0.499902	5.08591e-09	4.13525e-08
Methanoperedens_03387	hypothetical protein	0		710.3	Uncharacterized protein					2.37991	5.81464	69.8181	102.117	2.38768	5.61525	30.7629	46.9592	21.4313	2.81285	1.1281	0.00286421	0.0089294
Methanoperedens_02986	hypothetical protein	0	Uncharacterized protein MJ0678	585.1	TIGR00341 family protein					5.11398	12.4945	139.191	151.511	4.77536	11.2305	57.0822	64.8485	34.4841	2.78176	0.817607	0.00015584	0.00067832
Methanoperedens_00727	hypothetical protein	0	Probable low-affinity inorganic phosphate transporter	620.2	Phosphate/sulfate permease	K03306	370.8	2.2e-111	inorganic phosphate transporter, PiT family	0	6.22873	61.4943	68.6641	0	5.61525	25.2939	26.8338	14.4358	2.77508	1.39909	0.00749096	0.0206329
Methanoperedens_00419	hypothetical protein	0		179.9	Uncharacterized protein					9.76306	0	225.948	208.548	2.38768	0	24.2685	23.378	12.5085	2.75763	1.3877	0.00912984	0.0245743
Methanoperedens_00163	hypothetical protein	0	Uncharacterized ZPR1-like protein PH1223	394	ZPR1-related zinc finger protein	K06874	114.1	1.1e-33	zinc finger protein	13.2177	0	189.571	184.955	7.16304	0	45.1188	46.1461	24.607	2.74735	0.932232	0.000982526	0.00349301
Methanoperedens_03118	D-directed R polymerase subunit B''	0	D-directed R polymerase subunit B''	1048.9	D-directed R polymerase	K03045	793.3	1.2e-239	D-directed R polymerase subunit B" [EC:2.7.7.6]	35.5956	31.6246	554.295	503.399	52.5289	44.922	359.242	340.302	199.249	2.7433	0.338947	1.50427e-16	2.258e-15
Methanoperedens_03291	hypothetical protein	0		396.7	Alpha-ribazole phosphatase CobZ					0	0	50.5453	54.4924	0	0	12.647	14.2301	6.71926	2.7384	2.43687	0.0120769	0.0312042
Methanoperedens_00832	Ribose-phosphate pyrophosphokise	0	Ribose-phosphate pyrophosphokise	542.3	Ribose-phosphate pyrophosphokise	K00948	236.4	1.1e-70	ribose-phosphate pyrophosphokise [EC:2.7.6.1]	6.02912	0	88.4363	106.95	4.77536	0	30.7629	38.8278	18.5915	2.7368	1.10893	0.00394812	0.0118402
Methanoperedens_03119	D-directed R polymerase subunit H	0	D-directed R polymerase subunit H	164.9	D-directed R polymerase subunit H	K03053	114.1	3.5e-34	D-directed R polymerase subunit H [EC:2.7.7.6]	29.9703	0	403.791	443.498	7.16304	0	42.3844	48.5855	24.5332	2.73665	0.941489	0.00108476	0.00384202
Methanoperedens_01673	Type 2 D topoisomerase 6 subunit B	0	Type 2 D topoisomerase 6 subunit B	1223.4	Type 2 D topoisomerase 6 subunit B	K03167	753.3	3.9e-227	D topoisomerase VI subunit B [EC:5.6.2.2]	19.4945	27.2166	341.777	342.448	33.4275	44.922	257.383	268.948	151.17	2.73585	0.386893	2.94323e-13	3.4221e-12
Methanoperedens_00975	hypothetical protein	0		305.1	Uncharacterized protein					56.523	69.0488	963.587	959.609	23.8768	28.0763	178.766	185.397	104.029	2.73565	0.451503	3.23039e-10	2.99497e-09
Methanoperedens_01212	O-phospho-L-seryl-tR:Cys-tR synthase	0	O-phospho-L-seryl-tR:Cys-tR synthase 2	831.6	O-phospho-L-seryl-tR:Cys-tR synthase	K06868	577	2.9e-174	Sep-tR:Cys-tR synthetase [EC:2.5.1.73]	12.9846	0	172.12	144.31	14.3261	0	83.4015	72.9799	42.6769	2.73408	0.736612	5.96367e-05	0.000283399
Methanoperedens_01936	putative molybdopterin synthase	0	Probable molybdopterin synthase	542.7	Molybdopterin synthase subunit MoaE	K03635	144.8	7.1e-43	molybdopterin synthase catalytic subunit [EC:2.8.1.12]	12.6345	7.71722	184.296	215.909	9.55072	5.61525	61.1839	74.8095	37.7898	2.72298	0.754426	8.35253e-05	0.000388461
Methanoperedens_03080	hypothetical protein	0		1451.4	Uncharacterized protein					5.7661	0	64.6554	79.0427	11.9384	0	58.7912	75.0128	36.4356	2.71663	0.805125	0.000202138	0.000848443
Methanoperedens_00173	hypothetical protein	0		572.8	Prophage antirepressor	K14623	119.9	3.2e-35	D-damage-inducible protein D	9.07552	0	127.205	125.87	7.16304	0	44.0934	45.5362	24.1982	2.71613	0.934554	0.001106	0.00390263
Methanoperedens_03361	Phosphoribosylamine--glycine ligase	0	Phosphoribosylamine--glycine ligase	909.1	Phosphoribosylamine--glycine ligase	K01945	420.7	1.4e-126	phosphoribosylamine---glycine ligase [EC:6.3.4.13]	26.5521	64.8723	642.318	617.907	33.4275	78.6135	355.824	356.565	206.107	2.71505	0.43217	2.69267e-11	2.77785e-10
Methanoperedens_02920	hypothetical protein	0	Uncharacterized protein MJ0038	400.2	Putative R-binding protein	K07572	290.2	2.3e-87	putative nucleotide binding protein	43.6116	63.9315	801.763	761.471	23.8768	33.6915	192.781	191.09	110.36	2.7125	0.441945	1.74587e-10	1.66769e-09
Methanoperedens_02092	hypothetical protein	0	Translation initiation factor 2 subunit beta	405.2	Translation initiation factor 2 subunit beta	K03238	161	1e-47	translation initiation factor 2 subunit 2	54.2181	61.1383	811.596	929.621	31.0398	33.6915	204.06	244.147	128.235	2.70759	0.430601	6.70761e-11	6.70053e-10
Methanoperedens_01610	ADP-L-glycero-D-manno-heptose-6-epimerase	0	Putative UDP-glucose 4-epimerase	605.5	Nucleoside-diphosphate-sugar epimerase	K01784	307.8	4.1e-92	UDP-glucose 4-epimerase [EC:5.1.3.2]	22.4614	6.85975	299.267	272.233	19.1014	5.61525	111.772	106.116	60.651	2.70034	0.58957	1.42115e-06	8.36644e-06
Methanoperedens_03394	Trigger factor	0	Short-type peptidyl-prolyl cis-trans isomerase	451.8	Peptidyl-prolyl cis-trans isomerase	K09569	83.4	4e-24	FK506-binding protein 2 [EC:5.2.1.8]	36.4303	59.338	699.626	640.595	28.6522	44.922	241.659	230.934	136.542	2.69589	0.409499	7.92685e-12	8.45431e-11
Methanoperedens_02948	GTP cyclohydrolase MptA	0	GTP cyclohydrolase MptA	609.8	GTP cyclohydrolase MptA	K17488	440.4	6.8e-133	GTP cyclohydrolase IV [EC:3.5.4.39]	21.682	13.2434	291.533	309.605	19.1014	11.2305	112.797	125.021	67.0376	2.67666	0.553223	3.74592e-07	2.44865e-06
Methanoperedens_02202	Aromatic-amino-acid aminotransferase 2	0	Putative aminotransferase YugH	782.7	Aminotransferase	K10907	592	1e-178	aminotransferase [EC:2.6.1.-]	13.3201	27.1199	317.677	263.913	14.3261	28.0763	150.054	123.598	79.0138	2.67332	0.555244	2.47644e-07	1.66092e-06
Methanoperedens_01970	hypothetical protein	0		714.9	Uncharacterized protein					6.89157	11.225	134.034	156.171	7.16304	11.2305	61.1839	73.5898	38.2918	2.66986	0.751619	8.97893e-05	0.000414199
Methanoperedens_02205	hypothetical protein	0	Putative type I restriction enzyme MpnORFDP M protein	1589.3	Site-specific D-methyltransferase (adenine-specific)	K03427	186.5	2e-55	type I restriction enzyme M protein [EC:2.1.1.72]	2.16138	0	33.8171	33.1214	4.77536	0	32.8137	33.5423	17.7828	2.66902	1.09249	0.00438831	0.0129819
Methanoperedens_03108	Glutamate--tR ligase	0	Glutamate--tR ligase	1165.2	Glutamate--tR ligase	K01886	280.6	5.4e-84	glutaminyl-tR synthetase [EC:6.1.1.18]	6.01856	7.35231	112.804	101.732	9.55072	11.2305	78.6162	73.9964	43.3484	2.65358	0.679859	2.48208e-05	0.000125744
Methanoperedens_01213	hypothetical protein	0		670.6	Uncharacterized protein					5.06873	12.384	137.133	141.226	4.77536	11.2305	56.7404	54.6841	31.8576	2.63874	0.817612	0.000294233	0.00119762
Methanoperedens_03389	hypothetical protein	0		727.2	DUF362 domain-containing protein	K07138	27.6	3.1e-07	uncharacterized protein	21.8428	23.7185	318.812	352.529	21.4891	22.461	137.749	159.783	85.3707	2.62946	0.496982	2.87062e-08	2.13193e-07
Methanoperedens_01829	hypothetical protein	0		464.5	Uncharacterized protein					3.7848	0	78.9563	78.7379	2.38768	0	21.8758	22.7681	11.7579	2.62725	1.39626	0.0114469	0.0297936
Methanoperedens_02374	hypothetical protein	0	Tetrahydromethanopterin S-methyltransferase subunit G	166.8	Tetrahydromethanopterin S-methyltransferase subunit G	K00583	101.5	3.2e-30	tetrahydromethanopterin S-methyltransferase subunit G [EC:2.1.1.86]	0	0	102.684	132.987	0	0	11.2797	15.2465	6.63155	2.62618	2.46715	0.01356	0.0342563
Methanoperedens_02245	Vitamin B12 import ATP-binding protein BtuD	0	Putative ABC transporter ATP-binding protein MA_4021	479.9	ABC-type cobalt transport system, ATPase component	K02006	321.7	1.9e-96	cobalt/nickel transport system ATP-binding protein	62.4836	53.4312	739.327	972.598	47.7536	39.3068	248.154	340.505	168.93	2.62054	0.420824	9.71467e-11	9.50362e-10
Methanoperedens_03375	1,4-dihydroxy-2-phthoate octaprenyltransferase	0		546.6	1,4-dihydroxy-2-phthoate octaprenyltransferase	K02548	86	4.7e-25	1,4-dihydroxy-2-phthoate polyprenyltransferase [EC:2.5.1.74]	0	7.18864	68.0939	65.5828	0	5.61525	24.2685	24.1911	13.5187	2.62012	1.4083	0.00975956	0.0260714
Methanoperedens_00714	hypothetical protein	0		117.1	ATP synthase, H subunit	K02107	42.4	1.5e-11	V/A-type H+/+-transporting ATPase subunit G/H	7.8821	19.2576	282.618	218.148	2.38768	5.61525	37.599	30.2897	18.9729	2.61945	1.09568	0.00419114	0.0124767
Methanoperedens_02955	3D-(3,5/4)-trihydroxycyclohexane-1,2-dione hydrolase	0	Probable acetolactate synthase large subunit	1108.6	Acetolactate synthase	K01652	815.6	8.3e-246	acetolactate synthase I/II/III large subunit [EC:2.2.1.6]	47.56	74.9673	839.645	766.008	74.0181	112.305	573.898	546.231	326.613	2.61849	0.300921	3.45121e-19	5.97018e-18
Methanoperedens_02342	hypothetical protein	0	UPF0284 protein Mbar_A0178	672.9	UPF0284 protein ANME2D_00526					15.0288	12.2396	234.326	202.854	14.3261	11.2305	98.0993	88.633	53.0722	2.59719	0.606631	5.04584e-06	2.77962e-05
Methanoperedens_01648	Regulator of RpoS	0	Alkaline phosphatase synthesis transcriptiol regulatory protein PhoP	337	Response regulator with CheY-like receiver domain and winged-helix D-binding domain	K07658	170.5	7.2e-51	two-component system, OmpR family, alkaline phosphatase synthesis response regulator PhoP	4.85395	0	93.3494	106.39	2.38768	0	20.1668	23.9878	11.6356	2.59349	1.40828	0.0122405	0.0315535
Methanoperedens_03378	hypothetical protein	0		427.2	CAAX amino termil protease family	K07052	59.2	7.1e-17	uncharacterized protein	23.1161	9.41293	290.095	303.426	14.3261	5.61525	78.958	84.5673	45.8666	2.58997	0.65169	2.06529e-05	0.000106146
Methanoperedens_00710	V-type ATP synthase subunit C	0	V-type ATP synthase subunit C	661	V-type ATP synthase subunit C	K02119	321.7	1.3e-96	V/A-type H+/+-transporting ATPase subunit C	101.076	172.866	1793.96	1708.03	95.5072	157.227	744.461	739.354	434.137	2.58145	0.302098	1.08171e-18	1.83762e-17
Methanoperedens_00582	Cytochrome c biogenesis protein CcsA	0	Heme exporter protein C	438.7	ABC-type transport system involved in cytochrome c biogenesis, permease component	K02195	234.2	6.1e-70	heme exporter protein C	18.7587	18.3326	276.38	301.748	11.9384	11.2305	77.2489	88.0231	47.1102	2.57945	0.645822	1.69059e-05	8.75218e-05
Methanoperedens_02951	Vitamin B12 import ATP-binding protein BtuD	0	Uncharacterized ABC transporter ATP-binding protein MJ0719	1147.9	Putative ATPase, Rse L inhibitor (RLI) like protein	K06174	871.8	1.3e-262	ATP-binding cassette, sub-family E, member 1	13.0394	17.6988	202.598	216.099	21.4891	28.0763	146.636	163.239	89.8602	2.57804	0.478478	1.56047e-08	1.20628e-07
Methanoperedens_02883	hypothetical protein	0	Phosphate transport system permease protein PstC	541.6	Phosphate transport system permease protein	K02037	321	3.9e-96	phosphate transport system permease protein	8.36833	0	107.291	113.471	7.16304	0	40.3335	42.0803	22.3942	2.57414	0.945056	0.00187197	0.00616101
Methanoperedens_00895	Alpha-aminoadipate--LysW ligase LysX	0	Tetrahydromethanopterin:alpha-L-glutamate ligase	589.7	Glutathione synthase/ribosomal protein S6 modification enzyme (Glutaminyl transferase)	K14940	96.3	3.3e-28	gamma-F420-2:alpha-L-glutamate ligase [EC:6.3.2.32]	0	0	27.0391	50.6269	0	0	9.57067	18.7024	7.06826	2.56965	2.59572	0.0143736	0.0360136
Methanoperedens_02042	Ketol-acid reductoisomerase (D(P)(+))	0	Ketol-acid reductoisomerase (DP(+))	667.2	Ketol-acid reductoisomerase (DP(+))	K00053	499.9	2.6e-150	ketol-acid reductoisomerase [EC:1.1.1.86]	36.2292	31.6127	471.527	499.424	33.4275	28.0763	191.071	211.418	115.998	2.56867	0.419763	2.44742e-10	2.29153e-09
Methanoperedens_00989	Minichromosome maintence protein MCM	0	Minichromosome maintence protein MCM	1309.3	Putative ATPase involved in replication control, Cdc46/Mcm family	K10726	647.7	4.4e-195	replicative D helicase Mcm [EC:3.6.4.-]	16.695	9.41293	210.978	193.697	31.0398	16.8458	172.272	165.069	96.3066	2.56194	0.456137	5.8427e-09	4.72244e-08
Methanoperedens_03111	30S ribosomal protein S7	0	30S ribosomal protein S7	365.5	30S ribosomal protein S7	K02992	116.6	2.3e-34	small subunit ribosomal protein S7	59.7269	78.5753	925.507	901.185	31.0398	39.3068	211.238	214.467	124.013	2.55997	0.403583	4.85922e-11	4.88851e-10
Methanoperedens_02594	hypothetical protein	0		1015.4	Uncharacterized protein					8.35748	4.08382	101.34	119.844	11.9384	5.61525	63.5766	78.4687	39.8997	2.55877	0.712793	8.86883e-05	0.000411126
Methanoperedens_00268	hypothetical protein	0		326.6	Uncharacterized protein					16.109	26.2385	302.802	323.159	7.16304	11.2305	59.133	65.8649	35.8479	2.55827	0.746119	0.000147833	0.000652099
Methanoperedens_02498	50S ribosomal protein L3	0	50S ribosomal protein L3	674.5	50S ribosomal protein L3	K02906	143.9	1.6e-42	large subunit ribosomal protein L3	56.2538	56.2254	811.807	714.808	52.5289	50.5373	332.922	305.947	185.484	2.55535	0.340507	1.4471e-14	1.90066e-13
Methanoperedens_00581	hypothetical protein	0		411.8	ABC-type transport system involved in cytochrome c biogenesis, permease component	K02194	174.7	4.8e-52	heme exporter protein B	29.8834	27.3793	392.068	450.307	19.1014	16.8458	110.063	131.933	69.4857	2.5523	0.542464	6.29033e-07	3.99232e-06
Methanoperedens_02988	hypothetical protein	0	UPF0053 protein sll0260	830.1	CBS domain-containing protein	K03699	564.6	6.5e-170	putative hemolysin	1.95706	0	36.9995	48.3481	2.38768	0	19.8249	23.378	11.3977	2.55016	1.40977	0.0131343	0.0333589
Methanoperedens_00826	hypothetical protein	0	RsbT antagonist protein RsbS	225.7	Anti-anti-sigma regulatory factor (Antagonist of anti-sigma factor)	K17762	148.2	2.2e-44	rsbT antagonist protein RsbS	14.0844	68.8224	553.21	485.295	4.77536	22.461	82.3761	75.4194	46.258	2.54102	0.752849	0.00010754	0.000490499
Methanoperedens_00793	H(2):CoB-CoM heterodisulfide,ferredoxin reductase subunit B	1	H(2):CoB-CoM heterodisulfide,ferredoxin reductase subunit B	594.7	Heterodisulfide reductase, subunit B	K03389	360.7	2.4e-108	heterodisulfide reductase subunit B2 [EC:1.8.7.3 1.8.98.4 1.8.98.5 1.8.98.6]	44.286	86.5601	788.177	811.086	35.8152	67.383	279.942	300.661	170.95	2.53421	0.394402	1.6176e-11	1.69967e-10
Methanoperedens_01392	hypothetical protein	0		637.5	Biotin synthetase-like uncharacterized protein	K09711	291.7	1e-87	lipoyl synthase	2.71025	6.62171	83.9261	77.5271	2.38768	5.61525	32.4719	31.3062	17.9452	2.53076	1.08393	0.00505022	0.014605
Methanoperedens_02586	Ditrans,polycis-undecaprenyl-diphosphate synthase ((2E,6E)-farnesyl-diphosphate specific)	0	Tritrans,polycis-undecaprenyl-diphosphate synthase (geranylgeranyl-diphosphate specific)	644.8	Tritrans,polycis-undecaprenyl-diphosphate synthase (geranylgeranyl-diphosphate specific)	K15888	360.4	8.9e-109	tritrans,polycis-undecaprenyl-diphosphate synthase [geranylgeranyl-diphosphate specific] [EC:2.5.1.89]	5.45491	6.66376	102.24	104.87	4.77536	5.61525	39.3081	42.0803	22.9448	2.51432	0.921618	0.0017049	0.00568001
Methanoperedens_02499	50S ribosomal protein L4	0	50S ribosomal protein L4	475.7	50S ribosomal protein L4	K02930	270.4	6.9e-81	large subunit ribosomal protein L4e	78.7268	75.2659	1145.85	906.01	54.9166	50.5373	351.038	289.684	186.544	2.50835	0.361654	8.80217e-13	1.00288e-11
Methanoperedens_00592	2-isopropylmalate synthase	0	Probable 2-isopropylmalate synthase	988.8	Isopropylmalate/citramalate/homocitrate synthase	K01649	506.4	2.5e-152	2-isopropylmalate synthase [EC:2.3.3.13]	75.3639	49.1014	806.845	891.871	107.446	67.383	505.194	582.823	315.712	2.50159	0.31524	6.11885e-16	8.72321e-15
Methanoperedens_02067	Pyrroline-5-carboxylate reductase	0	Pyrroline-5-carboxylate reductase	515	Pyrroline-5-carboxylate reductase	K00286	389	9.3e-117	pyrroline-5-carboxylate reductase [EC:1.5.1.2]	6.27116	7.66089	116.516	119.397	4.77536	5.61525	38.9663	41.6738	22.7577	2.49866	0.922325	0.00180242	0.00595976
Methanoperedens_01320	hypothetical protein	0	Aminopeptidase S	1477.2	Putative subtilisin-like proprotein convertase	K14647	192.4	2.6e-57	minor extracellular serine protease Vpr [EC:3.4.21.-]	16.4994	8.6382	202.449	172.501	33.4275	16.8458	180.134	160.393	97.7	2.49189	0.460539	1.82757e-08	1.4051e-07
Methanoperedens_03233	N(1)-aminopropylagmatine ureohydrolase	0	Agmatise	579.3	Agmatise	K01480	287.6	2.9e-86	agmatise [EC:3.5.3.11]	14.9678	21.9416	274.194	235.207	11.9384	16.8458	96.0485	82.3311	51.7909	2.49138	0.618148	1.27584e-05	6.72779e-05
Methanoperedens_01196	Aspartate-semialdehyde dehydrogese	0	Aspartate-semialdehyde dehydrogese	686	Aspartate-semialdehyde dehydrogese	K00133	311.6	2.1e-93	aspartate-semialdehyde dehydrogese [EC:1.2.1.11]	75.1442	140.755	1334.11	1199.91	71.6304	129.151	558.175	524.276	320.808	2.45605	0.342095	6.83339e-14	8.42884e-13
Methanoperedens_00711	V-type ATP synthase subunit E	0	V-type ATP synthase subunit E	316.6	V-type proton ATPase subunit E	K02121	111.1	1.4e-32	V/A-type H+/+-transporting ATPase subunit E	182.102	182.529	2400.2	2112.77	93.1195	89.8441	539.034	495.613	304.403	2.44658	0.275512	1.49811e-19	2.67304e-18
Methanoperedens_00246	hypothetical protein	0	Uncharacterized protein MJ1451	1022.7	Putative methanogenesis marker protein 14					86.0804	80.8895	1047.35	1017.78	124.159	112.305	663.452	672.879	393.199	2.44289	0.243519	2.78321e-24	6.7487e-23
Methanoperedens_01147	Cell division protein FtsZ	0	Cell division protein FtsZ 1	686.4	Cell division protein FtsZ	K03531	446.6	1.9e-134	cell division protein FtsZ	33.0442	17.3001	372.372	351.613	33.4275	16.8458	165.436	163.036	94.6862	2.4414	0.451572	1.95428e-08	1.49442e-07
Methanoperedens_02451	hypothetical protein	0		286.6	Uncharacterized metal-binding protein					0	0	52.9821	97.0449	0	0	9.57067	17.0761	6.66169	2.44025	2.54617	0.016094	0.0394785
Methanoperedens_00573	hypothetical protein	0		228.4	Putative Fe-S oxidoreductase	K06940	38.1	1.9e-10	uncharacterized protein	0	0	91.6972	127.103	0	0	12.647	11.9939	6.16022	2.43811	2.4182	0.0161238	0.0395018
Methanoperedens_02820	Proteasome-activating nucleotidase 1	0	Proteasome-activating nucleotidase 1	771.5	26S proteasome subunit P45 family	K03420	546.7	6.4e-165	proteasome regulatory subunit	204.154	124.698	2101.75	2119.24	229.217	134.766	1036.37	1090.43	622.695	2.4366	0.294277	3.45763e-17	5.33114e-16
Methanoperedens_02085	Imidazole glycerol phosphate synthase subunit HisF	0	Imidazole glycerol phosphate synthase subunit HisF	552	Imidazole glycerol phosphate synthase subunit HisF	K02500	456.5	2.8e-137	imidazole glycerol-phosphate synthase subunit HisF [EC:4.3.2.10]	15.5081	22.7338	258.817	235.057	11.9384	16.8458	87.5032	82.7377	49.7563	2.42913	0.609168	1.61524e-05	8.37738e-05
Methanoperedens_01690	Bifunctiol protein GlmU	0	Glucose-1-phosphate thymidylyltransferase	671	dTDP-glucose pyrophosphorylase	K00973	198.7	3.3e-59	glucose-1-phosphate thymidylyltransferase [EC:2.7.7.24]	28.2109	6.26592	264.165	297.733	26.2645	5.61525	108.012	127.054	66.7364	2.42891	0.580865	8.09792e-06	4.35935e-05
Methanoperedens_03018	hypothetical protein	0		977.6	Uncharacterized protein					13.5033	0	133.147	126.351	19.1014	0	82.7179	80.9081	45.6819	2.42612	0.701988	0.000148517	0.000653243
Methanoperedens_02929	hypothetical protein	0		274.6	Nucleoside 2-deoxyribosyltransferase	K08728	53.6	4e-15	nucleoside deoxyribosyltransferase [EC:2.4.2.6]	0	0	73.0561	69.3848	0	0	12.3051	12.1972	6.12559	2.42051	2.41548	0.0163909	0.040087
Methanoperedens_02503	50S ribosomal protein L22	0	50S ribosomal protein L22	299.3	50S ribosomal protein L22	K02880	107.8	1.4e-31	large subunit ribosomal protein L17e	63.4271	126.79	1167.18	1009.99	26.2645	50.5373	212.264	191.496	120.14	2.42045	0.441543	6.31e-09	5.04266e-08
Methanoperedens_02088	Thermosome subunit alpha	0	Thermosome subunit beta	1024.2	Thermosome subunit	K22447	762.8	3.6e-230	archaeal chaperonin	34.1178	49.2565	518.14	453.118	52.5289	72.9983	350.355	319.77	198.913	2.41947	0.337627	1.27085e-13	1.52126e-12
Methanoperedens_01159	hypothetical protein	0		501.1	Putative hydrocarbon binding protein (Contains V4R domain)	K07013	84	3.1e-24	uncharacterized protein	17.3917	16.9966	221.091	291.388	11.9384	11.2305	66.6528	82.941	43.1907	2.4128	0.667219	7.35784e-05	0.000345028
Methanoperedens_02959	Photosystem I assembly protein Ycf3	0		161	Tetratricopeptide repeat protein	K09667	181.8	3.9e-54	protein O-Glcc transferase [EC:2.4.1.255]	25.1213	12.2753	257.939	288.839	23.8768	11.2305	107.67	125.834	67.1529	2.40408	0.538999	2.30243e-06	1.32495e-05
Methanoperedens_03534	Amidase	0	Glutamyl-tR(Gln) amidotransferase subunit A	943.3	Glutamyl-tR(Gln) amidotransferase subunit A	K02433	641.7	2.7e-193	aspartyl-tR(Asn)/glutamyl-tR(Gln) amidotransferase subunit A [EC:6.3.5.6 6.3.5.7]	19.9381	35.4276	309.589	323.21	26.2645	44.922	179.108	194.952	111.312	2.40381	0.435915	6.15092e-09	4.94339e-08
Methanoperedens_03368	30S ribosomal protein S19e	0	30S ribosomal protein S19e	305.4	30S ribosomal protein S19e	K02966	211.6	2.5e-63	small subunit ribosomal protein S19e	97.3702	83.9633	1198.61	1105.39	40.5905	33.6915	219.442	211.215	126.235	2.40377	0.384745	1.13786e-10	1.10552e-09
Methanoperedens_03030	hypothetical protein	0		889.4	Uncharacterized protein					22.4276	25.2902	292.982	291.291	31.0398	33.6915	178.083	184.788	106.9	2.40345	0.415433	1.7699e-09	1.51698e-08
Methanoperedens_00792	hypothetical protein	0	CoB--CoM heterodisulfide reductase iron-sulfur subunit C 2	395.6	Uncharacterized protein	K03390	154.5	6.4e-46	heterodisulfide reductase subunit C2 [EC:1.8.7.3 1.8.98.4 1.8.98.5 1.8.98.6]	31.8203	33.3188	444.521	408.673	16.7138	16.8458	102.543	98.3908	58.6233	2.40165	0.550517	3.37441e-06	1.90322e-05
Methanoperedens_03092	Exodeoxyribonuclease 7 large subunit	0	Exodeoxyribonuclease 7 large subunit	802.4	Exodeoxyribonuclease VII large subunit	K03601	491.6	7e-148	exodeoxyribonuclease VII large subunit [EC:3.1.11.6]	14.8129	5.17016	166.236	153.296	16.7138	5.61525	82.3761	79.2818	45.9967	2.39754	0.628455	3.97659e-05	0.000193841
Methanoperedens_01641	Ribosomal R large subunit methyltransferase E	0	Ribosomal R large subunit methyltransferase E	501.9	Ribosomal R large subunit methyltransferase E	K02427	279.5	6.1e-84	23S rR (uridine2552-2'-O)-methyltransferase [EC:2.1.1.166]	3.38248	0	62.8455	67.2267	2.38768	0	19.4831	20.3287	10.5499	2.39188	1.40886	0.0168043	0.0409218
Methanoperedens_01687	2,3-bisphosphoglycerate-independent phosphoglycerate mutase 1	0	2,3-bisphosphoglycerate-independent phosphoglycerate mutase	805.8	2,3-bisphosphoglycerate-independent phosphoglycerate mutase	K15635	542.8	1e-163	2,3-bisphosphoglycerate-independent phosphoglycerate mutase [EC:5.4.2.12]	21.641	26.4368	265.235	328.415	23.8768	28.0763	128.179	166.085	86.5542	2.38987	0.501033	3.82531e-07	2.48339e-06
Methanoperedens_03508	Glutamyl-tR(Gln) amidotransferase subunit E	0	Glutamyl-tR(Gln) amidotransferase subunit E	1211.8	Glutamyl-tR(Gln) amidotransferase subunit E	K03330	877.8	8.6e-265	glutamyl-tR(Gln) amidotransferase subunit E [EC:6.3.5.7]	14.9772	13.3064	180.19	182.347	26.2645	22.461	138.775	146.773	83.5683	2.38561	0.463321	7.09477e-08	5.09566e-07
Methanoperedens_03498	hypothetical protein	0	Uncharacterized protein MJ1544	896.7	Putative ATPase (AAA+ superfamily)	K07133	319.6	8.8e-96	uncharacterized protein	1.93502	4.72767	54.2436	52.4761	2.38768	5.61525	29.3956	29.4766	16.7188	2.38533	1.09071	0.00724684	0.0200188
Methanoperedens_03185	hypothetical protein	0	Uncharacterized protein MJ1658	252.7	Uncharacterized protein					13.7464	16.7927	239.721	240.016	4.77536	5.61525	36.5736	38.2179	21.2955	2.3784	0.928817	0.00279269	0.00872562
Methanoperedens_01017	Ni-sirohydrochlorin a,c-diamide reductive cyclase complex, component CfbD	0	Ni-sirohydrochlorin a,c-diamide reductive cyclase complex, component CfbD	737.3	Putative methanogenesis marker 13 metalloprotein	K21611	560.6	2.3e-169	Ni-sirohydrochlorin a,c-diamide reductive cyclase subunit CfbD [EC:6.3.3.7]	81.0518	22.6316	756.357	694.259	83.5688	22.461	342.493	328.105	194.157	2.3725	0.505768	6.44531e-07	4.07246e-06
Methanoperedens_02707	hypothetical protein	0		392.5	Conserved Archaeal protein (DUF2204)					4.4286	0	99.6048	69.9212	2.38768	0	23.5849	16.6695	10.6605	2.35614	1.4474	0.0181697	0.0435735
Methanoperedens_01787	Sensor histidine kise RcsC	0	Sensor kise CckA	1706	PAS domain S-box	K13587	609.7	1.2e-183	two-component system, cell cycle sensor histidine kise and response regulator CckA [EC:2.7.13.3]	2.94565	4.7979	50.5687	52.7086	7.16304	11.2305	54.0059	55.9038	32.0758	2.35386	0.750178	0.00042207	0.00165728
Methanoperedens_01890	50S ribosomal protein L7Ae	0	50S ribosomal protein L7Ae	236.1	50S ribosomal protein L7Ae	K02936	74.4	2.4e-21	large subunit ribosomal protein L7Ae	83.8194	102.394	1104.26	1075.58	28.6522	33.6915	165.778	168.525	99.1615	2.35375	0.426566	8.37976e-09	6.58542e-08
Methanoperedens_00601	Tungsten-containing aldehyde ferredoxin oxidoreductase	0	Tungsten-containing aldehyde ferredoxin oxidoreductase	1159.4	Aldehyde ferredoxin oxidoreductase	K03738	716.6	8.8e-216	aldehyde:ferredoxin oxidoreductase [EC:1.2.7.5]	3.00928	3.67615	48.0643	57.0146	4.77536	5.61525	33.4973	41.2672	21.2888	2.35252	0.944275	0.00318697	0.00976397
Methanoperedens_01451	D-directed R polymerase subunit E'	0	D-directed R polymerase subunit E'	369	D-directed R polymerase subunit E	K03049	251.2	9.3e-76	D-directed R polymerase subunit E' [EC:2.7.7.6]	14.9417	36.5058	288.571	292.11	9.55072	22.461	81.0088	85.5837	49.6511	2.34576	0.630517	3.97466e-05	0.000193841
Methanoperedens_03469	hypothetical protein	0		314.3	Uncharacterized protein					29.4565	47.979	475.282	427.688	14.3261	22.461	101.517	95.3415	58.4115	2.34012	0.559026	6.46052e-06	3.51121e-05
Methanoperedens_01767	hypothetical protein	0		857.4	Uncharacterized protein					11.9881	9.76318	142.629	150.678	14.3261	11.2305	74.8563	82.3311	45.686	2.33291	0.61637	4.18402e-05	0.000203603
Methanoperedens_01951	6-carboxyhexanoate--CoA ligase	0	6-carboxyhexanoate--CoA ligase	507.7	6-carboxyhexanoate--CoA ligase	K01906	275.6	6.5e-83	6-carboxyhexanoate--CoA ligase [EC:6.2.1.14]	0	8.10457	57.3072	80.1005	0	5.61525	18.1159	26.4273	12.5396	2.33143	1.47277	0.0155255	0.0384344
Methanoperedens_00108	Glycosyltransferase AglD	0	Undecaprenyl-phosphate 4-deoxy-4-formamido-L-arabinose transferase	1116.7	Glyco_trans_2-like domain-containing protein	K23683	345.6	1.1e-103	glycosyltransferase AglD [EC:2.4.1.-]	14.3911	10.5482	152.455	172.951	23.8768	16.8458	111.088	130.103	70.4785	2.33026	0.512429	1.46149e-06	8.58437e-06
Methanoperedens_00237	Transcription factor E	0	Transcription factor E	346.3	Transcription factor E	K03136	77.1	1.8e-22	transcription initiation factor TFIIE subunit alpha	0	11.9948	91.2157	108.518	0	5.61525	19.4831	23.378	12.1191	2.3235	1.43698	0.0156816	0.0387195
Methanoperedens_01015	hypothetical protein	0		276.2	Uncharacterized protein					18.151	14.7823	250.466	250.616	7.16304	5.61525	43.4098	45.3329	25.3803	2.31951	0.826611	0.00136237	0.0046906
Methanoperedens_01393	hypothetical protein	0		578.2	Peptidase family M23					0	0	40.5867	36.427	0	0	13.6724	10.5709	6.06082	2.31531	2.42486	0.0179967	0.0433418
Methanoperedens_00267	hypothetical protein	0		304.7	Uncharacterized protein					0	0	68.6911	53.195	0	0	13.3306	10.7742	6.02619	2.31383	2.41666	0.0180262	0.043376
Methanoperedens_00957	hypothetical protein	0		976.1	Uncharacterized protein					30.1145	47.6081	437.106	398.798	40.5905	61.7678	258.75	246.383	151.873	2.31376	0.368707	6.19256e-11	6.20788e-10
Methanoperedens_01821	hypothetical protein	0	Uncharacterized protease MJ1657	723.4	Collagese-like protease	K08303	52.6	5.1e-15	putative protease [EC:3.4.-.-]	22.3478	24.2669	267.907	288.268	21.4891	22.461	113.139	126.851	70.985	2.30767	0.500953	1.03286e-06	6.32875e-06
Methanoperedens_03177	hypothetical protein	0		203.4	Uncharacterized protein					8.34125	0	146.821	165.782	2.38768	0	18.4577	19.7188	10.1411	2.30358	1.41318	0.0192849	0.0458219
Methanoperedens_01932	hypothetical protein	0		164.5	Uncharacterized protein					53.6968	0	546.094	486.734	11.9384	0	53.3223	49.602	28.7157	2.30224	0.80835	0.00120965	0.00420562
Methanoperedens_03476	hypothetical protein	0		144.8	Uncharacterized protein					0	0	129.253	114.574	0	0	12.3051	11.3841	5.9223	2.28857	2.39694	0.0184568	0.0441609
Methanoperedens_02107	Ornithine carbamoyltransferase, abolic	0	Ornithine carbamoyltransferase	605.9	Ornithine carbamoyltransferase	K00611	478	5.7e-144	ornithine carbamoyltransferase [EC:2.1.3.3]	51.0385	20.783	479.687	468.221	42.9782	16.8458	177.399	180.925	104.537	2.28768	0.444958	8.46296e-08	6.04771e-07
Methanoperedens_02378	Tetrahydromethanopterin S-methyltransferase subunit C	0	Tetrahydromethanopterin S-methyltransferase subunit C	496.5	Tetrahydromethanopterin S-methyltransferase subunit C	K00579	315	6.4e-95	tetrahydromethanopterin S-methyltransferase subunit C [EC:2.1.1.86]	100.885	55.6575	911.218	995.592	74.0181	39.3068	293.273	334.813	185.353	2.27811	0.368165	1.84905e-10	1.76032e-09
Methanoperedens_01004	hypothetical protein	0		281.2	Uncharacterized protein					0	0	85.6864	60.7375	0	0	13.3306	10.5709	5.97537	2.27398	2.41196	0.0186676	0.0445043
Methanoperedens_01617	3-ketoacyl-CoA thiolase	0	Uncharacterized protein MTH_793	762.7	Acetyl-CoA acetyltransferase	K00626	191	8.4e-57	acetyl-CoA C-acetyltransferase [EC:2.3.1.9]	30.8412	43.0581	382.015	412.875	33.4275	44.922	181.843	205.116	116.327	2.26998	0.40847	5.731e-09	4.64539e-08
Methanoperedens_01705	hypothetical protein	0		995.3	Ribosomal methyltransferase Rsm22					1.73216	4.23202	39.5229	51.8008	2.38768	5.61525	23.9267	32.7292	16.1647	2.2676	1.12939	0.0101516	0.0269159
Methanoperedens_02373	Tetrahydromethanopterin S-methyltransferase subunit H	0	Tetrahydromethanopterin S-methyltransferase subunit H	629	N5-methyltetrahydromethanopterin:coenzyme M methyltransferase subunit H	K00584	449.9	7.5e-136	tetrahydromethanopterin S-methyltransferase subunit H [EC:2.1.1.86]	113.83	145.678	1328.68	1391.46	100.283	123.536	514.081	562.088	324.997	2.26235	0.270942	1.1811e-17	1.90385e-16
Methanoperedens_03180	Methyl-coenzyme M reductase II operon protein D	0	Methyl-coenzyme M reductase operon protein D	350.9	Methyl-coenzyme M reductase operon protein D	K03422	183.7	3.3e-55	methyl-coenzyme M reductase subunit D	7091.7	8372.07	80848.2	81994.4	3409.61	3874.52	17070.6	18066.1	10605.2	2.26014	0.149296	1.44555e-52	8.72557e-51
Methanoperedens_01448	hypothetical protein	0	30S ribosomal protein S24e	211.1	30S ribosomal protein S24e	K02974	64.7	1.8e-18	small subunit ribosomal protein S24e	112.063	73.0116	1244.39	1026.89	35.8152	22.461	174.665	150.432	95.8433	2.25855	0.445504	1.12162e-07	7.87635e-07
Methanoperedens_01150	ATP-dependent zinc metalloprotease FtsH	0	Protein CdcH	1638.2	AAA family ATPase, CDC48 subfamily	K13525	977.4	1.3e-294	transitiol endoplasmic reticulum ATPase	32.7685	30.0226	378.516	320.692	76.4057	67.383	387.612	342.538	218.485	2.25806	0.311589	1.0817e-13	1.30034e-12
Methanoperedens_03358	30S ribosomal protein S17e	0	30S ribosomal protein S17e	129	30S ribosomal protein S17e	K02962	46	9e-13	small subunit ribosomal protein S17e	25.6462	0	300.947	331.079	4.77536	0	24.6103	28.2569	14.4106	2.25178	1.1272	0.0123229	0.0317243
Methanoperedens_01466	O-succinylhomoserine sulfhydrylase	0	L-methionine gamma-lyase	773.9	Cystathionine beta-lyase/cystathionine gamma-synthase	K01761	520.5	5.1e-157	methionine-gamma-lyase [EC:4.4.1.11]	17.5785	48.3165	329.469	337.945	19.1014	50.5373	157.232	168.525	98.8489	2.25096	0.517367	1.88352e-06	1.09949e-05
Methanoperedens_01603	D-inositol-3-phosphate glycosyltransferase	0	D-inositol 3-phosphate glycosyltransferase	518.5	Glycosyltransferase	K16148	141.9	6.9e-42	alpha-maltose-1-phosphate synthase [EC:2.4.1.342]	3.34299	0	69.7396	49.0553	2.38768	0	21.8758	16.0597	10.0808	2.24298	1.44294	0.0214175	0.0503054
Methanoperedens_02379	Tetrahydromethanopterin S-methyltransferase subunit D	0	Tetrahydromethanopterin S-methyltransferase subunit D	454.5	Tetrahydromethanopterin S-methyltransferase subunit D	K00580	287.6	1.5e-86	tetrahydromethanopterin S-methyltransferase subunit D [EC:2.1.1.86]	87.6683	171.354	1303.08	1308.6	59.692	112.305	389.663	408.403	242.516	2.23721	0.363615	9.42158e-11	9.2488e-10
Methanoperedens_01197	hypothetical protein	0	Putative phosphoenolpyruvate synthase	1762.3	Phosphoenolpyruvate synthase/pyruvate phosphate dikise	K22579	650.5	9.5e-196	rifampicin phosphotransferase [EC:2.7.9.6]	8.71741	4.733	99.1377	91.397	21.4891	11.2305	107.328	86.8034	56.7128	2.22975	0.572046	2.63358e-05	0.000132944
Methanoperedens_03293	hypothetical protein	0	UPF0313 protein MM_1287	1234.6	UPF0313 protein ANME2D_00989	K04034	77.2	2.1e-22	aerobic magnesium-protoporphyrin IX monomethyl ester cyclase [EC:1.21.98.3]	4.31733	10.5482	80.6839	86.0743	7.16304	16.8458	58.7912	62.2057	36.2514	2.22959	0.712487	0.000384439	0.00152326
Methanoperedens_02957	Tetrahedral aminopeptidase	0	Putative aminopeptidase MJ0555	698	Peptidase family protein	K20608	425.4	2.3e-128	tetrahedral aminopeptidase [EC:3.4.11.-]	24.5471	29.9869	278.448	321.45	23.8768	28.0763	118.95	143.52	78.6058	2.22796	0.488095	1.15723e-06	7.00012e-06
Methanoperedens_02960	Vitamin B12 import ATP-binding protein BtuD	0	Uncharacterized ABC transporter ATP-binding protein MJ1662	1121.3	ATPase component of various ABC-type transport systems with duplicated ATPase domain	K00400	737.6	1.7e-222	methyl coenzyme M reductase system, component A2	104.002	132.574	1231.23	1174.77	164.75	202.149	856.575	852.991	519.116	2.22593	0.224913	6.47586e-24	1.54387e-22
Methanoperedens_02864	Glutamine synthetase	0	Glutamine synthetase	905.2	Glutamine synthetase	K01915	408	1.4e-122	glutamine synthetase [EC:6.3.1.2]	52.4819	71.2359	646.265	612.705	64.4673	84.2288	348.646	344.978	210.58	2.22092	0.307806	1.02801e-13	1.24635e-12
Methanoperedens_02246	Energy-coupling factor transporter transmembrane protein EcfT	0	Uncharacterized protein MJ1571	592	Cobalt ABC transporter, permease protein CbiQ	K02008	162	4.5e-48	cobalt/nickel transport system permease protein	96.071	93.8887	833.882	1231.3	83.5688	78.6135	318.225	491.141	242.887	2.21458	0.397756	5.08707e-09	4.13525e-08
Methanoperedens_00991	hypothetical protein	0		377.9	Uncharacterized protein					47.4668	23.1943	544.624	387.06	23.8768	11.2305	120.317	88.4297	60.9635	2.21434	0.584239	3.86874e-05	0.000189562
Methanoperedens_01957	D topoisomerase 1	0	D topoisomerase 1	1368.6	D topoisomerase 1	K03168	575.1	8.3e-173	D topoisomerase I [EC:5.6.2.1]	30.4124	21.672	302.766	291.631	57.3043	39.3068	250.546	249.026	149.046	2.21416	0.350973	8.64857e-11	8.54913e-10
Methanoperedens_01085	hypothetical protein	0		464.2	Uncharacterized protein					19.0922	7.77438	174.252	225.192	14.3261	5.61525	57.424	72.1668	37.383	2.21332	0.694664	0.000387638	0.00153379
Methanoperedens_01783	RIO-type serine/threonine-protein kise Rio1	0	RIO-type serine/threonine-protein kise Rio1	508.4	Non-specific serine/threonine protein kise	K07178	302.9	1.1e-90	RIO kise 1 [EC:2.7.11.1]	13.0669	0	119.26	130.459	9.55072	0	38.2827	43.7066	22.885	2.20625	0.885164	0.00342886	0.0104262
Methanoperedens_00171	hypothetical protein	0	Type I restriction enzyme EcoAI R protein	741.9	Helicase, type I site-specific restriction-modification system restriction subunit	K01153	167.4	1.2e-49	type I restriction enzyme, R subunit [EC:3.1.21.3]	14.123	28.7546	232.478	206.805	14.3261	28.0763	103.568	96.1546	60.5313	2.20436	0.553228	1.41155e-05	7.38853e-05
Methanoperedens_00540	Serine hydroxymethyltransferase	0	Serine hydroxymethyltransferase	825.1	Serine hydroxymethyltransferase	K00600	701.1	3.4e-211	glycine hydroxymethyltransferase [EC:2.1.2.1]	4.17063	20.3794	130.508	122.787	4.77536	22.461	65.6274	63.6287	39.1231	2.20253	0.77314	0.000714681	0.00262977
Methanoperedens_03076	Thiosulfate sulfurtransferase GlpE	0	Sulfurtransferase Alvin_2599	264.2	Rhodanese-related sulfurtransferase	K03972	116.6	2.9e-34	phage shock protein E	0	0	58.9575	87.5917	0	0	9.57067	14.4334	6.00101	2.18777	2.43711	0.0200573	0.0475436
Methanoperedens_02252	hypothetical protein	0		636.3	Uncharacterized protein					5.45491	0	60.4549	69.4068	4.77536	0	23.243	27.8503	13.9672	2.18385	1.13583	0.0144404	0.0361264
Methanoperedens_03126	putative protein	0	Uncharacterized protein AF_1796	377.9	3-hexulose-6-phosphate isomerase	K08094	224.3	2e-67	6-phospho-3-hexuloisomerase [EC:5.3.1.27]	16.929	20.6806	244.18	206.753	9.55072	11.2305	60.5003	53.4644	33.6865	2.18338	0.704951	0.000503005	0.00194683
Methanoperedens_02512	30S ribosomal protein S8	0	30S ribosomal protein S8	267.3	30S ribosomal protein S8	K02994	107.5	1.2e-31	small subunit ribosomal protein S8	72.6972	113.028	980.169	891.22	26.2645	39.3068	155.523	147.586	92.1702	2.18168	0.440023	1.56362e-07	1.06892e-06
Methanoperedens_01053	D(P)H-quinone oxidoreductase subunit 2, chloroplastic	0	DH-quinone oxidoreductase subunit N	913.3	Formate hydrogenlyase subunit 3/multisubunit +/H+ antiporter, MnhD subunit	K05568	467.1	1.9e-140	multicomponent +:H+ antiporter subunit D	36.896	38.6334	355.071	440.572	50.1413	50.5373	212.605	273.827	146.778	2.17972	0.392367	6.19928e-09	4.96818e-08
Methanoperedens_00183	hypothetical protein	0	Putative type I restriction enzyme MpnORFDP M protein	1071.6	Site-specific D-methyltransferase (adenine-specific)	K03427	449.4	5.5e-135	type I restriction enzyme M protein [EC:2.1.1.72]	11.2202	11.7486	125.917	134.575	16.7138	16.8458	82.3761	91.8856	51.9553	2.17963	0.564475	2.97823e-05	0.000149501
Methanoperedens_00138	hypothetical protein	0		126.7	Uncharacterized protein					42.2532	0	431.55	429.048	7.16304	0	32.1301	33.339	18.158	2.17777	0.972487	0.00687405	0.0191193
Methanoperedens_01785	Fibrillarin-like rR/tR 2'-O-methyltransferase	0	Fibrillarin-like rR/tR 2'-O-methyltransferase	426.4	Fibrillarin-like rR/tR 2'-O-methyltransferase	K04795	282.8	2.6e-85	fibrillarin-like pre-rR processing protein	19.2634	18.8259	253.676	218.266	11.9384	11.2305	69.0455	58.9531	37.7919	2.17246	0.665461	0.000287852	0.00117457
Methanoperedens_00514	L-tyrosine/L-aspartate decarboxylase	0	Probable L-tyrosine/L-aspartate decarboxylase	745.3	Probable L-tyrosine/L-aspartate decarboxylase	K18933	488.9	1.8e-147	tyrosine decarboxylase / aspartate 1-decarboxylase [EC:4.1.1.25 4.1.1.11]	4.54576	5.55313	68.9008	73.4597	4.77536	5.61525	31.7883	34.9653	19.2861	2.17161	0.938764	0.00538604	0.0154814
Methanoperedens_00150	hypothetical protein	0	Extracellular metalloprotease	766.5	Zinc metalloprotease (Elastase)	K01400	332.6	1.3e-99	bacillolysin [EC:3.4.24.28]	175.525	118.497	1558.33	1568.39	181.464	117.92	707.546	743.623	437.638	2.16859	0.271299	4.2435e-16	6.0802e-15
Methanoperedens_03229	hypothetical protein	0		1044.3	4Fe-4S ferredoxin-type domain-containing protein	K02574	68.6	1.1e-19	ferredoxin-type protein pH	21.0735	31.6843	245.703	281.231	31.0398	44.922	158.941	189.667	106.142	2.16274	0.433615	1.24708e-07	8.65031e-07
Methanoperedens_02165	5-amino-6-(D-ribitylamino)uracil--L-tyrosine 4-hydroxyphenyl transferase	0	5-amino-6-(D-ribitylamino)uracil--L-tyrosine 4-hydroxyphenyl transferase 1	679.5	5-amino-6-(D-ribitylamino)uracil--L-tyrosine 4-hydroxyphenyl transferase	K11781	488.3	2.4e-147	5-amino-6-(D-ribitylamino)uracil---L-tyrosine 4-hydroxyphenyl transferase [EC:2.5.1.147]	12.6718	18.576	179.264	162.409	11.9384	16.8458	74.1727	69.1175	43.0186	2.15787	0.62064	0.000127438	0.000576619
Methanoperedens_03467	Histidinol-phosphate aminotransferase	0	Adenosylcobalamin biosynthesis bifunctiol protein CobDQ	933.3	L-threonine-O-3-phosphate decarboxylase	K04720	440.7	1e-132	threonine-phosphate decarboxylase [EC:4.1.1.81]	1.87178	4.57317	49.4203	48.3275	2.38768	5.61525	27.6866	24.5977	15.0718	2.15702	1.10451	0.0124365	0.0319586
Methanoperedens_00202	lipid II flippase MurJ	0		818.1	Membrane protein involved in the export of O-antigen and teichoic acid	K03328	201.9	3.5e-60	polysaccharide transporter, PST family	0	0	19.8368	20.9455	0	0	11.6215	11.1808	5.70057	2.15343	2.36315	0.0208505	0.0491711
Methanoperedens_01540	hypothetical protein	0	Uncharacterized protein AF_1718	131.7	Uncharacterized protein					43.5012	0	372.216	436.333	9.55072	0	35.89	43.9099	22.3377	2.15297	0.90008	0.00442721	0.0130697
Methanoperedens_00974	hypothetical protein	0		102.8	Uncharacterized protein					0	0	145.025	190.932	0	0	9.91247	13.4169	5.83235	2.15157	2.3977	0.0207678	0.0490168
Methanoperedens_02921	Ribosomal R small subunit methyltransferase A	0	Probable ribosomal R small subunit methyltransferase A	534.6	Probable ribosomal R small subunit methyltransferase A	K02528	255.5	1.8e-76	16S rR (adenine1518-N6/adenine1519-N6)-dimethyltransferase [EC:2.1.1.182]	12.5883	0	114.892	118.081	9.55072	0	38.2827	40.8606	22.1735	2.15097	0.882618	0.00406093	0.01214
Methanoperedens_01216	hypothetical protein	0		520	Uncharacterized protein	K09595	30.6	3.4e-08	minor histocompatibility antigen H13 [EC:3.4.23.-]	2.85432	20.9211	114.438	136.787	2.38768	16.8458	42.0426	52.8545	28.5326	2.14766	0.937481	0.00348376	0.0105592
Methanoperedens_02456	Coenzyme F420-dependent sulfite reductase	0	Coenzyme F420-dependent sulfite reductase	677.9	Coenzyme F420-reducing hydrogese, beta subunit	K00441	287.3	4e-86	coenzyme F420 hydrogese subunit beta [EC:1.12.98.1]	13.057	0	109.806	118.355	11.9384	0	44.0934	49.602	26.4084	2.14638	0.826332	0.00255114	0.00806865
Methanoperedens_03121	Triosephosphate isomerase	0	Triosephosphate isomerase	422.2	Triosephosphate isomerase	K01803	59.5	5.2e-17	triosephosphate isomerase (TIM) [EC:5.3.1.1]	69.0388	84.3382	727.625	805.761	42.9782	50.5373	198.933	229.917	130.591	2.14238	0.381035	4.29495e-09	3.5628e-08
Methanoperedens_02740	hypothetical protein	0	Uncharacterized protein MJ0274	1148.3	Putative Fe-S oxidoreductase	K04034	63.6	2.6e-18	aerobic magnesium-protoporphyrin IX monomethyl ester cyclase [EC:1.21.98.3]	3.02517	0	38.9504	32.3103	4.77536	0	27.0029	22.7681	13.6366	2.13305	1.13618	0.016027	0.039435
Methanoperedens_03373	Geranylfarnesyl diphosphate synthase	0	Geranylgeranyl diphosphate synthase	682.6	Geranylgeranyl pyrophosphate synthase	K02523	282.6	1.6e-84	octaprenyl-diphosphate synthase [EC:2.5.1.90]	2.44772	0	41.4886	38.6459	2.38768	0	17.7741	17.2794	9.36029	2.1252	1.41499	0.0251551	0.0577854
Methanoperedens_00196	putative HTH-type transcriptiol regulator	0	Siroheme decarboxylase alpha subunit	302	Siroheme decarboxylase	K22225	188.5	1e-56	siroheme decarboxylase [EC:4.1.1.111]	16.9569	13.8098	226.618	206.83	7.16304	5.61525	42.0426	37.2015	23.0056	2.1245	0.840476	0.00308673	0.00953928
Methanoperedens_01115	Phosphomethylpyrimidine synthase	0	Phosphomethylpyrimidine synthase 1	854.7	Phosphomethylpyrimidine synthase	K03147	541.6	5.2e-163	phosphomethylpyrimidine synthase [EC:4.1.99.17]	32.1929	19.6635	276.113	311.321	38.2029	22.461	143.56	164.866	92.2723	2.11471	0.442536	5.24249e-07	3.35733e-06
Methanoperedens_01738	hypothetical protein	0	Archaeal Rqc2 homolog aRqcH	1305.4	Archaeal Rqc2 homolog aRqcH					5.16005	0	49.6182	46.2461	9.55072	0	40.3335	36.9982	21.7206	2.10916	0.886883	0.00475896	0.0138616
Methanoperedens_00166	Tyramine--L-glutamate ligase	0	Tyramine--L-glutamate ligase	596.7	Putative ATP-utilizing enzyme (ATP-grasp superfamily)	K06914	289.8	4.5e-87	tyramine---L-glutamate ligase [EC:6.3.4.24]	0	0	29.9717	30.4225	0	0	10.9379	11.5873	5.63131	2.10757	2.35007	0.0217228	0.0508897
Methanoperedens_03232	Archaeal histone A	0	Archaeal histone A	145.2	Histones H3 and H4	K24450	98.7	3.5e-29	D-binding protein	11.0147	0	215.422	151.401	2.38768	0	20.5086	15.0432	9.48487	2.10572	1.44376	0.0261151	0.0597007
Methanoperedens_00978	hypothetical protein	0		736.5	Phage major capsid protein, HK97 family					487.625	312.026	4127.31	3864.97	501.413	308.839	1863.89	1821.25	1123.85	2.10312	0.284981	3.96917e-14	5.00468e-13
Methanoperedens_03162	putative ribosome biogenesis protein	0	16S rR aminocarboxypropyltransferase	362.1	16S rR aminocarboxypropyltransferase	K09140	235.2	2.9e-70	pre-rR-processing protein TSR3	0	0	51.9191	49.31	0	0	11.2797	11.1808	5.61512	2.09996	2.346	0.021876	0.0510801
Methanoperedens_02454	Tungsten-containing aldehyde ferredoxin oxidoreductase	0	Tungsten-containing aldehyde ferredoxin oxidoreductase	1218.4	Aldehyde ferredoxin oxidoreductase	K03738	768.9	1.3e-231	aldehyde:ferredoxin oxidoreductase [EC:1.2.7.5]	21.1961	10.3573	180.097	182.42	35.8152	16.8458	133.648	141.081	81.8474	2.09813	0.461635	1.71547e-06	1.00346e-05
Methanoperedens_01162	Cytochrome b6-f complex subunit 4	0	Cytochrome b6-f complex subunit 4	310.1	Cytochrome b subunit of the bc complex	K03888	97.5	1.5e-28	mequinol-cytochrome c reductase cytochrome b/c subunit	16.6287	0	180.676	173.999	7.16304	0	34.1809	28.6634	17.5019	2.09283	0.990009	0.00919158	0.0246937
Methanoperedens_02371	hypothetical protein	0		204.5	DUF5658 domain-containing protein					8.18237	0	112.019	167.184	2.38768	0	14.356	21.1418	9.47137	2.0859	1.46049	0.0270441	0.0613373
Methanoperedens_00523	hypothetical protein	0		775	Uncharacterized protein					4.44005	10.848	104.928	69.2772	4.77536	11.2305	49.5624	34.1522	24.9301	2.08263	0.895827	0.00415803	0.0124041
Methanoperedens_00361	Dihydromethanophezine:CoB--CoM heterodisulfide reductase subunit E	0	Dihydromethanophezine:CoB--CoM heterodisulfide reductase subunit E	545.4	CoB-CoM heterodisulfide reductase, subunit E	K08265	193.7	7.4e-58	heterodisulfide reductase subunit E [EC:1.8.98.1]	65.8472	107.252	773.71	807.243	50.1413	78.6135	258.75	281.755	167.315	2.08186	0.355106	8.29914e-10	7.35771e-09
Methanoperedens_01934	hypothetical protein	0		172.9	Glutaredoxin-like protein	K06191	46.3	7e-13	glutaredoxin-like protein NrdH	69.9307	24.4079	586.148	643.907	16.7138	5.61525	61.5257	70.5405	38.5988	2.07953	0.65521	0.000434881	0.00170409
Methanoperedens_03136	Argininosuccite synthase	0	Argininosuccite synthase	794.7	Argininosuccite synthase	K01940	544.3	7.3e-164	argininosuccite synthase [EC:6.3.4.5]	15.3812	10.737	154.707	146.524	16.7138	11.2305	73.8308	72.9799	43.6888	2.07699	0.59299	0.000134392	0.000603275
Methanoperedens_01415	Methionine--tR ligase	0	Methionine--tR ligase	1393.6	Methionine--tR ligase	K01874	673	1.6e-202	methionyl-tR synthetase [EC:6.1.1.10]	23.0129	24.9891	230.04	236.765	42.9782	44.922	188.679	202.677	119.814	2.07609	0.374017	7.50971e-09	5.95113e-08
Methanoperedens_00606	hypothetical protein	0		824.3	Uncharacterized protein	K01155	164.5	1.1e-48	type II restriction enzyme [EC:3.1.21.4]	6.15142	0	54.1382	64.7481	7.16304	0	27.6866	34.5587	17.3521	2.0733	0.999065	0.00997288	0.0265044
Methanoperedens_03208	hypothetical protein	0	Uncharacterized protein MJ0660	139.4	Putative R-binding protein, contains TRAM domain	K03215	42.2	9.3e-12	23S rR (uracil1939-C5)-methyltransferase [EC:2.1.1.190]	133.108	88.6937	1139.91	1292.41	26.2645	16.8458	98.7829	117.093	64.7466	2.06404	0.511217	1.55101e-05	8.08861e-05
Methanoperedens_02963	Adenylate kise	0	Adenylate kise	443	Adenylate kise	K00939	263.5	8.9e-79	adenylate kise [EC:2.7.4.3]	31.6737	19.3464	336.832	257.395	19.1014	11.2305	89.2123	71.1503	47.6736	2.05908	0.598919	0.000161712	0.000699357
Methanoperedens_01609	GDP-mannose 4,6-dehydratase	0	GDP-mannose 4,6 dehydratase 1	720.3	GDP-mannose 4,6-dehydratase	K01711	564.8	2.5e-170	GDPmannose 4,6-dehydratase [EC:4.2.1.47]	29.5409	36.0874	302.516	331.973	28.6522	33.6915	128.862	147.586	84.698	2.05899	0.447663	1.06691e-06	6.52334e-06
Methanoperedens_02863	Global nitrogen regulator NrpRI	0	Global nitrogen regulator NrpRI	646	Uncharacterized protein	K09720	405.9	2e-122	HTH-type transcriptiol regulator, global nitrogen regulator NrpRI	38.9342	31.7082	376.5	348.098	35.8152	28.0763	152.105	146.57	90.6416	2.05774	0.418808	2.6703e-07	1.78671e-06
Methanoperedens_01741	Sulfate adenylyltransferase	0	Sulfate adenylyltransferase	782.7	Sulfate adenylyltransferase	K00958	492.9	2.2e-148	sulfate adenylyltransferase [EC:2.7.7.4]	34.0033	27.6924	353.94	282.958	35.8152	28.0763	163.727	136.609	91.0567	2.05547	0.441323	8.87483e-07	5.50938e-06
Methanoperedens_02453	hypothetical protein	0		632.1	Uncharacterized protein					26.1139	38.2812	293.668	313.349	23.8768	33.6915	117.924	131.527	76.7548	2.05516	0.469943	2.93534e-06	1.66885e-05
Methanoperedens_02668	putative protein	0		518.1	Sugar phosphate isomerase/epimerase	K03079	99.9	3.2e-29	L-ribulose-5-phosphate 3-epimerase [EC:5.1.3.22]	10.1076	0	97.7423	100.758	7.16304	0	30.421	30.493	17.0193	2.05231	0.979517	0.00990987	0.0263984
Methanoperedens_00724	hypothetical protein	0		156	R-binding protein involved in rR processing	K07569	71.9	7.8e-21	R-binding protein	0	25.5986	198.083	171.262	0	5.61525	19.8249	17.8892	10.8324	2.04872	1.43181	0.0234213	0.0543305
Methanoperedens_01569	UDP-N-acetylglucosamine 3-dehydrogese	0	UDP-N-acetylglucosamine 3-dehydrogese	610.9	Putative dehydrogese	K18855	408.5	4.9e-123	UDP-N-acetylglucosamine 3-dehydrogese [EC:1.1.1.374]	8.26105	13.4557	119.38	114.574	7.16304	11.2305	45.4607	45.5362	27.3476	2.04563	0.762589	0.00188588	0.00619958
Methanoperedens_01997	Type A flavoprotein FprA	0	Nitric oxide reductase	823.5	Putative flavoprotein	K12264	570.5	3.1e-172	aerobic nitric oxide reductase flavorubredoxin	23.8051	37.0115	286.397	270.933	26.2645	39.3068	138.775	137.015	85.3403	2.04077	0.442242	9.31531e-07	5.75763e-06
Methanoperedens_01818	Translation initiation factor 2 subunit alpha	0	Translation initiation factor 2 subunit alpha	522.7	Translation initiation factor 2, alpha subunit (EIF-2alpha)	K03237	239.1	2e-71	translation initiation factor 2 subunit 1	213.977	118.816	1835.64	1488.05	157.587	84.2288	593.723	501.915	334.363	2.02936	0.349997	1.92825e-09	1.64773e-08
Methanoperedens_03383	hypothetical protein	0		354.8	Uncharacterized protein					35.586	24.8412	341.361	331.446	16.7138	11.2305	70.4128	71.1503	42.3768	2.02115	0.595194	0.000202167	0.000848443
Methanoperedens_03199	hypothetical protein	0		1159.8	Archaeal flagella assembly protein J	K07333	497.5	1.3e-149	archaeal flagellar protein FlaJ	4.00225	3.25945	44.3555	52.5342	7.16304	5.61525	34.8646	39.4376	21.7701	2.02031	0.844836	0.00457551	0.0134376
Methanoperedens_01447	30S ribosomal protein S27ae	0	30S ribosomal protein S27ae	112.8	30S ribosomal protein S27ae	K02977	40.4	2.4e-11	ubiquitin-small subunit ribosomal protein S27Ae	85.9149	83.9633	991.371	868.142	11.9384	11.2305	60.5003	55.0907	34.69	2.01905	0.663271	0.000649486	0.00243407
Methanoperedens_02636	Phosphoenolpyruvate guanylyltransferase	0	2-phospho-L-lactate guanylyltransferase	409.1	2-phospho-L-lactate guanylyltransferase	K14941	134.3	1e-39	2-phospho-L-lactate/phosphoenolpyruvate guanylyltransferase [EC:2.7.7.68 2.7.7.105]	12.1007	0	109.127	116.13	7.16304	0	28.3702	31.5094	16.7607	2.01898	0.986324	0.0110603	0.0290167
Methanoperedens_01996	putative cobalt-precorrin-6B C(15)-methyltransferase (decarboxylating)	0	Probable cobalt-precorrin-6B C(15)-methyltransferase (decarboxylating)	337.4	Precorrin-6Y C5,15-methyltransferase (Decarboxylating), CbiT subunit	K02191	165.9	1.5e-49	cobalt-precorrin-6B (C15)-methyltransferase [EC:2.1.1.196]	29.6258	12.0637	255.906	266.892	14.3261	5.61525	54.3477	59.1564	33.3614	2.01764	0.681347	0.000900148	0.00322847
Methanoperedens_02226	hypothetical protein	0	UPF0058 protein MTH_224	156	Putative metal-binding protein					96.6543	78.7156	805.139	1047.28	21.4891	16.8458	78.6162	106.929	55.97	2.01666	0.572013	0.000109773	0.000499882
Methanoperedens_01308	Bifunctiol enzyme Fae/Hps	0	Bifunctiol enzyme Fae/Hps	757.3	Bifunctiol enzyme Fae/Hps	K13812	657	1.5e-198	bifunctiol enzyme Fae/Hps [EC:4.2.1.147 4.1.2.43]	63.2368	69.2591	570.047	643.605	69.2427	72.9983	274.131	323.023	184.849	2.01176	0.32888	2.33689e-10	2.20258e-09
Methanoperedens_00694	hypothetical protein	0		732.3	hypothetical protein					4.75983	5.81464	62.8363	72.9405	4.77536	5.61525	27.6866	33.5423	17.9049	2.01092	0.954392	0.0090337	0.0243618
Methanoperedens_01897	hypothetical protein	0	Tungsten-containing formylmethanofuran dehydrogese 2 subunit B	809.7	Formylmethanofuran dehydrogese, subunit B	K00201	387.5	1.2e-116	formylmethanofuran dehydrogese subunit B [EC:1.2.7.12]	31.8203	36.2805	321.537	311.289	35.8152	39.3068	158.941	160.8	98.7158	2.00846	0.398983	1.31006e-07	9.06496e-07
Methanoperedens_01713	30S ribosomal protein S9	0	30S ribosomal protein S9	255.8	30S ribosomal protein S9	K02996	130	2.7e-38	small subunit ribosomal protein S9	251.931	110.478	1789.78	1948.62	93.1195	39.3068	290.538	330.138	188.275	2.00743	0.410339	2.98072e-07	1.97117e-06
Methanoperedens_01828	hypothetical protein	0	Uncharacterized protein MJ1488	823.9	Phytoene dehydrogese-like oxidoreductase	K09835	100.1	1.6e-29	prolycopene isomerase [EC:5.2.1.13]	10.4519	15.3218	126.737	130.464	11.9384	16.8458	63.5766	66.0682	39.6072	2.00367	0.624568	0.00035288	0.00140607
Methanoperedens_01892	Anthranilate phosphoribosyltransferase	0	Anthranilate phosphoribosyltransferase	581.3	Anthranilate phosphoribosyltransferase	K00766	483.6	1.2e-145	anthranilate phosphoribosyltransferase [EC:2.4.2.18]	17.5337	12.2396	151.046	177.265	16.7138	11.2305	63.2348	77.4522	42.1578	1.99986	0.617958	0.000340147	0.00136685
Methanoperedens_02979	Tryptophan--tR ligase	0	Tryptophan--tR ligase	879.4	Tryptophan--tR ligase	K01867	201.2	7e-60	tryptophanyl-tR synthetase [EC:6.1.1.2]	9.96692	9.74053	117.607	97.3801	11.9384	11.2305	61.8675	52.6513	34.4219	1.99661	0.672347	0.000815108	0.00294957
Methanoperedens_00415	hypothetical protein	0		813.9	Uncharacterized membrane protein	K06384	72	1.1e-20	stage II sporulation protein M	1.66825	0	22.8389	32.2269	2.38768	0	14.356	19.109	8.96316	1.99166	1.43823	0.0306884	0.0683921
Methanoperedens_03075	putative protein MTH_862	0	Uncharacterized protein MJ1183	334	Uncharacterized protein					16.2104	0	147.95	148.544	7.16304	0	28.712	30.0864	16.4904	1.99012	0.983918	0.0118446	0.030632
Methanoperedens_01039	Sodium/calcium exchanger MaX1	0	Inner membrane protein YrbG	495.4	K+dependent + exchanger related-protein	K07301	281.8	1.3e-84	cation:H+ antiporter	10.9098	6.66376	99.5727	120.069	9.55072	5.61525	38.2827	48.179	25.4069	1.98942	0.791975	0.00326477	0.00995929
Methanoperedens_00838	hypothetical protein	0		244.6	Uncharacterized protein					0	0	66.1531	71.6247	0	0	10.2543	11.5873	5.46041	1.98426	2.30626	0.0242189	0.0559063
Methanoperedens_03040	hypothetical protein	0		169.1	Uncharacterized protein					0	0	94.3983	102.206	0	0	10.2543	11.5873	5.46041	1.98426	2.30626	0.0242189	0.0559063
Methanoperedens_02628	Bifunctiol protein GlmU	0	Bifunctiol protein GlmU	588.6	Glucosamine-1-phosphate N-acetyltransferase	K23144	372.9	5.4e-112	UDP-N-acetylglucosamine diphosphorylase / glucose-1-phosphate thymidylyltransferase / UDP-N-acetylgalactosamine diphosphorylase / glucosamine-1-phosphate N-acetyltransferase / galactosamine-1-phosphate N-acetyltransferase [EC:2.7.7.23 2.7.7.24 2.7.7.83 2.3.1.157 2.3.1.276]	44.8809	67.8808	473.713	497.81	50.1413	72.9983	232.43	255.125	152.674	1.98361	0.35415	4.52514e-09	3.7428e-08
Methanoperedens_03184	hypothetical protein	1		269.6	Uncharacterized protein	K07451	23.3	7.3e-06	5-methylcytosine-specific restriction enzyme A [EC:3.1.21.-]	13.3201	16.272	173.673	199.172	4.77536	5.61525	27.3448	32.7292	17.6161	1.97995	0.953557	0.00982878	0.026207
Methanoperedens_01467	hypothetical protein	0	Pyruvate dehydrogese E1 component subunit alpha (Fragment)	719.2	Pyruvate dehydrogese E1 component, alpha subunit	K00166	418	1.5e-125	2-oxoisovalerate dehydrogese E1 component alpha subunit [EC:1.2.4.4]	11.9326	40.8155	231.818	222.976	11.9384	39.3068	101.859	102.253	63.8394	1.97705	0.614263	0.000219188	0.000913122
Methanoperedens_02743	Sulfhydrogese 1 subunit beta	0	Sulfhydrogese 1 subunit beta	736.5	4Fe-4S dicluster domain	K17996	341.7	1.1e-102	sulfhydrogese subunit beta (sulfur reductase) [EC:1.12.98.4]	2.43385	0	31.7335	45.6603	2.38768	0	13.6724	19.9221	8.99554	1.97414	1.4549	0.0316074	0.0701711
Methanoperedens_01468	1-deoxy-D-xylulose-5-phosphate synthase	0	Pyruvate dehydrogese E1 component subunit beta	643.7	Pyruvate/2-oxoglutarate dehydrogese complex, dehydrogese component beta subunit	K00162	482.8	3.1e-145	pyruvate dehydrogese E1 component beta subunit [EC:1.2.4.1]	26.5169	32.3933	299.064	249.721	23.8768	28.0763	118.266	102.863	68.2706	1.9727	0.485606	1.28353e-05	6.7558e-05
Methanoperedens_03114	50S ribosomal protein L30e	0	50S ribosomal protein L30e	186.4	Ribosomal protein L30E	K02908	74.3	2e-21	large subunit ribosomal protein L30e	131.502	0	1008.75	810.952	35.8152	0	120.659	101.237	64.4277	1.97255	0.8267	0.00358368	0.0108274
Methanoperedens_02812	Amino-acid acetyltransferase	0	Uncharacterized N-acetyltransferase CT2212	312.8	Acetyltransferase, N-acetylglutamate synthase	K00619	198.6	1.8e-59	amino-acid N-acetyltransferase [EC:2.3.1.1]	68.2767	55.6049	604.608	612.975	28.6522	22.461	111.43	117.906	70.1123	1.97092	0.4647	6.7236e-06	3.6472e-05
Methanoperedens_02736	CCA-adding enzyme	0	CCA-adding enzyme	905.6	CCA-adding enzyme	K07558	546	1.4e-164	tR nucleotidyltransferase (CCA-adding enzyme) [EC:2.7.7.72]	11.4299	4.65429	105.561	95.8925	14.3261	5.61525	58.1076	52.0414	32.5226	1.9667	0.686061	0.00122347	0.00424846
Methanoperedens_03218	hypothetical protein	0		942.2	Uncharacterized protein					1.80115	0	24.0712	31.4486	2.38768	0	14.0142	19.109	8.8777	1.96486	1.44157	0.0319367	0.070717
Methanoperedens_03209	hypothetical protein	0		126.3	Uncharacterized protein					247.331	286.239	2193.71	2582.37	45.3659	50.5373	176.715	217.313	122.483	1.96191	0.393512	1.53313e-07	1.0506e-06
Methanoperedens_03384	hypothetical protein	0	4,4'-diaponeurosporene oxygese	888.6	Amino_oxidase domain-containing protein	K02293	219.9	1.1e-65	15-cis-phytoene desaturase [EC:1.3.5.5]	59.45	42.1691	490.71	466.643	74.0181	50.5373	268.32	266.306	164.795	1.9562	0.326443	6.89879e-10	6.15467e-09
Methanoperedens_00266	D-directed R polymerase subunit L	0	D-directed R polymerase subunit L	181.8	D-directed R polymerase subunit L	K03056	112	2e-33	D-directed R polymerase subunit L [EC:2.7.7.6]	0	90.2832	517.939	576.565	0	22.461	58.7912	68.3043	37.3891	1.95161	1.23847	0.0118443	0.030632
Methanoperedens_01186	Tryptophan synthase alpha chain	0	Tryptophan synthase alpha chain	512.7	Tryptophan synthase alpha chain	K01695	348.4	8.5e-105	tryptophan synthase alpha chain [EC:4.2.1.20]	19.6004	15.9626	195.927	180.216	14.3261	11.2305	62.8929	59.7663	37.054	1.94732	0.627494	0.000561769	0.002145
Methanoperedens_03360	hypothetical protein	0	Preprotein translocase subunit SecG	109.4	Preprotein translocase subunit SecG					90.4367	73.652	889.276	820.323	14.3261	11.2305	61.8675	59.563	36.7468	1.93233	0.627443	0.000612291	0.00231919
Methanoperedens_01381	Thiamine-monophosphate kise	0	Uncharacterized protein MJ0640	649.4	Putative methanogenesis marker protein 2	K07123	382.6	2.3e-115	uncharacterized protein	0	0	41.2341	39.6515	0	0	16.4069	7.92818	6.08376	1.92794	2.42973	0.0241421	0.0558656
Methanoperedens_02602	Type A flavoprotein FprA	0	Uncharacterized protein MJ0732	283.5	Putative flavoprotein	K22405	119.8	2.8e-35	DH oxidase (H2O-forming) [EC:1.6.3.4]	17.7755	0	168.029	146.378	7.16304	0	29.7374	27.0371	15.9844	1.92446	0.989684	0.0142661	0.0358168
Methanoperedens_01754	Chromosome partition protein Smc	0		1767.7	RecF/RecN/SMC N-termil domain-containing protein	K03529	111.7	4.7e-33	chromosome segregation protein	0.927807	0	15.1214	12.5807	2.38768	0	17.0905	14.8399	8.57952	1.91955	1.41567	0.0338236	0.0738867
Methanoperedens_00141	hypothetical protein	0		976.1	Phage tail sheath protein FI	K06907	528.7	6.5e-159	uncharacterized protein	129.912	139.657	1139.95	1119.35	179.076	185.303	690.113	707.438	440.483	1.91554	0.215835	1.80089e-19	3.15378e-18
Methanoperedens_01933	hypothetical protein	0	Uncharacterized protein MJ0832	1639.4	Ribonucleoside-triphosphate reductase class III catalytic subunit	K21636	755.4	1.2e-227	ribonucleoside-triphosphate reductase (formate) [EC:1.1.98.6]	88.0628	65.5964	709.922	641.332	195.79	140.381	693.19	653.567	420.732	1.91024	0.251035	9.53048e-15	1.26939e-13
Methanoperedens_00956	hypothetical protein	0		819.7	Uncharacterized protein					27.4421	30.9447	273.167	241.534	31.0398	33.6915	135.698	125.225	81.4136	1.90633	0.432461	2.96541e-06	1.67992e-05
Methanoperedens_00712	hypothetical protein	0		117.5	ATP synthase subunit C	K02124	79.2	4.8e-23	V/A-type H+/+-transporting ATPase subunit K	113.046	110.478	1116.51	957.51	23.8768	22.461	103.568	92.4955	60.6004	1.90336	0.497494	3.81711e-05	0.000187355
Methanoperedens_01122	Beta-ribofuranosylaminobenzene 5'-phosphate synthase	0	Beta-ribofuranosylaminobenzene 5'-phosphate synthase	612.5	Beta-ribofuranosylaminobenzene 5'-phosphate synthase	K06984	357.7	1.8e-107	beta-ribofuranosylaminobenzene 5'-phosphate synthase [EC:2.4.2.54]	2.73614	6.68498	62.4311	53.8726	2.38768	5.61525	23.9267	21.5484	13.3695	1.90012	1.10719	0.0215859	0.050611
Methanoperedens_01187	Tryptophan synthase beta chain 1	0	Tryptophan synthase beta chain 1	794.3	Tryptophan synthase beta chain	K01696	676.7	4.7e-204	tryptophan synthase beta chain [EC:4.2.1.20]	23.8652	15.9021	181.749	208.75	26.2645	16.8458	87.845	105.303	59.0644	1.89467	0.518964	7.88979e-05	0.000369362
Methanoperedens_01719	2-amino-3,7-dideoxy-D-threo-hept-6-ulosote synthase	0	Putative 2-amino-3,7-dideoxy-D-threo-hept-6-ulosote synthase 2	503.4	2-amino-3,7-dideoxy-D-threo-hept-6-ulosote synthase	K16306	407.8	3.3e-123	fructose-bisphosphate aldolase / 2-amino-3,7-dideoxy-D-threo-hept-6-ulosote synthase [EC:4.1.2.13 2.2.1.10]	33.9585	24.8903	260.124	311.601	23.8768	16.8458	80.3252	100.424	55.3679	1.8863	0.540474	0.000141493	0.000629178
Methanoperedens_00862	Ribonuclease BN	0		510	Metal-dependent hydrolase, beta-lactamase superfamily I	K06167	235.7	1.5e-70	phosphoribosyl 1,2-cyclic phosphate phosphodiesterase [EC:3.1.4.55]	10.435	0	111.112	96.2678	7.16304	0	33.4973	23.378	16.0096	1.87989	1.0352	0.0177438	0.0428053
Methanoperedens_00791	hypothetical protein	0	Dihydromethanophezine:CoB--CoM heterodisulfide reductase subunit D	676.8	Fe-S oxidoreductase	K08264	230.4	6.1e-69	heterodisulfide reductase subunit D [EC:1.8.98.1]	167.057	310.975	1961.2	1916	150.424	269.532	775.566	790.379	496.475	1.87789	0.334939	3.68202e-09	3.0905e-08
Methanoperedens_01674	Type 2 D topoisomerase 6 subunit A	0	Type 2 D topoisomerase 6 subunit A	738	Type 2 D topoisomerase 6 subunit A	K03166	474.7	3.5e-143	D topoisomerase VI subunit A [EC:5.6.2.2]	11.6732	17.1121	120.238	143.106	11.9384	16.8458	54.0059	66.8813	37.4178	1.87413	0.650654	0.00104027	0.00369367
Methanoperedens_00479	Tungsten-containing formylmethanofuran dehydrogese 2 subunit C	0	Tungsten-containing formylmethanofuran dehydrogese 2 subunit C	301.2	Formylmethanofuran dehydrogese	K00202	288	2.2e-86	formylmethanofuran dehydrogese subunit C [EC:1.2.7.12]	13.4768	16.4634	140.573	158.333	9.55072	11.2305	43.7516	49.8052	28.5845	1.8701	0.717068	0.00254046	0.00804386
Methanoperedens_01412	hypothetical protein	0		219.2	Uncharacterized protein					0	0	65.7505	83.2617	0	0	9.22886	12.1972	5.35651	1.8586	2.26	0.0269077	0.0612658
Methanoperedens_01792	3-octaprenyl-4-hydroxybenzoate carboxy-lyase	0	Uncharacterized protein MTH_1394	849.7	UbiD family decarboxylase	K16874	468.7	2.9e-141	2,5-furandicarboxylate decarboxylase 1	12.2444	14.9578	120.401	127.365	14.3261	16.8458	61.8675	67.6945	40.1835	1.85591	0.599965	0.000567394	0.00216357
Methanoperedens_00193	Carbamoyl-phosphate synthase large chain	0	Carbamoyl-phosphate synthase large chain	2099.7	Carbamoyl-phosphate synthase large chain	K01955	1765.7	0	carbamoyl-phosphate synthase large subunit [EC:6.3.5.5]	51.5328	53.1164	423.878	430.146	152.811	151.612	552.022	578.147	358.648	1.85587	0.231473	3.07742e-16	4.50033e-15
Methanoperedens_01188	Indole-3-glycerol phosphate synthase	0	Indole-3-glycerol phosphate synthase	477.2	Indole-3-glycerol-phosphate synthase	K01609	263.2	9.9e-79	indole-3-glycerol phosphate synthase [EC:4.1.1.48]	16.9792	8.29677	131.722	156.431	11.9384	5.61525	40.6753	50.4151	27.161	1.85183	0.744424	0.00373394	0.0112335
Methanoperedens_02884	hypothetical protein	0	Phosphate transport system permease protein PstA	510.4	Phosphate transport system permease protein PstA	K02038	255.1	2.3e-76	phosphate transport system permease protein	3.03586	7.41726	83.1239	62.0295	2.38768	5.61525	28.712	18.0925	13.7019	1.85092	1.16406	0.0249307	0.0574094
Methanoperedens_03231	Thiol:disulfide interchange protein DsbD	0		313.9	Thioredoxin domain-containing protein	K04084	61.3	1.1e-17	thioredoxin:protein disulfide reductase [EC:1.8.4.16]	39.3075	13.7195	289.2	305.61	16.7138	5.61525	54.0059	59.563	33.9745	1.84656	0.661445	0.00162312	0.00544945
Methanoperedens_01096	Cysteate synthase	0	Cysteate synthase	906	Cysteate synthase	K15527	601.3	1.5e-181	cysteate synthase [EC:2.5.1.76]	120.514	42.7415	779.32	741.24	148.036	50.5373	420.426	416.941	258.985	1.84584	0.477629	3.03476e-05	0.000151845
Methanoperedens_00370	hypothetical protein	0		497.3	Uncharacterized protein					12.5883	7.68895	109.763	120.419	9.55072	5.61525	36.5736	41.8771	23.4042	1.84398	0.78263	0.00539734	0.0154982
Methanoperedens_03039	hypothetical protein	0		1301.6	Uncharacterized protein	K06894	21.5	8.7e-06	alpha-2-macroglobulin	19.0077	12.384	131.763	162.409	35.8152	22.461	109.037	137.422	76.1838	1.84031	0.477457	3.56195e-05	0.00017605
Methanoperedens_03553	Adaptive-response sensory-kise SasA	0	Cyanobacterial phytochrome A	714.9	PAS domain S-box	K11354	376.4	7.8e-113	two-component system, chemotaxis family, sensor kise Cph1 [EC:2.7.13.3]	33.1291	43.1688	308.125	310.555	35.8152	44.922	146.294	153.685	95.1791	1.8392	0.40008	1.19247e-06	7.18264e-06
Methanoperedens_00723	hypothetical protein	0	Transcription initiation factor IIB	629	Transcription initiation factor IIB	K03124	433.3	3e-130	transcription initiation factor TFIIB	55.9209	55.8928	445.757	481.588	52.5289	50.5373	183.893	207.352	123.578	1.83096	0.361071	1.18869e-07	8.2655e-07
Methanoperedens_00824	hypothetical protein	0		418.7	Uncharacterized protein					0	0	36.2251	49.2252	0	0	8.88705	12.6038	5.37271	1.8295	2.25497	0.0274727	0.0620658
Methanoperedens_02213	hypothetical protein	0		1035.4	Uncharacterized protein					31.2717	8.04246	200.648	201.468	45.3659	11.2305	127.837	133.966	79.5998	1.82718	0.535618	0.000202103	0.000848443
Methanoperedens_01048	hypothetical protein	0	UPF0091 protein R00998	183.7	Multisubunit sodium/proton antiporter, MrpG subunit	K05571	123.8	1.2e-36	multicomponent +:H+ antiporter subunit G	0	0	68.7838	78.3926	0	0	9.57067	11.3841	5.23868	1.82433	2.22418	0.0279066	0.062934
Methanoperedens_02500	50S ribosomal protein L23	0	50S ribosomal protein L23	156	50S ribosomal protein L23	K02893	56.7	5.7e-16	large subunit ribosomal protein L23Ae	52.3871	25.5986	508.868	375.608	11.9384	5.61525	50.9296	39.2343	26.9294	1.82339	0.753929	0.00447739	0.0131767
Methanoperedens_02353	hypothetical protein	0	Probable deacetylase AF_0130	692.2	Deacetylase, histone deacetylase/acetoin utilization protein	K11407	389.1	1e-116	histone deacetylase 6 [EC:3.5.1.98]	0	18.3593	92.2608	100.497	0	16.8458	38.6245	43.9099	24.845	1.8196	1.20833	0.0172252	0.0418031
Methanoperedens_02135	[LysW]-aminoadipate semialdehyde/glutamate semialdehyde transamise	0	Acetylornithine aminotransferase	767.7	Acetylornithine aminotransferase	K00821	565.4	2.9e-170	acetylornithine/N-succinyldiaminopimelate aminotransferase [EC:2.6.1.11 2.6.1.17]	15.5804	27.1902	171.947	172.401	16.7138	28.0763	81.0088	84.7706	52.6424	1.8169	0.537499	0.000192925	0.000816906
Methanoperedens_01652	Histidine--tR ligase	0	Histidine--tR ligase	814.7	Histidine--tR ligase	K01892	392.4	7.9e-118	histidyl-tR synthetase [EC:6.1.1.21]	2.10061	10.2645	56.8313	58.9177	2.38768	11.2305	28.3702	30.493	18.1203	1.81364	0.98176	0.0145847	0.0364396
Methanoperedens_02136	Aromatic-amino-acid aminotransferase 2	0	Histidinol-phosphate aminotransferase	718.8	Histidinol-phosphate aminotransferase	K00817	364.6	2.1e-109	histidinol-phosphate aminotransferase [EC:2.6.1.9]	21.1845	34.5055	215.599	226.917	21.4891	33.6915	96.0485	105.506	64.1837	1.811	0.492171	6.20296e-05	0.000293786
Methanoperedens_02292	hypothetical protein	0		648.7	CRISPR-associated protein Csc2	K19121	217.3	6.2e-65	CRISPR-associated protein Csc2	28.6383	12.7217	177.364	237.927	26.2645	11.2305	71.4382	100.017	52.2376	1.80838	0.597683	0.000729608	0.00267084
Methanoperedens_01514	hypothetical protein	0	Uncharacterized protein MJ0805	380.6	Uncharacterized protein	K09139	230.3	2.4e-69	uncharacterized protein	22.7288	0	162.991	159.585	11.9384	0	37.599	38.6245	22.0405	1.80822	0.844269	0.00934663	0.0250865
Methanoperedens_03303	ORC1-type D replication protein	0	ORC1-type D replication protein 1	798.9	ORC1-type D replication protein	K10725	623.2	5.8e-188	archaeal cell division control protein 6	91.7538	56.0435	623.311	631.368	105.058	61.7678	313.439	331.154	202.855	1.79291	0.324372	1.17558e-08	9.18768e-08
Methanoperedens_00979	hypothetical protein	0		296.2	Uncharacterized protein					498.861	230.222	3300.96	2944.6	214.891	95.4593	624.486	581.603	379.11	1.79235	0.400237	2.22595e-06	1.28616e-05
Methanoperedens_01129	hypothetical protein	0		384.4	Nitrate reductase delta subunit	K23349	69.9	7e-20	putative dimethyl sulfoxide reductase chaperone	221.57	353.53	2118.05	2196.39	116.996	179.688	491.18	531.595	329.865	1.79125	0.294719	2.43083e-10	2.28353e-09
Methanoperedens_00105	Undecaprenyl-phosphate 4-deoxy-4-formamido-L-arabinose transferase	0	Uncharacterized protein y4gI	1979.1	Putative glycosyltransferase	K20444	494	1.2e-148	O-antigen biosynthesis protein [EC:2.4.1.-]	3.92305	3.83394	31.7132	55.0896	11.9384	11.2305	42.0426	60.1729	31.3461	1.78579	0.719398	0.00353934	0.0107162
Methanoperedens_01126	hypothetical protein	0		82.8	Uncharacterized protein					66.0884	107.645	710.892	916.59	7.16304	11.2305	33.8391	45.5362	24.4422	1.78357	0.805247	0.00692639	0.0192272
Methanoperedens_00456	hypothetical protein	0	Ras-related protein Rab-13	603.6	WD40 repeat-containing protein	K10260	200.3	8.7e-60	F-box and WD-40 domain protein 7	8.74897	21.3756	110.65	124.158	11.9384	28.0763	66.311	77.8588	46.0461	1.78281	0.616396	0.000905086	0.00324208
Methanoperedens_00073	hypothetical protein	0		490	Uncharacterized protein (Fragment)	K24473	189.6	8.3e-57	teneurin	18.5261	22.6316	141.534	178.619	76.4057	89.8441	256.357	337.456	190.016	1.782	0.353082	1.13081e-07	7.92125e-07
Methanoperedens_03385	hypothetical protein	0		248.8	Mannose-6-phosphate isomerase	K14673	45.9	8.9e-13	putative monooxygese	20.4559	16.6594	226.706	184.916	7.16304	5.61525	34.8646	29.6799	19.3307	1.78019	0.855191	0.0107346	0.0282506
Methanoperedens_00866	Pyruvate synthase subunit PorD	0	Ketoisovalerate oxidoreductase subunit VorD	138.7	2-oxoacid:acceptor oxidoreductase, delta subunit, pyruvate/2-ketoisovalerate family	K00171	119.2	3e-35	pyruvate ferredoxin oxidoreductase delta subunit [EC:1.2.7.1]	0	24.1274	138.415	177.928	0	5.61525	14.6978	19.5155	9.95715	1.77674	1.43615	0.0338311	0.0738867
Methanoperedens_01935	Arginine--tR ligase	0	Arginine--tR ligase	1113.2	Arginine--tR ligase	K01887	481.8	1e-144	arginyl-tR synthetase [EC:6.1.1.19]	42.5773	18.576	269.144	280.474	66.855	28.0763	185.603	201.864	120.599	1.77588	0.423197	9.34551e-06	4.98369e-05
Methanoperedens_00721	hypothetical protein	0	Uncharacterized ABC transporter permease MJ1507	755.4	ABC-type transport system, involved in lipoprotein release, permease component	K02004	63.7	2e-18	putative ABC transport system permease protein	0	0	22.932	18.2156	0	0	11.2797	9.35119	5.15773	1.76548	2.18465	0.0294298	0.0658976
Methanoperedens_01166	hypothetical protein	1		223.4	Uncharacterized protein					37.682	36.826	324.266	365.366	11.9384	11.2305	45.1188	53.0578	30.3364	1.75824	0.680085	0.00290957	0.00906087
Methanoperedens_02652	Anti-sigma F factor	0	Serine/threonine-protein kise RsbT	263.1	Anti-sigma regulatory factor (Ser/Thr protein kise)	K17752	177.4	6.1e-53	serine/threonine-protein kise RsbT [EC:2.7.11.1]	0	0	67.8905	56.8219	0	0	10.9379	9.55448	5.12309	1.75811	2.1751	0.0296955	0.0663878
Methanoperedens_01016	Ni-sirohydrochlorin a,c-diamide reductive cyclase complex, component CfbC	0	Ni-sirohydrochlorin a,c-diamide reductive cyclase complex, component CfbC	518.8	Nitrogese subunit NifH (ATPase)	K21610	443	5.3e-134	Ni-sirohydrochlorin a,c-diamide reductive cyclase subunit CfbC [EC:6.3.3.7]	39.0522	7.95107	251.407	241.191	28.6522	5.61525	81.0088	81.1114	49.0969	1.75615	0.602433	0.00114449	0.0040135
Methanoperedens_00230	Sensor histidine kise RcsC	0	Sensor kise CckA	1988.8	PAS domain S-box	K13587	596.8	9.5e-180	two-component system, cell cycle sensor histidine kise and response regulator CckA [EC:2.7.13.3]	26.1627	8.24787	155.154	160.839	74.0181	22.461	192.781	208.369	124.407	1.75361	0.496434	0.000129309	0.000584157
Methanoperedens_01583	Molybdenum cofactor guanylyltransferase	0	Probable molybdenum cofactor guanylyltransferase	382.9	Probable molybdenum cofactor guanylyltransferase	K03752	156.8	1.3e-46	molybdenum cofactor guanylyltransferase [EC:2.7.7.77]	8.26105	0	92.9006	72.1201	4.77536	0	23.5849	17.4827	11.4607	1.75166	1.16059	0.0348513	0.0758812
Methanoperedens_02248	Cobalt transport protein CbiM	0	Putative metal transport protein MJ1569	453.4	ABC-type Co2+ transport system, permease component	K02007	257.3	4.8e-77	cobalt/nickel transport system permease protein	222.875	263.483	1517.42	2198.8	148.036	168.458	442.643	669.423	357.14	1.74533	0.348566	1.35515e-07	9.35417e-07
Methanoperedens_01862	hypothetical protein	0		230.3	Uncharacterized protein					20.6196	83.9633	398.789	404.707	7.16304	28.0763	60.8421	64.0353	40.0292	1.74453	0.719003	0.0031798	0.00976308
Methanoperedens_00023	hypothetical protein	0		617.1	S-layer like family, C-termil region					5.36968	6.55964	53.3842	83.2834	4.77536	5.61525	20.8504	33.9489	16.2975	1.74325	1.01464	0.0210739	0.0496154
Methanoperedens_02262	hypothetical protein	0		734.9	Polysulfide reductase	K00185	162.7	2.7e-48	dimethyl sulfoxide reductase membrane subunit	28.6383	53.8226	283.639	311.804	31.0398	56.1525	135.015	154.904	94.2779	1.7215	0.442452	2.45157e-05	0.000124643
Methanoperedens_00239	tR (cytidine(56)-2'-O)-methyltransferase	0	tR (cytidine(56)-2'-O)-methyltransferase	355.1	tR (cytidine(56)-2'-O)-methyltransferase	K07254	262.1	1.5e-78	tR (cytidine56-2'-O)-methyltransferase [EC:2.1.1.206]	0	11.9266	79.5592	68.9117	0	5.61525	17.0905	15.4498	9.53888	1.72048	1.4084	0.0370428	0.0797954
Methanoperedens_01756	hypothetical protein	0		770	Uncharacterized protein					2.1641	5.28736	36.6814	47.8353	2.38768	5.61525	17.7741	24.1911	12.492	1.71388	1.12776	0.031956	0.070717
Methanoperedens_03212	hypothetical protein	0	Uncharacterized protein YunC	183.3	Uncharacterized protein					0	0	90.4323	88.1042	0	0	10.5961	9.55448	5.03764	1.70959	2.13814	0.0311099	0.0691683
Methanoperedens_01714	50S ribosomal protein L13	0	50S ribosomal protein L13	270	50S ribosomal protein L13	K02871	81.7	1.2e-23	large subunit ribosomal protein L13	85.9149	44.9804	558.096	591.604	33.4275	16.8458	95.3648	105.506	62.786	1.70486	0.486901	0.000161638	0.000699357
Methanoperedens_00247	hypothetical protein	0		867.1	Transposase, IS605 OrfB family, central region	K07496	147.4	1.5e-43	putative transposase	46.715	69.4732	442.251	385.947	54.9166	78.6135	228.329	208.166	142.506	1.69866	0.348391	2.87284e-07	1.90872e-06
Methanoperedens_02980	hypothetical protein	0		121.3	Uncharacterized protein, 4-oxalocrotote tautomerase	K01821	55.1	2.2e-15	4-oxalocrotote tautomerase [EC:5.3.2.6]	93.9694	65.5964	647.612	802.912	16.7138	11.2305	50.5878	65.4583	35.9976	1.69523	0.638756	0.00247413	0.00786894
Methanoperedens_00015	hypothetical protein	0		780.8	Uncharacterized protein	K07251	22.9	9.2e-06	thiamine kise [EC:2.7.1.89]	2.22577	0	29.7461	29.3537	2.38768	0	14.0142	14.4334	7.70881	1.69359	1.38846	0.0462116	0.0958351
Methanoperedens_02039	Ribonuclease J	0	Uncharacterized protein MJ1236	1290	KH-domain/beta-lactamase-domain protein	K07041	972.6	5e-293	uncharacterized protein	78.1044	121.734	716.801	684.864	138.485	207.764	557.833	556.802	365.221	1.69341	0.277054	2.17688e-10	2.06548e-09
Methanoperedens_01850	hypothetical protein	0		428.7	HEPN_RiboL-PSP domain-containing protein					12.0441	0	83.7528	102.91	7.16304	0	21.8758	28.0536	14.2731	1.68427	1.01616	0.0274779	0.0620658
Methanoperedens_00167	hypothetical protein	0	UPF0104 membrane protein MJ1595	656.8	Uncharacterized protein	K07027	120.8	1.5e-35	glycosyltransferase 2 family protein	2.5195	12.3113	57.4879	74.8786	2.38768	11.2305	23.9267	32.5259	17.5177	1.68364	1.01259	0.0215792	0.050611
Methanoperedens_00045	UDP-3-O-(3-hydroxymyristoyl)glucosamine N-acyltransferase	0		349	Serine acetyltransferase	K13018	50.5	3.6e-14	UDP-2-acetamido-3-amino-2,3-dideoxy-glucurote N-acetyltransferase [EC:2.3.1.201]	13.8572	25.3921	141.153	173.098	9.55072	16.8458	42.7262	54.6841	30.9517	1.67906	0.703248	0.0046471	0.0135966
Methanoperedens_01691	GDP-L-fucose synthase	0	UDP-glucuronic acid decarboxylase 1	633.3	Nucleoside-diphosphate-sugar epimerase	K08678	544.3	8.1e-164	UDP-glucurote decarboxylase [EC:4.1.1.35]	16.5752	33.7473	174.692	212.951	14.3261	28.0763	66.311	76.0292	46.1857	1.66893	0.580249	0.00110021	0.00388705
Methanoperedens_03081	hypothetical protein	0		118.2	hypothetical protein					28.1688	0	202.002	329.634	4.77536	0	15.0396	25.6141	11.3573	1.66843	1.20922	0.0419438	0.0884717
Methanoperedens_01041	hypothetical protein	0		414.8	Uncharacterized protein					20.2629	29.704	212.678	185.179	11.9384	16.8458	55.0313	50.0085	33.456	1.66843	0.638767	0.00272635	0.00853715
Methanoperedens_01182	D repair protein NreB	0	D repair protein NreA	847.4	D repair protein	K22585	554.4	5.1e-167	D repair protein NreA	4.12062	0	35.5937	38.2698	4.77536	0	18.1159	20.3287	10.805	1.66793	1.13496	0.0400629	0.0850101
Methanoperedens_01008	hypothetical protein	0	Type I restriction enzyme EcoAI R protein	1591.2	Helicase, type I site-specific restriction-modification system restriction subunit	K01153	347	6.9e-104	type I restriction enzyme, R subunit [EC:3.1.21.3]	13.0504	10.6283	98.9031	91.1048	28.6522	22.461	95.3648	91.2757	59.4384	1.66195	0.472929	0.00015361	0.000671483
Methanoperedens_02192	Thermosome subunit alpha	0	Thermosome subunit alpha	1041.2	Thermosome subunit	K22447	705.8	6.7e-213	archaeal chaperonin	105.042	76.6089	696.543	655.813	159.975	112.305	465.886	457.802	298.992	1.65763	0.264569	1.46888e-10	1.41261e-09
Methanoperedens_03258	Phosphoribosylamine--glycine ligase	0	Phosphoribosylamine--glycine ligase	936.4	Glycimide ribonucleotide synthetase	K01945	321.1	2.1e-96	phosphoribosylamine---glycine ligase [EC:6.3.4.13]	18.3972	8.98965	118.136	126.438	23.8768	11.2305	67.3365	75.0128	44.3641	1.65565	0.560987	0.00109761	0.00388271
Methanoperedens_01856	3',5'-cyclic adenosine monophosphate phosphodiesterase CpdA	0		865.5	D repair exonuclease	K03547	179.9	2e-53	D repair protein SbcD/Mre11	21.4787	28.6239	184.577	179.896	26.2645	33.6915	99.1247	100.83	64.9777	1.65184	0.458534	0.000100324	0.000460549
Methanoperedens_02635	D gyrase subunit A	0	D gyrase subunit A	1617.8	D gyrase subunit A	K02469	1383.8	0	D gyrase subunit A [EC:5.6.2.2]	33.9138	35.1521	264.639	235.178	78.7934	78.6135	270.029	246.587	168.506	1.65057	0.305098	2.1014e-08	1.59298e-07
Methanoperedens_01474	hypothetical protein	0		523.9	Uncharacterized protein					9.61734	0	66.8772	78.6015	7.16304	0	21.8758	26.8338	13.9682	1.64924	1.00907	0.0295247	0.066058
Methanoperedens_01456	hypothetical protein	0		341.3	Uncharacterized protein					39.5011	36.1911	275.22	344.85	19.1014	16.8458	58.4494	76.4358	42.7081	1.64719	0.588379	0.00160898	0.00540837
Methanoperedens_01309	hypothetical protein	0	Type I restriction enzyme EcoKI R protein	1818.1	Helicase, type I site-specific restriction-modification system restriction subunit	K01153	335.9	1.6e-100	type I restriction enzyme, R subunit [EC:3.1.21.3]	3.72329	2.2742	25.4865	38.3834	9.55072	5.61525	28.712	42.2836	21.5404	1.64034	0.832941	0.0142143	0.0357599
Methanoperedens_02882	hypothetical protein	0	Phosphate-binding protein PstS	656	ABC-type phosphate transport system, periplasmic component	K02040	161.9	5.7e-48	phosphate transport system substrate-binding protein	44.2592	19.0826	291.929	250.016	40.5905	16.8458	117.582	104.896	69.9787	1.63972	0.482975	0.000247988	0.00102857
Methanoperedens_03379	hypothetical protein	0		276.6	Uncharacterized protein					54.8393	29.7742	375.384	366.706	21.4891	11.2305	64.602	65.8649	40.7966	1.63885	0.568747	0.0013898	0.00476191
Methanoperedens_00098	hypothetical protein	0	Probable low-salt glycan biosynthesis epimerase Agl13	338.2	dTDP-4-dehydrorhamnose 3,5-epimerase-like enzyme	K01790	70.5	2.7e-20	dTDP-4-dehydrorhamnose 3,5-epimerase [EC:5.1.3.13]	10.7394	13.1193	105.018	146.619	4.77536	5.61525	20.5086	29.8831	15.1956	1.63649	0.986566	0.0262828	0.0599873
Methanoperedens_01014	Cobyrite a,c-diamide synthase	0	Cobyrite a,c-diamide synthase	948.3	Cobyrite a,c-diamide synthase	K22012	783.2	1.7e-236	Ni-sirohydrochlorin a,c-diamide synthase [EC:6.3.5.12]	34.008	4.37309	191.95	182.525	45.3659	5.61525	112.455	110.588	68.5061	1.63402	0.666475	0.00424475	0.012623
Methanoperedens_01060	30S ribosomal protein S4	0	30S ribosomal protein S4	396.7	30S ribosomal protein S4	K02986	76.6	4.8e-22	small subunit ribosomal protein S4	223.379	83.9633	1400.24	1094.75	124.159	44.922	341.809	278.503	197.348	1.63336	0.477635	0.000199713	0.000843135
Methanoperedens_00363	Dihydromethanophezine:CoB--CoM heterodisulfide reductase subunit E	0	Dihydromethanophezine:CoB--CoM heterodisulfide reductase subunit E	546.2	Uncharacterized protein	K08265	200.8	5.3e-60	heterodisulfide reductase subunit E [EC:1.8.98.1]	37.7648	38.4447	270.816	302.218	28.6522	28.0763	90.2377	105.099	63.0163	1.62929	0.471579	0.000183733	0.000786202
Methanoperedens_00302	hypothetical protein	0	Peptidyl-lysine N-acetyltransferase PatZ	1825.1	Acetate--CoA ligase (ADP-forming)	K09181	1167.9	0	acetyltransferase	4.65411	11.371	63.7163	59.4769	11.9384	28.0763	71.78	59.3597	42.7886	1.62403	0.626014	0.002491	0.00791374
Methanoperedens_03313	F(420)H(2) dehydrogese subunit I	0	DH-quinone oxidoreductase subunit I	253.8	DH-quinone oxidoreductase, chain I	K00338	161.9	5.4e-48	DH-quinone oxidoreductase subunit I [EC:7.1.1.2]	18.5428	30.2026	195.429	208.953	7.16304	11.2305	33.1555	36.9982	22.1368	1.61765	0.778892	0.0113055	0.0294794
Methanoperedens_02975	hypothetical protein	0		155.6	Uncharacterized protein					33.4733	0	309.144	203.108	7.16304	0	29.0538	19.9221	14.0347	1.61507	1.03989	0.0334086	0.0732459
Methanoperedens_02837	Short chain isoprenyl diphosphate synthase	0	Short chain isoprenyl diphosphate synthase	581.6	Geranylgeranyl pyrophosphate synthase	K02523	221.7	4.3e-66	octaprenyl-diphosphate synthase [EC:2.5.1.90]	33.8026	68.8224	310.349	392.422	28.6522	56.1525	115.532	152.465	88.2003	1.61269	0.495439	0.000287687	0.00117457
Methanoperedens_03369	D-binding protein	0	D-binding protein Mthe_1571	181	D-binding protein ANME2D_00911	K06875	103.1	2.7e-30	programmed cell death protein 5	314.51	206.16	2132.87	1762.56	97.8949	61.7678	291.563	251.466	175.673	1.61219	0.338374	7.14641e-07	4.48548e-06
Methanoperedens_01169	Glutamate N-acetyltransferase	0	Arginine biosynthesis bifunctiol protein ArgJ	763.8	Arginine biosynthesis bifunctiol protein ArgJ	K00620	497.4	1.2e-149	glutamate N-acetyltransferase / amino-acid N-acetyltransferase [EC:2.3.1.35 2.3.1.1]	2.11613	25.8508	117.951	115.562	2.38768	28.0763	58.4494	58.9531	36.9666	1.60786	0.973007	0.0169464	0.0411619
Methanoperedens_01967	hypothetical protein	0		203.4	DrsE domain-containing protein	K07235	50.5	3.4e-14	tR 2-thiouridine synthesizing protein D [EC:2.8.1.-]	102.077	83.132	737.553	690.481	28.6522	22.461	90.9213	88.8363	57.7177	1.60666	0.473541	0.00024906	0.00103151
Methanoperedens_01165	hypothetical protein	0		174.9	Uncharacterized protein					37.3543	0	228.3	274.07	9.55072	0	25.6357	31.916	16.7756	1.59836	0.930062	0.0256691	0.0587758
Methanoperedens_02885	Vitamin B12 import ATP-binding protein BtuD	0	Phosphate import ATP-binding protein PstB	675.2	Phosphate import ATP-binding protein PstB	K02036	400.9	7.8e-121	phosphate transport system ATP-binding protein [EC:7.3.2.1]	12.8615	18.854	114.87	131.873	11.9384	16.8458	46.8279	53.6677	32.3199	1.59777	0.645004	0.00414326	0.0123731
Methanoperedens_02856	hypothetical protein	0	UPF0014 membrane protein STAR2	460.3	ABC-type uncharacterized transport system, permease component	K02069	239.6	1.3e-71	putative ABC transport system permease protein	6.58352	0	61.16	53.195	4.77536	0	19.4831	17.4827	10.4353	1.59649	1.13026	0.0457126	0.0949391
Methanoperedens_01128	Respiratory nitrate reductase subunit beta	0	Selete reductase subunit beta	829.3	Nitrate reductase beta subunit	K00371	303.3	9.3e-91	nitrate reductase / nitrite oxidoreductase, beta subunit [EC:1.7.5.1 1.7.99.-]	323.311	430.864	2465.9	2514.72	341.438	437.99	1143.69	1217.28	785.101	1.59636	0.2136	2.01645e-14	2.62416e-13
Methanoperedens_02611	hypothetical protein	0		918.3	Single-stranded D-specific exonuclease	K07462	191	7e-57	single-stranded-D-specific exonuclease [EC:3.1.-.-]	18.6772	4.56322	101.67	118.995	23.8768	5.61525	57.0822	69.7273	39.0754	1.59407	0.643132	0.00446201	0.0131451
Methanoperedens_01995	Siroheme synthase	0	Cobalt-precorrin-4 C(11)-methyltransferase	872.8	Precorrin-4 C11-methyltransferase	K05936	349.1	7.5e-105	precorrin-4/cobalt-precorrin-4 C11-methyltransferase [EC:2.1.1.133 2.1.1.271]	15.4802	56.732	270.587	236.502	19.1014	67.383	146.636	133.763	91.7208	1.59326	0.61753	0.00216448	0.00697798
Methanoperedens_02682	hypothetical protein	0		405.2	CRISPR-associated exonuclease Cas4	K07464	95.8	3.8e-28	CRISPR-associated exonuclease Cas4 [EC:3.1.12.1]	0	0	42.6469	36.4534	0	0	10.2543	9.1479	4.85055	1.59107	2.04403	0.0349615	0.0760628
Methanoperedens_01307	5'-deoxyadenosine deamise	0	5'-deoxyadenosine deamise	832.8	5'-deoxyadenosine deamise	K12960	476.2	3.6e-143	5-methylthioadenosine/S-adenosylhomocysteine deamise [EC:3.5.4.31 3.5.4.28]	8.24124	0	47.0105	64.6759	9.55072	0	23.9267	34.3555	16.9582	1.59064	0.959601	0.0279908	0.0630237
Methanoperedens_00109	ADP-L-glycero-D-manno-heptose-6-epimerase	0	UDP-glucurote 4-epimerase	742.7	Nucleoside-diphosphate-sugar epimerase	K12454	416.7	1.3e-125	CDP-paratose 2-epimerase [EC:5.1.3.10]	16.941	11.8258	106.497	137.558	16.7138	11.2305	46.1443	62.2057	34.0736	1.58346	0.65032	0.00485596	0.0141226
Methanoperedens_02114	VCP-like ATPase	0	Cell division cycle protein 48 homolog AF_1297	1481.1	AAA family ATPase, CDC48 subfamily	K13525	962.6	4e-290	transitiol endoplasmic reticulum ATPase	43.1847	22.2125	255.6	240.011	90.7318	44.922	235.849	231.137	150.66	1.58238	0.371938	8.22195e-06	4.41774e-05
Methanoperedens_02795	Aspartate--tR(Asp/Asn) ligase	0	Aspartate--tR(Asp/Asn) ligase	872.1	Aspartate--tR(Asp/Asn) ligase	K09759	593.3	9.2e-179	nondiscrimiting aspartyl-tR synthetase [EC:6.1.1.23]	27.7785	24.2388	186.268	196.441	33.4275	28.0763	98.4411	108.149	67.0234	1.57561	0.444996	0.000145286	0.000644026
Methanoperedens_01600	UDP-N-acetylglucosamine 2-epimerase	0	UDP-N-acetylglucosamine 2-epimerase	733.8	UDP-N-acetylglucosamine 2-epimerase	K24258	490.7	4.5e-148	UDP-N-acetyl-L-fucosamine synthase [EC:5.1.3.28]	7.12002	11.5971	65.7572	92.5769	7.16304	11.2305	29.0538	41.2672	22.1786	1.57408	0.81745	0.0153844	0.0381516
Methanoperedens_01786	3-isopropylmalate/3-methylmalate dehydrogese	0	3-isopropylmalate dehydrogese	764.2	Isocitrate/isopropylmalate dehydrogese	K07246	459.7	1.3e-138	tartrate dehydrogese/decarboxylase / D-malate dehydrogese [EC:1.1.1.93 4.1.1.73 1.1.1.83]	52.5543	72.5747	461.782	370.95	54.9166	72.9983	211.922	177.673	129.377	1.56912	0.365903	5.47557e-06	3.00468e-05
Methanoperedens_02369	Digeranylgeranylglycerophospholipid reductase	0	Digeranylgeranylglycerophospholipid reductase	751.9	Geranylgeranyl reductase family protein	K17830	311	2.5e-93	digeranylgeranylglycerophospholipid reductase [EC:1.3.1.101 1.3.7.11]	11.5788	5.65791	80.7686	82.1583	11.9384	5.61525	36.5736	38.8278	23.2388	1.56711	0.733493	0.0110769	0.0290167
Methanoperedens_00607	hypothetical protein	0	Oxalate decarboxylase OxdD	201.4	Cupin domain-containing protein	K14673	61.9	1e-17	putative monooxygese	0	18.9107	113.533	104.952	0	5.61525	15.3814	14.8399	8.95915	1.56479	1.37726	0.0456379	0.0948534
Methanoperedens_00484	hypothetical protein	0		547.7	Uncharacterized protein					0	0	33.3904	26.3929	0	0	10.5961	8.74133	4.83436	1.56235	2.02382	0.0358671	0.0779415
Methanoperedens_02633	hypothetical protein	0		209.1	Putative nucleotidyltransferase	K07076	56.1	8.8e-16	uncharacterized protein	16.2104	0	134.74	138.508	4.77536	0	17.4323	18.7024	10.2275	1.56128	1.12631	0.0487684	0.099896
Methanoperedens_03382	Dihydromethanophezine:CoB--CoM heterodisulfide reductase subunit D	0		730.3	Fe-S oxidoreductase	K18210	196	1.7e-58	fumarate reductase (CoM/CoB) subunit B [EC:1.3.4.1]	59.7669	12.1686	344.175	283.09	57.3043	11.2305	144.927	124.411	84.4684	1.56116	0.608745	0.00333261	0.0101553
Methanoperedens_02817	hypothetical protein	0		807.7	Uncharacterized protein					29.3368	35.838	223.356	221.084	33.4275	39.3068	111.772	115.67	75.044	1.56032	0.420037	7.03966e-05	0.000330654
Methanoperedens_00990	hypothetical protein	0		426	Uncharacterized protein					19.0922	18.6585	139.402	168.805	11.9384	11.2305	38.2827	48.3822	27.4585	1.55388	0.695675	0.00830073	0.0225783
Methanoperedens_01220	3',5'-cyclic adenosine monophosphate phosphodiesterase CpdA	0	Uncharacterized protein MJ1162	423.3	Putative phosphoesterase, ICC	K07096	221	3.5e-66	uncharacterized protein	24.6646	30.1304	176.873	241.286	14.3261	16.8458	45.1188	64.2386	35.1323	1.55073	0.656093	0.00558246	0.0159652
Methanoperedens_00139	hypothetical protein	0		250.4	Uncharacterized protein					251.458	221.854	1568.73	1672.4	85.9565	72.9983	235.507	262.037	164.125	1.55036	0.30891	1.98185e-07	1.34189e-06
Methanoperedens_00584	hypothetical protein	0		442.2	Uncharacterized protein	K14615	25.8	7e-07	gastric intrinsic factor	3.65595	0	42.901	49.5732	2.38768	0	12.3051	14.2301	7.23072	1.54811	1.36756	0.05638	0.113119
Methanoperedens_03115	D-directed R polymerase subunit A''	0	D-directed R polymerase subunit A''	691	D-directed R polymerase subunit A''	K03042	572.5	1.2e-172	D-directed R polymerase subunit A" [EC:2.7.7.6]	60.7252	54.9498	384.15	412.748	64.4673	56.1525	179.108	200.847	125.144	1.54791	0.343268	2.43484e-06	1.39548e-05
Methanoperedens_02590	CRISPR-associated nuclease/helicase Cas3	0	Putative CRISPR-associated nuclease/helicase Cas3	1697.2	CRISPR-associated helicase Cas3/CRISPR-associated endonuclease Cas3-HD	K07012	311	3.5e-93	CRISPR-associated endonuclease/helicase Cas3 [EC:3.1.-.- 3.6.4.-]	10.3015	0	51.04	61.2316	23.8768	0	51.955	64.8485	35.1701	1.54783	0.810855	0.0166828	0.0406958
Methanoperedens_02283	hypothetical protein	0		694.1	SIR2_2 domain-containing protein					0	0	20.4117	25.1242	0	0	8.54524	10.7742	4.82986	1.54682	2.01443	0.0362919	0.0785356
Methanoperedens_00377	hypothetical protein	0		599	4-hydroxybenzoate polyprenyltransferase-like prenyltransferase	K17105	70.2	2.7e-20	geranylgeranylglycerol-phosphate geranylgeranyltransferase [EC:2.5.1.42]	5.30339	0	40.6243	49.2546	4.77536	0	16.065	20.1254	10.2414	1.54658	1.13866	0.0504753	0.102754
Methanoperedens_03279	ATP phosphoribosyltransferase	0	ATP phosphoribosyltransferase	560.1	ATP phosphoribosyltransferase	K00765	271.3	3.4e-81	ATP phosphoribosyltransferase [EC:2.4.2.17]	32.4764	14.4267	204.984	185.908	26.2645	11.2305	72.8054	68.9142	44.8036	1.54641	0.548794	0.0018067	0.00596696
Methanoperedens_01532	Aromatic-amino-acid aminotransferase 2	0	Aspartate aminotransferase	746.5	Aminotransferase	K00812	498.8	4.8e-150	aspartate aminotransferase [EC:2.6.1.1]	42.9574	38.6673	290.366	281.373	45.3659	39.3068	134.673	136.202	88.8869	1.54569	0.383989	2.15876e-05	0.00011035
Methanoperedens_00104	hypothetical protein	0		726.9	Methylase involved in ubiquinone/mequinone biosynthesis	K07755	61.3	1.6e-17	arsenite methyltransferase [EC:2.1.1.137]	16.8934	11.7926	124.291	109.378	16.7138	11.2305	54.0059	49.602	32.888	1.53868	0.614676	0.00439612	0.0129915
Methanoperedens_00695	hypothetical protein	0		934.9	Uncharacterized protein					14.877	4.54347	85.4693	91.5368	19.1014	5.61525	48.1951	53.871	31.6957	1.53016	0.654837	0.00695363	0.0192839
Methanoperedens_02582	Potassium-transporting ATPase ATP-binding subunit	0	Calcium-transporting ATPase	1695.2	P-type ATPase, translocating	K01537	995.2	6.7e-300	P-type Ca2+ transporter type 2C [EC:7.2.2.10]	0.955672	0	10.2799	14.3786	2.38768	0	11.2797	15.4498	7.2793	1.5287	1.38107	0.05766	0.115279
Methanoperedens_00708	V-type ATP synthase alpha chain	0	V-type ATP synthase alpha chain	1156.7	V-type ATP synthase alpha chain	K02117	949.6	1.1e-286	V/A-type H+/+-transporting ATPase subunit A [EC:7.1.2.2 7.2.2.1]	146.901	119.637	892.865	877.304	236.38	185.303	630.98	647.062	424.931	1.52798	0.225457	5.20503e-12	5.6147e-11
Methanoperedens_00435	S-adenosylmethionine:tR ribosyltransferase-isomerase	0	S-adenosylmethionine:tR ribosyltransferase-isomerase	674.9	S-adenosylmethionine:tR ribosyltransferase-isomerase	K07568	425.1	5e-128	S-adenosylmethionine:tR ribosyltransferase-isomerase [EC:2.4.99.17]	20.517	0	114.527	110.042	19.1014	0	46.8279	46.9592	28.2221	1.52777	0.788274	0.0168784	0.0410317
Methanoperedens_01643	hypothetical protein	0		123.2	Uncharacterized protein					0	31.8043	152.754	229.706	0	5.61525	12.3051	19.3122	9.30816	1.52662	1.41619	0.0465171	0.0962574
Methanoperedens_03315	hypothetical protein	0		153.3	Uncharacterized protein	K05578	39.8	5.2e-11	D(P)H-quinone oxidoreductase subunit 6 [EC:7.1.1.2]	0	0	79.0725	103.261	0	0	8.20343	11.1808	4.84605	1.52522	2.00329	0.0368731	0.0794901
Methanoperedens_01163	putative respiratory nitrate reductase subunit cytochrome b-561	0	Cytochrome b6	441.8	Cytochrome b subunit of the bc complex	K02635	299.3	3.8e-90	cytochrome b6	23.3253	66.4868	285.117	291.73	14.3261	39.3068	76.9071	82.3311	53.2178	1.525	0.5874	0.00252745	0.00801159
Methanoperedens_01793	Flavin prenyltransferase PAD1, mitochondrial	0	Flavin prenyltransferase UbiX	364.8	Flavin prenyltransferase UbiX	K03186	307.6	2.5e-92	flavin prenyltransferase [EC:2.5.1.129]	13.7831	0	92.8502	99.8473	7.16304	0	21.1922	23.7845	13.0349	1.52444	0.99697	0.0390148	0.08339
Methanoperedens_01050	hypothetical protein	0		186	Uncharacterized protein	K14117	49.5	7.2e-14	energy-converting hydrogese B subunit H	0	0	76.1001	90.2002	0	0	8.54524	10.5709	4.77904	1.52291	1.9909	0.0372566	0.080195
Methanoperedens_03202	hypothetical protein	0		444.1	Uncharacterized protein					0	9.45533	56.7665	53.195	0	5.61525	15.3814	14.2301	8.80669	1.51884	1.36792	0.0485879	0.0995981
Methanoperedens_00389	hypothetical protein	0		229.9	Acylphosphatase	K01512	25.2	2.5e-06	acylphosphatase [EC:3.6.1.7]	74.7086	57.0403	485.518	458.807	38.2029	28.0763	109.037	107.539	70.7138	1.51739	0.426394	0.000145716	0.000644925
Methanoperedens_00704	hypothetical protein	0		313.5	Uncharacterized protein					5.6523	0	62.6424	75.5929	2.38768	0	11.6215	14.6366	7.16146	1.51429	1.36729	0.0589567	0.117376
Methanoperedens_01544	Undecaprenyl-phosphate 4-deoxy-4-formamido-L-arabinose transferase	0	Uncharacterized protein MJ1222	1099.3	Glycosyl transferase	K00721	132.3	4.5e-39	dolichol-phosphate mannosyltransferase [EC:2.4.1.83]	67.0479	60.9534	446.248	400.266	102.67	89.8441	300.109	280.739	193.34	1.51277	0.281398	3.00864e-08	2.22859e-07
Methanoperedens_03090	hypothetical protein	0		161.8	Uncharacterized protein					41.9097	0	297.124	313.331	9.55072	0	29.7374	24.801	16.0223	1.51158	0.923857	0.0320341	0.0708346
Methanoperedens_02519	50S ribosomal protein L15	0	50S ribosomal protein L15	286.6	50S ribosomal protein L15	K02900	48.2	1.9e-13	large subunit ribosomal protein L27Ae	197.83	41.4293	947.005	1011.05	83.5688	16.8458	175.69	195.765	117.967	1.50728	0.618295	0.00471887	0.0137873
Methanoperedens_00716	Cobyric acid synthase	0	Probable cobyric acid synthase	968	Probable cobyric acid synthase	K02232	693.1	1.4e-208	adenosylcobyric acid synthase [EC:6.3.5.10]	12.4514	4.34593	76.5349	74.3408	16.7138	5.61525	45.1188	45.7395	28.2968	1.50394	0.669494	0.00896695	0.0242278
Methanoperedens_03301	hypothetical protein	0	D polymerase II small subunit	993	D polymerase II small subunit	K02323	635.3	1.3e-191	D polymerase II small subunit [EC:2.7.7.7]	36.7729	24.5029	222.84	211.124	52.5289	33.6915	139.8	138.235	91.0639	1.49722	0.388571	4.78382e-05	0.000230148
Methanoperedens_00245	hypothetical protein	0		283.9	Uncharacterized protein					11.8503	57.9057	235.627	239.928	4.77536	22.461	41.7008	44.3165	28.3134	1.4957	0.806393	0.0158967	0.0391825
Methanoperedens_03388	hypothetical protein	0		231.1	Uncharacterized protein					0	0	90.9558	69.5627	0	0	12.9888	7.31832	5.07677	1.49557	2.01408	0.0367842	0.0794193
Methanoperedens_02886	hypothetical protein	0		644	Uncharacterized protein					18.3355	19.1989	128.925	149.368	16.7138	16.8458	51.6132	59.9696	36.2856	1.49373	0.589674	0.00400976	0.0120123
Methanoperedens_01324	hypothetical protein	0	Uncharacterized protein MJ1365	1003	Pheromone shutdown-related protein TraB	K09973	24	3.5e-06	uncharacterized protein	34.4315	20.0294	193.468	214.709	50.1413	28.0763	123.735	133.763	83.9288	1.49158	0.415858	0.000136611	0.000611301
Methanoperedens_02591	hypothetical protein	0		483.4	Uncharacterized protein					7.07118	0	64.5379	51.2248	4.77536	0	19.1413	15.8564	9.94326	1.49007	1.12805	0.0556795	0.112086
Methanoperedens_00140	hypothetical protein	0		298.9	Conserved hypothetical phage tail region protein					139.321	113.464	891.235	822.725	57.3043	44.922	160.992	155.108	104.582	1.48981	0.358192	1.29214e-05	6.7885e-05
Methanoperedens_01615	hypothetical protein	0		117.5	Uncharacterized protein					268.484	163.991	1535.89	1568.42	47.7536	28.0763	119.975	127.867	80.9181	1.48744	0.415552	0.000140713	0.000626693
Methanoperedens_03181	Methyl-coenzyme M reductase subunit beta	0	Methyl-coenzyme M reductase subunit beta	846.3	Methyl-coenzyme M reductase subunit beta	K00401	682.1	6.1e-206	methyl-coenzyme M reductase beta subunit [EC:2.8.4.1]	9644.19	9694.39	57684.8	61596.1	11659	11281	30625.8	34132.4	21924.6	1.48663	0.137031	8.61208e-28	2.39534e-26
Methanoperedens_00168	hypothetical protein	0		209.9	Uncharacterized protein					7.28092	0	75.9453	101.431	2.38768	0	10.9379	15.2465	7.14302	1.485	1.37219	0.06115	0.120558
Methanoperedens_02274	Thioredoxin	1		164.1	Alkyl hydroperoxide reductase, large subunit	K18917	28.1	3.2e-07	mycoredoxin [EC:1.20.4.3]	0	0	80.9778	101.904	0	0	8.20343	10.7742	4.74441	1.48355	1.9601	0.0387256	0.0829167
Methanoperedens_00980	hypothetical protein	0		596.3	Uncharacterized protein					335.735	320.976	2187.37	1935.55	384.416	353.761	1099.94	1015.82	713.486	1.48331	0.188218	1.28629e-15	1.80653e-14
Methanoperedens_01515	Isoleucine--tR ligase	0	Isoleucine--tR ligase	2166.3	Isoleucine--tR ligase	K01870	1043.1	0	isoleucyl-tR synthetase [EC:6.1.1.5]	45.003	51.9773	315.788	283.453	131.322	145.997	404.702	379.13	265.288	1.47551	0.250185	1.30447e-09	1.13521e-08
Methanoperedens_00722	hypothetical protein	0		793.9	S-layer domain-containing protein					8.46452	10.3403	81.3933	63.6767	9.55072	11.2305	40.3335	32.9324	23.5118	1.47024	0.732759	0.0149897	0.0373689
Methanoperedens_00378	D-inositol-3-phosphate glycosyltransferase	0	Spore coat protein SA	811.6	Glycosyltransferase	K19002	246.4	1.3e-73	1,2-diacylglycerol 3-alpha-glucosyltransferase [EC:2.4.1.337]	0	4.98595	27.2731	27.6715	0	5.61525	14.0142	14.8399	8.61734	1.46851	1.35468	0.0520969	0.105797
Methanoperedens_02065	hypothetical protein	0	Trk system potassium uptake protein TrkH	899	Potassium uptake protein, TrkH family	K03498	396	4.3e-119	trk system potassium uptake protein	14.3791	0	79.0931	79.7925	19.1014	0	46.1443	44.1132	27.3397	1.46543	0.79284	0.0214201	0.0503054
Methanoperedens_03280	Diaminopimelate epimerase	0	Diaminopimelate epimerase	544.3	Diaminopimelate epimerase	K01778	311.7	1.2e-93	diaminopimelate epimerase [EC:5.1.1.7]	12.7281	7.77438	103.722	81.5656	9.55072	5.61525	34.1809	28.0536	19.3501	1.46424	0.794963	0.0223717	0.052064
Methanoperedens_02294	hypothetical protein	0		1154.8	CRISPR-associated helicase Cas3, subtype CYANO	K07012	117.4	1.2e-34	CRISPR-associated endonuclease/helicase Cas3 [EC:3.1.-.- 3.6.4.-]	2.75368	0	18.4006	26.8532	4.77536	0	14.0142	21.3451	10.0337	1.46048	1.16127	0.0595967	0.118318
Methanoperedens_00172	Type-1 restriction enzyme MjaXIP specificity protein	0	Uncharacterized protein MJ1531	796.2	Restriction endonuclease S subunit	K01154	122.8	3.5e-36	type I restriction enzyme, S subunit [EC:3.1.21.3]	14.8495	5.18292	93.3494	85.506	16.7138	5.61525	46.1443	42.2836	27.6892	1.45922	0.67418	0.0112773	0.029433
Methanoperedens_02534	Lon protease	0	Lon protease 2	464.2	Archaeal serine protease	K06870	142.7	3.9e-42	uncharacterized protein	19.4524	7.92107	115.19	124.657	14.3261	5.61525	37.2572	42.0803	24.8197	1.4572	0.704441	0.0140643	0.0354356
Methanoperedens_03217	hypothetical protein	0		486.5	Uncharacterized protein					0	0	24.7101	42.2431	0	0	7.178	12.8071	4.99627	1.45291	1.97366	0.0384405	0.0824307
Methanoperedens_01639	hypothetical protein	0		390.6	Uncharacterized protein					17.183	10.4954	149.826	112.507	9.55072	5.61525	36.5736	26.224	19.4909	1.45251	0.818254	0.0250779	0.0577016
Methanoperedens_01322	hypothetical protein	0		127.1	SigmaK-factor processing regulatory protein BofA	K06317	23.3	9.1e-06	inhibitor of the pro-sigma K processing machinery	21.2136	0	152.125	187.168	4.77536	0	15.0396	19.3122	9.7818	1.45192	1.13192	0.0598977	0.118832
Methanoperedens_01764	hypothetical protein	0		1210.7	Putative Ser protein kise	K07180	124.9	6.2e-37	serine protein kise	16.7367	17.038	112.292	112.176	28.6522	28.0763	84.4269	88.0231	57.2946	1.45192	0.462016	0.000649308	0.00243407
Methanoperedens_01100	Iron-sulfur flavoprotein	0	Iron-sulfur flavoprotein MJ0731	421	Multimeric flavodoxin WrbA	K16902	49.7	5.7e-14	FAD reductase [D(P)H] [EC:1.5.1.45]	0	0	33.8223	38.5471	0	0	8.54524	9.96105	4.62657	1.45054	1.91911	0.04046	0.0855965
Methanoperedens_01562	hypothetical protein	0		432.2	Methylase involved in ubiquinone/mequinone biosynthesis	K18534	55.6	1.1e-15	MPBQ/MSBQ methyltransferase [EC:2.1.1.295]	0	0	33.0246	36.8852	0	0	8.54524	9.96105	4.62657	1.45054	1.91911	0.04046	0.0855965
Methanoperedens_03187	Glucose-6-phosphate isomerase	0		500.4	Glucose-6-phosphate isomerase	K06859	217	5.2e-65	glucose-6-phosphate isomerase, archaeal [EC:5.3.1.9]	17.8247	8.70989	99.9342	137.733	11.9384	5.61525	29.3956	42.2836	22.3082	1.4495	0.781496	0.0213952	0.0503054
Methanoperedens_02435	hypothetical protein	0	Probable cobalt-precorrin-7 C(5)-methyltransferase	391.3	Precorrin-6y C5,15-methyltransferase (Decarboxylating), CbiE subunit	K03399	174.8	3.3e-52	cobalt-precorrin-7 (C5)-methyltransferase [EC:2.1.1.289]	8.59149	10.4954	88.2152	102.134	4.77536	5.61525	21.534	21.955	13.4699	1.44887	0.937263	0.0393211	0.0838122
Methanoperedens_01323	Uridylate kise	0	Uridylate kise	429.1	Uridylate kise	K09903	156.3	1.8e-46	uridylate kise [EC:2.7.4.22]	42.0028	18.6585	229.017	245.406	26.2645	11.2305	62.8929	69.7273	42.5288	1.44687	0.556817	0.00368955	0.0111117
Methanoperedens_00310	hypothetical protein	0		681.4	EVE domain-containing protein					5.1756	0	34.5843	49.5098	4.77536	0	14.0142	20.9385	9.93202	1.44641	1.15557	0.0610154	0.120376
Methanoperedens_00807	Circadian clock protein KaiB	0	KaiB-like protein 1	225.7	KaiB domain-containing protein	K08481	142.1	1.2e-42	circadian clock protein KaiB	22.6092	0	169.503	134.387	7.16304	0	23.5849	19.5155	12.5659	1.44216	1.00043	0.0475372	0.0979998
Methanoperedens_02263	hypothetical protein	0	Putative dimethyl sulfoxide reductase iron-sulfur subunit B	540.8	Fe-S-cluster-containing hydrogese subunit	K08358	286.4	3.8e-86	tetrathiote reductase subunit B	90.9318	45.9653	505.927	450.216	69.2427	33.6915	169.196	157.344	107.368	1.43727	0.401814	0.000148027	0.000652099
Methanoperedens_01893	N-(5'-phosphoribosyl)anthranilate isomerase	0	N-(5'-phosphoribosyl)anthranilate isomerase	414.5	N-(5'-phosphoribosyl)anthranilate isomerase	K01817	203.1	1.3e-60	phosphoribosylanthranilate isomerase [EC:5.3.1.24]	23.7553	19.3464	154.865	170.616	14.3261	11.2305	41.0171	47.1625	28.4341	1.43547	0.649051	0.00997768	0.0265044
Methanoperedens_02201	hypothetical protein	0		550.4	Uncharacterized protein					2.85432	0	39.0765	49.8372	2.38768	0	14.356	10.9775	6.93029	1.43515	1.34915	0.0656608	0.12724
Methanoperedens_01052	D(P)H-quinone oxidoreductase subunit 4L, chloroplastic	0	(+)/H(+) antiporter subunit C1	217.2	Multisubunit +/H+ antiporter, MnhC subunit	K05567	136.6	1.9e-40	multicomponent +:H+ antiporter subunit C	21.6592	35.2787	202.388	218.591	7.16304	11.2305	29.3956	33.1357	20.2312	1.43434	0.779295	0.0218687	0.0510801
Methanoperedens_00947	hypothetical protein	0		1049.3	Glutamate synthase family protein	K22083	110.2	1.9e-32	methylamine---glutamate N-methyltransferase subunit C [EC:2.1.1.21]	22.8671	27.9346	157.061	161.405	33.4275	39.3068	100.834	108.149	70.4292	1.43358	0.42551	0.000285932	0.00117224
Methanoperedens_02228	hypothetical protein	0		778.9	Putative flavin-nucleotide-binding protein	K07005	33.2	9.4e-09	uncharacterized protein	4.21151	5.14481	46.6747	45.3722	4.77536	5.61525	23.243	20.1254	13.4398	1.4335	0.942088	0.0411191	0.0869262
Methanoperedens_01215	hypothetical protein	0	Lactate racemase	810.1	nickel-dependent lactate racemase	K22373	501	7.8e-151	lactate racemase [EC:5.1.2.1]	14.7043	0	66.4173	92.4734	16.7138	0	33.1555	47.9757	24.4612	1.42887	0.862985	0.0310175	0.0690169
Methanoperedens_03355	hypothetical protein	0		923.3	FIST domain-containing protein					1.87998	4.59318	30.6399	30.3805	2.38768	5.61525	17.0905	17.6859	10.6948	1.42873	1.07737	0.0548295	0.110713
Methanoperedens_00693	hypothetical protein	0		155.6	Putative periplasmic or secreted lipoprotein	K07339	23.8	8e-06	mR interferase HicA [EC:3.1.-.-]	0	0	123.658	78.7562	0	0	11.6215	7.52161	4.78578	1.42823	1.92273	0.0404171	0.0855965
Methanoperedens_01720	3-dehydroquite synthase	0	3-dehydroquite synthase	736.9	3-dehydroquite synthase	K11646	490.7	4.9e-148	3-dehydroquite synthase II [EC:1.4.1.24]	9.09152	66.6376	260.786	305.238	9.55072	67.383	120.317	142.707	84.9895	1.42798	0.838564	0.0200598	0.0475436
Methanoperedens_01776	hypothetical protein	0	Putative nuclease YhcG	711.1	Uncharacterized protein					7.00393	5.70403	68.4901	50.3039	7.16304	5.61525	30.7629	22.1583	16.4248	1.42753	0.877412	0.0337149	0.073769
Methanoperedens_00553	hypothetical protein	0		145.6	Uncharacterized protein					52.8707	32.2936	353.292	387.914	9.55072	5.61525	28.0284	32.1193	18.8284	1.42296	0.787629	0.0251395	0.0577854
Methanoperedens_01659	tR (guanine(26)-N(2))-dimethyltransferase	0	tR (guanine(26)-N(2))-dimethyltransferase	770.4	tR (guanine(26)-N(2))-dimethyltransferase	K00555	366.6	5.3e-110	tR (guanine26-N2/guanine27-N2)-dimethyltransferase [EC:2.1.1.215 2.1.1.216]	4.49816	5.49498	42.5204	48.0426	4.77536	5.61525	19.8249	23.1747	13.3476	1.42196	0.942896	0.0424231	0.0892836
Methanoperedens_00608	hypothetical protein	0		396	Uncharacterized protein					20.1678	19.7097	147.255	148.347	11.9384	11.2305	38.2827	40.2508	25.4256	1.42168	0.675104	0.0129617	0.0330686
Methanoperedens_01968	hypothetical protein	0		219.2	Uncharacterized protein involved in the oxidation of intracellular sulfur	K07236	57.2	2.5e-16	tR 2-thiouridine synthesizing protein C	59.7669	36.5058	367.716	358.025	19.1014	11.2305	51.6132	52.448	33.5983	1.41879	0.592209	0.00652439	0.0182106
Methanoperedens_02606	hypothetical protein	0		776.9	Putative membrane protein	K07507	28.9	1.6e-07	putative Mg2+ transporter-C (MgtC) family protein	0	0	15.5223	19.1649	0	0	8.20343	10.1643	4.59194	1.41618	1.88973	0.0418971	0.088439
Methanoperedens_02027	Desampylase	0		257.7	Putative metal-dependent protease of the PAD1/JAB1 superfamily	K21140	107.8	1e-31	[CysO sulfur-carrier protein]-S-L-cysteine hydrolase [EC:3.13.1.6]	27.7145	0	169.384	189.185	9.55072	0	25.6357	25.0043	15.0477	1.40565	0.910836	0.041684	0.0880546
Methanoperedens_02721	Phosphoribosylformylglycimidine cyclo-ligase	0	Phosphoribosylformylglycimidine cyclo-ligase	666	Phosphoribosylformylglycimidine cyclo-ligase	K01933	390.7	1.7e-117	phosphoribosylformylglycimidine cyclo-ligase [EC:6.3.3.1]	12.9781	25.3666	122.68	118.122	11.9384	22.461	49.5624	49.8052	33.4418	1.40215	0.61939	0.00817007	0.0223085
Methanoperedens_01450	Transcription elongation factor Spt4	1	Transcription elongation factor Spt4	127.9	Transcription elongation factor Spt4	K03050	94.8	3.9e-28	D-directed R polymerase subunit E" [EC:2.7.7.6]	27.7145	33.8562	284.565	262.543	4.77536	5.61525	21.534	20.7352	13.165	1.40205	0.934598	0.0441314	0.0925356
Methanoperedens_03198	hypothetical protein	0	Uncharacterized protein MJ1287	1098.6	ATPase, type IV secretory pathway VirB11 component like protein	K07332	724.4	3.5e-218	archaeal flagellar protein FlaI	6.22572	3.80269	41.094	44.811	9.55072	5.61525	27.6866	31.5094	18.5905	1.39903	0.786608	0.0271637	0.0615032
Methanoperedens_01013	Pyridoxal 5'-phosphate synthase subunit PdxT	0	Pyridoxal 5'-phosphate synthase subunit PdxT	416.8	Pyridoxal 5'-phosphate synthase subunit PdxT	K08681	272	1.2e-81	pyridoxal 5'-phosphate synthase pdxT subunit [EC:4.3.3.6]	4.17063	0	59.8161	51.1292	2.38768	0	15.0396	10.1643	6.89791	1.39192	1.35149	0.0692914	0.132645
Methanoperedens_03021	hypothetical protein	0		225.3	Uncharacterized protein					149.108	156.13	939.666	920.581	50.1413	50.5373	138.775	142.097	95.3877	1.39101	0.362833	5.19401e-05	0.000248927
Methanoperedens_01355	Ion-translocating oxidoreductase complex subunit B	0		122.9	4Fe-4S protein	K11260	55.9	8.3e-16	4Fe-4S ferredoxin	54.3765	26.5707	350.947	331.29	11.9384	5.61525	33.8391	33.339	21.183	1.38977	0.73362	0.0219007	0.0510956
Methanoperedens_02818	hypothetical protein	0	Macrolide export ATP-binding/permease protein MacB	733.4	ABC-type transport system, involved in lipoprotein release, permease component	K02004	78.8	5.2e-23	putative ABC transport system permease protein	17.6236	16.1468	102.684	130.532	19.1014	16.8458	48.8788	64.8485	37.4186	1.38866	0.595086	0.0073501	0.0202646
Methanoperedens_02928	Iron-sulfur flavoprotein	0	Iron-sulfur flavoprotein	376.7	Multimeric flavodoxin WrbA	K03809	72.7	6.2e-21	D(P)H dehydrogese (quinone) [EC:1.6.5.2]	13.7831	22.4501	140.773	155.318	7.16304	11.2305	32.1301	28.6634	19.7968	1.38828	0.777642	0.0255038	0.0584918
Methanoperedens_01802	hypothetical protein	0	Dihydropteroate synthase	780.8	Dihydropteroate synthase	K00796	316.9	4.2e-95	dihydropteroate synthase [EC:2.5.1.15]	6.33279	20.6298	95.643	74.8912	7.16304	22.461	47.5115	38.8278	28.9908	1.38514	0.73699	0.0180596	0.0434195
Methanoperedens_02528	hypothetical protein	0		523.9	Cytochrome b subunit of formate dehydrogese	K00127	124.8	7.9e-37	formate dehydrogese subunit gamma	3.4229	0	62.4809	52.7711	2.38768	0	19.1413	8.53804	7.51676	1.38456	1.42807	0.0673612	0.129826
Methanoperedens_00089	hypothetical protein	0		160.2	Uncharacterized protein					65.3154	49.1014	361.934	404.095	31.0398	22.461	75.5399	88.0231	54.266	1.38395	0.483899	0.00174346	0.00577826
Methanoperedens_01328	hypothetical protein	0		632.1	Uncharacterized protein	K07101	45.8	8.9e-13	uncharacterized protein	2.78042	6.79315	51.6594	61.4583	2.38768	5.61525	19.4831	15.0432	10.6323	1.38274	1.0866	0.0599507	0.118854
Methanoperedens_02543	hypothetical protein	0		677.9	Uncharacterized protein					17.432	12.1686	114.455	102.689	16.7138	11.2305	48.1951	45.1297	30.3173	1.38254	0.616036	0.00980261	0.0261618
Methanoperedens_02377	Tetrahydromethanopterin S-methyltransferase subunit B	0	Tetrahydromethanopterin S-methyltransferase subunit B	196.4	Tetrahydromethanopterin S-methyltransferase subunit B	K00578	117.2	6.6e-35	tetrahydromethanopterin S-methyltransferase subunit B [EC:2.1.1.86]	123.916	0	573.56	615.323	35.8152	0	72.8054	81.518	47.5346	1.38004	0.856598	0.0324036	0.0714427
Methanoperedens_00526	Isopropylmalate/citramalate isomerase large subunit	0	Probable 3-isopropylmalate dehydratase large subunit	859.8	3-isopropylmalate dehydratase large subunit	K01703	611.9	2.5e-184	3-isopropylmalate/(R)-2-methylmalate dehydratase large subunit [EC:4.2.1.33 4.2.1.35]	48.746	24.8119	257.538	240.698	57.3043	28.0763	132.964	129.697	87.0103	1.37772	0.416693	0.000419609	0.00165108
Methanoperedens_02983	hypothetical protein	0	Uncharacterized MscS family protein AF_1546	474.6	Small-conductance mechanosensitive channel	K03442	293.4	5.5e-88	small conductance mechanosensitive channel	6.27116	15.3218	79.7218	73.9682	4.77536	11.2305	26.6611	25.8174	17.1211	1.37738	0.850748	0.0342223	0.0746263
Methanoperedens_02819	putative ABC transporter ATP-binding protein	0	Uncharacterized ABC transporter ATP-binding protein MJ1508	413.7	ABC-type antimicrobial peptide transport system, ATPase component	K02003	336.6	3.7e-101	putative ABC transport system ATP-binding protein	3.95921	0	40.0069	50.0082	2.38768	0	10.5961	13.8235	6.70182	1.37475	1.3318	0.0715112	0.136434
Methanoperedens_02434	Cobalt-precorrin-5B C(1)-methyltransferase	0	Cobalt-precorrin-5B C(1)-methyltransferase	652.5	Cobalt-precorrin-5B C(1)-methyltransferase	K02188	220.4	9.8e-66	cobalt-precorrin-5B (C1)-methyltransferase [EC:2.1.1.195]	12.9001	12.6071	100.077	89.6168	11.9384	11.2305	40.6753	35.7785	24.9057	1.37313	0.680751	0.0164318	0.0401524
Methanoperedens_02973	hypothetical protein	0	Uncharacterized protein MJ1214	1976.4	Type I restriction enzyme R protein	K01153	561.9	8.8e-169	type I restriction enzyme, R subunit [EC:3.1.21.3]	16.3238	12.5945	96.8967	88.4101	45.3659	33.6915	118.266	112.621	77.4861	1.37261	0.401618	0.000274922	0.00112873
Methanoperedens_00576	hypothetical protein	0		398.3	Uncharacterized protein	K13280	97.6	1.5e-28	sigl peptidase I [EC:3.4.21.89]	0	0	36.5892	35.2851	0	0	8.88705	8.94462	4.45792	1.37177	1.83817	0.0444467	0.0928625
Methanoperedens_00076	hypothetical protein	0		370.9	Uncharacterized protein (Fragment)	K07725	29.8	7.2e-08	CRISPR-associated protein Csa3	0	0	30.0986	35.7948	0	0	8.20343	9.75776	4.4903	1.37033	1.84189	0.0442934	0.0927511
Methanoperedens_01539	tR-splicing endonuclease	0	tR-splicing endonuclease	697.6	tR-splicing endonuclease	K01170	167.2	7.2e-50	tR-intron endonuclease, archaea type [EC:4.6.1.16]	0	0	20.2097	21.799	0	0	9.57067	8.33476	4.47636	1.36904	1.838	0.0444509	0.0928625
Methanoperedens_02387	30S ribosomal protein S8e	0	30S ribosomal protein S8e	250	30S ribosomal protein S8e	K02995	69.6	4.8e-20	small subunit ribosomal protein S8e	339.664	325.439	1890.87	2041.2	121.772	112.305	297.716	334.407	216.55	1.36852	0.272791	2.25175e-07	1.5193e-06
Methanoperedens_00450	hypothetical protein	0		679.9	Mg2+/Co2+ transporter	K03284	84.6	1.5e-24	magnesium transporter	13.8572	0	85.0684	94.3782	14.3261	0	38.6245	29.4766	20.6068	1.36687	0.856739	0.0378031	0.0811865
Methanoperedens_03176	hypothetical protein	0		1447.2	Fe-S oxidoreductase	K04034	284.7	3.7e-85	aerobic magnesium-protoporphyrin IX monomethyl ester cyclase [EC:1.21.98.3]	8.36445	2.91945	42.8447	49.9397	16.7138	5.61525	37.599	45.7395	26.4169	1.36302	0.689975	0.0186227	0.0444344
Methanoperedens_01485	hypothetical protein	0		542.7	Putative phosphoesterase, ICC	K06953	165.3	4.4e-49	uncharacterized protein	13.167	16.0849	99.7873	107.613	9.55072	11.2305	31.7883	35.7785	22.087	1.3615	0.722186	0.0218158	0.0510654
Methanoperedens_00219	Inosine/xanthosine triphosphatase	0	Probable inosine/xanthosine triphosphatase	379.8	NTPase_I-T domain-containing protein	K01529	139.8	2.1e-41	inosine/xanthosine triphosphatase [EC:3.6.1.73]	0	11.5334	56.9329	65.763	0	5.61525	12.647	14.8399	8.27553	1.3597	1.32773	0.0605192	0.119647
Methanoperedens_00965	hypothetical protein	0		1088.6	Uncharacterized protein					111.343	88.2277	643.964	550.582	176.688	134.766	448.796	400.475	290.181	1.35826	0.262721	1.0769e-07	7.59991e-07
Methanoperedens_02511	50S ribosomal protein L5	0	50S ribosomal protein L5	334.3	50S ribosomal protein L5	K02931	123.7	1.6e-36	large subunit ribosomal protein L5	35.586	37.2618	278.391	210.577	16.7138	16.8458	57.424	45.3329	34.0791	1.35318	0.60552	0.00971643	0.0260052
Methanoperedens_02472	hypothetical protein	0		593.2	Phosphate/phosphite/phosphote ABC transporter, periplasmic binding protein	K02044	218.9	3e-65	phosphote transport system substrate-binding protein	5.63376	27.529	106.51	101.506	4.77536	22.461	39.6499	39.031	26.4793	1.35024	0.803933	0.0265082	0.0604531
Methanoperedens_01591	D-inositol-3-phosphate glycosyltransferase	0		775.8	Glycosyltransferase	K13001	181.6	4.1e-54	mannosyltransferase [EC:2.4.1.-]	4.49816	0	30.0575	37.5985	4.77536	0	14.0142	18.2958	9.27134	1.34685	1.11904	0.0722867	0.137821
Methanoperedens_00090	hypothetical protein	0		165.6	Uncharacterized protein					35.3075	0	237.849	212.051	7.16304	0	20.5086	19.7188	11.8476	1.34513	0.983679	0.0585555	0.116659
Methanoperedens_01542	Cyclic 2,3-diphosphoglycerate synthetase	0		878.6	Putative GTPase	K05716	49.4	6e-14	cyclic 2,3-diphosphoglycerate synthase [EC:6.5.1.9]	19.5706	19.126	128.223	117.78	23.8768	22.461	68.7037	65.8649	45.2266	1.34494	0.504639	0.00319613	0.00978147
Methanoperedens_00225	Modification methylase MwoI	0	Modification methylase MwoI	615.9	Modification methylase	K00571	172.4	3.9e-51	site-specific D-methyltransferase (adenine-specific) [EC:2.1.1.72]	8.76683	0	51.4374	58.623	7.16304	0	18.4577	21.955	11.8939	1.34364	0.992701	0.0593166	0.117926
Methanoperedens_01061	hypothetical protein	0	30S ribosomal protein S13	333.2	30S ribosomal protein S13	K02964	129.8	1.7e-38	small subunit ribosomal protein S18e	153.153	164.276	1043.48	802.782	97.8949	101.075	292.931	235.203	181.776	1.34338	0.31712	9.16433e-06	4.90551e-05
Methanoperedens_02653	Sensor histidine kise RcsC	0	Methyl sulfide methyltransferase-associated sensor	1298.9	Sigl transduction histidine kise	K07652	298.6	2.6e-89	two-component system, OmpR family, sensor histidine kise VicK [EC:2.7.13.3]	18.8686	9.21999	102.917	94.1621	35.8152	16.8458	85.7942	79.4851	54.4851	1.34145	0.491124	0.00275698	0.00862354
Methanoperedens_01669	7,8-dihydro-6-hydroxymethylpterin dimethyltransferase	0	7,8-dihydro-6-hydroxymethylpterin dimethyltransferase	1029.6	Putative Fe-S oxidoreductase	K06937	599.6	1.2e-180	7,8-dihydro-6-hydroxymethylpterin dimethyltransferase [EC:2.1.1.-]	18.826	45.9958	186.885	175.162	26.2645	61.7678	114.506	112.011	78.6374	1.33931	0.493967	0.00218983	0.00705168
Methanoperedens_01047	hypothetical protein	0		166.8	Multisubunit +/H+ antiporter, MnhF subunit	K05570	88.9	7.4e-26	multicomponent +:H+ antiporter subunit F	9.76306	0	98.6534	119.689	2.38768	0	10.5961	13.2136	6.54935	1.33914	1.316	0.0753477	0.142508
Methanoperedens_00516	Malate dehydrogese	0	Malate dehydrogese	596.7	Malate dehydrogese	K00024	421.2	1e-126	malate dehydrogese [EC:1.1.1.37]	36.0288	6.77124	168.029	171.94	31.0398	5.61525	63.5766	67.8978	42.0324	1.33774	0.628995	0.0133997	0.0339115
Methanoperedens_01777	hypothetical protein	0		312	Uncharacterized protein					0	0	39.2424	51.8397	0	0	7.51981	10.5709	4.52268	1.33619	1.81988	0.0454923	0.0946214
Methanoperedens_02615	5-formaminoimidazole-4-carboxamide-1-(beta)-D-ribofuranosyl 5'-monophosphate synthetase	0	5-formaminoimidazole-4-carboxamide-1-(beta)-D-ribofuranosyl 5'-monophosphate synthetase	784.3	ATP-utilizing enzymes of ATP-grasp superfamily (Probably carboligase)	K06863	499.2	1.1e-150	5-formaminoimidazole-4-carboxamide-1-(beta)-D-ribofuranosyl 5'-monophosphate synthetase [EC:6.3.4.23]	24.5471	32.713	183.304	163.315	26.2645	33.6915	86.136	76.4358	55.6319	1.33484	0.474182	0.00193827	0.00633512
Methanoperedens_00308	hypothetical protein	0		964.1	Uncharacterized protein					21.5236	8.76444	116.346	103.28	28.6522	11.2305	68.0201	63.0189	42.7304	1.33375	0.549778	0.00652807	0.0182106
Methanoperedens_00751	hypothetical protein	0	Putative phosphoenolpyruvate synthase	1655.2	Phosphoenolpyruvate synthase/pyruvate phosphate dikise	K22579	703.2	1.1e-211	rifampicin phosphotransferase [EC:2.7.9.6]	1.03387	7.57792	35.0482	42.4408	2.38768	16.8458	35.5482	26.0207	20.2006	1.33317	0.957075	0.0421279	0.0887942
Methanoperedens_03125	hypothetical protein	0		338.2	Uncharacterized protein					34.7633	36.4003	237.96	224.157	16.7138	16.8458	50.246	49.3987	33.301	1.33149	0.58087	0.00887363	0.0239985
Methanoperedens_02505	50S ribosomal protein L29	0	50S ribosomal protein L29	122.5	50S ribosomal protein L29	K02904	54.8	2.1e-15	large subunit ribosomal protein L29	39.0522	0	326.723	188.6	7.16304	0	26.3193	15.8564	12.3347	1.3303	1.04824	0.0637517	0.124305
Methanoperedens_02715	hypothetical protein	0	Probable anion ABC transporter permease protein HVO_1887	394	ABC-type tungstate transport system, periplasmic component	K05773	256.6	3.3e-77	tungstate transport system permease protein	7.01346	25.7031	108.59	115.943	4.77536	16.8458	32.4719	30.493	21.1465	1.32453	0.811369	0.0324099	0.0714427
Methanoperedens_01497	hypothetical protein	0		738.4	Uncharacterized protein					2.23737	0	25.5252	23.2728	2.38768	0	11.9633	11.3841	6.43377	1.32177	1.30098	0.0775325	0.145476
Methanoperedens_00369	hypothetical protein	0		782.7	Uncharacterized protein					21.4787	20.9908	129.522	135.248	23.8768	22.461	63.2348	68.9142	44.6217	1.31771	0.508393	0.00402899	0.0120572
Methanoperedens_00195	PqqA peptide cyclase	0	AdoMet-dependent heme synthase	741.5	Putative heme d1 biosynthesis radical SAM protein NirJ2	K22227	514.1	4.6e-155	AdoMet-dependent heme synthase [EC:1.3.98.6]	106.486	94.6066	590.074	571.359	105.058	89.8441	255.673	258.377	177.238	1.31572	0.278936	1.11941e-06	6.82517e-06
Methanoperedens_00825	hypothetical protein	0	RsbT co-antagonist protein RsbRA	566.6	Anti-anti-sigma regulatory factor (Antagonist of anti-sigma factor)	K17763	217.6	7.2e-65	rsbT co-antagonist protein RsbR	292.054	270.179	1524.09	1643.25	245.931	218.995	563.644	634.458	415.757	1.31449	0.224807	2.28188e-09	1.92669e-08
Methanoperedens_01870	hypothetical protein	0	Uncharacterized methyltransferase PH0819	1005	Fe-S oxidoreductase	K04034	373.1	6.6e-112	aerobic magnesium-protoporphyrin IX monomethyl ester cyclase [EC:1.21.98.3]	13.7464	4.19817	75.0529	67.664	19.1014	5.61525	45.8025	42.4869	28.2515	1.31228	0.656631	0.0187937	0.0447672
Methanoperedens_02535	Glutamyl-tR(Gln) amidotransferase subunit D	0	Glutamyl-tR(Gln) amidotransferase subunit D	812	Glutamyl-tR(Gln) amidotransferase subunit D	K09482	617.9	1.4e-186	glutamyl-tR(Gln) amidotransferase subunit D [EC:6.3.5.7]	55.8964	80.9285	363.725	383.004	64.4673	89.8441	184.235	201.66	135.052	1.30919	0.335501	3.71126e-05	0.000182476
Methanoperedens_02557	hypothetical protein	0		315.8	Uncharacterized protein					66.5148	203.137	834.725	702.174	28.6522	84.2288	157.916	138.438	102.309	1.30303	0.553406	0.00588627	0.0167161
Methanoperedens_01946	Translation initiation factor 1A	0	Translation initiation factor 1A 1	214.2	Translation initiation factor 1A	K03236	122.5	5.6e-36	translation initiation factor 1A	16.3647	0	104.018	136.787	4.77536	0	13.3306	18.2958	9.10043	1.30282	1.11806	0.078314	0.146555
Methanoperedens_03365	hypothetical protein	0	UPF0273 protein MK0039	786.9	Small GTP-binding protein domain	K06945	144.5	7.9e-43	uncharacterized protein	39.653	21.5291	191.725	205.824	42.9782	22.461	91.2631	102.253	64.7389	1.30177	0.456258	0.00197138	0.00643592
Methanoperedens_01606	putative flippase AglR	0	Probable flippase AglR	906.4	Membrane protein involved in the export of O-antigen and teichoic acid	K03328	171	8e-51	polysaccharide transporter, PST family	1.74979	8.55024	41.6365	47.778	2.38768	11.2305	24.9521	19.7188	14.5723	1.30122	0.976	0.0537253	0.10869
Methanoperedens_00194	hypothetical protein	0		506.9	Uncharacterized protein					65.2518	53.1413	366.308	346.777	42.9782	33.6915	105.619	104.693	71.7454	1.29055	0.405921	0.000679717	0.00253731
Methanoperedens_01526	5'-deoxyadenosine deamise	0	Putative aminohydrolase MTH_994	688.7	Cytosine deamise-like metal-dependent hydrolase	K12960	139.7	2.2e-41	5-methylthioadenosine/S-adenosylhomocysteine deamise [EC:3.5.4.31 3.5.4.28]	22.2194	12.0637	121.515	116.479	21.4891	11.2305	51.6132	51.6348	33.9919	1.28953	0.577485	0.0111131	0.0290847
Methanoperedens_02520	Protein translocase subunit SecY	0	Protein translocase subunit SecY	936.4	Protein translocase subunit SecY	K03076	296.4	8.3e-89	preprotein translocase subunit SecY	200.93	241.225	1143.91	1228.42	276.971	320.069	692.506	775.336	516.22	1.28631	0.215361	9.36317e-10	8.27517e-09
Methanoperedens_00559	hypothetical protein	8	Hydroxylamine oxidoreductase	907.1	MULTIHEME_CYTC domain-containing protein	K10535	359.7	3.8e-108	hydroxylamine dehydrogese [EC:1.7.2.6]	605.661	425.49	2910.23	2854.92	747.344	505.373	1577.11	1614.5	1111.08	1.28194	0.25289	1.71541e-07	1.16706e-06
Methanoperedens_00604	Bifunctiol F420 biosynthesis protein FbiB	0		373.2	Nitroreductase	K19286	112.5	3.3e-33	FMN reductase [D(P)H] [EC:1.5.1.39]	9.4412	0	83.0912	56.1178	4.77536	0	18.4577	13.0103	9.06085	1.28128	1.11748	0.0812522	0.150563
Methanoperedens_01689	hypothetical protein	0	Xanthan biosynthesis protein XanB	956.8	Mannose-1-phosphate guanylyltransferase	K16011	573.6	7.8e-173	mannose-1-phosphate guanylyltransferase / mannose-6-phosphate isomerase [EC:2.7.7.13 5.3.1.8]	158.555	238.737	1076.32	1029.08	205.34	297.608	612.181	610.673	431.451	1.2783	0.25931	2.96183e-07	1.96325e-06
Methanoperedens_00560	hypothetical protein	0	Transmembrane protein DDB_G0273707/DDB_G0273361	345.9	CBS-domain-containing membrane protein	K07168	198.7	2.8e-59	CBS domain-containing membrane protein	163.19	281.441	1198.42	1230.32	81.1811	134.766	261.826	260.41	184.546	1.27641	0.333529	4.7863e-05	0.000230148
Methanoperedens_01626	hypothetical protein	0		592.4	Uncharacterized protein					50.3639	28.9529	276.186	230.022	40.5905	22.461	97.7575	84.9738	61.4457	1.27449	0.463011	0.00271669	0.00851629
Methanoperedens_03392	hypothetical protein	0	UPF0216 protein MTH_949	276.9	Uncharacterized protein	K09737	126	1.8e-37	uncharacterized protein	54.4531	44.3468	351.046	284.331	21.4891	16.8458	60.8421	51.2283	37.6013	1.27404	0.556989	0.00951249	0.0255075
Methanoperedens_01998	Isopropylmalate/citramalate isomerase small subunit	0	3-isopropylmalate dehydratase small subunit	364	3-isopropylmalate dehydratase small subunit	K01704	176	2.3e-52	3-isopropylmalate/(R)-2-methylmalate dehydratase small subunit [EC:4.2.1.33 4.2.1.35]	43.9338	95.4129	440.758	329.144	21.4891	44.922	94.6812	73.7931	58.7214	1.27357	0.537175	0.00639584	0.0179654
Methanoperedens_02954	hypothetical protein	0	Probable acetolactate synthase small subunit	312	Acetolactate synthase, small subunit	K01653	267.2	6.1e-80	acetolactate synthase I/III small subunit [EC:2.2.1.6]	102.892	50.2774	506.435	499.778	47.7536	22.461	103.226	101.44	68.7203	1.27211	0.447351	0.00210558	0.00681909
Methanoperedens_01158	Sigl recognition particle receptor FtsY	0	Sigl recognition particle receptor FtsY	658.7	Sigl recognition particle receptor FtsY	K03110	337.2	3.2e-101	fused sigl recognition particle receptor	69.3261	36.2954	342.999	312.271	66.855	33.6915	145.269	138.235	96.0126	1.27115	0.400718	0.000729283	0.00267084
Methanoperedens_02716	hypothetical protein	0	Tungstate-binding protein TupA	566.6	ABC-type tungstate transport system, permease component	K05772	345	3.9e-104	tungstate transport system substrate-binding protein	17.837	29.0531	121.128	157.376	14.3261	22.461	42.7262	57.9367	34.3625	1.27017	0.625861	0.0161003	0.0394785
Methanoperedens_00309	hypothetical protein	0		125.2	Uncharacterized protein					0	0	123.956	102.03	0	0	9.22886	7.92818	4.28926	1.26901	1.73847	0.0502937	0.102649
Methanoperedens_02250	dITP/XTP pyrophosphatase	0	dITP/XTP pyrophosphatase	399.4	dITP/XTP pyrophosphatase	K02428	163.3	2.5e-48	XTP/dITP diphosphohydrolase [EC:3.6.1.66]	0	0	39.1777	34.7283	0	0	9.22886	7.92818	4.28926	1.26901	1.73847	0.0502937	0.102649
Methanoperedens_03124	S-methyl-5'-thioadenosine phosphorylase	0	S-methyl-5'-thioadenosine phosphorylase	573.9	S-methyl-5'-thioadenosine phosphorylase	K00772	390	2.4e-117	5'-methylthioadenosine phosphorylase [EC:2.4.2.28]	78.1044	132.11	558.138	541.808	62.0797	101.075	194.831	197.188	138.793	1.26713	0.34945	0.000110239	0.000501198
Methanoperedens_03085	Acetyl-CoA decarbonylase/synthase complex subunit beta 2	0	Acetyl-CoA decarbonylase/synthase complex subunit beta 2	907.5	Acetyl-CoA decarbonylase/synthase complex subunit beta	K00193	741.4	6.7e-224	acetyl-CoA decarbonylase/synthase, CODH/ACS complex subunit beta [EC:2.3.1.169]	74.6295	48.9193	341.161	384.086	97.8949	61.7678	196.54	230.934	146.784	1.26697	0.347672	0.000129729	0.000584283
Methanoperedens_03246	hypothetical protein	0		356.7	Cohesin domain	K10737	25	6.3e-07	D helicase MCM8 [EC:3.6.4.12]	59.3406	31.5178	287.617	279.873	54.9166	28.0763	116.899	118.719	79.6528	1.26657	0.417864	0.00117203	0.00409489
Methanoperedens_02624	Geranylfarnesyl diphosphate synthase	0	Geranylgeranyl diphosphate synthase	618.6	Geranylgeranyl pyrophosphate synthase	K13787	295.3	1.8e-88	geranylgeranyl diphosphate synthase, type I [EC:2.5.1.1 2.5.1.10 2.5.1.29]	88.3237	65.392	451.043	438.983	78.7934	56.1525	176.715	179.502	122.791	1.26171	0.329914	6.47968e-05	0.000306381
Methanoperedens_03169	hypothetical protein	0		382.9	Putative methanogenesis marker protein 17					29.9206	31.3296	186.699	192.137	16.7138	16.8458	45.8025	49.1954	32.1393	1.26026	0.583808	0.0131655	0.0334084
Methanoperedens_03391	hypothetical protein	0		237.3	RecG-like helicase	K06932	25.9	5.2e-07	tR(Ile2)-agmatinylcytidine synthase [EC:6.3.4.22]	13.6373	33.3188	153.36	155.785	4.77536	11.2305	23.5849	25.0043	16.1487	1.25706	0.845303	0.0485071	0.0995045
Methanoperedens_02460	hypothetical protein	0	Polyribonucleotide 5'-hydroxyl-kise PYRAB01840	830.5	Polynucleotide 5'-hydroxyl-kise	K06947	100.4	2.1e-29	polynucleotide 5'-hydroxyl-kise GRC3/NOL9 [EC:2.7.1.-]	34.5284	49.6237	217.815	232.775	40.5905	56.1525	112.455	125.631	83.7074	1.2567	0.399017	0.000686541	0.00255606
Methanoperedens_00656	O-phosphoserine--tR(Cys) ligase	0	O-phosphoserine--tR(Cys) ligase	1082.4	O-phosphoserine--tR(Cys) ligase	K07587	854.6	4.7e-258	O-phosphoseryl-tR synthetase [EC:6.1.1.27]	30.3417	23.4099	155.64	163.738	45.3659	33.6915	102.201	110.791	73.0124	1.25575	0.407162	0.000967038	0.00344227
Methanoperedens_00863	ATP-dependent zinc metalloprotease FtsH	0	Uncharacterized AAA family ATPase y4kL	832.8	AAA+ family ATPase	K13525	203.8	1e-60	transitiol endoplasmic reticulum ATPase	60.2207	53.9484	336.974	304.255	71.6304	61.7678	176.032	165.882	118.828	1.2543	0.326941	5.98392e-05	0.000283886
Methanoperedens_02038	Proteasome subunit beta	0	Proteasome subunit beta	409.8	Proteasome subunit beta	K03433	276.2	5.8e-83	proteasome beta subunit [EC:3.4.25.1]	154.728	49.7413	643.713	673.131	90.7318	28.0763	165.778	180.925	116.378	1.25313	0.50833	0.00598271	0.016973
Methanoperedens_01094	hypothetical protein	0		131.3	Uncharacterized protein					36.7158	0	179.518	190.956	11.9384	0	25.6357	28.4601	16.5086	1.25264	0.862489	0.0554398	0.111786
Methanoperedens_01682	Tyrosine recombise XerA	0	Tyrosine recombise XerA	538.1	Site-specific recombise XerD	K04763	253.8	7.6e-76	integrase/recombise XerD	3.10162	15.1558	59.6493	64.5253	2.38768	11.2305	20.1668	22.3615	14.0366	1.25005	0.958739	0.0602861	0.119352
Methanoperedens_03444	Thiamine thiazole synthase	0	Thiamine thiazole synthase	601.3	Thiamine thiazole synthase	K22699	308.2	8.3e-93	sulfide-dependent adenosine diphosphate thiazole synthase [EC:2.4.2.59]	147.445	284.034	1147	1122.89	124.159	230.225	424.186	433.814	303.096	1.24741	0.354848	0.000165226	0.000713465
Methanoperedens_02180	Histidinol dehydrogese	0	Histidinol dehydrogese	808.9	Histidinol dehydrogese	K00013	598.7	2.9e-180	histidinol dehydrogese [EC:1.1.1.23]	46.9369	34.9016	251.445	225.542	54.9166	39.3068	129.204	120.956	86.0957	1.24248	0.380115	0.000525863	0.002027
Methanoperedens_03127	Aromatic-amino-acid aminotransferase 2	0	Probable aspartate aminotransferase	702.6	Aminotransferase	K00812	448.2	9.9e-135	aspartate aminotransferase [EC:2.6.1.1]	31.8203	53.8226	227.39	222.328	31.0398	50.5373	97.4157	99.2039	69.5492	1.23888	0.435064	0.00182019	0.0060045
Methanoperedens_02630	Phosphoglucosamine mutase	0	Probable phosphoglucosamine mutase	857.1	Phosphoglucosamine mutase	K03431	431.8	9.6e-130	phosphoglucosamine mutase [EC:5.4.2.10]	33.8091	34.0129	193.181	186.552	40.5905	39.3068	101.859	102.66	71.1041	1.23757	0.401577	0.00096191	0.00342951
Methanoperedens_01042	hypothetical protein	0		399.4	Beta-propeller domain-containing protein, methanol dehydrogese	K06872	203.1	1.1e-60	uncharacterized protein	0	8.36288	40.1663	41.3268	0	5.61525	12.3051	13.2136	7.78351	1.23748	1.2802	0.0726924	0.138501
Methanoperedens_00808	Circadian clock protein KaiB	0	KaiB-like protein 1	203.8	KaiB domain-containing protein	K08481	148.8	1e-44	circadian clock protein KaiB	33.365	20.3794	193.043	221.56	9.55072	5.61525	24.2685	29.07	17.1261	1.2372	0.787053	0.0463179	0.0959853
Methanoperedens_01715	50S ribosomal protein L18e	0	50S ribosomal protein L18e	240	50S ribosomal protein L18e	K02883	86.6	3.2e-25	large subunit ribosomal protein L18e	113.606	86.739	594.813	590.86	38.2029	28.0763	87.845	90.8692	61.2483	1.23708	0.433431	0.00205802	0.00668031
Methanoperedens_00067	hypothetical protein	0		68.2	Uncharacterized protein					26.0348	0	165.483	207.944	4.77536	0	13.3306	16.6695	8.69386	1.23684	1.09432	0.0880004	0.160655
Methanoperedens_01954	ATP-dependent dethiobiotin synthetase BioD	0	ATP-dependent dethiobiotin synthetase BioD	458.4	ATP-dependent dethiobiotin synthetase BioD	K01935	235.5	2.1e-70	dethiobiotin synthetase [EC:6.3.3.3]	0	8.93227	45.2844	41.4242	0	5.61525	12.9888	12.4005	7.75113	1.22977	1.2765	0.0735882	0.139645
Methanoperedens_03535	Glutamyl-tR(Gln) amidotransferase subunit C, chloroplastic/mitochondrial	0	Aspartyl/glutamyl-tR(Asn/Gln) amidotransferase subunit C	196.1	Aspartyl/glutamyl-tR(Asn/Gln) amidotransferase subunit C	K02435	110.6	1.9e-32	aspartyl-tR(Asn)/glutamyl-tR(Gln) amidotransferase subunit C [EC:6.3.5.6 6.3.5.7]	8.85721	0	106.823	78.9699	2.38768	0	12.647	9.75776	6.1981	1.22743	1.2781	0.0884525	0.161376
Methanoperedens_00143	hypothetical protein	0		375.6	Uncharacterized protein					27.131	44.1912	185.716	220.899	14.3261	22.461	43.068	53.4644	33.3299	1.22704	0.607951	0.0175998	0.0425304
Methanoperedens_02400	K(+)-stimulated pyrophosphate-energized sodium pump	0	K(+)-insensitive pyrophosphate-energized proton pump	1121.3	K(+)-insensitive pyrophosphate-energized proton pump	K15987	948.6	4.5e-286	K(+)-stimulated pyrophosphate-energized sodium pump	65.411	98.3465	409.617	422.678	124.159	179.688	341.468	367.949	253.316	1.22405	0.284935	7.00339e-06	3.79172e-05
Methanoperedens_02821	hypothetical protein	0		144.1	Uncharacterized protein					35.3075	28.7546	257.031	260.145	7.16304	5.61525	22.9012	21.955	14.4086	1.21723	0.835093	0.0573138	0.114668
Methanoperedens_02122	hypothetical protein	0		646.4	Uncharacterized protein	K13276	27.1	1.4e-07	bacillopeptidase F [EC:3.4.21.-]	12.1349	17.7888	80.6919	96.9231	11.9384	16.8458	34.8646	43.9099	26.8897	1.21538	0.659781	0.0266012	0.0606165
Methanoperedens_02985	ATP-dependent Clp protease proteolytic subunit	0	ATP-dependent Clp protease proteolytic subunit 1	387.9	Endopeptidase Clp	K01358	295.3	1.3e-88	ATP-dependent Clp protease, protease subunit [EC:3.4.21.92]	12.7596	0	72.0916	74.2623	7.16304	0	17.7741	19.109	11.0115	1.21021	0.972132	0.0792008	0.147824
Methanoperedens_00319	hypothetical protein	0	Ribonuclease P protein component 2	249.2	Ribonuclease P protein component 2	K03537	89.3	5.2e-26	ribonuclease P/MRP protein subunit POP5 [EC:3.1.26.5]	0	0	60.6075	41.6826	0	0	9.91247	7.11503	4.25688	1.20849	1.68588	0.0537509	0.10869
Methanoperedens_02987	hypothetical protein	0		594.7	Universal stress protein UspA-like protein	K14055	105.7	5e-31	universal stress protein E	16.3647	6.66376	76.4576	95.751	14.3261	5.61525	29.3956	38.4212	21.9395	1.20701	0.72504	0.0403166	0.0854845
Methanoperedens_00396	hypothetical protein	0		431.4	Sigl peptidase I	K13280	99.2	4.8e-29	sigl peptidase I [EC:3.4.21.89]	30.0139	45.8315	244.584	179.098	19.1014	28.0763	68.3619	52.0414	41.8952	1.20546	0.560916	0.0131011	0.0333046
Methanoperedens_00384	hypothetical protein	0		471.1	Uncharacterized protein					6.02207	9.8088	51.6912	51.0821	7.16304	11.2305	27.0029	26.6306	18.0068	1.20541	0.76724	0.0460813	0.0956347
Methanoperedens_01640	hypothetical protein	1		641.3	Methyltransferase family protein	K16868	37.2	3.4e-10	tellurite methyltransferase [EC:2.1.1.265]	21.9591	33.5317	155.682	145.309	19.1014	28.0763	59.4748	57.9367	41.1473	1.20439	0.526933	0.00969184	0.0259639
Methanoperedens_00818	Circadian clock protein KaiB	0	KaiB-like protein 1	219.5	KaiB domain-containing protein	K08481	140.6	3.6e-42	circadian clock protein KaiB	23.0129	37.4836	197.534	185.233	7.16304	11.2305	27.0029	26.4273	17.9559	1.19958	0.767042	0.0469563	0.097066
Methanoperedens_01024	GPN-loop GTPase	0	GPN-loop GTPase 1	512.3	Small G protein, GTPase SAR1	K24104	167.5	9.5e-50	GPN-loop GTPase	13.2687	0	68.1199	86.2621	9.55072	0	21.534	22.7681	13.4632	1.19814	0.902531	0.0714405	0.136391
Methanoperedens_01763	hypothetical protein	0		756.1	Uncharacterized protein	K09786	188.2	5.1e-56	uncharacterized protein	6.85491	5.58267	49.9022	44.5649	7.16304	5.61525	22.9012	21.3451	14.2562	1.19561	0.834433	0.0609286	0.120288
Methanoperedens_03477	hypothetical protein	0		672.9	Putative exonuclease of the beta-lactamase fold involved in R processing	K07577	161.8	5.1e-48	putative mR 3-end processing factor	75.7305	70.1821	400.069	382.713	69.2427	61.7678	160.65	159.783	112.861	1.19416	0.326786	0.000129749	0.000584283
Methanoperedens_02645	hypothetical protein	0		171	Uncharacterized protein (Fragment)					9.9901	0	84.6658	124.328	2.38768	0	8.88705	13.4169	6.17291	1.19155	1.28022	0.092562	0.167687
Methanoperedens_02733	hypothetical protein	0	Thiol:disulfide interchange protein DsbA	428.3	Protein-disulfide isomerase	K03673	123.3	3e-36	protein dithiol oxidoreductase (disulfide-forming) [EC:1.8.4.15]	70.9389	67.4018	391.811	363.824	42.9782	39.3068	104.252	101.033	71.8926	1.19098	0.396973	0.00132333	0.00457283
Methanoperedens_03466	putative protein	0	Uncharacterized protein AF_1724	639.8	ADP-ribosylglycohydrolase	K05521	229.8	1.3e-68	ADP-ribosyl-[dinitrogen reductase] hydrolase [EC:3.2.2.24]	8.15648	6.64267	63.8085	49.4915	7.16304	5.61525	24.6103	19.9221	14.3277	1.18947	0.844745	0.0629859	0.123235
Methanoperedens_02227	hypothetical protein	0		294.7	Uncharacterized protein	K02638	24.3	4.8e-06	plastocyanin	42.4854	23.0668	201.573	225.348	21.4891	11.2305	44.777	51.8381	32.3337	1.18828	0.589187	0.0202253	0.0478558
Methanoperedens_03512	hypothetical protein	0	Carbon monoxide dehydrogese	1241.9	Carbon monoxide dehydrogese	K00198	800.9	1.3e-241	aerobic carbon-monoxide dehydrogese catalytic subunit [EC:1.2.7.4]	1278.08	1010.55	6383.89	5400.94	2294.56	1746.34	5033.49	4444.25	3379.66	1.18637	0.21854	2.41899e-08	1.82518e-07
Methanoperedens_02622	Ribonuclease J	0	Ribonuclease J	898.3	Ribonuclease J	K12574	393.5	3.8e-118	ribonuclease J [EC:3.1.-.-]	107.875	108.249	565.748	544.593	133.71	129.151	307.97	309.402	220.058	1.18333	0.249003	1.01609e-06	6.23952e-06
Methanoperedens_02513	50S ribosomal protein L6	0	50S ribosomal protein L6	355.1	50S ribosomal protein L6	K02933	135.7	3.9e-40	large subunit ribosomal protein L6	38.8316	23.7185	196.192	205.567	19.1014	11.2305	42.3844	46.3494	29.7664	1.1832	0.59869	0.0222758	0.0518855
Methanoperedens_00921	Fumarate reductase (CoM/CoB) subunit A	0	Succite dehydrogese flavoprotein subunit	1151.3	Succite dehydrogese (quinone)	K00239	799.1	5.1e-241	succite dehydrogese / fumarate reductase, flavoprotein subunit [EC:1.3.5.1 1.3.5.4]	5.95597	0	31.0625	30.1469	9.55072	0	21.8758	21.955	13.3454	1.18286	0.900313	0.0741221	0.140564
Methanoperedens_01635	hypothetical protein	0		173.3	Uncharacterized protein					9.04367	22.0956	114.967	139.427	2.38768	5.61525	13.3306	16.8728	9.55157	1.18285	1.04854	0.0879134	0.160599
Methanoperedens_03484	hypothetical protein	0	Uncharacterized protein MJ0826	270	Membrane-bound serine protease (ClpP class)	K07340	81.2	1.6e-23	inner membrane protein	58.8458	115.018	420.072	464.545	23.8768	44.922	74.8563	86.3969	57.513	1.18277	0.495318	0.0070485	0.0195279
Methanoperedens_02282	hypothetical protein	0	Putative type-1 restriction enzyme HindVIIP specificity protein	941	Restriction endonuclease S subunit	K01154	123.9	1.6e-36	type I restriction enzyme, S subunit [EC:3.1.21.3]	3.69526	9.02832	46.9758	38.4377	4.77536	11.2305	26.6611	20.532	15.7997	1.17996	0.856897	0.0615849	0.120995
Methanoperedens_01629	hypothetical protein	0		486.5	tR(His) guanylyltransferase	K10761	171.5	5.1e-51	tR(His) guanylyltransferase [EC:2.7.7.79]	21.3012	0	96.0496	100.235	14.3261	0	28.3702	30.8996	18.399	1.17992	0.829285	0.0625005	0.122408
Methanoperedens_00416	Lipoate-protein ligase A subunit 1	0	Lipoate--protein ligase 2	552.7	Lipoate-protein ligase A	K03800	151.1	1.3e-44	lipoate---protein ligase [EC:6.3.1.20]	3.17029	0	32.035	41.2212	2.38768	0	10.5961	10.7742	5.93949	1.17984	1.24994	0.0956866	0.172255
Methanoperedens_02386	hypothetical protein	0	Probable protein adenylyltransferase aq_aa38	755	Fido domain-containing protein	K04095	23.6	6.7e-06	cell filamentation protein	0	0	21.9359	20.8335	0	0	10.2543	6.70846	4.24069	1.17743	1.66286	0.0561773	0.112792
Methanoperedens_03400	hypothetical protein	0		193.7	Uncharacterized protein					45.6994	44.6613	277.069	307.286	11.9384	11.2305	31.7883	34.762	22.4298	1.17414	0.675385	0.0360635	0.0781731
Methanoperedens_00841	Chromosome partition protein Smc	0		382.9	Putative coiled-coil protein	K03529	25	7.1e-07	chromosome segregation protein	53.3791	68.3134	322.304	296.507	50.1413	61.7678	132.964	127.664	93.1342	1.17311	0.361336	0.000551703	0.00211226
Methanoperedens_00882	hypothetical protein	0		304.7	Uncharacterized protein					0	0	40.5333	46.1956	0	0	7.51981	8.94462	4.11611	1.17223	1.63953	0.0565278	0.113255
Methanoperedens_01439	hypothetical protein	0	Rubrerythrin-2	378.3	Rubrerythrin	K19824	32.8	1.4e-08	rubrerythrin	0	0	35.1973	36.626	0	0	7.86162	8.53804	4.09991	1.17215	1.63598	0.0564854	0.11325
Methanoperedens_02450	hypothetical protein	0		779.2	Putative membrane protein (DUF2254)					4.10095	0	27.4033	28.5653	4.77536	0	14.0142	14.4334	8.30573	1.17157	1.07017	0.098965	0.176692
Methanoperedens_03277	hypothetical protein	0		636.3	NTP_transf_2 domain-containing protein	K09717	348	1e-104	uncharacterized protein	8.28761	6.74946	59.4315	67.2207	7.16304	5.61525	22.5594	20.9385	14.0691	1.1705	0.832695	0.0653003	0.126715
Methanoperedens_01601	hypothetical protein	0	UDP-glucose 4-epimerase	690.6	Putative nucleoside-diphosphate sugar epimerase	K15894	380.2	1.7e-114	UDP-N-acetylglucosamine 4,6-dehydratase/5-epimerase [EC:4.2.1.115 5.1.3.-]	16.9888	23.7185	106.798	117.66	16.7138	22.461	45.8025	53.0578	34.5088	1.16988	0.571136	0.0179943	0.0433418
Methanoperedens_01857	Chromosome partition protein Smc	0	D double-strand break repair Rad50 ATPase	1986.1	ATPase involved in D repair	K03546	150.8	1.2e-44	D repair protein SbcC/Rad50	45.9477	42.7657	244.151	212.69	150.424	134.766	351.038	319.16	238.847	1.16975	0.253842	2.11559e-06	1.22739e-05
Methanoperedens_02113	hypothetical protein	0	Uncharacterized protein MJ0808	716.8	Pyruvate-formate lyase-activating enzyme	K04069	262.9	8.6e-79	pyruvate formate lyase activating enzyme [EC:1.97.1.4]	10.1375	12.384	80.9579	62.1393	9.55072	11.2305	33.4973	26.6306	20.2273	1.16904	0.72962	0.0454545	0.0946214
Methanoperedens_02124	Phosphoadenosine phosphosulfate reductase	0	Uncharacterized protein MJ0066	1302.3	PAPS reductase/FAD synthetase family protein	K00390	173.5	1.4e-51	phosphoadenosine phosphosulfate reductase [EC:1.8.4.8 1.8.4.10]	13.6807	16.7124	80.7145	82.8419	23.8768	28.0763	61.8675	66.2715	45.023	1.16772	0.494106	0.00847084	0.022953
Methanoperedens_01483	hypothetical protein	1		142.5	DUF1858 domain-containing protein	K05601	23.7	2.6e-06	hydroxylamine reductase [EC:1.7.99.1]	48.4028	88.6937	382.601	391.095	9.55072	16.8458	33.1555	35.3719	23.731	1.16632	0.679833	0.0360693	0.0781731
Methanoperedens_00842	hypothetical protein	0		422.9	Uncharacterized protein	K22803	21.8	8.1e-06	structural maintence of chromosomes protein 5	136.683	47.7064	581.737	528.806	83.5688	28.0763	156.207	148.196	104.012	1.16594	0.484509	0.00782058	0.0214574
Methanoperedens_03409	2-isopropylmalate synthase	1	Putative homocitrate synthase AksA	757.7	Isopropylmalate/homocitrate/citramalate synthase	K10977	583.1	4.6e-176	methanogen homocitrate synthase [EC:2.3.3.14 2.3.3.-]	35.6124	27.1902	153.809	203.822	38.2029	28.0763	72.4636	100.22	59.7408	1.16274	0.489046	0.00826538	0.0225037
Methanoperedens_02982	Poly(3-hydroxyalkanoate) polymerase subunit PhaC	0	Poly(3-hydroxyalkanoate) polymerase subunit PhaC	733	PHB synthase subunit PhaC	K03821	363.4	6.1e-109	polyhydroxyalkanoate synthase subunit PhaC [EC:2.3.1.-]	28.4016	28.913	166.64	164.421	28.6522	28.0763	73.8308	67.8978	49.6143	1.16181	0.47002	0.00651343	0.0182055
Methanoperedens_01739	hypothetical protein	0	Prolycopene isomerase, chloroplastic	1030.8	Phytoene dehydrogese-like oxidoreductase	K09835	239.3	1.1e-71	prolycopene isomerase [EC:5.2.1.13]	8.62599	4.21503	46.6747	49.3496	11.9384	5.61525	28.3702	29.07	18.7485	1.15822	0.730067	0.0498398	0.101943
Methanoperedens_00715	Ribose 1,5-bisphosphate isomerase	0	Ribose 1,5-bisphosphate isomerase	600.5	Ribose 1,5-bisphosphate isomerase	K18237	381.6	5.2e-115	ribose 1,5-bisphosphate isomerase [EC:5.3.1.29]	5.47229	0	31.2156	42.1833	4.77536	0	11.9633	16.8728	8.40287	1.15609	1.09008	0.101728	0.180715
Methanoperedens_00943	Rhomboid protease GlpG	0		468.4	Putative membrane protein	K07059	239.2	9.5e-72	uncharacterized protein	34.4914	45.9653	216.68	204.432	26.2645	33.6915	72.4636	70.5405	50.74	1.15511	0.468633	0.00645636	0.0180995
Methanoperedens_02807	hypothetical protein	0	Endoribonuclease EndoA	232.3	Growth inhibitor	K07171	89	8.8e-26	mR interferase MazF [EC:3.1.-.-]	36.7158	17.9409	203.454	192.32	11.9384	5.61525	29.0538	28.2569	18.7161	1.15429	0.729914	0.0504898	0.102754
Methanoperedens_00988	hypothetical protein	0		296.6	Uncharacterized protein					77.1031	53.8226	418.277	338.606	33.4275	22.461	79.6416	67.2879	50.7045	1.15217	0.482748	0.0084088	0.0228285
Methanoperedens_03066	hypothetical protein	0	Putative type I restriction enzyme MpnORFDP M protein	362.8	Site-specific D-methyltransferase (adenine-specific)	K03427	149.3	3.5e-44	type I restriction enzyme M protein [EC:2.1.1.72]	0	0	31.962	38.1616	0	0	7.178	8.94462	4.03065	1.14834	1.62456	0.0603625	0.11942
Methanoperedens_01952	hypothetical protein	0	(S)-8-amino-7-oxononoate synthase BioU	658.3	Uncharacterized protein	K19064	37.1	3.7e-10	lysine 6-dehydrogese [EC:1.4.1.18]	53.5375	74.7448	325.753	306.858	50.1413	67.383	133.989	131.73	95.8109	1.14826	0.360996	0.000694931	0.00257715
Methanoperedens_02239	hypothetical protein	29		2843.1	IPT/TIG domain-containing protein	K10535	124	1.1e-36	hydroxylamine dehydrogese [EC:1.7.2.6]	256.791	286.768	1343.34	1301.14	1029.09	1106.2	2364.98	2389.23	1722.38	1.14803	0.142758	4.22197e-16	6.08007e-15
Methanoperedens_02295	tR(fMet)-specific endonuclease VapC	0		328.2	Ribonuclease VapC	K07064	74.8	2.4e-21	uncharacterized protein	10.5417	0	51.5426	97.9049	4.77536	0	10.2543	20.3287	8.83958	1.14685	1.14239	0.102362	0.181728
Methanoperedens_00583	3-phosphoshikimate 1-carboxyvinyltransferase	0	3-phosphoshikimate 1-carboxyvinyltransferase	813.5	3-phosphoshikimate 1-carboxyvinyltransferase	K00800	496.6	2.5e-149	3-phosphoshikimate 1-carboxyvinyltransferase [EC:2.5.1.19]	52.8082	39.699	231.718	268.616	62.0797	44.922	119.633	144.74	92.8438	1.14643	0.386808	0.00156584	0.00528844
Methanoperedens_02735	hypothetical protein	0		399.8	Uncharacterized protein					8.50642	10.3915	83.1827	61.6219	4.77536	5.61525	20.5086	15.8564	11.6889	1.14602	0.924072	0.0823272	0.152059
Methanoperedens_00044	hypothetical protein	0		515	Lysophospholipase	K06889	93.3	2.9e-27	uncharacterized protein	50.5382	74.0853	305.308	314.789	35.8152	50.5373	95.023	102.253	70.9072	1.14566	0.415145	0.00270755	0.00849704
Methanoperedens_01390	hypothetical protein	0		165.6	Putative redox protein, regulator of disulfide bond formation	K04085	53.6	3.5e-15	tR 2-thiouridine synthesizing protein A [EC:2.8.1.-]	42.4271	77.7438	297.335	386.156	9.55072	16.8458	29.3956	39.8442	23.9091	1.14551	0.708947	0.0433375	0.0910055
Methanoperedens_02847	Adaptive-response sensory-kise SasA	0	Sensor kise CckA	994.2	PAS domain S-box	K13587	385	1.1e-115	two-component system, cell cycle sensor histidine kise and response regulator CckA [EC:2.7.13.3]	16.5859	32.4183	124.886	121.999	23.8768	44.922	78.958	76.8424	56.1498	1.14302	0.484187	0.0079886	0.0218761
Methanoperedens_00627	hypothetical protein	0	Putative zinc metalloprotease MJ0611	398.3	Zn-dependent protease	K06402	41.8	1.7e-11	stage IV sporulation protein FB [EC:3.4.24.-]	16.2872	9.94826	118.125	136.895	9.55072	5.61525	30.421	20.7352	16.5806	1.13621	0.81148	0.0666484	0.128627
Methanoperedens_00014	Thiamine-monophosphate kise	0		763.8	Thiamine-monophosphate kise	K00946	196	2.1e-58	thiamine-monophosphate kise [EC:2.7.4.16]	0	5.6427	21.0789	35.1773	0	5.61525	9.57067	16.4662	7.91304	1.13223	1.27759	0.0810617	0.150309
Methanoperedens_01306	hypothetical protein	0		650.2	Uncharacterized protein					78.1044	17.3478	295.478	303.783	78.7934	16.8458	130.913	140.268	91.705	1.12933	0.599445	0.0270688	0.0613373
Methanoperedens_02103	hypothetical protein	0		909.1	HNHc domain-containing protein					1.90499	0	16.1447	20.1693	2.38768	0	9.22886	11.5873	5.80097	1.12518	1.23597	0.103617	0.183497
Methanoperedens_03318	F(420)H(2) dehydrogese subunit M	0	F(420)H(2) dehydrogese subunit M	951.8	Proton-translocating DH-quinone oxidoreductase, chain M	K22168	719.5	4.1e-217	F420H2 dehydrogese subunit M [EC:1.5.98.3]	71.454	45.7226	292.803	331.494	100.283	61.7678	180.475	213.248	138.943	1.12466	0.353123	0.000784363	0.00285474
Methanoperedens_03327	Elongation factor 1-beta	0	Elongation factor 1-beta	172.2	Elongation factor 1-beta	K03232	31.2	2.9e-08	elongation factor 1-beta	28.9601	23.5852	154.184	240.274	7.16304	5.61525	16.7487	27.2404	14.1918	1.12196	0.881346	0.0796638	0.148212
Methanoperedens_01334	Thiosulfate sulfurtransferase GlpE	0	Probable metallo-hydrolase YqgX	939.1	Rhodanese-related sulfurtransferase	K01069	154.7	7.9e-46	hydroxyacylglutathione hydrolase [EC:3.1.2.6]	13.1887	9.20651	82.909	65.0939	16.7138	11.2305	46.1443	33.5423	26.9077	1.11982	0.652334	0.0394009	0.0839192
Methanoperedens_00860	Replication factor C large subunit	0	Replication factor C large subunit	924.9	Replication factor C large subunit	K04800	594.5	2.8e-179	replication factor C large subunit	20.0225	13.3416	95.5249	104.812	26.2645	16.8458	55.0313	58.5466	39.172	1.11753	0.520175	0.0160567	0.0394396
Methanoperedens_01336	hypothetical protein	0		215.7	Cupin domain-containing protein	K21700	97.1	2e-28	beta-alanine degradation protein BauB	7.8821	0	89.9238	62.9555	2.38768	0	11.9633	8.94462	5.82391	1.11748	1.23615	0.104498	0.184367
Methanoperedens_01627	Homoisocitrate dehydrogese	0	3-isopropylmalate/3-methylmalate dehydrogese	654.8	Isopropylmalate/isohomocitrate dehydrogese	K10978	489.1	1.2e-147	methanogen homoisocitrate dehydrogese [EC:1.1.1.87 1.1.1.-]	44.5291	19.1989	195.522	183.912	40.5905	16.8458	78.2744	76.8424	53.1383	1.11729	0.49042	0.0118257	0.030632
Methanoperedens_00602	hypothetical protein	0		341.3	Uncharacterized protein					24.6882	0	99.7873	131.153	11.9384	0	21.1922	29.07	15.5501	1.1166	0.882803	0.0833923	0.153526
Methanoperedens_01826	hypothetical protein	0	GCR1-dependent translation factor 1	341.3	Putative membrane protein	K23541	154	9.2e-46	Ca2+/H+ antiporter, TMEM165/GDT1 family	0	0	31.4493	36.696	0	0	7.178	8.74133	3.97983	1.11605	1.58731	0.062168	0.122015
Methanoperedens_02660	hypothetical protein	0	D primase large subunit PriL	725.7	D primase large subunit PriL	K18882	356.2	4.8e-107	D primase large subunit	31.3734	11.7926	131.371	137.62	31.0398	11.2305	57.0822	62.409	40.4404	1.11465	0.551542	0.0218356	0.0510697
Methanoperedens_03531	R-binding protein	0	R-binding protein PAB1135	276.6	Putative exosome subunit	K07581	156.6	8.7e-47	R-binding protein	120.161	146.789	677.599	633.876	47.7536	56.1525	118.266	115.467	84.4098	1.11037	0.369363	0.00134096	0.0046281
Methanoperedens_02958	Outer membrane protein assembly factor BamB	0		333.6	WD40-like repeat	K17713	220.9	7.6e-66	outer membrane protein assembly factor BamB	133.557	165.589	721.888	692.399	159.975	190.919	379.75	380.146	277.697	1.10833	0.2362	1.33251e-06	7.92523e-06
Methanoperedens_00951	hypothetical protein	0		1087.4	Glutamate synthase family protein	K22083	103.9	1.6e-30	methylamine---glutamate N-methyltransferase subunit C [EC:2.1.1.21]	27.5576	23.7632	160.103	127.367	40.5905	33.6915	103.568	78.0621	63.9781	1.108	0.458614	0.00785674	0.0215358
Methanoperedens_02970	hypothetical protein	0		245	Uncharacterized protein					0	0	50.7174	45.2367	0	0	8.20343	7.52161	3.93126	1.10766	1.57608	0.0633358	0.123664
Methanoperedens_03224	ATP-dependent R helicase DbpA	0	Probable ATP-dependent helicase MJ1401	1601.6	D/R helicase, superfamily II	K03725	1008.8	3.8e-304	archaea-specific helicase [EC:3.6.4.-]	3.15091	5.13223	22.9379	26.7275	7.16304	11.2305	22.9012	27.647	17.2354	1.10714	0.772495	0.0642297	0.124979
Methanoperedens_00964	hypothetical protein	0		296.2	Uncharacterized protein					57.2766	69.9694	324.856	328.745	23.8768	28.0763	59.4748	62.8156	43.5609	1.10111	0.493649	0.0127552	0.0325924
Methanoperedens_01668	hypothetical protein	0	Uncharacterized protein MJ0674	719.5	Pyruvate formate lyase activating protein-like uncharacterized Fe-S protein	K04070	347	2.1e-104	putative pyruvate formate lyase activating enzyme [EC:1.97.1.4]	27.2353	30.2462	150.112	148.087	26.2645	28.0763	63.5766	65.255	45.7931	1.10083	0.478692	0.0108371	0.0284938
Methanoperedens_00216	hypothetical protein	0		444.1	Putative hydrolase of the alpha/beta superfamily	K07018	215.9	1.5e-64	uncharacterized protein	7.84611	38.3394	112.531	139.91	4.77536	22.461	30.0792	38.4212	23.9342	1.1005	0.810303	0.0624817	0.122408
Methanoperedens_01181	hypothetical protein	0		513.8	Putative integral membrane protein	K07706	31.8	1.5e-08	two-component system, LytTR family, sensor histidine kise AgrC [EC:2.7.13.3]	2.72746	0	31.1165	21.7846	2.38768	0	11.9633	8.74133	5.77308	1.09923	1.23011	0.1074	0.188234
Methanoperedens_00801	hypothetical protein	0		154.1	Uncharacterized protein					10.3512	0	114.719	84.5992	2.38768	0	11.6215	8.94462	5.73845	1.0992	1.22636	0.107738	0.188443
Methanoperedens_01167	hypothetical protein	5		630.2	MULTIHEME_CYTC domain-containing protein	K10535	62.8	4.2e-18	hydroxylamine dehydrogese [EC:1.7.2.6]	84.8204	100.275	410.262	485.87	74.0181	84.2288	157.232	194.139	127.405	1.09531	0.344252	0.000739061	0.00269848
Methanoperedens_02066	Diaminopimelate decarboxylase	0	Diaminopimelate decarboxylase	850.9	Diaminopimelate decarboxylase	K01586	538.7	4.3e-162	diaminopimelate decarboxylase [EC:4.1.1.20]	28.1688	19.6635	145.599	126.696	33.4275	22.461	75.8817	64.8485	49.1547	1.09193	0.481258	0.0121312	0.0313159
Methanoperedens_02542	ATP-dependent R helicase SrmB	0	Putative ATP-dependent R helicase MJ1505	1464.9	ERCC4-like helicase	K10848	132.8	2.1e-39	D excision repair protein ERCC-4 [EC:3.1.-.-]	86.8169	68.8676	402.432	368.805	183.851	140.381	374.281	357.988	264.125	1.09101	0.250545	7.76899e-06	4.19023e-05
Methanoperedens_03500	Archaeosine synthase	0	Archaeosine synthase subunit alpha	1219.1	tR-guanine transglycosylase	K07557	654.7	2.1e-197	archaeosine synthase alpha-subunit [EC:2.6.1.97 2.6.1.-]	44.1685	73.1024	266.116	282.119	74.0181	117.92	195.857	213.451	150.312	1.09089	0.340155	0.000625987	0.0023679
Methanoperedens_02455	Small archaeal modifier protein 3	0		132.9	MoaD family protein	K03636	57.2	4.3e-16	sulfur-carrier protein	0	0	78.6652	62.7581	0	0	8.54524	7.11503	3.91507	1.09005	1.56071	0.0648367	0.125988
Methanoperedens_00372	hypothetical protein	0		1061.6	Uncharacterized protein	K19670	63.3	3.2e-18	phosphonoacetate hydrolase [EC:3.11.1.2]	13.1419	4.01354	57.8302	57.9754	19.1014	5.61525	36.9154	38.6245	25.0641	1.08892	0.655971	0.0472505	0.0975616
Methanoperedens_03256	hypothetical protein	0	Uncharacterized KamA family protein MJ0634	1237.2	KamA family protein	K01843	352.2	8.7e-106	lysine 2,3-aminomutase [EC:5.4.3.2]	25.5615	13.8782	100.91	120.81	42.9782	22.461	74.5145	93.1053	58.2648	1.08883	0.48126	0.0124271	0.0319586
Methanoperedens_01164	Cytochrome b6-f complex iron-sulfur subunit	0		339.3	Ferredoxin subunit of nitrite reductase and ring-hydroxylating dioxygese	K16937	75.3	9e-22	thiosulfate dehydrogese (quinone) large subunit [EC:1.8.5.2]	83.3114	63.6086	339.452	451.674	38.2029	28.0763	68.3619	94.9349	57.394	1.08301	0.490057	0.0137894	0.0348047
Methanoperedens_01376	hypothetical protein	0		253.4	Putative transcriptiol regulator	K02565	27.9	2e-07	N-acetylglucosamine repressor	13.1168	0	83.3731	80.4016	4.77536	0	13.3306	13.4169	7.88071	1.08267	1.05007	0.116504	0.200681
Methanoperedens_02074	hypothetical protein	0	Sensor kise CckA	875.5	PAS domain S-box	K02491	155	6.1e-46	two-component system, sporulation sensor kise A [EC:2.7.13.3]	6.05888	11.8425	22.5145	18.682	4.77536	11.2305	20.1668	23.1747	14.8368	1.08163	0.835052	0.0794029	0.148104
Methanoperedens_02045	3-hydroxy-3-methylglutaryl-coenzyme A reductase	0	3-hydroxy-3-methylglutaryl-coenzyme A reductase	766.1	3-hydroxy-3-methylglutaryl coenzyme A reductase	K00021	593.2	1.4e-178	hydroxymethylglutaryl-CoA reductase (DPH) [EC:1.1.1.34]	4.26377	0	31.9658	25.7395	4.77536	0	15.7232	11.5873	8.02148	1.08101	1.06569	0.116479	0.200681
Methanoperedens_01009	hypothetical protein	0	Type I restriction enzyme EcoEI M protein	1059.7	Site-specific D-methyltransferase (adenine-specific)	K03427	341.2	3.2e-102	type I restriction enzyme M protein [EC:2.1.1.72]	13.3201	16.272	80.8667	75.7719	19.1014	22.461	50.9296	47.9757	35.1169	1.07891	0.541115	0.0229311	0.0532369
Methanoperedens_00833	hypothetical protein	0		278.5	Uncharacterized protein					0	0	35.2508	55.7989	0	0	6.15257	10.1643	4.07923	1.07503	1.56217	0.0640121	0.124641
Methanoperedens_00823	Phosphoglycerate kise	0	Phosphoglycerate kise 2	802.7	Phosphoglycerate kise	K00927	395.9	7.6e-119	phosphoglycerate kise [EC:2.7.2.3]	40.0094	20.5792	162.675	174.448	45.3659	22.461	81.0088	90.6659	59.8754	1.07382	0.459908	0.0106463	0.0280441
Methanoperedens_02463	hypothetical protein	0		187.2	Uncharacterized protein					71.5957	0	282.965	302.546	19.1014	0	32.8137	36.9982	22.2283	1.07187	0.802492	0.079722	0.148212
Methanoperedens_00806	Imidazoleglycerol-phosphate dehydratase	0	Imidazoleglycerol-phosphate dehydratase	380.2	Imidazoleglycerol-phosphate dehydratase	K01089	290.3	4e-87	imidazoleglycerol-phosphate dehydratase / histidinol-phosphatase [EC:4.2.1.19 3.1.3.15]	0	0	27.7131	38.2339	0	0	6.49438	9.35119	3.96139	1.07121	1.55018	0.0656609	0.12724
Methanoperedens_02623	hypothetical protein	0								52.8707	0	254.198	245.515	9.55072	0	20.1668	20.3287	12.5115	1.06848	0.890142	0.0984159	0.175933
Methanoperedens_00294	hypothetical protein	0		179.1	HicB-like domain-containing protein	K18843	69.5	7e-20	antitoxin HicB	19.0922	0	124.466	111.709	4.77536	0	13.6724	12.8071	7.8137	1.06672	1.04688	0.119961	0.205513
Methanoperedens_00539	Bifunctiol protein FolD protein	0	Bifunctiol protein FolD	582.8	Bifunctiol protein FolD	K01491	417.9	1.3e-125	methylenetetrahydrofolate dehydrogese (DP+) / methenyltetrahydrofolate cyclohydrolase [EC:1.5.1.5 3.5.4.9]	29.6258	36.1911	169.96	159.035	23.8768	28.0763	60.1585	58.7499	42.7153	1.06107	0.492477	0.0160467	0.0394396
Methanoperedens_01896	Ion-translocating oxidoreductase complex subunit B	0	Acetyl-CoA decarbonylase/synthase complex subunit gamma	319.3	CO dehydrogese/acetyl-CoA synthase gamma subunit (Corrinoid Fe-S protein)	K11260	154.5	3.5e-46	4Fe-4S ferredoxin	95.461	13.7195	375.228	343.16	40.5905	5.61525	70.0709	66.8813	45.7895	1.06023	0.660244	0.0518593	0.10539
Methanoperedens_03485	hypothetical protein	0	Uncharacterized protein MJ1154	787.3	HD superfamily phosphohydrolase	K06885	378.4	1.3e-113	uncharacterized protein	15.187	10.6014	84.8631	68.5087	16.7138	11.2305	41.0171	34.1522	25.7784	1.0582	0.627032	0.045493	0.0946214
Methanoperedens_00353	GTPase Obg	0	Uncharacterized GTP-binding protein MJ1326	708.4	Small GTP-binding protein domain	K06944	529.1	3.7e-159	uncharacterized protein	9.41533	5.75091	49.8716	52.9035	9.55072	5.61525	22.2176	24.5977	15.4953	1.05726	0.769752	0.0786746	0.147132
Methanoperedens_00577	hypothetical protein	0		733.8	Uncharacterized protein					0	4.93902	21.086	22.1541	0	5.61525	10.9379	11.7906	7.08595	1.05159	1.20389	0.0972543	0.174406
Methanoperedens_00997	hypothetical protein	0		453.8	Site-specific D methylase	K00558	35.3	8.5e-10	D (cytosine-5)-methyltransferase 1 [EC:2.1.1.37]	76.9992	39.6053	342.134	297.34	45.3659	22.461	88.5287	80.2983	59.1635	1.04902	0.45809	0.0122455	0.0315535
Methanoperedens_01950	3-methylornithine synthase	0	Biotin synthase	641	Biotin synthase	K01012	392	7.8e-118	biotin synthase [EC:2.8.1.6]	37.0095	51.6697	224.039	194.939	33.4275	44.922	88.8705	80.7048	61.9812	1.04801	0.430247	0.00766758	0.021058
Methanoperedens_01895	Anthranilate synthase component 2	0	Anthranilate synthase component 2	390.6	Anthranilate synthase, component II	K01658	265.4	9.1e-80	anthranilate synthase component II [EC:4.1.3.27]	8.99632	21.9799	85.0408	91.9076	4.77536	11.2305	19.8249	22.3615	14.5481	1.04541	0.829942	0.08746	0.159874
Methanoperedens_03137	hypothetical protein	0		282.3	Alkylhydroperoxidase AhpD family core domain					6.27116	0	59.2803	55.913	2.38768	0	9.91247	9.55448	5.46366	1.04517	1.19539	0.118333	0.203091
Methanoperedens_02320	hypothetical protein	0		1893.6	Uncharacterized protein					14.5773	4.45193	59.9891	53.8155	38.2029	11.2305	69.0455	64.6452	45.781	1.04429	0.55146	0.0309707	0.0689669
Methanoperedens_00395	hypothetical protein	0		946	Uncharacterized protein					77.2875	74.6536	350.939	366.912	102.67	95.4593	204.744	223.209	156.521	1.04386	0.286777	0.00015575	0.00067832
Methanoperedens_03167	hypothetical protein	0	Uncharacterized protein MJ0404	301.6	Putative methanogenesis marker protein 5					118.698	165.717	644.848	657.238	50.1413	67.383	119.633	127.257	91.1038	1.04131	0.365403	0.00229494	0.00735394
Methanoperedens_00350	hypothetical protein	0		411	Uncharacterized protein					4.23226	10.3403	68.9774	44.0234	2.38768	5.61525	17.0905	11.1808	9.06854	1.04021	1.03323	0.11502	0.198849
Methanoperedens_00226	hypothetical protein	0		511.1	RE_EcoO109I domain-containing protein					17.1145	0	85.9112	65.487	11.9384	0	26.3193	20.9385	14.7991	1.04013	0.86186	0.099787	0.178028
Methanoperedens_00705	hypothetical protein	0		876.7	Uncharacterized protein	K07459	86.8	2.5e-25	putative ATP-dependent endonuclease of the OLD family	13.6373	0	63.503	48.1288	16.7138	0	34.1809	27.0371	19.483	1.03097	0.821439	0.0938705	0.169841
Methanoperedens_00795	F420-non-reducing hydrogese vhc iron-sulfur subunit D	0	F420-non-reducing hydrogese vhc iron-sulfur subunit D	298.1	Coenzyme F420-reducing hydrogese, delta subunit	K14127	241.5	1.3e-72	F420-non-reducing hydrogese iron-sulfur subunit [EC:1.12.99.- 1.8.98.5 1.8.98.6]	82.9523	57.9057	353.44	388.507	33.4275	22.461	62.5511	71.5569	47.4991	1.029	0.478348	0.0173796	0.0420699
Methanoperedens_00100	hypothetical protein	0	Spore coat polysaccharide biosynthesis protein SpsK	605.9	dTDP-4-dehydrorhamnose reductase	K00067	328.2	1.8e-98	dTDP-4-dehydrorhamnose reductase [EC:1.1.1.133]	33.9138	41.4293	174.109	187.932	28.6522	33.6915	64.602	72.7766	49.9306	1.02757	0.464792	0.0143826	0.0360136
Methanoperedens_00478	D-phenylhydantoise	0	Protein FwdA	1150.6	Formylmethanofuran dehydrogese, subunit A	K00200	753	3.1e-227	formylmethanofuran dehydrogese subunit A [EC:1.2.7.12]	141.436	117.637	621.403	589.151	224.442	179.688	433.073	428.528	316.433	1.0237	0.228801	4.73892e-06	2.62073e-05
Methanoperedens_01597	hypothetical protein	0		183.7	Uncharacterized protein					0	0	65.3446	67.3803	0	0	7.178	7.7249	3.72572	1.02136	1.4934	0.0728348	0.138586
Methanoperedens_02026	hypothetical protein	0		146.4	Nucleotidyltransferase family protein					0	0	74.6795	85.112	0	0	6.83619	8.13147	3.74191	1.01926	1.49309	0.0727884	0.138586
Methanoperedens_01877	putative translation initiation factor IF-2	0	Probable translation initiation factor IF-2	1150.2	Probable translation initiation factor IF-2	K03243	784.3	6e-236	translation initiation factor 5B	17.4742	14.2311	71.1987	94.1281	28.6522	22.461	51.2714	70.5405	43.2313	1.01528	0.529805	0.0292991	0.0656568
Methanoperedens_02587	ATP-dependent D helicase Hel308	0	ATP-dependent D helicase Hel308	1445.6	ATP-dependent D helicase Hel308	K03726	876.3	4.1e-264	helicase [EC:3.6.4.-]	42.369	25.8791	176.085	163.957	85.9565	50.5373	156.891	152.262	111.412	1.00898	0.354329	0.00266166	0.00839013
Methanoperedens_01095	Digeranylgeranylglycerophospholipid reductase	0	Digeranylgeranylglycerophospholipid reductase 2	774.6	Digeranylgeranylglycerophospholipid reductase	K17830	408.1	8.7e-123	digeranylgeranylglycerophospholipid reductase [EC:1.3.1.101 1.3.7.11]	26.2336	21.3647	109.739	135.221	28.6522	22.461	52.6387	67.4912	42.8108	1.00553	0.513771	0.0273162	0.061799
Methanoperedens_00733	hypothetical protein	0	Protein SphX	619.8	Phosphate ABC transporter substrate-binding protein, PhoT family	K02040	261.3	4.1e-78	phosphate transport system substrate-binding protein	205.331	178.224	961.675	807.961	181.464	151.612	373.256	327.292	258.406	1.00212	0.256196	5.57951e-05	0.000266133
Methanoperedens_00156	hypothetical protein	0		269.2	Zn-ribbon containing protein	K07163	136.3	1.9e-40	uncharacterized protein	33.6921	41.1585	212.324	174.187	14.3261	16.8458	39.6499	33.9489	26.1927	1.00175	0.61359	0.0524271	0.106316
Methanoperedens_00732	hypothetical protein	0	Probable ABC transporter permease protein YqgH	587	Phosphate transport system permease protein	K02037	351	3.3e-105	phosphate transport system permease protein	102.024	91.8349	437.575	463.295	90.7318	78.6135	170.905	188.853	132.276	0.999184	0.307719	0.000694652	0.00257715
Methanoperedens_03525	hypothetical protein	0	Uncharacterized protein slr1608	775	Glucose/sorbosone dehydrogese	K21430	392.7	5.8e-118	aldose sugar dehydrogese [EC:1.1.5.-]	4.56994	0	26.0683	30.9832	4.77536	0	11.9633	13.2136	7.48808	0.9987	1.03112	0.136232	0.226947
Methanoperedens_03123	Xanthine phosphoribosyltransferase	0	Xanthine-guanine phosphoribosyltransferase	489.6	Putative phosphoribosyltransferase	K07101	193.9	5.9e-58	uncharacterized protein	182.798	160.781	784.135	802.678	119.384	101.075	224.911	240.285	171.414	0.998347	0.275958	0.000181041	0.00077585
Methanoperedens_00546	NH(3)-dependent D(+) synthetase	0	NH(3)-dependent D(+) synthetase	508.4	NH(3)-dependent D(+) synthetase	K01916	338.9	1.1e-101	D+ synthase [EC:6.3.1.5]	9.9901	8.13598	57.5293	72.3699	7.16304	5.61525	18.1159	20.3287	12.8057	0.998044	0.818558	0.104164	0.184235
Methanoperedens_00858	GMP synthase [glutamine-hydrolyzing] subunit A	0	GMP synthase [glutamine-hydrolyzing] subunit A	383.3	GMP synthase [glutamine-hydrolyzing] subunit A	K01951	162.5	2.7e-48	GMP synthase (glutamine-hydrolysing) [EC:6.3.5.2]	18.2798	44.6613	131.086	178.26	9.55072	22.461	30.0792	42.6902	26.1953	0.996731	0.695929	0.068885	0.132134
Methanoperedens_00314	Exosome complex component Rrp42	0	Exosome complex component Rrp42	508.1	Exosome complex component Rrp42	K12589	223.6	7.6e-67	exosome complex component RRP42	98.0018	71.8317	388.66	433.853	71.6304	50.5373	124.76	145.35	98.0695	0.996634	0.365097	0.00377223	0.0113247
Methanoperedens_00046	hypothetical protein	0		929.1	Family 3 adenylate cyclase					41.5413	36.907	182.801	190.45	52.5289	44.922	101.517	110.385	77.3383	0.995712	0.377207	0.00485852	0.0141226
Methanoperedens_00170	hypothetical protein	0		113.6	Uncharacterized protein					57.2766	34.9847	280.048	319.17	9.55072	5.61525	20.5086	24.3944	15.0172	0.995381	0.770491	0.0951999	0.171699
Methanoperedens_00244	hypothetical protein	0	Uncharacterized protein MJ0453	193.4	Uncharacterized protein					0	0	67.704	61.3788	0	0	7.51981	7.11503	3.65871	0.995138	1.46865	0.0762538	0.143647
Methanoperedens_00025	hypothetical protein	0		1817.4	PDK repeat-containing protein	K24404	23.8	1.6e-06	dyslexia-associated protein KIAA0319-like protein	43.1011	72.5436	248.828	253.343	107.446	174.073	272.422	289.277	210.804	0.994478	0.319203	0.000945331	0.00338197
Methanoperedens_00366	Inositol 2-dehydrogese/D-chiro-inositol 3-dehydrogese	0		698.7	Putative dehydrogese	K18855	216	1.5e-64	UDP-N-acetylglucosamine 3-dehydrogese [EC:1.1.1.374]	22.8093	18.576	95.8277	124.279	21.4891	16.8458	39.6499	53.0578	32.7607	0.993508	0.577767	0.0452946	0.0944164
Methanoperedens_03296	S-adenosyl-L-methionine-dependent uroporphyrinogen III methyltransferase	0	S-adenosyl-L-methionine-dependent uroporphyrinogen III methyltransferase	501.1	Uroporphyrin-III C-methyltransferase	K02303	387.6	1.3e-116	uroporphyrin-III C-methyltransferase [EC:2.1.1.107]	95.0837	24.8903	345.356	328.001	66.855	16.8458	106.645	105.709	74.0136	0.993449	0.554737	0.0395863	0.0842508
Methanoperedens_01040	hypothetical protein	0	Protein LemA	364.8	Uncharacterized protein	K03744	260.6	4.5e-78	LemA protein	31.3231	0	116.687	129.663	16.7138	0	27.3448	31.7127	18.9428	0.993073	0.809301	0.103045	0.182826
Methanoperedens_01631	Leucine--tR ligase	0	Leucine--tR ligase	1977.6	Leucine--tR ligase	K01869	489.3	5.4e-147	leucyl-tR synthetase [EC:6.1.1.4]	118.564	105.927	512.509	498.313	319.949	275.147	607.395	616.365	454.714	0.992882	0.198711	3.68423e-07	2.41948e-06
Methanoperedens_00512	hypothetical protein	0	Collagese ColH	2020	PDK repeat-containing protein	K20732	25.6	7e-07	transmembrane glycoprotein NMB	234.617	265.19	1059.23	1125.47	670.938	729.983	1330.32	1475.45	1051.67	0.990612	0.174421	7.61037e-09	6.0141e-08
Methanoperedens_01170	putative protein	0	Uncharacterized protein MJ1426	306.6	Putative transcriptiol regulator	K04767	126.4	2.2e-37	acetoin utilization protein AcuB	21.7506	0	88.6229	107.063	9.55072	0	17.0905	21.5484	12.0474	0.990021	0.89478	0.120327	0.20589
Methanoperedens_02839	hypothetical protein	0	tR hydroxylation protein P1	1576.6	Collagese-like protease	K08303	579.7	7.6e-175	putative protease [EC:3.4.-.-]	5.46532	5.34118	26.3659	33.9067	11.9384	11.2305	25.2939	33.9489	20.6029	0.987947	0.692996	0.0766008	0.144205
Methanoperedens_00843	hypothetical protein	0		197.2	Uncharacterized protein	K09148	112.8	2.7e-33	uncharacterized protein	53.1432	0	233.855	195.779	14.3261	0	27.6866	24.1911	16.5509	0.985866	0.82239	0.108453	0.189403
Methanoperedens_02679	hypothetical protein	0	UPF0331 protein AF_0947	241.1	Uncharacterized protein					0	0	52.5091	39.8962	0	0	8.20343	6.50517	3.67715	0.985695	1.46248	0.0769347	0.144641
Methanoperedens_01222	D repair and recombition protein RadB	0	D repair and recombition protein RadB	437.6	D repair and recombition protein RadB	K04484	283.8	1.7e-85	D repair protein RadB	3.87004	0	36.5829	31.6294	2.38768	0	9.91247	8.74133	5.26037	0.984671	1.17094	0.13059	0.220264
Methanoperedens_02328	hypothetical protein	0		628.6	Uncharacterized protein					2.65169	12.9573	54.4538	54.1801	2.38768	11.2305	21.534	15.2465	12.5997	0.983269	0.93764	0.113182	0.196182
Methanoperedens_00942	hypothetical protein	0		150.6	hypothetical protein					79.9208	48.8159	341.919	378.55	19.1014	11.2305	35.89	41.0639	26.8215	0.980563	0.601267	0.0558351	0.112264
Methanoperedens_03094	Circadian clock protein kise KaiC	0	Circadian clock protein kise KaiC	621.3	RecA-superfamily ATPase possibly involved in sigl transduction	K08482	154.8	5.7e-46	circadian clock protein KaiC	155.201	128.653	598.039	706.292	133.71	106.69	226.278	278.909	186.397	0.978796	0.305637	0.000825612	0.00298377
Methanoperedens_01994	hypothetical protein	0	Cobalt-precorrin-5A hydrolase	553.9	Cobalamin biosynthesis protein CbiG	K02189	249.3	1.3e-74	cobalt-precorrin 5A hydrolase [EC:3.7.1.12]	23.7007	28.9529	122.642	132.07	19.1014	22.461	43.4098	48.7888	33.4403	0.978486	0.54526	0.0392507	0.0837249
Methanoperedens_03441	hypothetical protein	0		620.9	ATPase	K06921	78	1.9e-22	uncharacterized protein	5.52507	0	29.7157	34.38	4.77536	0	11.2797	13.6202	7.41882	0.977972	1.02985	0.141495	0.233792
Methanoperedens_01638	Chemotaxis protein CheY	0	Transcriptiol regulatory protein WalR	273.5	Response regulator with CheY-like receiver domain and winged-helix D-binding domain	K07658	148.1	4.7e-44	two-component system, OmpR family, alkaline phosphatase synthesis response regulator PhoP	12.3619	30.2026	130.958	103.328	4.77536	11.2305	22.2176	18.2958	14.1298	0.977432	0.826988	0.105327	0.185598
Methanoperedens_00868	Pyruvate synthase subunit PorB	0	Pyruvate synthase subunit PorB	595.5	2-oxoacid:ferredoxin oxidoreductase, beta subunit	K00170	433.3	9.3e-131	pyruvate ferredoxin oxidoreductase beta subunit [EC:1.2.7.1]	103.334	93.7735	442.688	460.109	83.5688	72.9983	157.232	170.558	121.089	0.976967	0.313823	0.00112492	0.00395956
Methanoperedens_00851	Riboflavin kise	0	Riboflavin kise	420.6	Riboflavin kise	K07732	269.3	6.8e-81	riboflavin kise, archaea type [EC:2.7.1.161]	15.9102	29.1539	108.908	113.778	9.55072	16.8458	28.712	31.3062	21.6037	0.976643	0.674202	0.0729316	0.138678
Methanoperedens_01616	hypothetical protein	0	Uncharacterized protein MTH_1398	194.9	Putative nucleic-acid-binding protein containing a Zn-ribbon	K07068	54.6	2.5e-15	uncharacterized protein	118.818	22.3307	440.927	427.823	31.0398	5.61525	50.5878	51.4315	34.6686	0.975964	0.632692	0.0657767	0.127305
Methanoperedens_02052	hypothetical protein	0		709.1	DUF362 domain-containing protein					2.42014	5.91291	37.8657	23.3758	2.38768	5.61525	16.4069	10.5709	8.74517	0.975417	1.0167	0.130575	0.220264
Methanoperedens_02418	hypothetical protein	0		352.8	Uncharacterized protein					5.11398	12.4945	58.3434	64.5939	2.38768	5.61525	11.9633	13.8235	8.44744	0.974846	0.993253	0.132326	0.222136
Methanoperedens_03093	Exodeoxyribonuclease 7 small subunit	0	Exodeoxyribonuclease 7 small subunit	149.4	Exodeoxyribonuclease VII small subunit	K03602	84.2	1.9e-24	exodeoxyribonuclease VII small subunit [EC:3.1.11.6]	0	0	77.0133	67.8236	0	0	7.51981	6.91175	3.60789	0.973814	1.44927	0.0791517	0.147824
Methanoperedens_01740	Protein-methionine-sulfoxide reductase catalytic subunit MsrP	0	Uncharacterized oxidoreductase YuiH	399.8	Sulfite oxidase-like oxidoreductase	K07147	143.7	1.9e-42	methionine sulfoxide reductase catalytic subunit [EC:1.8.-.-]	22.6092	11.0478	134.128	85.6719	11.9384	5.61525	31.1047	20.7352	17.3484	0.968331	0.763943	0.100099	0.178186
Methanoperedens_01214	hypothetical protein	0		235.7	Uncharacterized protein					59.7669	36.5058	263.002	271.988	19.1014	11.2305	36.9154	39.031	26.5696	0.965761	0.59483	0.0577436	0.115365
Methanoperedens_01032	hypothetical protein	0		208.4	Uncharacterized protein					8.10518	19.8027	124.172	106.892	2.38768	5.61525	16.065	10.5709	8.65972	0.964554	1.01127	0.133589	0.223595
Methanoperedens_00233	hypothetical protein	0		709.5	Putative phosphoesterase, ICC	K03269	67.4	2.2e-19	UDP-2,3-diacylglucosamine hydrolase [EC:3.6.1.54]	14.8129	24.1274	85.3021	104.556	14.3261	22.461	36.2318	43.7066	29.1814	0.962984	0.598878	0.0559211	0.112357
Methanoperedens_00552	Coenzyme A disulfide reductase	0	DH dehydrogese-like protein YjlD	874.4	DH dehydrogese, FAD-containing subunit	K03885	514.8	5.3e-155	DH:ubiquinone reductase (H+-translocating) [EC:7.1.1.2]	0	0	12.1205	15.6313	0	0	6.49438	7.92818	3.60564	0.962731	1.44128	0.0802975	0.149086
Methanoperedens_00174	hypothetical protein	0	Protein translocase subunit SecA	646.7	SEC-C motif domain protein	K07039	44.3	3e-12	uncharacterized protein	55.0736	60.5505	305.181	226.079	47.7536	50.5373	116.215	89.8527	76.0897	0.962242	0.41375	0.0113799	0.0296461
Methanoperedens_02692	hypothetical protein	0		355.9	Dolichol kise	K16368	63.7	3.3e-18	diacylglycerol kise (CTP) [EC:2.7.1.174]	7.84611	0	56.2654	37.1636	4.77536	0	15.0396	10.1643	7.49483	0.958896	1.04054	0.145622	0.239357
Methanoperedens_00097	Bifunctiol protein GlmU	0	Glucose-1-phosphate thymidylyltransferase	649.8	Glucose-1-phosphate thymidylylransferase, long form	K00973	279.1	1.4e-83	glucose-1-phosphate thymidylyltransferase [EC:2.7.7.24]	12.1007	5.91291	55.2208	56.6414	11.9384	5.61525	23.9267	25.8174	16.8244	0.95794	0.722302	0.0957998	0.172342
Methanoperedens_02553	hypothetical protein	0	Uncharacterized protein MJ0921	582.8	tR(Ile2) 2-agmatinylcytidine synthetase	K06932	43.5	2.4e-12	tR(Ile2)-agmatinylcytidine synthase [EC:6.3.4.22]	14.5618	7.11554	62.6549	74.1123	11.9384	5.61525	22.5594	27.4437	16.8892	0.957352	0.731888	0.0978975	0.175449
Methanoperedens_03415	hypothetical protein	0		148.7	Uncharacterized protein					0	0	99.7432	63.3968	0	0	8.88705	5.89531	3.69559	0.957119	1.44179	0.0795947	0.148212
Methanoperedens_00844	Minichromosome maintence protein MCM	0	Minichromosome maintence protein MCM	1343.6	Putative ATPase involved in replication control, Cdc46/Mcm family	K10726	962.8	2.1e-290	replicative D helicase Mcm [EC:3.6.4.-]	53.156	72.4863	274.004	259.01	102.67	134.766	232.43	229.307	174.794	0.956815	0.282008	0.000392771	0.00155194
Methanoperedens_01953	8-amino-7-oxononoate synthase	0	8-amino-7-oxononoate synthase	753.1	8-amino-7-ketopelargote synthase	K00652	526.8	1.2e-158	8-amino-7-oxononoate synthase [EC:2.3.1.47]	69.9045	49.5846	304.304	262.205	74.0181	50.5373	141.509	127.054	98.2797	0.956715	0.35695	0.00456722	0.0134271
Methanoperedens_02714	Glucose import ATP-binding protein GlcV	0	Phosphate import ATP-binding protein PstB 2	454.1	ABC-type phosphate transport system, ATPase component	K06857	288	1.3e-86	tungstate transport system ATP-binding protein [EC:7.3.2.6]	3.65595	0	32.1758	46.8569	2.38768	0	9.22886	8.94462	5.14029	0.956701	1.1574	0.137159	0.228089
Methanoperedens_01929	hypothetical protein	0		315.5	Uncharacterized protein					29.2228	14.2795	142.882	128.102	11.9384	5.61525	25.6357	23.9878	16.7943	0.953415	0.721384	0.0969786	0.174242
Methanoperedens_00155	hypothetical protein	0		481.9	Uncharacterized protein					28.6383	61.2233	189.033	202.141	19.1014	39.3068	55.3731	61.7992	43.8951	0.95141	0.53097	0.0379259	0.0813887
Methanoperedens_02056	hypothetical protein	0		714.9	Membrane protein involved in the export of O-antigen and teichoic acid	K06409	86.1	3.3e-25	stage V sporulation protein B	0	0	17.6254	18.2276	0	0	9.22886	5.69203	3.73022	0.951253	1.43932	0.079694	0.148212
Methanoperedens_00437	D-inositol-3-phosphate glycosyltransferase	0	Phosphatidylinositol N-acetylglucosaminyltransferase subunit A	845.9	Glycosyltransferase	K00754	271	5.2e-81	L-malate glycosyltransferase [EC:2.4.1.-]	4.14048	0	22.9437	24.2261	4.77536	0	11.6215	12.6038	7.25016	0.949908	1.01766	0.149351	0.244495
Methanoperedens_00373	hypothetical protein	0		882.1	Uncharacterized protein	K01187	24	2.4e-06	alpha-glucosidase [EC:3.2.1.20]	35.551	53.0803	189.274	190.401	42.9782	61.7678	100.492	105.506	77.686	0.94946	0.388357	0.00820189	0.0223738
Methanoperedens_03221	hypothetical protein	0		466.1	Uncharacterized protein					14.9417	0	71.8385	57.5893	9.55072	0	20.1668	17.0761	11.6984	0.945846	0.881915	0.132955	0.222927
Methanoperedens_03488	Imidazole glycerol phosphate synthase subunit HisH	0	Imidazole glycerol phosphate synthase subunit HisH	413.7	Imidazole glycerol phosphate synthase subunit HisH	K02501	275.1	9e-83	imidazole glycerol-phosphate synthase subunit HisH [EC:4.3.2.10]	37.9036	20.5792	145.515	175.231	21.4891	11.2305	36.2318	45.3329	28.5711	0.944972	0.598679	0.0638213	0.124355
Methanoperedens_03558	hypothetical protein	0		853.6	Uncharacterized protein	K04763	39.2	7.9e-11	integrase/recombise XerD	27.3366	23.8532	127.931	116.424	33.4275	28.0763	68.7037	64.6452	48.7132	0.942514	0.451702	0.021963	0.0511989
Methanoperedens_01208	hypothetical protein	0		490.3	Methyltransf_25 domain-containing protein	K18896	92.9	4.2e-27	glycine/sarcosine N-methyltransferase [EC:2.1.1.156]	7.12987	0	37.1848	43.0416	4.77536	0	10.9379	13.2136	7.23172	0.93935	1.0193	0.152174	0.24726
Methanoperedens_03163	Deoxyuridine 5'-triphosphate nucleotidohydrolase	0	Probable deoxyuridine 5'-triphosphate nucleotidohydrolase	346.7	Probable deoxyuridine 5'-triphosphate nucleotidohydrolase	K01494	77.1	2.3e-22	dCTP deamise [EC:3.5.4.13]	5.02426	0	40.9427	42.9293	2.38768	0	8.54524	9.35119	5.07103	0.937001	1.14978	0.14179	0.234143
Methanoperedens_00929	hypothetical protein	0	FAD-dependent oxidoreductase domain-containing protein 1	820.5	Glycine/D-amino acid oxidase, deamiting	K00303	168.6	4.2e-50	sarcosine oxidase, subunit beta [EC:1.5.3.1]	2.11093	15.4724	44.7252	45.4837	2.38768	16.8458	22.2176	23.5813	16.2581	0.936634	0.8822	0.115596	0.199601
Methanoperedens_01083	hypothetical protein	0		421	Uncharacterized protein					19.7053	38.5153	123.324	144.944	11.9384	22.461	32.8137	40.2508	26.866	0.93577	0.630613	0.0709568	0.135559
Methanoperedens_01561	D-inositol-3-phosphate glycosyltransferase	0	Uncharacterized glycosyltransferase MJ1178	807.4	Glycosyltransferase	K00754	297.7	4.1e-89	L-malate glycosyltransferase [EC:2.4.1.-]	0	0	9.586	22.2404	0	0	4.78533	11.5873	4.09317	0.935537	1.44777	0.0759064	0.143267
Methanoperedens_00662	hypothetical protein	0	Putative molybdopterin biosynthesis protein MJ0666	774.2	Molybdopterin biosynthesis enzyme	K03750	415.9	5e-125	molybdopterin molybdotransferase [EC:2.10.1.1]	13.1168	5.34118	57.0073	71.8741	14.3261	5.61525	27.3448	27.647	18.7333	0.933262	0.690084	0.095321	0.171808
Methanoperedens_01321	Putative nickel-responsive regulator	0	Putative nickel-responsive regulator	278.9	Putative nickel-responsive regulator	K07722	174.9	3.7e-52	CopG family transcriptiol regulator, nickel-responsive regulator	12.1865	0	65.5432	70.1721	4.77536	0	11.2797	12.6038	7.16471	0.930939	1.01344	0.154796	0.25078
Methanoperedens_01387	Biotin synthase	0		658.3	Biotin synthase-related enzyme	K24689	281.9	1e-84	lipoyl synthase	24.2393	32.901	139.585	119.564	21.4891	28.0763	54.3477	48.5855	38.1247	0.929314	0.513999	0.0398706	0.0847288
Methanoperedens_00224	hypothetical protein	0		143.3	Uncharacterized protein					23.8652	0	147.803	119.689	4.77536	0	12.9888	10.9775	7.1854	0.928983	1.01474	0.155176	0.25106
Methanoperedens_03294	hypothetical protein	0		137.1	Uncharacterized protein					12.2736	0	100.017	102.59	2.38768	0	8.54524	9.1479	5.0202	0.924125	1.14379	0.145051	0.238556
Methanoperedens_03248	hypothetical protein	0	Probable nicotite-nucleotide pyrophosphorylase [carboxylating]	529.6	Nicotite-nucleotide pyrophosphorylase [carboxylating]	K00767	362.9	6.2e-109	nicotite-nucleotide pyrophosphorylase (carboxylating) [EC:2.4.2.19]	0	7.55066	29.2137	33.8687	0	5.61525	9.91247	10.7742	6.57548	0.922517	1.14661	0.121296	0.207188
Methanoperedens_01696	hypothetical protein	0		204.1	type II toxin-antitoxin system mR interferase toxin, RelE/StbE family	K06218	48.9	2.1e-13	mR interferase RelE/StbE	42.3524	14.7823	143.968	168.576	16.7138	0	25.9775	29.8831	18.1436	0.91942	0.803288	0.126309	0.214317
Methanoperedens_00102	hypothetical protein	0	O-antigen export system permease protein RfbA	497.3	Putative permease	K09690	272.3	1.7e-81	lipopolysaccharide transport system permease protein	19.7505	16.0849	101.933	91.7155	14.3261	11.2305	32.4719	29.07	21.7746	0.919065	0.63843	0.0831677	0.153411
Methanoperedens_02242	hypothetical protein	0		1365.9	Putative xylase/chitin deacetylase	K21478	48.1	1.8e-13	poly-beta-1,6-N-acetyl-D-glucosamine N-deacetylase [EC:3.5.1.-]	13.8776	24.6588	79.3676	90.9236	26.2645	44.922	65.9692	72.3701	52.3814	0.917525	0.471459	0.0288715	0.0648523
Methanoperedens_00099	GDP-L-fucose synthase	0	dTDP-glucose 4,6-dehydratase	693.7	dTDP-glucose 4,6-dehydratase	K01710	519.5	1.7e-156	dTDP-glucose 4,6-dehydratase [EC:4.2.1.46]	41.5299	38.0498	159.907	209.726	38.2029	33.6915	64.602	87.8199	56.0791	0.917377	0.469255	0.0298136	0.066547
Methanoperedens_01210	Sulfide dehydrogese subunit beta	0	Sulfide dehydrogese subunit beta	563.5	2-polyprenylphenol hydroxylase-like oxidoreductase	K00528	99.6	4.9e-29	ferredoxin/flavodoxin---DP+ reductase [EC:1.18.1.2 1.19.1.1]	45.6994	29.7742	174.782	193.539	35.8152	22.461	60.1585	69.5241	46.9897	0.91654	0.475032	0.0326679	0.0718441
Methanoperedens_03428	hypothetical protein	0		243.4	Succite dehydrogese subunit C	K00241	59.5	7.6e-17	succite dehydrogese / fumarate reductase, cytochrome b subunit	19.3793	0	84.225	95.9909	7.16304	0	13.6724	16.2629	9.27459	0.915598	0.931186	0.15095	0.245836
Methanoperedens_02219	Poly(3-hydroxyalkanoate) polymerase subunit PhaC	0	Poly(3-hydroxyalkanoate) polymerase subunit PhaC	788.5	PHB synthase subunit PhaC	K03821	362.9	8.6e-109	polyhydroxyalkanoate synthase subunit PhaC [EC:2.3.1.-]	8.76683	0	35.006	39.082	9.55072	0	16.7487	19.5155	11.4537	0.915159	0.877161	0.143109	0.235772
Methanoperedens_01918	hypothetical protein	0		157.1	Putative periplasmic or secreted lipoprotein	K07339	59	8.2e-17	mR interferase HicA [EC:3.1.-.-]	0	0	55.2727	102.89	0	0	5.12714	9.96105	3.77205	0.913191	1.41365	0.0830188	0.153236
Methanoperedens_00298	hypothetical protein	0		545.8	Uncharacterized protein					85.3264	64.6978	361.569	321.902	69.2427	50.5373	128.862	119.736	92.0945	0.913139	0.352906	0.00616952	0.0174332
Methanoperedens_02134	hypothetical protein	0	Circadian clock protein kise KaiC	506.1	RecA-superfamily ATPase possibly involved in sigl transduction	K08482	207.5	6.1e-62	circadian clock protein KaiC	33.6921	8.2317	131.787	116.403	23.8768	5.61525	41.0171	37.8113	27.0801	0.912422	0.636354	0.0859079	0.157442
Methanoperedens_03304	hypothetical protein	0	UPF0147 protein MA_0092	179.5	UPF0147 protein ANME2D_00978	K09721	111.9	2.2e-33	uncharacterized protein	95.461	0	345.393	326.263	23.8768	0	37.9409	37.4048	24.8056	0.910193	0.788774	0.124631	0.211977
Methanoperedens_02441	Biosynthetic arginine decarboxylase	0	Biosynthetic arginine decarboxylase	1248.4	Arginine decarboxylase	K01583	355	2e-106	arginine decarboxylase [EC:4.1.1.19]	91.5151	106.79	407.383	414.312	159.975	179.688	312.756	331.967	246.096	0.909265	0.239171	8.88579e-05	0.000411239
Methanoperedens_01528	2-(3-amino-3-carboxypropyl)histidine synthase	0	2-(3-amino-3-carboxypropyl)histidine synthase	650.6	2-(3-amino-3-carboxypropyl)histidine synthase	K07561	257	8.8e-77	2-(3-amino-3-carboxypropyl)histidine synthase [EC:2.5.1.108]	10.6068	0	43.2173	48.2695	9.55072	0	17.0905	18.9057	11.3867	0.908934	0.873126	0.14497	0.238556
Methanoperedens_00162	hypothetical protein	0		237.7	Uncharacterized protein	K09152	112.4	3e-33	uncharacterized protein	124.715	0	408.78	464.598	42.9782	0	61.8675	73.3865	44.5581	0.908187	0.861328	0.131292	0.220922
Methanoperedens_00787	Segregation and condensation protein B	0	Segregation and condensation protein B homolog	708.4	Segregation and condensation protein B	K06024	149.4	2.2e-44	segregation and condensation protein B	4.70767	0	26.8539	27.982	4.77536	0	11.9633	11.3841	7.03069	0.904519	1.00453	0.162873	0.26091
Methanoperedens_01701	tR-splicing ligase RtcB	0	R-splicing ligase RtcB	993	R-splicing ligase RtcB	K14415	535.4	3.7e-161	tR-splicing ligase RtcB (3'-phosphate/5'-hydroxy nucleic acid ligase) [EC:6.5.1.8]	26.1404	0	134.06	96.4631	35.8152	0	80.667	39.6409	39.0308	0.902789	0.91322	0.138077	0.229162
Methanoperedens_02966	putative tR pseudouridine synthase B	0	Probable tR pseudouridine synthase B	657.5	Probable tR pseudouridine synthase B	K11131	494.1	1e-148	H/ACA ribonucleoprotein complex subunit 4 [EC:5.4.99.-]	18.1146	12.6451	90.2565	78.8311	16.7138	11.2305	36.5736	30.493	23.7527	0.902771	0.6223	0.0833406	0.153526
Methanoperedens_02280	hypothetical protein	0	Putative type I restriction enzyme HindVIIP M protein	1176	Site-specific D-methyltransferase (adenine-specific)	K03427	510.6	1.7e-153	type I restriction enzyme M protein [EC:2.1.1.72]	37.2248	36.3793	160.166	160.138	59.692	56.1525	112.797	117.703	86.5862	0.902565	0.349421	0.00621231	0.017508
Methanoperedens_00541	Phosphoribosylglycimide formyltransferase	0	Phosphoribosylglycimide formyltransferase	389.4	5'-phosphoribosylglycimide transformylase	K11175	322.3	9.8e-97	phosphoribosylglycimide formyltransferase 1 [EC:2.1.2.2]	46.7853	20.783	170.524	188.026	26.2645	11.2305	42.0426	48.3822	31.9799	0.899232	0.567065	0.0669997	0.129217
Methanoperedens_01614	hypothetical protein	0		628.2	ABC-type nitrate/sulfote/bicarbote transport system, periplasmic component	K02051	107.7	1.9e-31	NitT/TauT family transport system substrate-binding protein	0	13.5863	51.6594	60.9418	0	11.2305	19.4831	14.4334	11.2868	0.897619	1.07025	0.13129	0.220922
Methanoperedens_00962	hypothetical protein	0		423.7	Uncharacterized protein					381.398	333.499	1586.07	1451.92	226.83	190.919	414.273	395.799	306.955	0.897153	0.224413	4.34214e-05	0.000210216
Methanoperedens_01402	hypothetical protein	0	UPF0331 protein MJ1216	234.6	Uncharacterized protein	K07075	53.9	4.5e-15	uncharacterized protein	7.47086	0	51.1392	72.1601	2.38768	0	7.178	10.5709	5.03415	0.896313	1.14467	0.150157	0.245249
Methanoperedens_02121	hypothetical protein	0		263.1	Uncharacterized protein					0	0	41.2474	43.2982	0	0	6.49438	7.11503	3.40235	0.896106	1.38074	0.0915425	0.166159
Methanoperedens_02196	hypothetical protein	0	Subtilisin BPN'	968.4	Subtilisin-like serine protease	K01342	434.4	1.1e-130	subtilisin [EC:3.4.21.62]	24.8309	20.2224	105.22	103.008	35.8152	28.0763	66.6528	67.8978	49.6105	0.895525	0.443204	0.0270476	0.0613373
Methanoperedens_01816	50S ribosomal protein L44e	0	50S ribosomal protein L44e	182.2	50S ribosomal protein L44e	K02929	50.7	4.1e-14	large subunit ribosomal protein L44e	299.703	244.079	1191.83	1213.59	71.6304	56.1525	125.102	132.95	96.4587	0.894768	0.340369	0.00559102	0.0159735
Methanoperedens_01589	hypothetical protein	0	PGL/p-HBAD biosynthesis glycosyltransferase Mb2981	597.8	Glycosyl transferase	K13683	166.7	1.1e-49	putative colanic acid biosynthesis glycosyltransferase [EC:2.4.-.-]	5.92516	7.23822	35.7303	46.7749	4.77536	5.61525	12.647	17.2794	10.0792	0.884783	0.885785	0.151225	0.246142
Methanoperedens_00766	hypothetical protein	1	Archaeal-type glutamate synthase [DPH]	1010.4	Archaeal glutamate synthase [DPH]	K22083	381.7	1e-114	methylamine---glutamate N-methyltransferase subunit C [EC:2.1.1.21]	0	0	9.46485	12.3734	0	0	5.81076	7.92818	3.43474	0.884425	1.37451	0.092411	0.167586
Methanoperedens_01056	D(P)H-quinone oxidoreductase subunit 2, chloroplastic	0	(+)/H(+) antiporter subunit A	1154.8	Formate hydrogenlyase subunit 3/multisubunit +/H+ antiporter, MnhD subunit	K05568	412.6	5.9e-124	multicomponent +:H+ antiporter subunit D	31.6075	49.1424	177.489	209.489	52.5289	78.6135	129.546	115.264	93.988	0.883919	0.37287	0.0105513	0.0278197
Methanoperedens_01774	hypothetical protein	0	Putative type I restriction enzyme MjaXP M protein	1024.2	Site-specific D-methyltransferase (adenine-specific)	K03427	462.1	8.2e-139	type I restriction enzyme M protein [EC:2.1.1.72]	21.5617	28.366	96.2328	116.762	31.0398	39.3068	60.8421	77.249	52.1094	0.876668	0.468772	0.0366741	0.0792417
Methanoperedens_00316	Exosome complex component Rrp4	0	Exosome complex component Rrp4	492.7	Exosome complex component Rrp4	K03679	169.5	2.5e-50	exosome complex component RRP4	80.7471	157.826	522.195	440.358	59.692	112.305	169.537	149.212	122.687	0.875812	0.396443	0.015552	0.0384666
Methanoperedens_00917	hypothetical protein	0	Iron-sulfur flavoprotein	439.5	Multimeric flavodoxin WrbA					12.0441	19.6176	68.0491	108.876	7.16304	11.2305	17.7741	25.6141	15.4454	0.871776	0.772655	0.131952	0.221849
Methanoperedens_02629	Glutamine--fructose-6-phosphate aminotransferase [isomerizing]	0	Glutamine--fructose-6-phosphate aminotransferase [isomerizing]	1171	Glutamine--fructose-6-phosphate aminotransferase [isomerizing]	K00820	812.9	5.2e-245	glutamine---fructose-6-phosphate transamise (isomerizing) [EC:2.6.1.16]	105.785	150.184	516.761	501.325	176.688	241.456	379.067	383.602	295.203	0.871611	0.252206	0.000332102	0.00134213
Methanoperedens_03089	Ribonuclease HII	0	Ribonuclease HII	429.1	Ribonuclease HII	K03470	155.1	6.4e-46	ribonuclease HII [EC:3.1.26.4]	7.7751	9.49811	72.2296	50.5473	4.77536	5.61525	19.4831	11.3841	10.3145	0.870245	0.908546	0.156507	0.252403
Methanoperedens_02264	hypothetical protein	3		329.3	MULTIHEME_CYTC domain-containing protein	K04013	26.3	8.3e-07	cytochrome c-type protein NrfB	114.553	139.939	519.023	535.141	47.7536	56.1525	95.023	102.253	75.2956	0.86793	0.375728	0.013088	0.0333046
Methanoperedens_02421	hypothetical protein	0		660.6	Uncharacterized protein					15.6209	6.36086	64.496	62.3832	14.3261	5.61525	25.9775	26.224	18.0357	0.865186	0.686598	0.118831	0.203823
Methanoperedens_01647	Sensor histidine kise RcsC	0	Sensor kise CckA	1308.1	PAS domain S-box	K13587	595.8	1.8e-179	two-component system, cell cycle sensor histidine kise and response regulator CckA [EC:2.7.13.3]	26.8884	6.25658	84.724	95.1326	50.1413	11.2305	69.3873	77.249	52.002	0.863519	0.58395	0.0833227	0.153526
Methanoperedens_00594	hypothetical protein	0		230.7	B-block binding subunit of TFIIIC	K06075	30.1	7.3e-08	MarR family transcriptiol regulator, transcriptiol regulator for hemolysin	45.6185	0	183.394	152.524	14.3261	0	25.2939	21.955	15.3937	0.863466	0.811997	0.150399	0.245501
Methanoperedens_02842	Sensor histidine kise RcsC	0	Sensor kise CckA	1542.7	PAS domain S-box	K13587	527.5	8.5e-159	two-component system, cell cycle sensor histidine kise and response regulator CckA [EC:2.7.13.3]	0	0	5.24435	9.36391	0	0	5.12714	8.94462	3.51794	0.862101	1.36309	0.0937882	0.1698
Methanoperedens_02116	putative tR pseudouridine synthase D	0	Probable tR pseudouridine synthase D	499.6	TRUD domain-containing protein	K06176	157.7	7.9e-47	tR pseudouridine13 synthase [EC:5.4.99.27]	0	0	21.3691	21.1498	0	0	6.49438	6.70846	3.30071	0.861827	1.35147	0.0982129	0.175681
Methanoperedens_00588	hypothetical protein	0	DUF21 domain-containing protein At1g55930, chloroplastic	626.3	CBS domain-containing protein	K03699	384.9	1.6e-115	putative hemolysin	12.6345	6.17377	54.3623	60.5484	11.9384	5.61525	22.5594	23.5813	15.9236	0.860613	0.714618	0.128698	0.217849
Methanoperedens_01238	Flagellin B2	0	Flagellin B2	398.7	Archaeal flagellin	K07325	170.2	9.1e-51	archaeal flagellin FlaB	32.7295	29.9869	144.025	150.466	19.1014	16.8458	36.9154	40.2508	28.2783	0.860188	0.561279	0.075756	0.143089
Methanoperedens_00203	hypothetical protein	0		989.2	Uncharacterized protein					10.4988	0	41.0661	35.7522	14.3261	0	24.6103	22.3615	15.3245	0.859168	0.808663	0.151709	0.246646
Methanoperedens_02517	30S ribosomal protein S5	0	30S ribosomal protein S5	406.8	30S ribosomal protein S5	K02988	175	3.8e-52	small subunit ribosomal protein S5	24.7831	10.0917	106.364	94.3699	14.3261	5.61525	27.0029	25.0043	17.9871	0.858033	0.687868	0.121954	0.208174
Methanoperedens_00794	D(P)H-quinone oxidoreductase subunit I, chloroplastic	0	H(2):CoB-CoM heterodisulfide,ferredoxin reductase subunit A	1956	CoB--CoM heterodisulfide reductase iron-sulfur subunit A	K03388	1233.3	0	heterodisulfide reductase subunit A2 [EC:1.8.7.3 1.8.98.4 1.8.98.5 1.8.98.6]	221.961	309.295	1006.3	1116.94	627.96	842.288	1250.34	1448.62	1042.3	0.855334	0.236435	0.000179643	0.000772194
Methanoperedens_01910	hypothetical protein	0		821.6	Uncharacterized protein	K22881	60.9	3.2e-17	polyhydroxyalkanoate synthase subunit PhaE	61.3678	86.3259	344.302	256.994	78.7934	106.69	194.148	149.822	132.363	0.854769	0.357099	0.0102396	0.0270735
Methanoperedens_03028	Putative sulfur carrier protein/Ta1414	0	Putative sulfur carrier protein YrkI	168.3	Putative redox protein, regulator of disulfide bond formation	K04085	82.9	3.3e-24	tR 2-thiouridine synthesizing protein A [EC:2.8.1.-]	41.9097	51.1972	232.235	227.7	9.55072	11.2305	23.243	23.7845	16.9522	0.853504	0.695819	0.123038	0.20977
Methanoperedens_00296	hypothetical protein	0		568.9	DUF58 domain-containing protein	K07114	24.3	2.7e-06	Ca-activated chloride channel homolog	47.7305	51.0194	230.456	191.724	38.2029	39.3068	81.0088	70.3372	57.2139	0.853249	0.424669	0.0282633	0.0635364
Methanoperedens_02414	hypothetical protein	0	M-protease	784.6	Subtilisin-like serine protease	K01342	413.3	2.8e-124	subtilisin [EC:3.4.21.62]	6.59194	21.474	67.3262	64.487	7.16304	22.461	32.1301	27.4437	22.2995	0.85248	0.708096	0.117288	0.201664
Methanoperedens_02925	F420-dependent DP reductase	0	F420-dependent DP reductase	437.2	DPH-dependent F420 reductase	K06988	156	2.8e-46	8-hydroxy-5-deazaflavin:DPH oxidoreductase [EC:1.5.1.40]	11.7692	28.7546	86.9556	95.4595	7.16304	16.8458	23.243	26.6306	18.4706	0.851804	0.71665	0.123894	0.21085
Methanoperedens_01598	D-inositol-3-phosphate glycosyltransferase	0	Amylovoran biosynthesis glycosyltransferase AmsK	734.2	Glycosyltransferase	K00754	204.6	6.9e-61	L-malate glycosyltransferase [EC:2.4.1.-]	16.6134	11.5971	75.0406	67.008	16.7138	11.2305	33.1555	30.8996	22.9998	0.850675	0.610868	0.0981012	0.175592
Methanoperedens_02433	D mismatch repair protein MutL	0	D mismatch repair protein MutL	1104.7	D mismatch repair protein MutL	K03572	650.1	6.3e-196	D mismatch repair protein MutL	32.5323	39.7417	150.869	142.83	52.5289	61.7678	106.986	105.709	81.748	0.848064	0.358264	0.0115489	0.0300313
Methanoperedens_00896	hypothetical protein	0		438	RLAN domain-containing protein					3.97754	38.8719	85.5703	136.682	2.38768	22.461	22.5594	37.608	21.254	0.84785	0.905716	0.142703	0.235377
Methanoperedens_02190	Chaperone protein DK	0	Chaperone protein DK	1132.1	Chaperone protein DK	K04043	848.5	1.1e-255	molecular chaperone DK	171.273	244.95	901.873	749.558	293.685	404.298	679.175	589.125	491.571	0.84779	0.255392	0.000545571	0.0020916
Methanoperedens_00282	hypothetical protein	0	Uncharacterized protein MJ1680	265.8	Putative toxin-antitoxin system toxin component, PIN family	K07063	141	7.7e-42	uncharacterized protein	0	0	45.6816	30.5588	0	0	7.86162	5.48874	3.33759	0.844048	1.34088	0.100116	0.178186
Methanoperedens_03413	hypothetical protein	5		785.8	Nitrate reductase cytochrome c-type subunit (pB)/pC/NirT cytochrome c family, N-termil region	K10535	44.8	1.2e-12	hydroxylamine dehydrogese [EC:1.7.2.6]	911.664	836.554	3403.03	3586.95	1036.25	915.286	1698.79	1868.41	1379.69	0.843974	0.170606	5.28054e-07	3.37407e-06
Methanoperedens_02475	hypothetical protein	0		604	Phosphate/phosphite/phosphote ABC transporter, periplasmic binding protein	K02044	233.8	9.2e-70	phosphote transport system substrate-binding protein	22.1003	26.9979	124.266	94.4168	19.1014	22.461	47.1697	37.4048	31.5342	0.843302	0.558142	0.0782404	0.146513
Methanoperedens_02425	hypothetical protein	0		365.2	Uncharacterized protein					0	0	26.0154	31.3938	0	0	5.81076	7.31832	3.28227	0.842697	1.33779	0.101367	0.180186
Methanoperedens_02741	hypothetical protein	0		412.9	Putative Fe-S oxidoreductase	K06940	65.1	1.2e-18	uncharacterized protein	8.02943	9.8088	51.0368	55.1836	4.77536	5.61525	13.3306	15.0432	9.6911	0.84041	0.864163	0.167217	0.267138
Methanoperedens_00867	Pyruvate synthase subunit PorA	0	Pyruvate synthase subunit PorA	766.9	2-oxoacid:ferredoxin oxidoreductase, alpha subunit	K00169	527.2	5.8e-159	pyruvate ferredoxin oxidoreductase alpha subunit [EC:1.2.7.1]	117.634	71.8513	411.513	407.741	133.71	78.6135	205.427	212.435	157.546	0.838568	0.32638	0.0070833	0.0196052
Methanoperedens_00103	Vitamin B12 import ATP-binding protein BtuD	0	ABC transporter protein AbcA	1194.1	ABC-type polysaccharide/polyol phosphate transport system, ATPase component	K09691	441.9	8.9e-133	lipopolysaccharide transport system ATP-binding protein	2.90253	3.54575	20.3413	26.6873	4.77536	5.61525	14.6978	13.6202	9.67716	0.838202	0.862031	0.167923	0.267639
Methanoperedens_00937	Choline trimethylamine-lyase activating enzyme	0		500.7	Aerobic ribonucleoside-triphosphate reductase activating protein	K04069	148.9	3.3e-44	pyruvate formate lyase activating enzyme [EC:1.97.1.4]	0	0	33.7408	14.0999	0	0	10.2543	4.47231	3.68165	0.836297	1.35083	0.0945287	0.170597
Methanoperedens_03507	hypothetical protein	0		886.7	Phosphoglyceromutase	K15633	69	5.4e-20	2,3-bisphosphoglycerate-independent phosphoglycerate mutase [EC:5.4.2.12]	53.3396	18.6171	163.31	183.647	66.855	22.461	89.8959	105.099	71.0778	0.836274	0.501834	0.061251	0.120589
Methanoperedens_00487	UDP-4-amino-4-deoxy-L-arabinose--oxoglutarate aminotransferase	0	Uncharacterized protein MJ1066	711.8	Putative PLP-dependent enzyme possibly involved in cell wall biogenesis	K13010	365.4	1.4e-109	perosamine synthetase [EC:2.6.1.102]	0	0	15.689	13.4105	0	0	6.83619	6.0986	3.2337	0.835808	1.33041	0.103545	0.183484
Methanoperedens_00359	hypothetical protein	0	Uncharacterized HTH-type transcriptiol regulator MJ1545	513.5	Putative transcriptiol regulator	K07731	308.2	5.5e-93	putative transcriptiol regulator	0	0	29.59	36.7346	0	0	9.57067	4.67559	3.56156	0.834135	1.34418	0.0971079	0.17428
Methanoperedens_00144	ATP-dependent zinc metalloprotease FtsH	0	Cell division protein C	1426.8	AAA+ family ATPase	K13525	158.6	4.9e-47	transitiol endoplasmic reticulum ATPase	92.5237	108.624	368.567	425.634	183.851	207.764	321.643	387.668	275.232	0.833873	0.26022	0.000888522	0.00319485
Methanoperedens_02445	Archaeosortase A	0		476.1	Archaeosortase A, PGF-CTERM-specific	K24447	273.8	3e-82	archaeosortase A [EC:3.4.22.-]	15.7932	15.4344	89.5743	105.608	11.9384	11.2305	29.7374	22.9714	18.9694	0.833717	0.677135	0.125241	0.212887
Methanoperedens_01899	hypothetical protein	0		881.7	Erythromycin esterase-like enzyme	K06880	237.1	9.2e-71	erythromycin esterase [EC:3.1.1.-]	27.1514	42.645	139.076	141.573	33.4275	50.5373	75.1981	77.8588	59.2554	0.833262	0.426822	0.0316906	0.0702942
Methanoperedens_02057	hypothetical protein	0		550.1	Putative membrane protein	K08153	23.5	4.4e-06	MFS transporter, DHA1 family, multidrug resistance protein	20.8821	21.8655	92.377	102.511	16.7138	16.8458	32.4719	37.608	25.9099	0.830344	0.584626	0.0944216	0.170512
Methanoperedens_00201	hypothetical protein	0		1095.1	Uncharacterized protein	K18424	47.2	2.6e-13	ectonucleotide pyrophosphatase/phosphodiesterase family member 4 [EC:3.6.1.29]	4.84482	0	20.0034	21.8979	7.16304	0	12.9888	14.8399	8.74793	0.830342	0.912018	0.181682	0.283739
Methanoperedens_02855	Type-4 uracil-D glycosylase	0	Type-4 uracil-D glycosylase	383.3	Type-4 uracil-D glycosylase	K21929	214.4	5.4e-64	uracil-D glycosylase [EC:3.2.2.27]	4.38341	10.7096	48.5798	45.5957	2.38768	5.61525	11.6215	11.1808	7.70131	0.829691	0.952416	0.178007	0.279937
Methanoperedens_02676	hypothetical protein	0		295	Cas6b_N domain-containing protein					30.4663	0	105.266	121.103	11.9384	0	18.1159	21.7517	12.9515	0.827636	0.833528	0.170329	0.270866
Methanoperedens_01403	hypothetical protein	0	Uncharacterized protein MJ1215	194.9	Putative nucleotidyltransferase	K07075	108.7	8.9e-32	uncharacterized protein	0	0	60.629	49.3562	0	0	7.178	5.69203	3.21751	0.820926	1.31968	0.106281	0.186815
Methanoperedens_02995	hypothetical protein	0		605.1	Uncharacterized protein					2.82615	0	24.8727	18.3733	2.38768	0	9.22886	7.11503	4.68289	0.820807	1.10343	0.173665	0.275244
Methanoperedens_01820	hypothetical protein	0		427.2	Methyltransferase family protein	K00568	28.5	1.6e-07	2-polyprenyl-6-hydroxyphenyl methylase / 3-demethylubiquinone-9 3-methyltransferase [EC:2.1.1.222 2.1.1.64]	0	21.3105	59.7057	78.5774	0	11.2305	14.356	16.8728	10.6148	0.81912	1.03518	0.156196	0.252208
Methanoperedens_02168	hypothetical protein	0	D polymerase II large subunit	3209.5	D polymerase II large subunit	K02322	1705.6	0	D polymerase II large subunit [EC:2.7.7.7]	18.712	16.9808	72.4954	77.0615	83.5688	72.9983	142.193	150.229	112.247	0.81679	0.312488	0.0062134	0.017508
Methanoperedens_01482	Elongation factor 1-alpha	0	Elongation factor 1-alpha	850.9	Elongation factor 1-alpha	K03231	621.6	3.3e-187	elongation factor 1-alpha	649.947	774.13	2819.68	2667.67	764.057	875.98	1455.77	1437.44	1133.31	0.815907	0.163441	3.95939e-07	2.55872e-06
Methanoperedens_02887	Global nitrogen regulator NrpRII	0	Global nitrogen regulator NrpRII	486.1	NRD1_2 domain-containing protein	K21640	371.6	2.9e-112	global nitrogen regulator NrpRII	40.9119	66.6376	221.149	230.512	28.6522	44.922	68.0201	65.0517	51.6615	0.81536	0.45225	0.0449661	0.0938007
Methanoperedens_02247	hypothetical protein	0	Probable fused nickel transport protein LarMN	228.8	PDGLE domain-containing protein	K02007	35	1.4e-09	cobalt/nickel transport system permease protein	216.655	255.541	791.441	1121.26	69.2427	78.6135	111.088	164.256	105.8	0.815341	0.404188	0.0279821	0.0630237
Methanoperedens_00206	hypothetical protein	0		1025.4	Uncharacterized protein	K21306	39.5	4.2e-11	dolichyl-phosphooligosaccharide-protein glycotransferase [EC:2.4.99.21]	0	0	9.45754	10.4793	0	0	6.15257	6.50517	3.16444	0.814287	1.31296	0.108488	0.189403
Methanoperedens_02942	hypothetical protein	0		612.8	S-layer domain-containing protein					49.4079	13.4127	139.577	178.959	42.9782	11.2305	53.3223	71.7602	44.8228	0.812721	0.592703	0.105794	0.18619
Methanoperedens_03393	Fructose-1,6-bisphosphate aldolase/phosphatase	0	Fructose-1,6-bisphosphate aldolase/phosphatase	761.9	Fructose-1,6-bisphosphate aldolase/phosphatase	K01622	620.1	5.5e-187	fructose 1,6-bisphosphate aldolase/phosphatase [EC:4.1.2.13 3.1.3.11]	481.679	401.711	1825.98	1686.18	496.637	398.683	826.837	796.884	629.76	0.812133	0.199267	3.35897e-05	0.000166307
Methanoperedens_00272	UDP-N-acetylglucosamine 3-dehydrogese	0	UDP-N-acetylglucosamine 3-dehydrogese	613.2	Putative dehydrogese	K18855	406.9	1.5e-122	UDP-N-acetylglucosamine 3-dehydrogese [EC:1.1.1.374]	5.52507	6.74946	36.9195	37.972	4.77536	5.61525	14.0142	13.6202	9.50625	0.811148	0.85643	0.178841	0.280782
Methanoperedens_02792	tR sulfurtransferase	0	Probable tR sulfurtransferase	771.5	Probable tR sulfurtransferase	K03151	488.1	8.4e-147	tR uracil 4-sulfurtransferase [EC:2.8.1.4]	57.5718	48.6901	202.818	241.845	62.0797	50.5373	96.0485	119.533	82.0495	0.810996	0.38494	0.0237612	0.0550739
Methanoperedens_00952	hypothetical protein	0		457.2	Uncharacterized protein					11.0147	26.9113	76.5944	94.7962	7.16304	16.8458	21.8758	26.6306	18.1288	0.809314	0.718047	0.14208	0.234486
Methanoperedens_02806	hypothetical protein	0		153.7	Uncharacterized protein					20.4559	0	96.6833	108.29	4.77536	0	9.91247	11.5873	6.56879	0.806527	0.98041	0.196872	0.30158
Methanoperedens_00336	putative protein	0	Uncharacterized protein MJ1225	605.9	Putative transcriptiol regulator	K04767	106.7	2.2e-31	acetoin utilization protein AcuB	48.6311	66.0089	227.209	221.813	42.9782	56.1525	88.1868	89.8527	69.2926	0.80609	0.387156	0.0244726	0.0564462
Methanoperedens_03152	hypothetical protein	0		474.9	Uncharacterized protein					3.4366	0	19.0433	35.1087	2.38768	0	5.81076	11.1808	4.8448	0.801951	1.11891	0.174388	0.276086
Methanoperedens_02669	hypothetical protein	0	Biotin synthase	542	Biotin synthetase-like uncharacterized protein	K09711	250.9	2.9e-75	lipoyl synthase	16.1494	0	60.0103	56.9946	11.9384	0	19.4831	19.3122	12.6834	0.801509	0.822296	0.180785	0.282892
Methanoperedens_01588	Dolichyl-phosphooligosaccharide-protein glycotransferase 3	0	Dolichyl-phosphooligosaccharide-protein glycotransferase 3	1688.3	Oligosaccharyl transferase	K21306	608.1	6.8e-183	dolichyl-phosphooligosaccharide-protein glycotransferase [EC:2.4.99.21]	149.067	167.336	572.244	652.371	353.377	381.837	595.774	697.07	507.014	0.797008	0.213984	0.00013466	0.000603524
Methanoperedens_01827	putative protein	0	Uncharacterized protein MJ1198	1380.5	RecJ-like exonuclease with DJ-type Zn-finger domain	K07463	992.7	1.6e-299	archaea-specific RecJ-like exonuclease	102.512	107.339	414.105	396.695	200.565	202.149	355.824	355.752	278.572	0.794894	0.217382	0.000180653	0.000775357
Methanoperedens_00485	hypothetical protein	0		688	Putative methicillin resistance protein	K11693	148.4	5.5e-44	peptidoglycan pentaglycine glycine transferase (the first glycine) [EC:2.3.2.16]	5.08372	0	25.6849	24.5515	4.77536	0	10.5961	10.5709	6.48559	0.793532	0.973655	0.202261	0.308171
Methanoperedens_00238	hypothetical protein	0	Carbamoyl-phosphate synthase large chain	735.7	Putative ATP-dependent carboligase	K06913	331.9	1e-99	uncharacterized protein	7.0422	17.2056	43.6141	68.8919	7.16304	16.8458	19.4831	30.0864	18.3946	0.791373	0.74725	0.155841	0.251778
Methanoperedens_01137	hypothetical protein	0		735.7	Parallel beta-helix repeat (Two copies)	K11493	199.2	2.6e-59	regulator of chromosome condensation	53.289	29.2277	182.563	169.887	116.996	61.7678	176.032	169.541	131.084	0.789143	0.36014	0.0202646	0.047909
Methanoperedens_03317	F(420)H(2) dehydrogese subunit L	0	F(420)H(2) dehydrogese subunit L	1258.4	F420H2 dehydrogese subunit L	K22167	905.5	4.6e-273	F420H2 dehydrogese subunit L [EC:1.5.98.3]	98.6334	110.979	382.845	420.176	181.464	196.534	309.338	353.922	260.314	0.789053	0.245217	0.000894977	0.00321399
Methanoperedens_02552	Indolepyruvate oxidoreductase subunit IorA	0	Indolepyruvate oxidoreductase subunit IorA	962.2	Indolepyruvate oxidoreductase subunit IorA	K00179	481.3	8.3e-145	indolepyruvate ferredoxin oxidoreductase, alpha subunit [EC:1.2.7.8]	49.7577	52.6797	185.437	220.893	71.6304	72.9983	117.241	144.13	101.5	0.784734	0.350692	0.0173027	0.0419196
Methanoperedens_00184	hypothetical protein	0	Anticodon nuclease	754.6	AAA_13 domain-containing protein					15.8682	27.6924	72.4135	108.636	16.7138	28.0763	33.4973	52.448	32.6838	0.784281	0.608333	0.117004	0.201421
Methanoperedens_01695	hypothetical protein	0		121.7	Uncharacterized protein					26.4354	0	133.561	125.213	4.77536	0	10.5961	10.3676	6.43477	0.78294	0.970747	0.20654	0.313511
Methanoperedens_00899	Nicotimide-nucleotide adenylyltransferase	0	Nicotimide-nucleotide adenylyltransferase	345.9	Nicotimide-nucleotide adenylyltransferase	K00952	245.6	1e-73	nicotimide-nucleotide adenylyltransferase [EC:2.7.7.1]	150.728	270.058	828.681	771.794	71.6304	123.536	172.956	162.426	132.637	0.782815	0.358131	0.0185005	0.0441801
Methanoperedens_01131	hypothetical protein	0		303.5	Nitrous-oxide reductase	K02275	63.4	5.2e-18	cytochrome c oxidase subunit II [EC:7.1.1.9]	492.579	489.786	1818.45	1963.96	205.34	196.534	332.922	375.267	277.516	0.779515	0.234721	0.000644247	0.00242404
Methanoperedens_03050	Vitamin B12-dependent ribonucleoside-diphosphate reductase	0	Vitamin B12-dependent ribonucleoside-diphosphate reductase	1346.3	Vitamin B12-dependent ribonucleotide reductase	K00525	835.6	7.5e-252	ribonucleoside-diphosphate reductase alpha chain [EC:1.17.4.1]	16.4008	12.3294	65.3857	61.3968	31.0398	22.461	54.3477	51.8381	39.9217	0.779042	0.477095	0.0695181	0.1329
Methanoperedens_03440	hypothetical protein	0		1129	Putative transporter component	K06921	72	1.2e-20	uncharacterized protein	6.91004	0	25.5272	23.3174	14.3261	0	23.243	20.7352	14.5761	0.777811	0.801328	0.187514	0.290823
Methanoperedens_02051	UDP-N-acetylglucosamine 3-dehydrogese	0	Uncharacterized oxidoreductase sll0816	674.5	Putative dehydrogese	K18855	276.8	5e-83	UDP-N-acetylglucosamine 3-dehydrogese [EC:1.1.1.374]	10.3201	0	50.4591	31.1502	9.55072	0	20.5086	13.0103	10.7674	0.777725	0.885381	0.198804	0.303653
Methanoperedens_01867	hypothetical protein	0		268.9	Putative nucleic acid-binding protein, contains PIN domain	K07064	74.9	2.3e-21	uncharacterized protein	11.8503	0	73.392	46.2246	4.77536	0	12.9888	8.53804	6.57554	0.775166	0.986577	0.207308	0.314006
Methanoperedens_01241	Putative flagella-related protein H	0	Putative flagella-related protein H	443	Putative ATPase involved in flagella biogenesis	K07331	208.8	1.4e-62	archaeal flagellar protein FlaH	0	0	18.185	24.8704	0	0	5.12714	7.31832	3.11137	0.772192	1.28402	0.11714	0.201532
Methanoperedens_01246	Chemotaxis protein CheA	0	Chemotaxis protein CheA	1217.2	Chemotaxis protein CheA	K03407	722.8	1.2e-217	two-component system, chemotaxis family, sensor kise CheA [EC:2.7.13.3]	1.33408	0	10.8714	8.42529	2.38768	0	8.54524	6.91175	4.46117	0.769584	1.07986	0.191793	0.295845
Methanoperedens_03427	Tetrahydromethanopterin S-methyltransferase subunit E	0	Tetrahydromethanopterin S-methyltransferase subunit E	555.1	N5-methyltetrahydromethanopterin--coenzyme M methyltransferase subunit E	K00581	333.4	2.1e-100	tetrahydromethanopterin S-methyltransferase subunit E [EC:2.1.1.86]	0	0	40.9594	48.3097	0	0	14.6978	3.0493	4.43678	0.769423	1.32622	0.0913048	0.165833
Methanoperedens_00261	hypothetical protein	0		521.5	Uncharacterized protein					41.6751	70.4916	202.722	221.513	31.0398	50.5373	66.311	75.6227	55.8777	0.76785	0.448944	0.056645	0.11341
Methanoperedens_00657	hypothetical protein	0		356.3	Uncharacterized protein					18.8824	0	75.3976	65.763	9.55072	0	16.7487	15.2465	10.3865	0.766314	0.851111	0.202952	0.308892
Methanoperedens_00922	Fumarate reductase (CoM/CoB) subunit B	0	Succite dehydrogese iron-sulfur subunit	499.6	Succite dehydrogese and fumarate reductase iron-sulfur protein	K00240	302.9	4.8e-91	succite dehydrogese / fumarate reductase, iron-sulfur subunit [EC:1.3.5.1 1.3.5.4]	0	0	21.0036	19.2832	0	0	6.15257	5.89531	3.01197	0.764712	1.27475	0.121304	0.207188
Methanoperedens_01531	hypothetical protein	0		406	TfuA domain-containing protein	K24410	296.1	2.1e-89	TfuA protein	11.9326	0	54.4538	43.5903	7.16304	0	14.356	11.9939	8.37824	0.763471	0.900074	0.21016	0.317478
Methanoperedens_03041	hypothetical protein	0	Macrolide export ATP-binding/permease protein MacB	756.5	ABC-type transport system, involved in lipoprotein release, permease component	K02004	79	4.7e-23	putative ABC transport system permease protein	23.5677	31.4077	122.914	99.4919	26.2645	33.6915	60.1585	49.1954	42.3275	0.763089	0.48801	0.0773717	0.145367
Methanoperedens_00816	Adaptive-response sensory-kise SasA	0	Cyanobacterial phytochrome A	1489.6	PAS domain S-box					8.41272	12.8463	40.4476	45.1213	19.1014	28.0763	40.3335	45.5362	33.2619	0.762791	0.530997	0.0971224	0.17428
Methanoperedens_01882	Crotonobetainyl-CoA reductase	0	Probable acyl-CoA dehydrogese YngJ	792.7	Acyl-CoA dehydrogese	K04117	351.5	8.9e-106	cyclohexanecarboxyl-CoA dehydrogese [EC:1.3.99.-]	8.59149	0	25.2043	41.0931	9.55072	0	12.3051	20.9385	10.6986	0.760973	0.893069	0.207022	0.313908
Methanoperedens_01914	Glycosyltransferase AglD	0	Dolichyl-phosphate beta-glucosyltransferase ALG5C	457.2	Glycosyl transferase	K00729	210.9	5.6e-63	dolichyl-phosphate beta-glucosyltransferase [EC:2.4.1.117]	3.73543	0	28.0048	25.6724	2.38768	0	7.86162	7.31832	4.3919	0.759993	1.07334	0.196103	0.300694
Methanoperedens_03533	Aspartyl/glutamyl-tR(Asn/Gln) amidotransferase subunit B	0	Aspartyl/glutamyl-tR(Asn/Gln) amidotransferase subunit B	939.1	Aspartyl/glutamyl-tR(Asn/Gln) amidotransferase subunit B	K02434	640.2	1.1e-192	aspartyl-tR(Asn)/glutamyl-tR(Gln) amidotransferase subunit B [EC:6.3.5.6 6.3.5.7]	58.1242	48.8159	217.881	208.169	76.4057	61.7678	125.786	125.225	97.296	0.757418	0.327952	0.015208	0.0377804
Methanoperedens_03478	putative Thioredoxin	0	Thioredoxin	186.4	Thioredoxin	K03671	113.7	2.4e-33	thioredoxin 1	103.853	23.0668	289.281	378.795	26.2645	5.61525	32.1301	43.9099	26.9799	0.754813	0.658387	0.158652	0.255301
Methanoperedens_00946	Thermosome subunit alpha	0	Thermosome subunit beta	1011.9	Thermosome subunit	K22447	727.2	2.3e-219	archaeal chaperonin	248.659	171.354	869.241	776.311	372.478	247.071	571.847	531.798	430.799	0.754568	0.267223	0.00344324	0.0104587
Methanoperedens_02868	hypothetical protein	0	Sensor protein FixL	1132.5	PAS domain S-box	K13243	194.1	7.8e-58	c-di-GMP-specific phosphodiesterase [EC:3.1.4.52]	18.0873	18.413	67.3098	82.0323	28.6522	28.0763	46.8279	59.563	40.7798	0.752377	0.493203	0.0854325	0.156783
Methanoperedens_00749	hypothetical protein	0		353.2	RibD_C domain-containing protein					0	0	20.6351	35.2767	2.38768	0	6.49438	8.74133	4.40585	0.751057	1.07544	0.198054	0.302736
Methanoperedens_02581	Argininosuccite lyase	0	Argininosuccite lyase	942.2	Argininosuccite lyase	K01755	598.6	4.2e-180	argininosuccite lyase [EC:4.3.2.1]	38.6529	51.5112	187.844	152.079	52.5289	67.383	112.114	94.7316	81.6893	0.745832	0.377283	0.0330299	0.072584
Methanoperedens_02831	hypothetical protein	0	HTH-type transcriptiol regulator Ptr1	385.6	Transcriptiol regulator	K03718	92	5.9e-27	Lrp/AsnC family transcriptiol regulator, regulator for as, asnC and gidA	55.5668	52.216	207.598	231.835	31.0398	28.0763	50.9296	59.3597	42.3514	0.744222	0.469777	0.0779354	0.146135
Methanoperedens_00650	Type-2 serine--tR ligase	0	Type-2 serine--tR ligase	1065.4	Seryl-tR synthetase	K01875	52.1	7.7e-15	seryl-tR synthetase [EC:6.1.1.11]	93.6038	114.347	372.671	391.511	133.71	157.227	233.798	256.345	195.27	0.741348	0.262215	0.00334137	0.0101711
Methanoperedens_01443	S-adenosylmethionine synthase	0	S-adenosylmethionine synthase	791.2	S-adenosylmethionine synthase	K00789	42.8	6.8e-12	S-adenosylmethionine synthetase [EC:2.5.1.6]	245.471	257.782	995.961	875.517	272.195	275.147	485.028	444.588	369.24	0.74098	0.207116	0.000254869	0.00105249
Methanoperedens_02173	hypothetical protein	0		369	Uncharacterized protein					4.52184	0	39.7963	28.5573	2.38768	0	9.22886	6.0986	4.42878	0.739781	1.07482	0.200991	0.306565
Methanoperedens_03257	Acetyltransferase YpeA	0		335.9	Putative acetyltransferase	K06718	102.8	3.1e-30	L-2,4-diaminobutyric acid acetyltransferase [EC:2.3.1.178]	0	0	27.4894	33.2877	0	0	5.46895	6.30189	2.94271	0.73903	1.25648	0.128392	0.217462
Methanoperedens_01055	hypothetical protein	0		149.8	Uncharacterized protein					0	0	61.8288	60.1034	0	0	5.81076	5.89531	2.92652	0.737656	1.25484	0.129164	0.218378
Methanoperedens_01521	Phosphoribosyl-AMP cyclohydrolase	0	Phosphoribosyl-AMP cyclohydrolase	252.7	Phosphoribosyl-AMP cyclohydrolase	K01496	210.5	8.3e-63	phosphoribosyl-AMP cyclohydrolase [EC:3.5.4.19]	0	0	39.0231	37.9341	0	0	5.81076	5.89531	2.92652	0.737656	1.25484	0.129164	0.218378
Methanoperedens_03341	hypothetical protein	0		681.4	R cap guanine-N2 methyltransferase	K14292	108.1	1.1e-31	trimethylguanosine synthase [EC:2.1.1.-]	7.62558	24.8412	62.1409	66.1003	7.16304	22.461	25.6357	28.4601	20.93	0.736902	0.695326	0.16767	0.267387
Methanoperedens_02477	Regulator of RpoS	0	Transcriptiol regulatory protein ZraR	400.2	Response regulator	K02490	132.6	2.1e-39	two-component system, response regulator, stage 0 sporulation protein F	0	9.90134	35.6665	30.8631	0	5.61525	9.22886	8.33476	5.79472	0.736611	1.0651	0.172694	0.274011
Methanoperedens_01546	hypothetical protein	0		138.3	Uncharacterized protein					39.9604	73.2238	192.126	270.923	9.55072	16.8458	20.1668	31.916	19.6198	0.73479	0.704563	0.175525	0.276954
Methanoperedens_02592	hypothetical protein	0		444.9	CRISPR-associated protein Cas5	K19116	133.9	1.6e-39	CRISPR-associated protein Cas5h	19.5261	38.1652	106.928	119.689	11.9384	22.461	28.712	33.5423	24.1634	0.731355	0.615754	0.147453	0.241875
Methanoperedens_02095	hypothetical protein	0		176.8	Uncharacterized protein					9.65336	0	59.7856	73.5167	2.38768	0	6.49438	8.33476	4.3042	0.73016	1.06502	0.20684	0.3138
Methanoperedens_01697	hypothetical protein	0		626.7	Transposase family protein	K07495	128.7	5.4e-38	putative transposase	10.8478	26.5036	31.1165	47.9561	11.9384	16.8458	17.7741	44.1132	22.6679	0.7297	0.758573	0.189908	0.293607
Methanoperedens_01778	Type-1 restriction enzyme MjaXIP specificity protein	0	Uncharacterized protein MJ1531	884.4	Restriction endonuclease S subunit	K01154	142.7	3.1e-42	type I restriction enzyme, S subunit [EC:3.1.21.3]	5.87118	9.56302	38.2754	30.8991	7.16304	11.2305	20.5086	17.2794	14.0454	0.726845	0.734846	0.192965	0.297199
Methanoperedens_00960	hypothetical protein	0								125.293	0	437.575	362.391	16.7138	0	25.6357	22.1583	16.1269	0.726309	0.785282	0.210958	0.318175
Methanoperedens_01045	hypothetical protein	0		184.9	MarR family regulator	K07725	39.7	7.2e-11	CRISPR-associated protein Csa3	9.23816	0	66.248	60.0588	2.38768	0	7.51981	7.11503	4.25563	0.726205	1.0594	0.209546	0.31672
Methanoperedens_00883	hypothetical protein	0		346.7	Uncharacterized protein					5.30339	0	31.1165	42.359	2.38768	0	6.15257	8.74133	4.32039	0.724994	1.06655	0.207878	0.314701
Methanoperedens_01171	[LysW]-L-2-aminoadipate/[LysW]-L-glutamate phosphate reductase	0	N-acetyl-gamma-glutamyl-phosphate reductase	667.2	N-acetyl-gamma-glutamyl-phosphate reductase	K00145	421.9	5.7e-127	N-acetyl-gamma-glutamyl-phosphate reductase [EC:1.2.1.38]	61.1857	56.0586	234.343	220.672	57.3043	50.5373	96.3903	94.7316	74.7409	0.72467	0.360141	0.0323399	0.0714296
Methanoperedens_00468	Thymidylate synthase	0		525.8	Uncharacterized protein	K22882	310.9	1.3e-93	thymidylate synthase [EC:2.1.1.-]	10.0682	32.7982	99.5484	72.3119	7.16304	22.461	31.1047	23.5813	21.0775	0.723743	0.709031	0.177859	0.27986
Methanoperedens_01087	hypothetical protein	0		236.9	Putative transcriptiol regulator	K02565	26.6	4.9e-07	N-acetylglucosamine repressor	6.81864	0	55.5651	39.263	2.38768	0	8.54524	6.30189	4.3087	0.723657	1.0635	0.208945	0.31598
Methanoperedens_01963	2-methoxy-6-polyprenyl-1,4-benzoquinol methylase, mitochondrial	0	Demethylmequinone methyltransferase	441.8	Methylase involved in ubiquinone/mequinone biosynthesis	K03183	118.7	6.4e-35	demethylmequinone methyltransferase / 2-methoxy-6-polyprenyl-1,4-benzoquinol methylase [EC:2.1.1.163 2.1.1.201]	19.7961	19.3464	101.953	91.9268	11.9384	11.2305	27.0029	21.1418	17.8284	0.72306	0.667456	0.176539	0.277936
Methanoperedens_03203	hypothetical protein	0		236.9	Uncharacterized protein					0	0	34.4322	41.8583	0	0	5.12714	6.50517	2.90808	0.722164	1.24526	0.133052	0.222959
Methanoperedens_01563	D-inositol-3-phosphate glycosyltransferase	0	Spore coat protein SA	677.9	Glycosyltransferase	K00754	200.8	9.8e-60	L-malate glycosyltransferase [EC:2.4.1.-]	0	0	14.2114	13.3384	0	0	5.81076	5.69203	2.8757	0.721931	1.24361	0.134168	0.22443
Methanoperedens_02694	hypothetical protein	0		166.4	Uncharacterized protein	K03970	24.8	3.3e-06	phage shock protein B	122.736	187.418	527.591	612.692	38.2029	56.1525	72.1218	87.4133	63.4726	0.721496	0.426576	0.0621902	0.122015
Methanoperedens_02300	hypothetical protein	0		302	Putative nucleic acid-binding protein, contains PIN domain	K07066	147.4	6.4e-44	uncharacterized protein	5.5429	0	34.3285	41.1832	2.38768	0	6.49438	8.13147	4.25338	0.719411	1.05987	0.211513	0.318336
Methanoperedens_00426	hypothetical protein	0		376.3	Uncharacterized protein					0	0	13.624	52.6199	0	0	3.07629	12.4005	3.86919	0.71923	1.2756	0.10948	0.190901
Methanoperedens_00767	Amidophosphoribosyltransferase	0	Uncharacterized protein TM_0398	771.5	Glutamate synthase family protein	K22081	96.9	2.8e-28	methylamine---glutamate N-methyltransferase subunit A [EC:2.1.1.21]	0	0	14.9758	10.2407	0	0	6.83619	4.87888	2.92877	0.719225	1.24399	0.133231	0.223126
Methanoperedens_00354	ADP-ribose pyrophosphatase	0	ADP-ribose pyrophosphatase	305.1	ADP-ribose pyrophosphatase	K03574	78	1.6e-22	8-oxo-dGTP diphosphatase [EC:3.6.1.55]	0	0	35.4728	27.6614	0	0	6.49438	5.08217	2.89414	0.717482	1.24165	0.134658	0.224986
Methanoperedens_01875	hypothetical protein	0		315.8	Uncharacterized protein					122.736	149.935	514.634	493.263	52.5289	61.7678	96.7321	96.7645	76.9483	0.716967	0.359407	0.0331017	0.0726853
Methanoperedens_03271	hypothetical protein	0		59.7	Uncharacterized protein					47.7305	0	178.92	161.801	9.55072	0	15.7232	14.8399	10.0285	0.71683	0.842474	0.227892	0.338497
Methanoperedens_01940	Poly(3-hydroxyalkanoate) polymerase subunit PhaC	0	Poly(3-hydroxyalkanoate) polymerase subunit PhaC	765	PHB synthase subunit PhaC	K03821	350.9	3.7e-105	polyhydroxyalkanoate synthase subunit PhaC [EC:2.3.1.-]	2.26092	5.5239	25.057	20.5781	2.38768	5.61525	11.6215	9.1479	7.19309	0.714641	0.927593	0.225702	0.335948
Methanoperedens_03366	hypothetical protein	0		229.2	Robl_LC7 domain-containing protein	K07131	95.2	7.6e-28	uncharacterized protein	41.9097	17.0657	129.778	175.154	14.3261	5.61525	19.4831	27.4437	16.717	0.71385	0.705713	0.197141	0.301829
Methanoperedens_00222	D repair and recombition protein RadA	0	D repair and recombition protein RadA	637.1	D repair and recombition protein RadA	K04483	558	2.9e-168	D repair protein RadA	245.471	293.622	926.826	1014.5	229.217	263.917	380.092	434.017	326.811	0.713127	0.232911	0.00160309	0.00539497
Methanoperedens_03037	hypothetical protein	0	Uncharacterized protein YeaC	605.5	MoxR-like ATPase	K03924	414.8	7.7e-125	MoxR-like ATPase [EC:3.6.3.-]	24.4694	0	62.036	89.3878	21.4891	0	23.9267	35.9817	20.3494	0.71281	0.805587	0.219362	0.328754
Methanoperedens_02432	hypothetical protein	0		528.9	CRISPR_Cas6 domain-containing protein					0	0	12.8266	24.9732	0	0	4.10171	8.33476	3.10912	0.712166	1.24729	0.129249	0.218391
Methanoperedens_01884	Urocate hydratase	0	Urocate hydratase	1138.6	Probable urocate hydratase	K01712	838.8	6.3e-253	urocate hydratase [EC:4.2.1.49]	12.2299	18.6751	60.7934	58.2116	19.1014	28.0763	41.7008	40.6573	32.384	0.711202	0.524225	0.118133	0.202871
Methanoperedens_01049	hypothetical protein	0		129.8	Putative subunit of the multisubunit +/H+ antiporter	K14113	76.6	2.6e-22	energy-converting hydrogese B subunit D	20.7024	0	111.344	80.7538	4.77536	0	11.2797	8.53804	6.14828	0.709885	0.957899	0.237843	0.349442
Methanoperedens_00436	tR-guanine(15) transglycosylase	0	Queuine tR-ribosyltransferase	748	Queuine tR-ribosyltransferase	K00773	518.9	2.3e-156	queuine tR-ribosyltransferase [EC:2.4.2.29]	7.0422	17.2056	42.8489	59.2993	7.16304	16.8458	19.1413	26.224	17.3435	0.709556	0.721094	0.193352	0.297472
Methanoperedens_00918	hypothetical protein	0	Iron-sulfur flavoprotein AF_1896	473.4	DPH-dependent FMN reductase	K03206	48.9	1.2e-13	azobenzene reductase [EC:1.7.1.6]	14.5004	44.2845	82.7147	161.605	9.55072	28.0763	23.9267	48.7888	27.5856	0.708901	0.735426	0.1907	0.29467
Methanoperedens_03165	hypothetical protein	0	UPF0288 protein MA_3997	1017.3	UPF0288 protein ANME2D_01119					102.077	87.2886	380.422	333.39	143.261	117.92	234.481	214.671	177.583	0.708847	0.268718	0.00639026	0.0179654
Methanoperedens_01570	UDP-4-amino-4-deoxy-L-arabinose--oxoglutarate aminotransferase	0	Pleiotropic regulatory protein	302.8	Putative PLP-dependent enzyme possibly involved in cell wall biogenesis	K13017	107.6	1.4e-31	UDP-2-acetamido-2-deoxy-ribo-hexulurote aminotransferase [EC:2.6.1.98]	30.0402	29.3578	137.087	126.106	11.9384	11.2305	23.9267	22.9714	17.5167	0.707179	0.651969	0.181094	0.283065
Methanoperedens_01599	hypothetical protein	0	Uncharacterized glycosyltransferase RF_0543	640.6	Putative glycosyltransferase	K12988	199.9	1.6e-59	alpha-1,3-rhamnosyltransferase [EC:2.4.1.-]	2.68484	6.55964	23.6291	26.93	2.38768	5.61525	9.22886	11.1808	7.10314	0.704814	0.923498	0.230923	0.342103
Methanoperedens_03206	hypothetical protein	0	Multifunctiol non-homologous end joining protein LigD	309.3	D ligase D-like 3'-phosphoesterase domain-containing protein	K01971	174	1e-51	bifunctiol non-homologous end joining protein LigD [EC:6.5.1.1]	0	0	24.2709	38.3004	0	0	4.44352	7.31832	2.94046	0.701633	1.23484	0.136656	0.227519
Methanoperedens_02712	Acylphosphatase	0	Probable carbamoyltransferase HypF	1430.6	Carbamoyltransferase	K04656	880.6	1.8e-265	hydrogese maturation protein HypF	2.25795	0	11.04	9.43669	4.77536	0	10.2543	9.1479	6.04439	0.701077	0.949462	0.243175	0.35525
Methanoperedens_00072	hypothetical protein	0		102.1	Uncharacterized protein					8.9031	0	33.3736	52.0925	4.77536	0	7.51981	12.6038	6.22474	0.700234	0.971937	0.239816	0.351788
Methanoperedens_02073	Sensor histidine kise RcsC	0	Sensor kise CckA	594	PAS domain S-box	K13587	404.1	1.8e-121	two-component system, cell cycle sensor histidine kise and response regulator CckA [EC:2.7.13.3]	2.83547	0	13.8638	16.3272	0	0	5.46895	5.69203	2.79024	0.695611	1.22539	0.143073	0.235772
Methanoperedens_02034	Cell division protein FtsZ 1	0	Cell division protein FtsZ 2	726.9	Cell division protein FtsZ	K03531	415.4	5.6e-125	cell division protein FtsZ	479.315	336.958	1650.81	1389.65	506.188	342.53	765.653	672.676	571.762	0.695519	0.266019	0.00683672	0.0190341
Methanoperedens_00409	hypothetical protein	0		233.4	Putative transcriptiol regulator	K07721	24.9	2.7e-06	ArsR family transcriptiol regulator	0	0	28.0048	51.8651	0	0	4.10171	7.92818	3.00747	0.694449	1.23317	0.136215	0.226947
Methanoperedens_02005	hypothetical protein	0		558.1	Uncharacterized protein					9.4412	0	30.7745	41.5038	7.16304	0	10.2543	14.4334	7.96267	0.683948	0.894649	0.249835	0.362364
Methanoperedens_00095	D-inositol-3-phosphate glycosyltransferase	0	Putative glycosyltransferase EpsF	727.6	Glycosyltransferase	K00754	245.1	3.6e-73	L-malate glycosyltransferase [EC:2.4.1.-]	0	5.6732	20.436	15.9585	0	5.61525	9.22886	7.52161	5.59143	0.683465	1.04496	0.191877	0.295845
Methanoperedens_01525	Universal stress protein	0	Universal stress protein MJ0531	288.1	Universal stress protein UspA-like protein	K06149	95.7	6.1e-28	universal stress protein A	11.3795	27.8024	92.7312	112.027	4.77536	11.2305	17.0905	14.6366	11.9332	0.682469	0.783218	0.226534	0.336833
Methanoperedens_02620	Isopentenyl phosphate kise	0	Isopentenyl phosphate kise	485.7	Isopentenyl phosphate kise	K06981	217.7	5.3e-65	isopentenyl phosphate kise [EC:2.7.4.26]	37.0613	16.4634	107.626	133.926	26.2645	11.2305	33.4973	43.3001	28.5731	0.681255	0.579318	0.16739	0.267138
Methanoperedens_03396	hypothetical protein	0		344.7	Putative integral membrane protein	K20950	53.1	6.3e-15	polysaccharide biosynthesis protein VpsQ	0	0	24.352	23.4174	0	0	5.46895	5.48874	2.73942	0.680341	1.21506	0.148666	0.243651
Methanoperedens_02604	hypothetical protein	0		722.6	Uncharacterized protein					0	0	7.73614	20.7196	0	0	3.41809	9.55448	3.24314	0.679231	1.23204	0.132842	0.22287
Methanoperedens_02879	hypothetical protein	0		623.2	Transposase family protein	K07495	124.6	9.6e-37	putative transposase	34.7131	21.2029	113.858	118.077	35.8152	22.461	55.0313	53.2611	41.6422	0.676959	0.464705	0.107137	0.188087
Methanoperedens_02185	hypothetical protein	0		260.8	Putative transcriptiol regulator	K04767	81.8	8.7e-24	acetoin utilization protein AcuB	19.0922	15.5488	114.094	74.473	7.16304	5.61525	18.7995	11.7906	10.8421	0.674623	0.805494	0.240722	0.352935
Methanoperedens_01116	Thermosome subunit alpha	0	Thermosome subunit alpha	1025.8	Thermosome subunit	K22447	732.2	7.2e-221	archaeal chaperonin	12.5652	7.67489	42.4936	46.3876	19.1014	11.2305	28.3702	32.3226	22.7562	0.672513	0.59191	0.17855	0.280479
Methanoperedens_01156	hypothetical protein	0	50S ribosomal protein L18Ae	117.9	50S ribosomal protein L18Ae	K02944	70.9	1.2e-20	large subunit ribosomal protein LX	14.3191	0	93.3494	90.4315	2.38768	0	6.83619	6.91175	4.0339	0.671998	1.03791	0.233733	0.345185
Methanoperedens_00948	hypothetical protein	0		407.5	Uncharacterized protein	K05588	195.8	1.3e-58	bidirectiol [NiFe] hydrogese diaphorase subunit [EC:7.1.1.2]	32.6259	26.5707	111.074	131.977	21.4891	16.8458	32.1301	39.8442	27.5773	0.669784	0.555562	0.160802	0.257883
Methanoperedens_02178	hypothetical protein	0		659.1	Uncharacterized protein					0	0	12.6528	20.1885	0	0	5.12714	5.69203	2.70479	0.668454	1.20746	0.152999	0.24846
Methanoperedens_00718	Orotate phosphoribosyltransferase	0	PyrE-like protein	408.7	PyrE-like protein	K00762	102.9	4e-30	orotate phosphoribosyltransferase [EC:2.4.2.10]	164.43	130.565	521.238	577.255	95.5072	72.9983	132.964	153.888	113.839	0.665962	0.326102	0.0319493	0.070717
Methanoperedens_03036	hypothetical protein	0		901	DUF58 domain-containing protein					7.34315	17.9409	40.6908	55.2409	9.55072	22.461	23.243	32.9324	22.0468	0.665945	0.669999	0.203071	0.308907
Methanoperedens_00185	Type-1 restriction enzyme MjaXIP specificity protein	0	Putative type I restriction enzyme specificity protein HI_0216	851.3	Restriction endonuclease S subunit	K01154	155.2	5.1e-46	type I restriction enzyme, S subunit [EC:3.1.21.3]	32.6517	34.9016	123.727	125.848	38.2029	39.3068	63.5766	67.4912	52.1443	0.665381	0.416103	0.0815956	0.150904
Methanoperedens_02813	Argininosuccite lyase	0	Adenylosuccite lyase	869.8	Adenylosuccite lyase	K01756	437.6	1.8e-131	adenylosuccite lyase [EC:4.3.2.2]	159.886	202.378	624.771	622.954	198.177	241.456	340.1	353.719	283.363	0.660904	0.22958	0.00301658	0.00935306
Methanoperedens_01351	Trehalose/maltose import ATP-binding protein MalK	0	Probable multidrug ABC transporter ATP-binding protein YbhF	276.6	ABC transporter domain-containing protein	K01990	158.8	4.4e-47	ABC-2 type transport system ATP-binding protein	6.09325	0	33.7647	44.1405	2.38768	0	5.81076	7.92818	4.03166	0.659503	1.03841	0.237969	0.349442
Methanoperedens_02833	hypothetical protein	0		310.8	Uncharacterized protein					5.11398	0	28.3382	37.0465	2.38768	0	5.81076	7.92818	4.03166	0.659503	1.03841	0.237969	0.349442
Methanoperedens_01981	hypothetical protein	0		145.6	Putative transcriptiol regulator	K22298	67.7	2.6e-19	ArsR family transcriptiol regulator, zinc-responsive transcriptiol repressor	0	0	30.0878	42.2043	0	0	4.44352	6.50517	2.73717	0.659155	1.2039	0.15424	0.250188
Methanoperedens_00813	putative methanogenesis regulatory protein FilR2	0	Probable methanogenesis regulatory protein FilR2	293.5	Response regulator with CheY-like receiver domain and winged-helix D-binding domain	K11355	142.5	1.3e-42	two-component system, chemotaxis family, response regulator Rcp1	45.5178	27.8024	152.079	165.926	19.1014	11.2305	28.0284	31.916	22.5691	0.657367	0.591329	0.187981	0.291103
Methanoperedens_00007	hypothetical protein	0		359	Uncharacterized protein					0	0	24.9258	21.7236	0	0	5.81076	4.87888	2.67241	0.656385	1.19977	0.157601	0.253898
Methanoperedens_00670	hypothetical protein	0		411.4	ABC transporter permease					17.0128	0	40.6671	67.4154	14.3261	0	15.0396	26.0207	13.8466	0.655568	0.834313	0.25877	0.372463
Methanoperedens_01558	hypothetical protein	0		160.6	Uncharacterized protein					0	0	50.0086	51.2952	0	0	5.12714	5.48874	2.65397	0.654493	1.19827	0.158761	0.255332
Methanoperedens_02308	hypothetical protein	0		334.3	S-layer domain-containing protein					9.87527	24.1274	70.8168	71.5381	4.77536	11.2305	15.0396	15.6531	11.6746	0.653707	0.775788	0.243541	0.355597
Methanoperedens_03174	Ribose-5-phosphate isomerase A	0	Ribose-5-phosphate isomerase A	448	Ribose-5-phosphate isomerase A	K01807	296.8	5.3e-89	ribose 5-phosphate isomerase A [EC:5.3.1.6]	3.75174	27.4989	85.6043	82.2315	2.38768	16.8458	23.9267	14.6366	14.4492	0.653232	0.858072	0.237412	0.349442
Methanoperedens_03107	Acylphosphatase	0	Acylphosphatase	236.9	Acylphosphatase	K01512	77.7	2.4e-22	acylphosphatase [EC:3.6.1.7]	27.3366	9.54129	82.7415	98.6525	16.7138	5.61525	22.2176	26.8338	17.8451	0.651983	0.6649	0.223728	0.334061
Methanoperedens_00600	Sigl recognition particle 54 kDa protein	0	Sigl recognition particle 54 kDa protein	837.8	Sigl recognition particle 54 kDa protein	K03106	552.4	2.3e-166	sigl recognition particle subunit SRP54 [EC:3.6.5.4]	107.394	95.4129	355.152	374.299	131.322	112.305	190.73	209.792	161.037	0.651791	0.274181	0.013828	0.034871
Methanoperedens_02923	2-methoxy-6-polyprenyl-1,4-benzoquinol methylase, mitochondrial	0	Ubiquinone/mequinone biosynthesis C-methyltransferase UbiE	435.6	Demethylmequinone methyltransferase	K03183	276.6	7.1e-83	demethylmequinone methyltransferase / 2-methoxy-6-polyprenyl-1,4-benzoquinol methylase [EC:2.1.1.163 2.1.1.201]	11.7692	0	51.1504	36.4349	7.16304	0	13.6724	10.1643	7.74994	0.649979	0.883221	0.269088	0.383812
Methanoperedens_02539	hypothetical protein	0		95.5	Uncharacterized protein					0	0	34.6726	30.3971	0	0	5.46895	5.08217	2.63778	0.649742	1.19515	0.160787	0.257883
Methanoperedens_01472	GMP synthase [glutamine-hydrolyzing] subunit B	0	GMP synthase [glutamine-hydrolyzing] subunit B	602.8	GMP synthase [glutamine-hydrolyzing] subunit B	K01951	369.7	4.7e-111	GMP synthase (glutamine-hydrolysing) [EC:6.3.5.2]	14.0844	27.529	74.3735	81.1005	11.9384	22.461	27.6866	30.2897	23.0939	0.64737	0.606914	0.194159	0.298552
Methanoperedens_02424	hypothetical protein	0		507.7	CRISPR-associated protein, Csx7 family	K09002	143.7	1.5e-42	CRISPR-associated protein Csm3	3.4229	8.36288	33.4719	27.975	2.38768	5.61525	10.2543	8.94462	6.80046	0.646447	0.906511	0.262003	0.376165
Methanoperedens_00591	hypothetical protein	0	Uncharacterized protein MJ0988	615.9	Exopolyphosphatase-like enzyme	K06881	160.6	1.3e-47	bifunctiol oligoribonuclease and PAP phosphatase Nr [EC:3.1.3.7 3.1.13.3]	147.206	137.323	538.286	516.041	131.322	117.92	210.896	194.749	163.722	0.645321	0.267481	0.0125604	0.0322479
Methanoperedens_00142	hypothetical protein	0		366.3	Uncharacterized protein	K21573	23.3	3.4e-06	TonB-dependent starch-binding outer membrane protein SusC	18.2798	11.1653	61.0744	84.0367	9.55072	5.61525	14.0142	20.1254	12.3264	0.644732	0.751913	0.252065	0.364851
Methanoperedens_02181	hypothetical protein	0	UPF0179 protein Mthe_0220	321.6	UPF0179 protein ANME2D_00682	K09730	164.9	1.9e-49	uncharacterized protein	89.2622	68.1521	292.778	312.952	38.2029	28.0763	55.0313	61.3926	45.6758	0.642061	0.444781	0.112758	0.195773
Methanoperedens_02087	Orotate phosphoribosyltransferase	0	Orotate phosphoribosyltransferase	349.7	Orotate phosphoribosyltransferase	K00762	167.7	8.2e-50	orotate phosphoribosyltransferase [EC:2.4.2.10]	8.22152	10.0435	45.5581	45.0503	4.77536	5.61525	11.6215	11.9939	8.50151	0.640834	0.826079	0.26594	0.380278
Methanoperedens_00780	hypothetical protein	0		424.5	Putative D binding protein	K23348	70.5	2.9e-20	HTH-type transcriptiol regulator, dimethyl sulfoxide reductase transcription regulator	0	0	26.5449	21.1771	0	0	6.83619	4.06573	2.72548	0.640452	1.19323	0.160186	0.257186
Methanoperedens_03043	hypothetical protein	0		1632.8	Uncharacterized protein	K09607	87.5	1.9e-25	immune inhibitor A [EC:3.4.24.-]	2.12661	10.3915	25.9946	21.3307	4.77536	22.461	25.6357	21.955	18.7068	0.640018	0.749044	0.235817	0.347719
Methanoperedens_01219	hypothetical protein	0		2238.4	Putative membrane protein	K20950	46.7	5.6e-13	polysaccharide biosynthesis protein VpsQ	8.3339	0	25.1895	22.5164	26.2645	0	34.8646	30.8996	23.0072	0.639805	0.770947	0.258899	0.372463
Methanoperedens_00232	Crotonobetainyl-CoA reductase	0	Probable acyl-CoA dehydrogese YngJ	773.5	Acyl-CoA dehydrogese	K00249	354.2	3.1e-106	acyl-CoA dehydrogese [EC:1.3.8.7]	2.2143	0	15.1573	20.5651	2.38768	0	7.178	6.0986	3.91607	0.638798	1.02648	0.24979	0.362364
Methanoperedens_00021	hypothetical protein	0	AP-4-A phosphorylase	280.4	HIT family hydrolase, diadenosine tetraphosphate hydrolase	K19710	117.6	1.3e-34	ATP adenylyltransferase [EC:2.7.7.53]	6.60884	0	40.9301	40.51	2.38768	0	6.49438	6.70846	3.89763	0.638585	1.02535	0.250403	0.363001
Methanoperedens_00356	Methenyltetrahydromethanopterin cyclohydrolase	0	Methenyltetrahydromethanopterin cyclohydrolase	614.8	Methenyltetrahydromethanopterin cyclohydrolase	K01499	429.6	1.4e-129	methenyltetrahydromethanopterin cyclohydrolase [EC:3.5.4.27]	219.653	373.623	1187.26	1117.09	188.627	308.839	447.77	340.505	321.435	0.632857	0.342826	0.0477372	0.0982431
Methanoperedens_03362	DPH dehydrogese	0	DH oxidase	715.7	DH:flavin oxidoreductase	K21833	313.2	6.7e-94	dimethylglycine catabolism A	198.082	233.231	693.897	773.987	198.177	224.61	304.894	354.939	270.655	0.62951	0.246198	0.00824718	0.0224757
Methanoperedens_03402	hypothetical protein	0		364	Ferredoxin-thioredoxin reductase subunit B	K17892	114	1.6e-33	ferredoxin-thioredoxin reductase catalytic chain [EC:1.8.7.2]	104.774	76.7957	312.493	375.608	47.7536	33.6915	62.5511	78.4687	55.6162	0.628496	0.434044	0.1132	0.196182
Methanoperedens_01885	Formimidoylglutamase	0	Formimidoylglutamase	558.5	Argise family hydrolase, argise/agmaise/formiminoglutamate hydrolase	K01479	270.7	3.6e-81	formiminoglutamase [EC:3.5.3.8]	2.66816	0	21.7429	12.3901	2.38768	0	8.54524	5.08217	4.00377	0.628378	1.03325	0.25072	0.363274
Methanoperedens_02734	hypothetical protein	0		639.8	Cytochrome c biogenesis protein	K06196	127.4	1.4e-37	cytochrome c-type biogenesis protein	7.36413	29.9869	70.4121	79.7925	7.16304	28.0763	30.0792	28.4601	23.4447	0.628033	0.688424	0.229396	0.340019
Methanoperedens_00599	Cell division protein FtsZ 1	0	Cell division protein FtsZ 2	705.7	Cell division protein FtsZ	K03531	350.3	3.2e-105	cell division protein FtsZ	120.885	110.756	413.036	401.368	133.71	117.92	200.642	203.49	163.941	0.62633	0.26117	0.0133317	0.0337697
Methanoperedens_02717	hypothetical protein	0	Molybdenum transport protein ModE	344.7	Molybdenum-pterin binding domain	K02019	151.1	8.1e-45	molybdate transport system regulatory protein	4.7206	11.5334	47.7005	35.9505	2.38768	5.61525	10.5961	8.33476	6.73345	0.625513	0.904509	0.27341	0.388999
Methanoperedens_02961	hypothetical protein	0	Putative sigl peptide peptidase SppA	577.8	Sigl peptide peptidase A	K04773	295.4	1.6e-88	protease IV [EC:3.4.21.-]	56.8973	76.4567	244.81	258.401	47.7536	61.7678	90.2377	82.1278	70.4717	0.624961	0.378583	0.0750116	0.141967
Methanoperedens_01003	hypothetical protein	0		91.7	Uncharacterized protein					0	0	74.9425	44.9535	0	0	6.49438	4.06573	2.64003	0.62388	1.18198	0.168477	0.268372
Methanoperedens_00748	hypothetical protein	0		241.1	Translation initiation inhibitor	K09022	79.1	7.2e-23	2-iminobutanoate/2-iminopropanoate deamise [EC:3.5.99.10]	0	0	44.0076	19.3782	0	0	7.86162	3.45587	2.82937	0.623013	1.18743	0.161429	0.258743
Methanoperedens_02030	hypothetical protein	0		123.6	Uncharacterized protein					0	0	80.6919	59.5062	0	0	5.81076	4.47231	2.57077	0.622776	1.17918	0.171637	0.27264
Methanoperedens_03078	hypothetical protein	0		386.7	Uncharacterized protein					8.26105	10.0917	30.9669	65.9822	4.77536	5.61525	7.86162	17.4827	8.93372	0.622523	0.879012	0.27397	0.389405
Methanoperedens_02206	hypothetical protein	0		911	Uncharacterized protein	K01154	55.7	8.7e-16	type I restriction enzyme, S subunit [EC:3.1.21.3]	5.49562	8.95131	33.4386	25.8602	7.16304	11.2305	19.1413	15.4498	13.2462	0.621558	0.726339	0.256691	0.370037
Methanoperedens_00311	hypothetical protein	0		515	acVLRF1 domain-containing protein	K03265	39.4	5.3e-11	peptide chain release factor subunit 1	0	6.68498	18.7293	20.8375	0	5.61525	7.178	8.33476	5.282	0.621496	1.01996	0.219743	0.329151
Methanoperedens_01303	hypothetical protein	0	Uncharacterized protein AF_2058	708	Putative membrane protein	K08975	409.3	3.4e-123	putative membrane protein	58.685	40.1464	174.456	203.623	59.692	39.3068	77.9326	91.6823	67.1534	0.620552	0.399478	0.0943847	0.170512
Methanoperedens_00288	F(420)H(2) dehydrogese subunit M	0	Hydrogese-4 component F	907.9	Formate hydrogenlyase subunit 3/multisubunit +/H+ antiporter, MnhD subunit	K12141	595.5	1.6e-179	hydrogese-4 component F [EC:1.-.-.-]	1.77144	0	11.5484	16.7811	2.38768	0	6.83619	6.0986	3.83062	0.620097	1.01897	0.260059	0.373942
Methanoperedens_00799	hypothetical protein	0		282.3	Uncharacterized protein					118.289	121.686	413.984	441.75	45.3659	44.922	69.7291	77.4522	59.3673	0.619625	0.395258	0.0904818	0.164444
Methanoperedens_00786	Segregation and condensation protein A	0		436.4	Uncharacterized protein	K05896	132.8	3.2e-39	segregation and condensation protein A	7.40646	0	25.3492	37.1448	4.77536	0	7.178	10.9775	5.73271	0.619218	0.941423	0.284717	0.401663
Methanoperedens_03008	hypothetical protein	0		698.7	FemAB family	K11693	102.1	6.4e-30	peptidoglycan pentaglycine glycine transferase (the first glycine) [EC:2.3.2.16]	0	0	13.3754	10.9566	0	0	5.46895	4.67559	2.53614	0.618338	1.17588	0.174488	0.276086
Methanoperedens_01130	hypothetical protein	0		588.6	Ethylbenzene dehydrogese	K17049	61.2	1.8e-17	ethylbenzene hydroxylase subunit gamma	787.304	724.074	2468.72	2705.16	627.96	555.91	865.12	988.177	759.292	0.617874	0.193256	0.00114755	0.00401927
Methanoperedens_01681	hypothetical protein	0		335.1	Uncharacterized protein					15.8126	12.8778	82.4682	67.5544	7.16304	5.61525	16.4069	11.9939	10.2948	0.617626	0.781096	0.275482	0.391154
Methanoperedens_03340	hypothetical protein	0		505.8	Uncharacterized protein					39.2007	39.9065	148.01	142.595	28.6522	28.0763	47.5115	47.5691	37.9523	0.616985	0.467158	0.141338	0.233669
Methanoperedens_01226	hypothetical protein	0	Putative flagella-related protein D	495	Putative archaeal flagellar protein D/E	K07327	205.8	3.1e-61	archaeal flagellar protein FlaD	62.9236	53.2162	217.728	202.74	62.0797	50.5373	94.3394	91.6823	74.6597	0.616716	0.35657	0.0663778	0.128192
Methanoperedens_00161	hypothetical protein	0	Uncharacterized protein MJ1432	320.1	PUA-domain protein	K15027	87.5	1.7e-25	translation initiation factor 2D	0	0	24.352	25.7715	0	0	4.78533	5.28545	2.5177	0.614828	1.17369	0.176329	0.277759
Methanoperedens_00817	hypothetical protein	0		221.9	Uncharacterized protein	K02485	23.1	9.8e-06	two-component system, response regulator	7.95508	0	57.0469	39.8962	2.38768	0	7.51981	5.48874	3.84906	0.613289	1.02027	0.262205	0.376265
Methanoperedens_00221	hypothetical protein	0		68.6	Uncharacterized protein					0	0	76.876	51.6304	0	0	9.57067	2.84601	3.10417	0.613092	1.18977	0.15473	0.25078
Methanoperedens_00900	F(420)H(2) dehydrogese subunit F	0	F(420)H(2) dehydrogese subunit F	926.8	Coenzyme F420-reducing hydrogese, beta subunit	K22162	268.6	1.5e-80	F420H2 dehydrogese subunit F [EC:1.5.7.2 1.5.98.3]	376.116	461.798	1443.18	1350.44	470.373	555.91	792.656	774.319	648.315	0.612277	0.184368	0.000706673	0.00260915
Methanoperedens_01347	Tol-Pal system protein TolB	0		1064.7	Periplasmic component of the Tol biopolymer transport system	K03641	113.8	2.4e-33	TolB protein	9.5765	6.68498	33.8912	33.2892	16.7138	11.2305	25.9775	26.8338	20.1889	0.61195	0.60086	0.224041	0.334352
Methanoperedens_00421	hypothetical protein	0		136	Putative periplasmic or secreted lipoprotein	K07339	44.5	2.8e-12	mR interferase HicA [EC:3.1.-.-]	0	0	62.6974	57.1648	0	0	5.12714	4.87888	2.50151	0.611202	1.17132	0.178281	0.280213
Methanoperedens_02802	Circadian clock protein KaiB	0	KaiB-like protein 1	211.5	KaiB domain-containing protein	K08481	137.1	4.3e-41	circadian clock protein KaiB	7.95508	0	54.4538	62.0608	2.38768	0	7.178	5.69203	3.81443	0.610818	1.01739	0.264466	0.378553
Methanoperedens_02797	hypothetical protein	0		716.5	Uncharacterized protein	K23499	27.4	3e-07	required for meiotic nuclear division protein 1	4.61908	5.6427	29.3599	32.6034	4.77536	5.61525	13.3306	9.96105	8.42056	0.60938	0.829851	0.285513	0.402585
Methanoperedens_00376	hypothetical protein	0		1263.4	PMT family glycosyltransferase, 4-amino-4-deoxy-L-arabinose transferase	K00728	78.8	6.4e-23	dolichyl-phosphate-mannose-protein mannosyltransferase [EC:2.4.1.109]	1.3238	3.23433	8.63015	15.9831	2.38768	5.61525	6.83619	12.6038	6.86072	0.606858	0.922003	0.279605	0.396404
Methanoperedens_03087	Acetyl-CoA decarbonylase/synthase complex subunit alpha 2	0	Acetyl-CoA decarbonylase/synthase complex subunit alpha	1541.9	Acetyl-CoA decarbonylase/synthase complex subunit alpha	K00192	1194.3	0	aerobic carbon-monoxide dehydrogese, CODH/ACS complex subunit alpha [EC:1.2.7.4]	126.76	68.8224	339.378	367.267	279.358	145.997	328.479	370.998	281.208	0.606594	0.353158	0.0676877	0.130174
Methanoperedens_02423	hypothetical protein	0		892.1	Putative RAMP superfamily protein probably involved in D repair	K09002	127.8	1.1e-37	CRISPR-associated protein Csm3	9.5461	0	24.8932	33.6902	11.9384	0	13.6724	19.3122	11.2308	0.605934	0.816815	0.292379	0.411653
Methanoperedens_02417	hypothetical protein	0		370.5	Transposase					0	0	14.2617	22.1646	0	0	3.7599	6.70846	2.61709	0.605226	1.17257	0.174977	0.276593
Methanoperedens_00240	hypothetical protein	0	Uncharacterized protein MJ0047	745.7	Putative exonuclease of the beta-lactamase fold involved in R processing	K07041	318.1	2.3e-95	uncharacterized protein	30.4331	11.4391	81.649	96.0988	31.0398	11.2305	36.5736	44.9264	30.9426	0.604757	0.562311	0.210862	0.318175
Methanoperedens_01808	Type A flavoprotein FprA	0	Nitric oxide reductase	824.3	Putative flavoprotein	K12264	566.7	4.6e-171	aerobic nitric oxide reductase flavorubredoxin	50.5382	61.7377	199.054	182.271	57.3043	67.383	99.1247	94.7316	79.6359	0.603736	0.349739	0.0660087	0.127566
Methanoperedens_02994	hypothetical protein	0		1836.6	Uncharacterized protein	K14201	35.4	1e-09	clumping factor A	46.0846	44.2336	166.849	153.776	136.098	129.151	211.922	203.287	170.114	0.603648	0.256267	0.0150539	0.037463
Methanoperedens_01484	Carbamate kise	0	Carbamate kise	602.1	Carbamate kise	K00926	419.4	3.8e-126	carbamate kise [EC:2.7.2.2]	0	0	11.744	20.0768	0	0	4.44352	5.48874	2.48307	0.601163	1.16609	0.182356	0.284412
Methanoperedens_00333	hypothetical protein	0	Uncharacterized protein MJ0414	785	R ligase, Pab1020 family	K07468	464.1	5.5e-140	putative ATP-dependent D ligase [EC:6.5.1.1]	66.0884	32.2936	191.725	187.001	71.6304	33.6915	91.2631	92.2922	72.2193	0.600215	0.41673	0.119285	0.204478
Methanoperedens_02599	2-oxoglutarate synthase subunit KorB	0	2-oxoglutarate synthase subunit KorB	573.9	2-oxoacid:ferredoxin oxidoreductase, beta subunit	K00175	352.4	1.1e-105	2-oxoglutarate/2-oxoacid ferredoxin oxidoreductase subunit beta [EC:1.2.7.3 1.2.7.11]	74.4389	98.5129	277.015	304.191	57.3043	72.9983	93.6558	106.522	82.6202	0.598233	0.359585	0.0748484	0.141752
Methanoperedens_01455	Methylated-D--protein-cysteine methyltransferase	0	Methylated-D--protein-cysteine methyltransferase	316.2	Methylated-D--[protein]-cysteine S-methyltransferase	K00567	154.4	1e-45	methylated-D-[protein]-cysteine S-methyltransferase [EC:2.1.1.63]	5.36968	0	29.7551	32.9144	2.38768	0	5.81076	6.70846	3.72673	0.595383	1.01073	0.27395	0.389405
Methanoperedens_03454	hypothetical protein	0		320.5	Uncharacterized protein					16.313	0	60.2636	55.5517	7.16304	0	11.6215	10.5709	7.33887	0.595057	0.863562	0.304384	0.425178
Methanoperedens_00262	hypothetical protein	0		363.6	Phosphoesterase	K07095	143.8	9.9e-43	uncharacterized protein	14.0844	57.352	122.425	131.679	7.16304	28.0763	27.3448	29.4766	23.0152	0.593418	0.686076	0.254074	0.367572
Methanoperedens_00850	3,4-dihydroxy-2-butanone 4-phosphate synthase	0	3,4-dihydroxy-2-butanone 4-phosphate synthase	457.2	3,4-dihydroxy-2-butanone 4-phosphate synthase	K02858	221.9	3.2e-66	3,4-dihydroxy 2-butanone 4-phosphate synthase [EC:4.1.99.12]	29.7541	18.1739	118.808	138.169	19.1014	11.2305	33.4973	24.1911	22.0051	0.593128	0.612662	0.242929	0.35525
Methanoperedens_03051	hypothetical protein	0		151	Transposase	K20316	27.3	3.8e-07	short coiled-coil protein	10.6727	0	34.7886	40.6396	2.38768	0	4.78533	8.13147	3.82612	0.591888	1.02033	0.271143	0.386161
Methanoperedens_00315	Exosome complex component Rrp41	0	Exosome complex component Rrp41	477.6	Exosome complex component Rrp41	K11600	341.5	1.1e-102	exosome complex component RRP41	199.884	334.14	864.149	880.648	136.098	218.995	258.408	274.844	222.086	0.591064	0.309813	0.0431836	0.0907494
Methanoperedens_01054	F(420)H(2) dehydrogese subunit L	0	DH-quinone oxidoreductase subunit N	917.1	DH:ubiquinone oxidoreductase subunit 5 (Chain L)/multisubunit +/H+ antiporter, MnhA subunit	K05568	493.6	1.8e-148	multicomponent +:H+ antiporter subunit D	55.8796	51.1972	181.007	190.723	76.4057	67.383	108.695	119.736	93.055	0.590321	0.329846	0.0594805	0.11817
Methanoperedens_02560	Ribonuclease Z	0	Ribonuclease Z	620.9	Ribonuclease Z	K00784	274.2	4.5e-82	ribonuclease Z [EC:3.1.26.11]	25.3519	34.4112	99.1646	113.541	21.4891	28.0763	36.9154	42.6902	32.2928	0.59005	0.51288	0.187302	0.290687
Methanoperedens_03219	hypothetical protein	0		502.3	Uncharacterized protein					0	0	12.5225	20.1103	0	0	3.7599	6.30189	2.51545	0.586201	1.1603	0.185896	0.288746
Methanoperedens_00175	hypothetical protein	0		703.7	Site-specific D-methyltransferase (adenine-specific)					58.9131	53.9764	205.635	189.222	57.3043	50.5373	87.845	84.364	70.0127	0.582632	0.362336	0.0868701	0.158898
Methanoperedens_02410	hypothetical protein	0		1024.2	Lipase (Class 2)	K01046	38	2.5e-10	triacylglycerol lipase [EC:3.1.1.3]	0	0	11.1796	5.41506	0	0	6.83619	3.45587	2.57302	0.581979	1.15958	0.185141	0.287845
Methanoperedens_01317	hypothetical protein	0		708.8	Transposase family protein	K07495	138.4	6e-41	putative transposase	1.96153	0	13.427	18.9462	2.38768	5.61525	7.178	11.1808	6.59043	0.581573	0.904067	0.298585	0.41852
Methanoperedens_01077	hypothetical protein	0		1146.7	Uncharacterized protein	K03546	34	2.3e-09	D repair protein SbcC/Rad50	0	0	4.80357	9.30684	0	0	3.41809	6.91175	2.58246	0.581464	1.16019	0.184448	0.287358
Methanoperedens_03542	hypothetical protein	0		151	Transposase	K20316	27.3	3.8e-07	short coiled-coil protein	5.33633	13.0378	33.0492	32.71	2.38768	0	5.12714	7.31832	3.70829	0.580204	1.00998	0.28096	0.397598
Methanoperedens_02338	Chorismate dehydratase	0		553.5	Chorismate dehydratase	K11782	217.5	5.6e-65	chorismate dehydratase [EC:4.2.1.151]	24.9934	22.8991	93.6889	87.0463	19.1014	16.8458	31.4465	30.493	24.4717	0.5798	0.552118	0.221665	0.33133
Methanoperedens_00857	hypothetical protein	0		111.7	Uncharacterized protein					0	0	39.3818	94.7536	0	0	3.07629	7.7249	2.7003	0.578808	1.16234	0.18019	0.282173
Methanoperedens_00337	putative protein	0	A-adding tR nucleotidyltransferase	505.8	Putative sigl-transduction protein	K04767	104.1	1.4e-30	acetoin utilization protein AcuB	69.9307	113.904	298.501	296.284	50.1413	78.6135	93.9976	97.171	79.9809	0.57843	0.375484	0.0956904	0.172255
Methanoperedens_02218	hypothetical protein	0		361.7	Poly(3-hydroxyalkanoate) polymerase subunit PhaE	K22881	101.2	1.8e-29	polyhydroxyalkanoate synthase subunit PhaE	3.67158	8.97044	27.5261	36.1453	2.38768	5.61525	7.86162	9.96105	6.4564	0.575629	0.892708	0.304987	0.425812
Methanoperedens_00505	Ubiquinone biosynthesis O-methyltransferase, mitochondrial	0	Sterol 24-C-methyltransferase erg-4	531.6	Methyltransferase family protein	K18534	112.2	7e-33	MPBQ/MSBQ methyltransferase [EC:2.1.1.295]	13.167	16.0849	52.5761	62.3665	9.55072	11.2305	16.7487	20.7352	14.5663	0.574847	0.683724	0.281694	0.397992
Methanoperedens_00779	hypothetical protein	0		196.8	ABM domain-containing protein	K21481	25.8	2.1e-06	heme oxygese (mycobilin-producing) [EC:1.14.99.57]	0	0	40.0069	37.4536	0	0	4.78533	4.67559	2.36523	0.573674	1.1496	0.197929	0.302736
Methanoperedens_01348	hypothetical protein	0		537.3	ABC-type transport system involved in multi-copper enzyme maturation, permease component					0	0	11.1647	17.496	0	0	4.10171	5.48874	2.39761	0.573589	1.15076	0.196188	0.300694
Methanoperedens_03276	hypothetical protein	0	Uncharacterized protein MJ0660	131	Putative R-binding protein, contains TRAM domain	K03215	46.3	5.2e-13	23S rR (uracil1939-C5)-methyltransferase [EC:2.1.1.190]	0	0	46.0353	59.0246	0	0	4.10171	5.48874	2.39761	0.573589	1.15076	0.196188	0.300694
Methanoperedens_01768	hypothetical protein	0	Diadenylate cyclase	483.4	Diadenylate cyclase	K18672	120.1	2.5e-35	diadenylate cyclase [EC:2.7.7.85]	10.1474	0	27.5638	42.0952	7.16304	0	8.54524	13.6202	7.33212	0.57099	0.879789	0.318766	0.441357
Methanoperedens_00033	hypothetical protein	0	Modification methylase BsoBI	907.1	Site-specific D-methyltransferase (cytosine-N(4)-specific)	K24451	76.4	4.6e-22	modification methylase	31.3129	19.126	89.3092	101.058	38.2029	22.461	47.8533	56.5137	41.2577	0.569929	0.473586	0.180884	0.282892
Methanoperedens_00649	hypothetical protein	0		203	Uncharacterized protein					8.18237	0	61.3439	39.5163	2.38768	0	7.86162	4.67559	3.73122	0.56759	1.01015	0.286061	0.403157
Methanoperedens_01974	hypothetical protein	0	UPF0331 protein AF_2433	258.1	Uncharacterized protein					18.9518	0	70.0121	57.4975	7.16304	0	11.6215	9.96105	7.1864	0.567295	0.859975	0.323349	0.445143
Methanoperedens_00471	hypothetical protein	0		143.3	Uncharacterized conserved small protein					0	0	42.1991	76.5133	0	0	3.7599	5.89531	2.4138	0.566358	1.14814	0.198019	0.302736
Methanoperedens_01939	L-rhamnose 1-dehydrogese (DP(+))	0	3-oxoacyl-[acyl-carrier-protein] reductase FabG	473	Uncharacterized protein	K00059	319.7	6e-96	3-oxoacyl-[acyl-carrier protein] reductase [EC:1.1.1.100]	0	0	17.007	13.5679	0	0	5.12714	4.26902	2.34904	0.566011	1.14566	0.201727	0.307523
Methanoperedens_01567	hypothetical protein	0		168.7	Uncharacterized protein					169.832	195.264	605.686	625.35	40.5905	44.922	63.5766	68.5076	54.3992	0.564393	0.404354	0.129689	0.219005
Methanoperedens_03434	hypothetical protein	0		472.2	Putative acyltransferase	K02536	22.4	1e-05	UDP-3-O-[3-hydroxymyristoyl] glucosamine N-acyltransferase [EC:2.3.1.191]	21.4023	29.8802	76.7392	105.065	16.7138	22.461	26.3193	37.608	25.7755	0.563753	0.586229	0.248045	0.360531
Methanoperedens_00457	hypothetical protein	0		745.7	WD40 repeat-containing protein					44.1185	39.7124	145.322	147.077	45.3659	39.3068	65.6274	69.3208	54.9052	0.563173	0.399416	0.127978	0.216891
Methanoperedens_02678	hypothetical protein	0	Uncharacterized protein MJ1547	307.4	Putative nucleotidyltransferase	K07076	46.7	6.9e-13	uncharacterized protein	0	0	25.4589	22.7978	0	0	4.78533	4.47231	2.31441	0.559486	1.1418	0.206047	0.312932
Methanoperedens_00865	Pyruvate synthase subunit PorC	0	Pyruvate synthase subunit PorC	353.2	2-oxoacid:acceptor oxidoreductase, gamma subunit, pyruvate/2-ketoisovalerate family	K00172	250.5	3.8e-75	pyruvate ferredoxin oxidoreductase gamma subunit [EC:1.2.7.1]	99.1326	138.401	381.604	386.687	50.1413	67.383	84.7687	89.6494	72.9856	0.558997	0.369288	0.103959	0.183988
Methanoperedens_01545	hypothetical protein	0								146.522	65.0879	377.74	446.59	52.5289	22.461	59.4748	70.9471	51.353	0.55793	0.476152	0.192818	0.297135
Methanoperedens_03004	hypothetical protein	0		1035.8	Uncharacterized protein	K17285	24.8	1.3e-06	methanethiol oxidase [EC:1.8.3.4]	2.55319	6.23799	19.1415	14.9389	4.77536	11.2305	15.7232	12.6038	11.0832	0.556499	0.769135	0.310812	0.432194
Methanoperedens_03086	Acetyl-CoA decarbonylase/synthase complex subunit epsilon	0	Acetyl-CoA decarbonylase/synthase complex subunit epsilon	367.5	Acetyl-CoA decarbonylase/synthase complex subunit epsilon	K00195	193.2	5.3e-58	aerobic carbon-monoxide dehydrogese, CODH/ACS complex subunit epsilon	65.37	68.4484	225.256	235.041	33.4275	33.6915	50.5878	55.0907	43.1994	0.555803	0.441646	0.165668	0.265107
Methanoperedens_02972	Type-1 restriction enzyme MjaXIP specificity protein	0		857.4	Restriction endonuclease S subunit	K01154	154	1.2e-45	type I restriction enzyme, S subunit [EC:3.1.21.3]	11.7961	14.4102	46.7815	48.2041	14.3261	16.8458	24.9521	26.6306	20.6886	0.554955	0.590735	0.260501	0.374388
Methanoperedens_01810	Chemotaxis protein CheY	0	Alkaline phosphatase synthesis transcriptiol regulatory protein PhoP	242.7	Response regulator with CheY-like receiver domain and winged-helix D-binding domain	K07658	156.3	1.5e-46	two-component system, OmpR family, alkaline phosphatase synthesis response regulator PhoP	28.1688	17.2056	103.296	112.494	9.55072	5.61525	15.3814	15.4498	11.4993	0.554193	0.720242	0.313225	0.434745
Methanoperedens_02329	hypothetical protein	0		358.2	Uncharacterized protein					9.49336	11.5971	51.0585	44.9659	4.77536	5.61525	11.2797	10.3676	8.00949	0.553835	0.812071	0.324992	0.44649
Methanoperedens_00499	ADP-L-glycero-D-manno-heptose-6-epimerase	0	Uncharacterized UDP-glucose epimerase YtcB	628.6	Nucleoside-diphosphate-sugar epimerase	K08679	341	2.8e-102	UDP-glucurote 4-epimerase [EC:5.1.3.6]	8.34125	0	32.627	23.2405	7.16304	0	12.3051	9.1479	7.15402	0.553222	0.863692	0.332718	0.454571
Methanoperedens_01020	hypothetical protein	0		268.1	Uncharacterized protein					139.158	133.04	463.46	460.773	54.9166	50.5373	80.3252	83.3476	67.2817	0.552095	0.365701	0.10743	0.188234
Methanoperedens_01358	Phosphoadenosine phosphosulfate reductase	1	Uncharacterized protein MJ0066	1309.7	PAPS reductase/FAD synthetase family protein	K00390	186.1	2e-55	phosphoadenosine phosphosulfate reductase [EC:1.8.4.8 1.8.4.10]	24.7706	22.2968	84.5669	80.64	45.3659	39.3068	68.0201	65.8649	54.6394	0.551829	0.39827	0.134826	0.225133
Methanoperedens_01397	hypothetical protein	0		142.5	Uncharacterized conserved small protein					46.4405	0	136.24	144.489	9.55072	0	12.3051	13.6202	8.86902	0.550974	0.818732	0.334208	0.455995
Methanoperedens_02745	Sulfhydrogese 2 subunit delta	0	Sulfhydrogese 2 subunit delta	496.9	Coenzyme F420-reducing hydrogese, gamma subunit	K17994	278.3	7.7e-84	sulfhydrogese subunit delta [EC:1.12.1.3 1.12.1.5]	0	0	16.736	12.7159	0	0	5.12714	4.06573	2.29822	0.550546	1.13745	0.210556	0.317907
Methanoperedens_01058	D-directed R polymerase subunit D	0	D-directed R polymerase subunit D	452.2	D-directed R polymerase subunit D	K03047	306.3	3.6e-92	D-directed R polymerase subunit D [EC:2.7.7.6]	345.431	367.881	1171.2	1136.84	279.358	286.378	415.982	421.21	350.732	0.550383	0.196311	0.00417765	0.0124496
Methanoperedens_00788	hypothetical protein	0		288.1	Yip1 domain					4.29574	0	33.6058	33.5128	2.38768	0	8.20343	4.26902	3.71503	0.549837	1.00887	0.294755	0.414293
Methanoperedens_00681	hypothetical protein	0		334.7	DUF4382 domain-containing protein					126.92	83.4863	353.243	398.056	62.0797	39.3068	75.8817	89.2429	66.6278	0.54947	0.399677	0.138936	0.230101
Methanoperedens_00707	V-type ATP synthase beta chain	0	V-type ATP synthase beta chain	919.8	V-type ATP synthase beta chain	K02118	743.9	1.1e-224	V/A-type H+/+-transporting ATPase subunit B	340.312	408.912	1197.18	1190.32	436.945	505.373	675.074	701.136	579.632	0.548442	0.18436	0.00242718	0.00773699
Methanoperedens_01276	Putative aminoacrylate hydrolase RutD	0	2-hydroxy-6-oxonodienedioate/2-hydroxy-6-oxonotrienedioate hydrolase	636.3	Putative hydrolase or acyltransferase of alpha/beta superfamily	K05714	158.3	6e-47	2-hydroxy-6-oxono-2,4-dienedioate hydrolase [EC:3.7.1.14]	26.599	0	62.4256	78.5573	23.8768	0	24.6103	30.6963	19.7958	0.547428	0.764857	0.327692	0.449329
Methanoperedens_01645	Regulator of RpoS	0	Phosphate regulon transcriptiol regulatory protein PhoB	705.3	PAS domain S-box	K13587	134.1	8.1e-40	two-component system, cell cycle sensor histidine kise and response regulator CckA [EC:2.7.13.3]	52.6498	76.0114	210.621	201.815	52.5289	72.9983	92.2886	91.479	77.3237	0.547313	0.362122	0.104831	0.18484
Methanoperedens_01993	Uroporphyrinogen-III C-methyltransferase	0	Cobalamin biosynthesis protein CbiHC	487.6	Precorrin-3B C17-methyltransferase	K05934	379	6.5e-114	precorrin-3B C17-methyltransferase [EC:2.1.1.131]	20.1363	0	60.1666	54.8573	14.3261	0	18.7995	16.6695	12.4488	0.546134	0.775895	0.332957	0.454571
Methanoperedens_03374	hypothetical protein	0		210.7	4Fe-4S protein	K00196	47.6	2e-13	aerobic carbon-monoxide dehydrogese iron sulfur subunit	0	0	30.2013	42.2431	0	0	3.7599	5.48874	2.31216	0.54584	1.13617	0.211444	0.318336
Methanoperedens_00107	hypothetical protein	0		439.9	Methyltransferase family protein	K15444	31.5	1.6e-08	tR (uracil-5-)-methyltransferase TRM9 [EC:2.1.1.229]	3.90522	9.54129	25.4589	38.4455	2.38768	5.61525	6.83619	10.7742	6.40333	0.545601	0.895701	0.323013	0.445143
Methanoperedens_02352	hypothetical protein	0		266.9	Pyridoxamine 5'-phosphate oxidase-related, FMN binding	K07006	33.5	4.6e-09	uncharacterized protein	193.793	126.261	530.618	602.343	71.6304	44.922	86.136	102.05	76.1846	0.544853	0.386322	0.131051	0.22091
Methanoperedens_01288	hypothetical protein	0		337.8	Putative nucleic acid-binding protein, contains PIN domain	K07066	43.8	4.7e-12	uncharacterized protein	14.5618	0	50.6302	44.1789	7.16304	0	10.9379	9.96105	7.0155	0.541089	0.853795	0.342683	0.464561
Methanoperedens_01316	hypothetical protein	0	UPF0182 protein Mhun_1303	1736.9	UPF0182 protein ANME2D_03089	K09118	1050.9	0	uncharacterized protein	51.5684	73.6938	193.465	200.069	126.547	174.073	208.504	225.038	183.541	0.539763	0.280701	0.0443473	0.0927826
Methanoperedens_02413	hypothetical protein	0		165.2	Peptidase inhibitor I9					26.5716	21.64	115.484	98.7123	7.16304	5.61525	13.6724	12.1972	9.66197	0.538877	0.759233	0.33243	0.454508
Methanoperedens_03009	hypothetical protein	0		707.2	FemAB family	K11693	96.4	3.5e-28	peptidoglycan pentaglycine glycine transferase (the first glycine) [EC:2.3.2.16]	0	0	13.0635	8.37472	0	0	5.46895	3.65916	2.28203	0.536748	1.13118	0.217218	0.325884
Methanoperedens_02061	Potassium-transporting ATPase ATP-binding subunit	0	Sodium/potassium-transporting ATPase subunit alpha-4	1610.5	P-type ATPase, translocating	K01539	949.9	3.8e-286	sodium/potassium-transporting ATPase subunit alpha [EC:7.2.2.13]	0	0	5.42853	3.63934	0	0	5.81076	3.45587	2.31666	0.536315	1.132	0.215488	0.323538
Methanoperedens_03376	Tungsten-containing aldehyde ferredoxin oxidoreductase	0	Tungsten-containing aldehyde ferredoxin oxidoreductase	1274.2	Aldehyde ferredoxin oxidoreductase	K03738	743.7	5.4e-224	aldehyde:ferredoxin oxidoreductase [EC:1.2.7.5]	76.612	73.5348	248.833	242.427	133.71	123.536	190.73	193.936	160.478	0.53561	0.258721	0.0326537	0.0718441
Methanoperedens_02965	Cytidylate kise	0	Cytidylate kise	343.6	Cytidylate kise	K00945	63.2	4.4e-18	CMP/dCMP kise [EC:2.7.4.25]	44.4387	84.4459	206.013	203.608	21.4891	39.3068	43.7516	45.3329	37.4701	0.535446	0.498804	0.218395	0.327477
Methanoperedens_02050	hypothetical protein	0	Phenylacetate-coenzyme A ligase	914.1	Coenzyme F390 synthetase	K01912	262.5	1.9e-78	phenylacetate-CoA ligase [EC:6.2.1.30]	0	0	9.35573	6.75304	0	0	5.12714	3.86245	2.2474	0.534773	1.12938	0.220017
Methanoperedens_00669	Tol-Pal system protein TolB	0		476.5	Uncharacterized protein	K03641	109.5	5.1e-32	TolB protein	14.0844	25.0263	56.7609	71.5873	26.2645	44.922	46.4861	58.5466	44.0548	0.534485	0.487558	0.211487	0.318336
Methanoperedens_03201	hypothetical protein	0		323.9	Uncharacterized protein					15.0728	36.826	101.538	79.3258	7.16304	16.8458	21.1922	17.2794	15.6201	0.534438	0.692587	0.31093	0.432194
Methanoperedens_02237	Peptide chain release factor subunit 1	0	Peptide chain release factor subunit 1	820.8	Peptide chain release factor subunit 1	K03265	428.1	1.1e-128	peptide chain release factor subunit 1	192.069	136.239	560.77	546.271	222.054	151.612	284.727	287.244	236.409	0.533709	0.26788	0.039969	0.0848743
Methanoperedens_02471	Chaperone protein TorD	0		383.3	Putative component of aerobic dehydrogese	K23349	146.1	4.4e-43	putative dimethyl sulfoxide reductase chaperone	0	11.5971	26.3029	36.1491	0	5.61525	5.81076	8.33476	4.94019	0.532825	0.992736	0.265281	0.379527
Methanoperedens_03364	hypothetical protein	0		463	RecA-superfamily ATPase possibly involved in sigl transduction	K08482	45.8	5.8e-13	circadian clock protein KaiC	44.0589	62.7931	169.944	176.635	28.6522	39.3068	48.5369	52.6513	42.2868	0.532653	0.454817	0.191767	0.295845
Methanoperedens_02705	hypothetical protein	0		269.6	Uncharacterized protein					0	15.2107	48.704	33.536	0	5.61525	8.20343	5.89531	4.9285	0.531693	0.991112	0.266679	0.380951
Methanoperedens_02588	hypothetical protein	0		281.6	HEPN domain-containing protein	K09132	79.4	4.8e-23	uncharacterized protein	24.373	119.097	204.574	285.216	9.55072	44.922	35.2064	51.2283	35.2268	0.525825	0.690209	0.308888	0.430411
Methanoperedens_01522	tR-specific adenosine deamise	0	Deoxycytidylate deamise	307.8	Deoxycytidylate deamise	K01493	173.3	1.9e-51	dCMP deamise [EC:3.5.4.12]	51.5489	55.9756	190.433	180.863	21.4891	22.461	34.8646	34.5587	28.3434	0.525679	0.516129	0.243782	0.355766
Methanoperedens_00343	hypothetical protein	0	Uncharacterized ABC transporter permease MJ1507	781.9	ABC-type antimicrobial peptide transport system, permease component	K02004	120.5	1.2e-35	putative ABC transport system permease protein	6.15142	10.0195	32.0819	30.4697	7.16304	11.2305	16.4069	14.8399	12.4101	0.52176	0.710332	0.331817	0.454327
Methanoperedens_02075	Sensor histidine kise RcsC	0	Sensor kise CckA	594	PAS domain S-box	K13587	404.1	1.8e-121	two-component system, cell cycle sensor histidine kise and response regulator CckA [EC:2.7.13.3]	0	0	13.8638	18.4339	2.38768	0	4.44352	7.11503	3.48656	0.521246	0.993115	0.318232	0.441047
Methanoperedens_00488	hypothetical protein	0		456.4	WbqC-like protein					0	0	19.8264	12.0042	0	0	5.46895	3.45587	2.23121	0.519931	1.12293	0.227515
Methanoperedens_00340	Precorrin-2 dehydrogese	0	Precorrin-2 dehydrogese	421.4	Precorrin-2 dehydrogese	K02304	187.3	7e-56	precorrin-2 dehydrogese / sirohydrochlorin ferrochelatase [EC:1.3.1.76 4.99.1.4]	39.4105	38.5153	138.74	131.767	23.8768	22.461	36.9154	36.5916	29.9612	0.519714	0.503009	0.241054	0.353239
Methanoperedens_00894	N-alpha-acetyltransferase	0		288.1	Acetyltransferase	K03789	117.4	2e-34	[ribosomal protein S18]-alanine N-acetyltransferase [EC:2.3.1.266]	5.7661	0	35.7109	25.705	2.38768	0	6.49438	4.87888	3.44024	0.519679	0.987292	0.321942	0.444668
Methanoperedens_01154	hypothetical protein	0		406.4	LUD_dom domain-containing protein					125.729	143.352	487.694	383.004	71.6304	78.6135	122.026	99.4072	92.9193	0.516169	0.348719	0.115137	0.19893
Methanoperedens_00379	hypothetical protein	0		612.5	Methylase involved in ubiquinone/mequinone biosynthesis	K18534	26.4	7.8e-07	MPBQ/MSBQ methyltransferase [EC:2.1.1.295]	63.8557	14.183	173.138	139.637	52.5289	11.2305	62.5511	52.6513	44.7405	0.515094	0.585561	0.297122	0.41721
Methanoperedens_01452	Ribonuclease VapC9	0		240.4	PilT domain protein	K07158	101.9	6e-30	uncharacterized protein	55.8796	17.0657	159.377	151.8	19.1014	5.61525	23.9267	23.7845	18.107	0.512886	0.635628	0.323384	0.445143
Methanoperedens_01535	FAD synthase	0	FAD synthase	276.6	FAD synthase	K14656	192.4	1.7e-57	FAD synthetase [EC:2.7.7.2]	0	14.9935	36.0062	41.0361	0	5.61525	6.15257	7.31832	4.77154	0.512203	0.982112	0.281245	0.397753
Methanoperedens_01239	hypothetical protein	0		253.8	Putative archaeal flagellar protein F	K07329	103.4	2.3e-30	archaeal flagellar protein FlaF	12.7281	0	60.1585	39.0097	4.77536	0	9.91247	6.0986	5.19661	0.508367	0.914938	0.358148	0.480636
Methanoperedens_00790	Methyl-coenzyme M reductase II operon protein D	0	Methyl-coenzyme M reductase operon protein D	352.1	Methyl-coenzyme M reductase operon protein D	K03422	189.2	6.6e-57	methyl-coenzyme M reductase subunit D	745.583	470.484	2048.86	1948.04	360.54	218.995	435.123	431.781	361.61	0.506533	0.293476	0.0734869	0.139546
Methanoperedens_02090	hypothetical protein	0	Uncharacterized protein MJ0043	826.2	TIGR00375 family protein					21.2136	10.3658	65.6903	77.6253	23.8768	11.2305	32.4719	29.2733	24.2131	0.506458	0.563008	0.293552	0.413098
Methanoperedens_01971	hypothetical protein	0	Inter alpha-trypsin inhibitor, heavy chain 4	1263.1	PGF-CTERM archaeal protein-sorting sigl	K07114	111.2	1.2e-32	Ca-activated chloride channel homolog	241.554	220.117	711.612	761.788	441.721	387.452	571.505	632.018	508.174	0.506189	0.197614	0.00914544	0.024593
Methanoperedens_01183	hypothetical protein	0	Putative 6-carboxy-5,6,7,8-tetrahydropterin synthase	322	6-pyruvoyl-tetrahydropterin synthase	K01737	78.3	1.1e-22	6-pyruvoyltetrahydropterin/6-carboxytetrahydropterin synthase [EC:4.2.3.12 4.1.2.50]	5.36968	0	24.5042	30.9196	2.38768	0	4.78533	6.30189	3.36873	0.505872	0.98324	0.332188	0.454396
Methanoperedens_03325	Putative methylthioribose-1-phosphate isomerase	0	Putative methylthioribose-1-phosphate isomerase	673.3	Putative methylthioribose-1-phosphate isomerase	K08963	466.2	4.1e-140	methylthioribose-1-phosphate isomerase [EC:5.3.1.23]	40.4305	24.6951	118.609	131.892	38.2029	22.461	49.2206	49.8052	39.9224	0.505236	0.460792	0.225691	0.335948
Methanoperedens_03132	Lipoate-protein ligase A subunit 1	0	Octanoyltransferase LipM	533.9	Lipoate-protein ligase A	K03800	262	3.1e-78	lipoate---protein ligase [EC:6.3.1.20]	13.372	0	34.8698	45.9505	9.55072	0	10.9379	13.8235	8.57803	0.504902	0.817869	0.370714	0.493763
Methanoperedens_03359	hypothetical protein	0		1014.6	Uncharacterized protein					217.032	277.927	740.615	785.692	346.214	426.759	518.867	574.488	466.582	0.503205	0.216037	0.0168007	0.0409218
Methanoperedens_01413	hypothetical protein	0		105.5	Uncharacterized protein					0	0	41.0737	59.5784	0	0	3.7599	4.67559	2.10887	0.501706	1.11267	0.243427
Methanoperedens_01530	hypothetical protein	0	Uncharacterized protein MTH_987	797.7	Putative methanogenesis marker protein 1	K24409	494.5	3.8e-149	thioglycine synthase [EC:6.2.2.1]	60.0369	96.1026	249.007	226.88	69.2427	106.69	126.128	119.939	105.5	0.50116	0.342034	0.117606	0.202089
Methanoperedens_02367	Lipoate-protein ligase A subunit 2	0	Lipoate-protein ligase A subunit 2	191	Lipoate--protein ligase	K03800	25.3	1.9e-06	lipoate---protein ligase [EC:6.3.1.20]	0	0	34.6451	34.5493	0	0	4.10171	4.26902	2.09268	0.50109	1.1119	0.244901
Methanoperedens_02473	Adaptive-response sensory-kise SasA	0	Sporulation kise C	860.5	Histidine kise	K02482	310.4	4e-93	two-component system, NtrC family, sensor kise [EC:2.7.13.3]	16.6645	27.1433	76.6511	62.9397	21.4891	33.6915	43.4098	37.2015	33.948	0.501037	0.506688	0.256238	0.369863
Methanoperedens_02514	50S ribosomal protein L32e	0	50S ribosomal protein L32e	293.9	50S ribosomal protein L32e	K02912	156.5	1.9e-46	large subunit ribosomal protein L32e	206.196	209.908	729.992	606.423	85.9565	84.2288	133.648	115.873	104.927	0.500941	0.318266	0.0980773	0.175592
Methanoperedens_02722	hypothetical protein	0		187.2	Uncharacterized protein					0	0	29.4788	41.996	0	0	3.41809	5.08217	2.12507	0.497503	1.11165	0.244289
Methanoperedens_03044	hypothetical protein	0		1003	Uncharacterized protein					7.79627	3.80959	22.3632	26.6458	11.9384	5.61525	15.0396	18.7024	12.8239	0.497197	0.695053	0.35651	0.479119
Methanoperedens_02704	hypothetical protein	0		257.7	Polbeta domain-containing protein	K07076	35.2	2.1e-09	uncharacterized protein	0	0	26.9676	22.4601	0	0	4.44352	3.86245	2.07649	0.495626	1.10937	0.248759
Methanoperedens_02427	hypothetical protein	0		729.6	Putative RAMP superfamily protein probably involved in D repair	K19134	122.1	7.1e-36	CRISPR-associated protein Csx10	2.3474	5.7352	14.538	21.3652	2.38768	5.61525	6.49438	9.96105	6.11459	0.494679	0.882376	0.362054	0.484503
Methanoperedens_01023	4-hydroxybenzoate polyprenyltransferase, mitochondrial	0		552.4	4-hydroxybenzoate polyprenyltransferase	K03179	273.1	8.9e-82	4-hydroxybenzoate polyprenyltransferase [EC:2.5.1.39]	14.8129	14.4764	53.1126	54.479	11.9384	11.2305	18.7995	20.1254	15.5235	0.494042	0.640252	0.338548	0.459991
Methanoperedens_00291	D(P)H-quinone oxidoreductase subunit 2, chloroplastic	0	Hydrogese-4 component B	1241.9	Formate hydrogenlyase subunit 3/multisubunit +/H+ antiporter, MnhD subunit	K12137	697.2	5.4e-210	hydrogese-4 component B [EC:1.-.-.-]	1.27093	6.21031	19.4708	15.5808	2.38768	11.2305	16.065	8.53804	9.55532	0.493964	0.852294	0.354938	0.477457
Methanoperedens_00297	hypothetical protein	0	Uncharacterized protein YeaC	615.1	MoxR-like ATPase	K03924	422.2	4.6e-127	MoxR-like ATPase [EC:3.6.3.-]	228.381	239.136	724.049	734.293	200.565	202.149	279.258	295.579	244.388	0.493808	0.223906	0.0238188	0.0551625
Methanoperedens_02351	2'-deoxynucleoside 5'-phosphate N-hydrolase 1	0	Putative 2'-deoxynucleoside 5'-phosphate N-hydrolase 1	280.4	Putative 2'-deoxynucleoside 5'-phosphate N-hydrolase 1	K22928	136.2	3.2e-40	2'-deoxynucleoside 5'-phosphate N-hydrolase [EC:3.2.2.-]	6.05034	0	25.6382	43.8297	2.38768	0	4.44352	6.50517	3.33409	0.492607	0.981493	0.340963	0.462994
Methanoperedens_00961	hypothetical protein	0		229.9	Uncharacterized protein					307.862	209.908	963.833	773.987	102.67	67.383	141.167	118.313	107.383	0.492547	0.34739	0.13431	0.224536
Methanoperedens_02404	hypothetical protein	0	Uncharacterized ABC transporter permease MJ1507	636	ABC-type transport system, involved in lipoprotein release, permease component	K02004	89.6	2.9e-26	putative ABC transport system permease protein	12.4876	6.10199	35.8201	43.6075	11.9384	5.61525	15.0396	18.4991	12.7731	0.491515	0.693805	0.361475	0.483956
Methanoperedens_03322	hypothetical protein	0		382.5	Uncharacterized protein					23.0954	11.2854	79.7987	65.2067	11.9384	5.61525	18.1159	15.4498	12.7798	0.490595	0.69023	0.361296	0.483946
Methanoperedens_03420	Tetrahydromethanopterin S-methyltransferase subunit H	0	Tetrahydromethanopterin S-methyltransferase subunit H	609	N5-methyltetrahydromethanopterin:coenzyme M methyltransferase subunit H	K00584	342.6	3.4e-103	tetrahydromethanopterin S-methyltransferase subunit H [EC:2.1.1.86]	13.9927	27.3496	87.5721	53.5415	11.9384	22.461	32.8137	20.3287	21.8854	0.49057	0.644634	0.334482	0.455995
Methanoperedens_00885	hypothetical protein	0		239.6	Translation initiation inhibitor	K09022	77.7	1.9e-22	2-iminobutanoate/2-iminopropanoate deamise [EC:3.5.99.10]	0	0	20.0034	19.3782	0	0	3.07629	5.48874	2.14126	0.489261	1.10913	0.247162
Methanoperedens_02508	50S ribosomal protein L14	0	50S ribosomal protein L14	255	50S ribosomal protein L14	K02874	134.3	1e-39	large subunit ribosomal protein L14	200.253	173.608	631.688	585.545	74.0181	61.7678	102.543	99.2039	84.3832	0.487593	0.332943	0.123116	0.209778
Methanoperedens_02368	Lipoate-protein ligase A subunit 1	0	Octanoyltransferase LipM	506.1	Lipoate-protein ligase A	K03800	176.7	2.3e-52	lipoate---protein ligase [EC:6.3.1.20]	13.8572	33.8562	77.9167	73.3576	9.55072	22.461	23.5849	23.1747	19.6928	0.485501	0.630788	0.334434	0.455995
Methanoperedens_02105	hypothetical protein	0	Probable membrane transporter protein y4hK	454.1	Probable membrane transporter protein	K07090	80.4	2.9e-23	uncharacterized protein	0	0	15.8732	10.9836	0	0	4.78533	3.45587	2.0603	0.48541	1.10518	0.255081
Methanoperedens_03259	Beta-lysine N6-acetyltransferase	0	Beta-lysine N(6)-acetyltransferase	565.1	Putative beta-lysine N-acetyltransferase	K21935	365.9	2.9e-110	beta-lysine N6-acetyltransferase [EC:2.3.1.264]	58.5083	60.1888	194.729	187.04	45.3659	44.922	66.311	66.4748	55.7684	0.484762	0.389574	0.180109	0.282173
Methanoperedens_03377	hypothetical protein	1	Thylakoid-associated protein sll1697	721.1	Uncharacterized protein	K07138	52.9	6.2e-15	uncharacterized protein	69.5395	104.132	246.413	279.169	74.0181	106.69	115.19	136.609	108.127	0.484075	0.34612	0.135164	0.225565
Methanoperedens_03225	Tyrosine--tR ligase	0	Tyrosine--tR ligase	637.9	Tyrosine--tR ligase	K01866	281.1	3.8e-84	tyrosyl-tR synthetase [EC:6.1.1.1]	48.3271	26.2385	130.397	141.632	42.9782	22.461	50.9296	54.8874	42.8141	0.482636	0.459892	0.24653	0.35867
Methanoperedens_03550	hypothetical protein	0		181	Uncharacterized protein					10.9446	0	48.1612	30.4939	4.77536	0	9.22886	6.0986	5.0257	0.482325	0.905297	0.379795	0.503444
Methanoperedens_01999	hypothetical protein	0	Uncharacterized protein L143	560.8	Polysaccharide pyruvyl transferase	K13665	283.9	4.4e-85	pyruvyltransferase	31.5864	54.0205	138.995	130.836	23.8768	39.3068	46.1443	43.0968	38.1062	0.48065	0.481745	0.257603	0.371163
Methanoperedens_01779	hypothetical protein	0		578.2	Uncharacterized protein					9.37253	0	27.4956	30.1761	7.16304	0	9.22886	10.1643	6.63906	0.479072	0.843826	0.392398	0.515349
Methanoperedens_03532	50S ribosomal protein L15e	0	50S ribosomal protein L15e	392.9	50S ribosomal protein L15e	K02877	256.8	4.4e-77	large subunit ribosomal protein L15e	784.631	556.9	2138.94	2130.78	427.395	291.993	511.689	531.798	440.719	0.478532	0.252971	0.0518	0.105345
Methanoperedens_00549	hypothetical protein	0		146.4	Uncharacterized protein					12.1007	29.5646	94.6642	78.6686	2.38768	5.61525	8.54524	7.11503	5.9158	0.4699	0.867862	0.385139	0.508441
Methanoperedens_00575	hypothetical protein	0		513.8	Uncharacterized protein					0	7.33945	18.6046	19.5296	0	5.61525	6.49438	6.0986	4.55206	0.469397	0.967967	0.311992	0.433246
Methanoperedens_00778	hypothetical protein	0		141	Uncharacterized protein	K06893	44.6	3.2e-12	uncharacterized protein	0	0	72.1336	41.1052	0	0	5.81076	2.64273	2.11337	0.466066	1.09971	0.261529
Methanoperedens_02532	ATP-dependent R helicase SrmB	0	Uncharacterized ATP-dependent helicase SSO0112	1747.6	Lhr-like helicase	K03724	749.3	2e-225	ATP-dependent helicase Lhr and Lhr-like helicase [EC:3.6.4.-]	10.0432	15.6149	35.4152	43.5848	26.2645	39.3068	40.6753	52.2447	39.6228	0.465415	0.488673	0.278667	0.395289
Methanoperedens_01656	Damage-control phosphatase	0	Damage-control phosphatase AF_1104	558.9	DUF89 domain-containing protein	K09116	290	4e-87	uncharacterized protein	38.9162	29.2555	124.9	130.115	31.0398	22.461	43.7516	39.4376	34.1725	0.463638	0.479544	0.279733	0.396404
Methanoperedens_03504	hypothetical protein	0	Insertion element IS402 uncharacterized 16.2 kDa protein	431.4	Transposase	K07492	211.3	3.4e-63	putative transposase	3.87004	9.45533	8.83035	7.90736	0	0	2.39267	6.30189	2.17364	0.462088	1.10026	0.258745
Methanoperedens_01747	hypothetical protein	0		783.5	Uncharacterized protein					2.15326	0	7.01875	15.9985	2.38768	0	3.41809	7.52161	3.33185	0.461348	0.984461	0.358114	0.480636
Methanoperedens_02222	L-rhamnose 1-dehydrogese (DP(+))	0	3-oxoacyl-[acyl-carrier-protein] reductase FabG	494.2	Uncharacterized protein	K00059	351.1	1.8e-105	3-oxoacyl-[acyl-carrier protein] reductase [EC:1.1.1.100]	3.02517	7.39114	25.6382	21.9148	2.38768	5.61525	8.88705	6.70846	5.89961	0.460686	0.868757	0.392121	0.515279
Methanoperedens_03487	Thiamine-monophosphate kise	0	Uncharacterized protein MJ1416	793.9	Hydrogese maturation factor	K07388	683.3	2.8e-206	hydrogese expression/formation protein	15.5855	9.51965	43.182	52.4712	19.1014	11.2305	23.243	27.4437	20.2547	0.460517	0.587719	0.350946	0.472761
Methanoperedens_03228	Thiol:disulfide interchange protein DsbD	0		497.3	Thiol:disulfide interchange protein	K04084	56.3	3.5e-16	thioredoxin:protein disulfide reductase [EC:1.8.4.16]	135.655	67.9865	319.731	368.919	93.1195	44.922	96.3903	116.077	87.6271	0.459834	0.412967	0.228919	0.339667
Methanoperedens_01388	hypothetical protein	0		114	DH:ubiquinone oxidoreductase chain I-like protein	K05337	41.5	2.7e-11	ferredoxin	147.283	59.9738	340.059	435.439	28.6522	11.2305	29.0538	38.8278	26.9411	0.458442	0.573315	0.346877	0.468507
Methanoperedens_01194	Sensor histidine kise RcsC	0	Sensor kise CckA	2289.2	PAS domain S-box	K13587	570.6	8e-172	two-component system, cell cycle sensor histidine kise and response regulator CckA [EC:2.7.13.3]	21.3682	14.4019	60.0447	58.9889	69.2427	44.922	85.4524	86.1936	71.4527	0.455748	0.368521	0.188878	0.292333
Methanoperedens_03442	Isoleucine--tR ligase	0	Valine--tR ligase	1780.4	Valine--tR ligase	K01873	747.5	4.4e-225	valyl-tR synthetase [EC:6.1.1.9]	219.806	196.176	624.874	648.966	522.902	449.22	652.856	707.031	583.002	0.454456	0.190292	0.0153429	0.0380821
Methanoperedens_00839	hypothetical protein	0		345.5	Uncharacterized protein	K23255	24.3	4.2e-06	archaeal type IV pilus assembly protein PilA	0	0	22.2766	13.601	0	0	4.78533	3.0493	1.95866	0.454452	1.09185	0.279327
Methanoperedens_01430	hypothetical protein	0		214.2	DrsE domain-containing protein	K07235	30.6	4e-08	tR 2-thiouridine synthesizing protein D [EC:2.8.1.-]	15.6209	0	81.4686	33.3678	4.77536	0	10.9379	4.67559	5.09721	0.454407	0.922935	0.393238	0.515773
Methanoperedens_01861	hypothetical protein	0	Putative phosphoribosyl transferase MT0597	846.3	Putative phosphoribosyltransferase	K07100	292.9	1.1e-87	putative phosphoribosyl transferase	0	4.85899	10.3722	13.6682	0	5.61525	5.46895	6.91175	4.49899	0.452898	0.965112	0.323031	0.445143
Methanoperedens_01557	hypothetical protein	0	ATP-dependent D helicase RecG	934.1	Putative transcriptiol regulator with HTH domain	K24459	37.7	1.1e-10	schlafen family member 13 [EC:3.1.-.-]	0	0	4.84932	8.98097	0	0	2.73448	5.28545	2.00498	0.452033	1.09261	0.276513
Methanoperedens_01424	hypothetical protein	0		332.4	Uncharacterized protein					0	0	16.3665	23.8341	0	0	3.07629	4.67559	1.93797	0.450934	1.09043	0.282509
Methanoperedens_02787	hypothetical protein	0		448	Uncharacterized protein					36.251	70.8551	148.886	175.072	23.8768	44.922	43.068	50.8217	40.6721	0.448675	0.493412	0.29754	0.417468
Methanoperedens_03395	hypothetical protein	0		641	Uncharacterized Fe-S center protein	K07138	373.7	2.4e-112	uncharacterized protein	21.9046	47.5713	99.9606	104.431	21.4891	44.922	43.068	46.9592	39.1096	0.448305	0.5056	0.305444	0.42603
Methanoperedens_03335	Photosystem I assembly protein Ycf3	0		491.9	Tetratricopeptide repeat protein	K23424	176	3e-52	protein O-mannosyl-transferase [EC:2.4.1.-]	23.3782	0	49.5323	58.623	28.6522	0	26.6611	32.1193	21.8581	0.447592	0.757688	0.415236	0.539142
Methanoperedens_03244	2-methoxy-6-polyprenyl-1,4-benzoquinol methylase, mitochondrial	0	Uncharacterized methyltransferase YcgJ	522.7	Methylase involved in ubiquinone/mequinone biosynthesis	K03183	101.8	8.4e-30	demethylmequinone methyltransferase / 2-methoxy-6-polyprenyl-1,4-benzoquinol methylase [EC:2.1.1.163 2.1.1.201]	9.87527	32.1699	63.3059	70.9266	7.16304	22.461	20.1668	21.7517	17.8856	0.447408	0.671251	0.383242	0.506644
Methanoperedens_01551	hypothetical protein	0	UPF0175 protein VNG_0066H	187.2	Uncharacterized small protein					8.67827	0	42.4316	38.6873	2.38768	0	5.12714	4.87888	3.09843	0.447016	0.963705	0.38121	0.504898
Methanoperedens_00720	putative ABC transporter ATP-binding protein	0	Macrolide export ATP-binding/permease protein MacB	441	ABC-type antimicrobial peptide transport system, ATPase component	K02003	305.3	1.1e-91	putative ABC transport system ATP-binding protein	3.7682	9.20651	30.707	26.5975	2.38768	5.61525	8.54524	6.70846	5.81416	0.446535	0.864857	0.404958	0.527972
Methanoperedens_01511	Phosphoadenosine phosphosulfate reductase	0	Phosphoadenosine phosphosulfate reductase	510	Thioredoxin-dependent phosophoadenylyl-sulfate reductase	K00390	306.3	6.3e-92	phosphoadenosine phosphosulfate reductase [EC:1.8.4.8 1.8.4.10]	164.67	209.908	565.931	547.243	109.833	134.766	165.778	166.289	144.166	0.446469	0.276085	0.0924468	0.167586
Methanoperedens_00955	hypothetical protein	0		467.2	Uncharacterized protein					7.40646	0	35.006	39.8962	4.77536	0	9.91247	5.08217	4.9425	0.445666	0.910069	0.405563	0.528518
Methanoperedens_00855	Lactate utilization protein B	0	Uncharacterized electron transport protein YkgF	778.5	Uncharacterized protein	K18929	286.3	9e-86	L-lactate dehydrogese complex protein LldF	25.7102	5.23462	62.8537	60.491	28.6522	5.61525	30.7629	30.8996	23.9825	0.444859	0.617077	0.383228	0.506644
Methanoperedens_01195	hypothetical protein	0		622.1	Uncharacterized protein	K18546	42.9	6.5e-12	streptogrisin C [EC:3.4.21.-]	489.054	387.523	1408	1292.88	441.721	336.915	558.517	535.457	468.152	0.444631	0.218294	0.0377344	0.0811003
Methanoperedens_02305	Tetrahydromethanopterin:alpha-L-glutamate ligase	0	Tetrahydromethanopterin:alpha-L-glutamate ligase	585.5	Alpha-L-glutamate ligase, RimK family	K15740	314.3	1.2e-94	tetrahydromethanopterin:alpha-L-glutamate ligase [EC:6.3.2.33]	0	0	10.6593	9.93955	0	0	3.7599	3.65916	1.85477	0.441125	1.08498	0.295483
Methanoperedens_00476	Molybdenum-containing formylmethanofuran dehydrogese 1 subunit C	0	Protein FwdD	255	Formylmethanofuran dehydrogese subunit D	K00203	150.2	5.4e-45	formylmethanofuran dehydrogese subunit D [EC:1.2.7.12]	54.9855	16.7927	163.548	142.988	19.1014	5.61525	24.9521	19.9221	17.3977	0.440852	0.644407	0.397077	0.519367
Methanoperedens_03240	hypothetical protein	0		506.5	Xaa-Pro aminopeptidase	K01271	53.9	2.4e-15	Xaa-Pro dipeptidase [EC:3.4.13.9]	0	0	17.007	12.2758	0	0	5.12714	2.64273	1.94247	0.437921	1.08612	0.290247
Methanoperedens_03424	Tetrahydromethanopterin S-methyltransferase subunit B	0	Tetrahydromethanopterin S-methyltransferase subunit B	194.5	Tetrahydromethanopterin S-methyltransferase subunit B	K00578	95.3	4.2e-28	tetrahydromethanopterin S-methyltransferase subunit B [EC:2.1.1.86]	0	0	41.1836	35.9848	0	0	5.12714	2.64273	1.94247	0.437921	1.08612	0.290247
Methanoperedens_01534	hypothetical protein	0		412.5	Parallel beta-helix repeat (Two copies)	K07218	191.6	3.9e-57	nitrous oxidase accessory protein	0	3.96802	6.88209	14.1786	0	5.61525	4.44352	8.33476	4.59838	0.437664	0.970225	0.326641	0.448321
Methanoperedens_01080	hypothetical protein	0		295.8	Uncharacterized protein					0	0	26.3814	17.3462	0	0	4.44352	3.0493	1.87321	0.43758	1.08429	0.296189
Methanoperedens_02919	putative protein	0		217.6	Uncharacterized protein conserved in archaea	K03051	131.9	2.5e-39	D-directed R polymerase subunit F [EC:2.7.7.6]	205.608	35.8818	505.044	401.008	66.855	11.2305	72.1218	59.7663	52.4934	0.435294	0.617627	0.390626	0.514487
Methanoperedens_03234	Translation initiation factor 5A	0	Translation initiation factor 5A	250	Translation initiation factor 5A	K03263	93.8	2.3e-27	translation initiation factor 5A	139.861	97.6318	392.936	384.736	50.1413	33.6915	61.8675	63.2222	52.2306	0.434776	0.406846	0.248798	0.361413
Methanoperedens_01086	hypothetical protein	0		161	Uncharacterized protein					33.0442	107.645	226.193	200.504	7.16304	22.461	21.534	19.9221	17.77	0.434608	0.670334	0.396256	0.518769
Methanoperedens_00371	hypothetical protein	0		922.2	Membrane protein involved in the export of O-antigen and teichoic acid	K06409	186.2	1.6e-55	stage V sporulation protein B	0	0	6.64146	5.99232	0	0	4.10171	3.25259	1.83858	0.434187	1.08238	0.301199
Methanoperedens_02117	N-alpha-acetyltransferase	0	Uncharacterized N-acetyltransferase MJ1530	302	(SSU ribosomal protein S18P)-alanine acetyltransferase	K03789	145.2	7.1e-43	[ribosomal protein S18]-alanine N-acetyltransferase [EC:2.3.1.266]	0	0	22.4039	17.0224	0	0	4.10171	3.25259	1.83858	0.434187	1.08238	0.301199
Methanoperedens_02804	L-rhamnose 1-dehydrogese (DP(+))	0	Uncharacterized oxidoreductase YoxD	450.7	Uncharacterized protein	K03366	235	1.8e-70	meso-butanediol dehydrogese / (S,S)-butanediol dehydrogese / diacetyl reductase [EC:1.1.1.- 1.1.1.76 1.1.1.304]	0	0	14.6112	15.9585	0	0	4.10171	3.25259	1.83858	0.434187	1.08238	0.301199
Methanoperedens_00746	hypothetical protein	0		332.8	Uncharacterized protein					10.8069	0	26.4196	46.1692	4.77536	0	5.12714	9.35119	4.81342	0.433836	0.904484	0.417884	0.541686
Methanoperedens_02495	tR (guanine(10)-N2)-dimethyltransferase	0	tR (guanine(10)-N2)-dimethyltransferase	675.2	Putative D modification methylase	K07446	381.2	1.1e-114	tR (guanine10-N2)-dimethyltransferase [EC:2.1.1.213]	10.0192	6.11978	30.2093	33.4989	9.55072	5.61525	12.647	14.6366	10.6124	0.43179	0.713199	0.423623	0.547775
Methanoperedens_01858	hypothetical protein	0		780.4	NurA domain-containing protein					40.168	49.0695	138.206	130.569	42.9782	50.5373	64.9438	64.0353	55.6237	0.431234	0.391202	0.233441	0.344934
Methanoperedens_02756	Copper-exporting P-type ATPase B	0	Copper-exporting P-type ATPase B	1424.5	Copper/silver-translocating P-type ATPase	K01533	889	7.2e-268	P-type Cu2+ transporter [EC:7.2.2.9]	43.8571	98.9097	219.933	207.419	93.1195	202.149	205.086	196.578	174.233	0.431019	0.40899	0.245275	0.357577
Methanoperedens_03292	hypothetical protein	0	UPF0150 protein AF_1072	157.5	HicB-like domain-containing protein	K18843	51.3	2.6e-14	antitoxin HicB	41.4048	0	94.4741	126.899	9.55072	0	9.57067	13.2136	8.08375	0.430622	0.813117	0.436669	0.56005
Methanoperedens_00621	hypothetical protein	0		153.7	Uncharacterized protein	K07746	24.6	5.7e-06	antitoxin ParD1/3/4	169.569	55.239	397.963	428.36	35.8152	11.2305	36.9154	41.2672	31.3071	0.428947	0.549007	0.366368	0.489123
Methanoperedens_01225	hypothetical protein	0		881.3	Chemotaxis protein CheC, inhibitor of MCP methylation	K03410	75.9	5.8e-22	chemotaxis protein CheC	1.49158	3.64424	11.1825	10.8052	2.38768	5.61525	7.86162	6.91175	5.69407	0.428123	0.85914	0.422557	0.546895
Methanoperedens_00596	Dihydromethanopterin reductase (acceptor)	0	Dihydromethanopterin reductase (acceptor)	480.3	Archaeoflavoprotein, MJ0208 family	K18853	283.9	1.8e-85	dihydromethanopterin reductase (acceptor) [EC:1.5.99.15]	3.57979	26.2385	42.0072	55.1898	2.38768	16.8458	12.3051	16.8728	12.1028	0.42505	0.8021	0.417087	0.541297
Methanoperedens_01755	hypothetical protein	0		389.8	Uncharacterized protein					0	0	10.2635	21.7236	0	0	2.39267	5.28545	1.91953	0.423753	1.0816	0.300013
Methanoperedens_00886	hypothetical protein	0		129.8	Uncharacterized protein					0	0	57.657	30.5089	0	0	4.78533	2.64273	1.85701	0.423041	1.07948	0.306608
Methanoperedens_01099	Coenzyme A biosynthesis bifunctiol protein CoaBC	0	Uncharacterized protein MJ0730	382.1	Archaeoflavoprotein AfpA	K18853	161.3	5e-48	dihydromethanopterin reductase (acceptor) [EC:1.5.99.15]	22.6092	11.0478	60.4315	70.5533	11.9384	5.61525	14.0142	17.2794	12.2118	0.422726	0.689126	0.428448	0.55175
Methanoperedens_02428	hypothetical protein	0		428.7	Putative RAMP superfamily protein probably involved in D repair	K09002	81.1	1.8e-23	CRISPR-associated protein Csm3	0	9.90134	25.0987	23.3355	0	5.61525	6.49438	5.28545	4.34877	0.422405	0.956142	0.348251	0.469794
Methanoperedens_02307	Protein pelota	0	Protein pelota homolog	669.1	Protein pelota homolog	K06965	301.6	1.8e-90	protein pelota	14.7705	0	34.5045	36.5811	14.3261	0	14.6978	16.2629	11.3217	0.422194	0.763826	0.444001	0.566642
Methanoperedens_00408	hypothetical protein	0		149.8	Uncharacterized protein					0	0	33.3391	34.1968	0	0	3.41809	3.65916	1.76931	0.419876	1.07645	0.316326
Methanoperedens_02927	GTP 3',8-cyclase	0	Uncharacterized protein MJ0103	676	Putative Fe-S oxidoreductase	K06935	437.2	8e-132	uncharacterized protein	38.817	18.9676	129.902	122.092	35.8152	16.8458	52.6387	31.7127	34.2531	0.419427	0.56711	0.384122	0.507571
Methanoperedens_03323	Protease HtpX	0	Protease HtpX homolog 2	543.5	Protease HtpX homolog	K03799	280.6	3.6e-84	heat shock protein HtpX [EC:3.4.24.-]	29.1237	14.2311	82.5905	87.0955	23.8768	11.2305	29.7374	27.4437	23.0721	0.419328	0.560222	0.382137	0.505654
Methanoperedens_01937	L-rhamnose 1-dehydrogese (DP(+))	0	3-oxoacyl-[acyl-carrier-protein] reductase FabG	491.1	Uncharacterized protein	K00059	345.6	8.8e-104	3-oxoacyl-[acyl-carrier protein] reductase [EC:1.1.1.100]	6.05034	0	24.6521	15.7337	4.77536	0	8.54524	5.48874	4.70233	0.41928	0.893268	0.433964	0.557336
Methanoperedens_01894	Isochorismate synthase MenF	0	Anthranilate synthase component 1 2	1009.6	Anthranilate synthase component 1	K01657	624.1	6.8e-188	anthranilate synthase component I [EC:4.1.3.27]	52.4284	49.5846	136.716	175.292	74.0181	67.383	84.7687	113.231	84.8501	0.417499	0.373545	0.231635	0.342838
Methanoperedens_00958	hypothetical protein	0		141	Uncharacterized protein					12.6345	154.344	288.285	267.539	2.38768	28.0763	23.9267	23.1747	19.3913	0.416188	0.795645	0.423526	0.547775
Methanoperedens_00725	hypothetical protein	0	Uncharacterized protein MJ1295	425.6	PHP family phosphohydrolase, histidinol phosphatase	K04477	99.1	6e-29	putative hydrolase	55.9446	68.3422	208.408	168.492	33.4275	39.3068	54.6895	46.1461	43.3925	0.416103	0.443563	0.299196	0.41917
Methanoperedens_02068	hypothetical protein	0	Putative methyltransferase mtx subunit X	518.5	Putative methanogen marker protein 4	K00625	37	4.3e-10	phosphate acetyltransferase [EC:2.3.1.8]	3.18203	0	17.6327	11.2301	2.38768	0	5.81076	3.86245	3.01522	0.415684	0.95991	0.406724	0.529615
Methanoperedens_01135	hypothetical protein	0		258.1	Transposase					5.05382	0	14.8261	12.2036	0	0	3.7599	3.25259	1.75312	0.415143	1.07463	0.321066
Methanoperedens_01807	hypothetical protein	0		146.7	TRASH domain-containing protein	K16242	34.1	2.1e-09	phenol/toluene 2-monooxygese (DH) P3/A3 [EC:1.14.13.244 1.14.13.243]	13.4242	98.3945	175.03	179.533	2.38768	16.8458	13.6724	14.6366	11.8856	0.414286	0.792049	0.428417	0.55175
Methanoperedens_02593	hypothetical protein	0		601.3	CRISPR-associated protein Cas7/Cst2/DevR, subtype I-B/TNEAP	K19075	207.2	7e-62	CRISPR-associated protein Cst2	52.8279	6.79315	116.007	113.104	45.3659	5.61525	43.7516	44.5198	34.8131	0.412619	0.645326	0.426992	0.550626
Methanoperedens_02526	hypothetical protein	0		183.3	Uncharacterized protein					38.1844	23.3231	289.383	248.243	9.55072	5.61525	31.7883	3.45587	12.6025	0.412186	0.898303	0.423838	0.547803
Methanoperedens_03551	hypothetical protein	0		588.2	Uncharacterized protein					11.0715	27.05	60.629	51.0014	11.9384	28.0763	28.712	25.2076	23.4836	0.411412	0.595449	0.396409	0.518769
Methanoperedens_02490	hypothetical protein	0		140.2	Uncharacterized protein					49.8057	0	117.701	138.77	9.55072	0	9.91247	12.1972	7.9151	0.410962	0.80466	0.456422	0.578842
Methanoperedens_00407	hypothetical protein	0		852	Uncharacterized protein					44.5617	74.0341	161.522	181.106	59.692	95.4593	95.023	108.149	89.5807	0.410063	0.370033	0.231781	0.342838
Methanoperedens_00223	Phosphoglycolate phosphatase	0	Phosphoglycolate phosphatase	443	Phosphoglycolate phosphatase	K22223	244.6	1.8e-73	phosphoglycolate phosphatase [EC:3.1.3.18]	72.5504	18.6585	146.87	183.7	45.3659	11.2305	40.3335	52.6513	37.3953	0.409971	0.577951	0.402348	0.525051
Methanoperedens_01353	hypothetical protein	0		597	ABC-type transport system involved in multi-copper enzyme maturation, permease component	K01992	24.3	2.5e-06	ABC-2 type transport system permease protein	0	0	8.64347	8.37328	0	0	3.41809	3.45587	1.71849	0.407749	1.07174	0.329259
Methanoperedens_02572	hypothetical protein	0	Protein arginine methyltransferase NDUFAF7 homolog, mitochondrial	760.8	Uncharacterized protein	K18164	225	4.8e-67	DH dehydrogese [ubiquinone] 1 alpha subcomplex assembly factor 7	6.98495	0	18.9735	19.8941	7.16304	0	8.54524	9.1479	6.21404	0.40752	0.833147	0.458064	0.579888
Methanoperedens_02429	hypothetical protein	0		517.7	Uncharacterized protein	K19076	56.1	6.3e-16	CRISPR-associated protein Cmr2	13.5834	0	27.6728	42.8924	9.55072	0	8.54524	13.8235	7.97986	0.407337	0.821269	0.458286	0.579909
Methanoperedens_01254	Orotidine 5'-phosphate decarboxylase	0	Orotidine 5'-phosphate decarboxylase	422.9	Orotidine 5'-phosphate decarboxylase	K01591	173.5	1.7e-51	orotidine-5'-phosphate decarboxylase [EC:4.1.1.23]	19.5261	19.0826	61.1014	69.6371	11.9384	11.2305	16.4069	19.5155	14.7728	0.406845	0.641137	0.428318	0.55175
Methanoperedens_03489	hypothetical protein	0		416	Peptidase_C39_2 domain-containing protein					55.2918	62.349	170.524	186.446	31.0398	33.6915	42.0426	47.9757	38.6874	0.406831	0.454455	0.320327	0.442869
Methanoperedens_02254	hypothetical protein	0		358.6	Uncharacterized protein					0	0	11.3725	17.0116	0	0	2.73448	4.26902	1.75087	0.405801	1.07218	0.327073
Methanoperedens_03493	hypothetical protein	0	Uncharacterized protein MJ1154	1201	HD superfamily phosphohydrolase	K06885	288.1	3.1e-86	uncharacterized protein	4.26024	0	12.0351	11.6062	7.16304	0	8.88705	8.74133	6.19785	0.404582	0.832304	0.460988	0.582031
Methanoperedens_01469	hypothetical protein	0	Dihydrolipoyllysine-residue acetyltransferase component of pyruvate dehydrogese complex	674.5	Pyruvate/2-oxoglutarate dehydrogese complex, dihydrolipoamide acyltransferase component	K00627	525.7	4e-158	pyruvate dehydrogese E2 component (dihydrolipoamide acetyltransferase) [EC:2.3.1.12]	67.2712	46.9594	186.072	172.794	83.5688	56.1525	101.517	98.3908	84.9074	0.404376	0.343905	0.21554	0.323538
Methanoperedens_00473	hypothetical protein	0		554.7	Uncharacterized protein					6.43557	0	15.733	25.1032	4.77536	0	5.12714	8.53804	4.61014	0.402422	0.893632	0.448856	0.571289
Methanoperedens_02667	putative metalloprotease	0		265	Proteasome Rpn11 subunit JAMM motif	K20110	33.9	4.1e-09	desampylase [EC:3.4.19.15]	26.4354	0	96.9398	82.2476	9.55072	0	15.3814	7.52161	8.11344	0.401845	0.83941	0.460172	0.5817
Methanoperedens_00648	hypothetical protein	0		147.5	Uncharacterized protein					0	0	41.6288	38.818	0	0	3.7599	3.0493	1.7023	0.401664	1.06963	0.335137
Methanoperedens_01928	hypothetical protein	0		262.7	Death-on-curing family protein	K07341	88.3	1.4e-25	death on curing protein	0	0	23.3374	21.7616	0	0	3.7599	3.0493	1.7023	0.401664	1.06963	0.335137
Methanoperedens_00295	hypothetical protein	0		136	Uncharacterized protein					0	0	67.8905	21.7616	0	0	5.46895	2.03287	1.87545	0.400521	1.0734	0.319575
Methanoperedens_00944	R 2',3'-cyclic phosphodiesterase	0	R 2',3'-cyclic phosphodiesterase	356.7	R 2',3'-cyclic phosphodiesterase	K01975	113.6	2.4e-33	R 2',3'-cyclic 3'-phosphodiesterase [EC:3.1.4.58]	43.1974	58.6336	162.71	140.863	21.4891	28.0763	35.5482	32.5259	29.4099	0.398864	0.505497	0.366734	0.489382
Methanoperedens_01898	hypothetical protein	0		271.6	Formylmethanofuran dehydrogese subunit D	K00203	133	1.1e-39	formylmethanofuran dehydrogese subunit D [EC:1.2.7.12]	0	0	14.2053	26.5975	0	0	2.39267	4.67559	1.76707	0.398496	1.07066	0.330276
Methanoperedens_01516	hypothetical protein	0	Uncharacterized protein MJECL04	947.2	Putative ATPase (AAA+ superfamily)	K06921	353.6	5.2e-106	uncharacterized protein	0	0	4.70669	6.70525	0	0	2.73448	4.06573	1.70005	0.395847	1.06822	0.338967
Methanoperedens_01925	hypothetical protein	0	Uncharacterized protein AF_1059	115.9	Uncharacterized protein					0	0	35.006	49.8703	0	0	2.73448	4.06573	1.70005	0.395847	1.06822	0.338967
Methanoperedens_03207	L-fuculose phosphate aldolase	0		363.6	L-fuculose phosphate aldolase	K01628	154.2	9.9e-46	L-fuculose-phosphate aldolase [EC:4.1.2.17]	0	11.4081	33.484	18.2135	0	5.61525	7.51981	4.26902	4.35102	0.395638	0.956243	0.364891	0.48761
Methanoperedens_02529	hypothetical protein	6		668.7	Nitrite reductase (cytochrome; ammonia-forming)	K10535	42.9	4.5e-12	hydroxylamine dehydrogese [EC:1.7.2.6]	78.1044	85.5426	247.566	232.624	69.2427	72.9983	96.3903	94.7316	83.3407	0.395433	0.328084	0.203853	0.309931
Methanoperedens_02744	Sulfhydrogese 1 subunit gamma	0	Sulfhydrogese 1 subunit gamma	578.9	2-polyprenylphenol hydroxylase-like oxidoreductase	K17995	352.6	1.9e-106	sulfhydrogese subunit gamma (sulfur reductase) [EC:1.12.98.4]	3.04663	0	8.93771	18.1089	2.38768	0	3.07629	6.50517	2.99228	0.394192	0.963736	0.421525	0.545808
Methanoperedens_00622	Pyridoxal 5'-phosphate synthase subunit PdxS	0	Pyridoxal 5'-phosphate synthase subunit PdxS	566.6	Pyridoxal 5'-phosphate synthase subunit PdxS	K06215	514.9	2.2e-155	pyridoxal 5'-phosphate synthase pdxS subunit [EC:4.3.3.6]	152.291	84.2441	394.315	351.194	126.547	67.383	143.902	133.763	117.899	0.392681	0.359934	0.248064	0.360531
Methanoperedens_03350	hypothetical protein	0	Uncharacterized protein MJ0683	555.8	D repair photolyase	K22585	66.1	4.2e-19	D repair protein NreA	12.5883	7.68895	42.0585	38.581	9.55072	5.61525	14.0142	12.1972	10.3443	0.391448	0.709665	0.465364	0.586512
Methanoperedens_01552	hypothetical protein	0		167.9	Uncharacterized protein	K07066	24.6	3.7e-06	uncharacterized protein	0	0	38.1884	23.575	0	0	4.10171	2.64273	1.68611	0.391215	1.06645	0.344158
Methanoperedens_01661	Aerobic nitric oxide reductase flavorubredoxin	0		528.1	Putative flavoprotein	K12264	75.5	6.5e-22	aerobic nitric oxide reductase flavorubredoxin	0	7.98131	18.102	17.5968	0	5.61525	5.81076	5.28545	4.17787	0.391002	0.947464	0.377065	0.500343
Methanoperedens_00615	hypothetical protein	0		109	Uncharacterized protein					76.7097	74.9673	235.041	270.724	11.9384	11.2305	16.065	19.3122	14.6365	0.390847	0.641135	0.446262	0.568253
Methanoperedens_01657	D polymerase	0	D polymerase delta catalytic subunit	1695.2	D polymerase	K02319	703	1.1e-211	D polymerase, archaea type [EC:2.7.7.7]	21.9527	12.1898	58.2214	53.195	52.5289	28.0763	61.1839	58.14	49.9823	0.389618	0.430342	0.324724	0.446339
Methanoperedens_00642	Calcium-gated potassium channel MthK	0	Potassium channel protein 1	422.5	K+ transport system, D-binding component	K03499	104.2	1.4e-30	trk system potassium uptake protein	0	0	14.0024	10.1554	0	0	3.7599	2.84601	1.65148	0.388093	1.06482	0.349981
Methanoperedens_01082	hypothetical protein	0		1443.3	Type IV secretory pathway, VirD4 component	K03205	114	1.3e-33	type IV secretion system protein VirD4 [EC:7.4.2.8]	19.2685	16.6154	65.3939	46.9491	40.5905	33.6915	60.5003	45.1297	44.978	0.387943	0.455133	0.344999	0.466522
Methanoperedens_01863	hypothetical protein	0		299.7	Molecular chaperone (Small heat shock protein)	K13993	57.9	2.5e-16	HSP20 family protein	67.3842	13.7195	140.939	164.8	28.6522	5.61525	26.3193	32.1193	23.1765	0.3873	0.625526	0.449974	0.571686
Methanoperedens_01335	hypothetical protein	0		194.9	Uncharacterized protein					0	0	13.0864	43.252	0	0	1.70905	5.89531	1.90109	0.386561	1.0705	0.325657
Methanoperedens_00781	hypothetical protein	0	Glutamate synthase large subunit-like protein	1024.2	Archaeal glutamate synthase [DPH]	K22083	511.2	5.6e-154	methylamine---glutamate N-methyltransferase subunit C [EC:2.1.1.21]	0	0	5.04087	6.06423	0	0	3.07629	3.45587	1.63304	0.386418	1.06403	0.35294
Methanoperedens_02058	hypothetical protein	0		407.9	CAAX amino termil protease family	K07052	53.4	4.2e-15	uncharacterized protein	3.39585	0	13.2829	15.1385	2.38768	0	4.10171	4.87888	2.84207	0.385713	0.949698	0.43885	0.562339
Methanoperedens_00888	hypothetical protein	0		662.9	Uncharacterized protein					0	0	5.80411	7.85522	0	0	2.73448	3.86245	1.64923	0.385658	1.06432	0.351552
Methanoperedens_00031	hypothetical protein	0		229.6	Uncharacterized protein					6.87319	16.7927	53.7693	56.1739	2.38768	5.61525	8.20343	5.89531	5.52542	0.384184	0.856602	0.463518	0.584964
Methanoperedens_03486	Coenzyme F420:L-glutamate ligase	0	Coenzyme F420:L-glutamate ligase	490.7	Coenzyme F420:L-glutamate ligase	K12234	268.9	1.8e-80	coenzyme F420-0:L-glutamate ligase / coenzyme F420-1:gamma-L-glutamate ligase [EC:6.3.2.31 6.3.2.34]	3.39585	41.4839	87.4459	76.3232	2.38768	28.0763	27.0029	19.109	19.144	0.383549	0.79865	0.457877	0.579888
Methanoperedens_02621	Isopentenyl-diphosphate delta-isomerase	0	Isopentenyl-diphosphate delta-isomerase	718	Isopentenyl-diphosphate delta-isomerase	K11517	63.2	4.8e-18	(S)-2-hydroxy-acid oxidase [EC:1.1.3.15]	244.473	244.609	703.536	711.429	250.706	241.456	316.857	334.407	285.857	0.383538	0.210167	0.06252	0.122408
Methanoperedens_02193	hypothetical protein	0		190.7	Uncharacterized protein					22.2194	54.2866	115.882	111.434	7.16304	16.8458	16.4069	16.4662	14.2205	0.383062	0.674685	0.457672	0.579888
Methanoperedens_01243	hypothetical protein	0	Flagella accessory protein J	1031.2	Archaeal flagella assembly protein J	K07333	264	5.8e-79	archaeal flagellar protein FlaJ	0	0	5.06416	4.32871	0	0	3.41809	3.0493	1.61685	0.382631	1.06263	0.357629
Methanoperedens_02632	D gyrase subunit B	0	D gyrase subunit B	1533.1	D gyrase subunit B	K02470	1105.2	0	D gyrase subunit B [EC:5.6.2.2]	131.244	140.119	395.447	381.652	284.134	291.993	375.99	378.926	332.761	0.380968	0.196347	0.0480075	0.0986937
Methanoperedens_01804	hypothetical protein	0	Bifunctiol homocysteine S-methyltransferase/5,10-methylenetetrahydrofolate reductase	573.9	Methylenetetrahydrofolate reductase (D(P)H)	K24042	325.2	1.5e-97	methionine synthase / methylenetetrahydrofolate reductase(DPH) [EC:2.1.1.13 1.5.1.20]	11.7692	14.3773	48.9125	39.3497	9.55072	11.2305	17.4323	13.8235	13.0093	0.380685	0.670821	0.464718	0.585958
Methanoperedens_03538	hypothetical protein	0		152.5	hypothetical protein					0	0	12.9824	22.1939	0	0	2.39267	4.26902	1.66542	0.380549	1.06352	0.353302
Methanoperedens_03479	Acetate--CoA ligase [ADP-forming] II subunit beta	0	Acetate--CoA ligase [ADP-forming] II subunit beta	420.6	ATP-grasp domain protein	K22224	285	7.1e-86	acetate---CoA ligase (ADP-forming) subunit beta [EC:6.2.1.13]	54.9228	28.7546	147.057	132.623	33.4275	16.8458	39.3081	36.9982	31.6449	0.379901	0.499397	0.391717	0.515207
Methanoperedens_01938	3-ketoacyl-CoA thiolase	0	Acetyl-CoA acetyltransferase	776.5	Acetyl-CoA acetyltransferase	K00626	569.4	1.8e-171	acetyl-CoA C-acetyltransferase [EC:2.3.1.9]	6.55839	10.6824	30.6414	24.7702	7.16304	11.2305	14.6978	12.4005	11.373	0.377694	0.701475	0.47313	0.594714
Methanoperedens_02811	D-inositol-3-phosphate glycosyltransferase	0	Lipopolysaccharide core biosynthesis glycosyltransferase LpsE	766.5	Glycosyltransferase	K19002	225.5	2.7e-67	1,2-diacylglycerol 3-alpha-glucosyltransferase [EC:2.4.1.337]	0	0	20.1098	20.3725	0	0	9.22886	0.813147	2.5105	0.376839	1.07726	0.287562	0.405072
Methanoperedens_01360	hypothetical protein	0		221.1	Putative nucleotidyltransferase	K07076	58.8	1.4e-16	uncharacterized protein	0	0	29.4788	16.7984	0	0	4.10171	2.43944	1.63529	0.376534	1.06154	0.360247
Methanoperedens_00169	hypothetical protein	0		85.1	Uncharacterized protein					0	0	50.9179	65.2847	0	0	2.73448	3.65916	1.59841	0.37522	1.0605	0.364876
Methanoperedens_02004	hypothetical protein	0		325.5	Uncharacterized protein					0	0	13.0255	16.7007	0	0	2.73448	3.65916	1.59841	0.37522	1.0605	0.364876
Methanoperedens_02053	D-inositol-3-phosphate glycosyltransferase	0	Uncharacterized glycosyltransferase MJ1059	794.7	Glycosyltransferase	K00754	172.6	3.4e-51	L-malate glycosyltransferase [EC:2.4.1.-]	0	0	5.72989	7.34662	0	0	2.73448	3.65916	1.59841	0.37522	1.0605	0.364876
Methanoperedens_00661	Small archaeal modifier protein 3	0	Small archaeal modifier protein 1	186.8	MoaD family protein	K03636	89.1	7e-26	sulfur-carrier protein	0	0	27.6971	28.0589	0	0	3.07629	3.25259	1.58222	0.374764	1.05991	0.367253
Methanoperedens_00290	D(P)H-quinone oxidoreductase subunit 1, chloroplastic	0	Formate hydrogenlyase subunit 4	567.4	Formate hydrogenlyase subunit 4	K12138	274.7	1.9e-82	hydrogese-4 component C [EC:1.-.-.-]	0	0	12.4072	12.1204	0	0	4.78533	2.03287	1.70455	0.374629	1.06268	0.354247
Methanoperedens_01359	hypothetical protein	0		91.3	Uncharacterized protein					0	0	66.9681	45.1001	0	0	3.7599	2.64273	1.60066	0.374295	1.06018	0.365735
Methanoperedens_03513	hypothetical protein	0		468.8	UbiA prenyltransferase family protein					0	0	12.9434	12.0694	0	0	3.7599	2.64273	1.60066	0.374295	1.06018	0.365735
Methanoperedens_01257	Toxin RelE3	0	Toxin RelE3	166.4	Cytotoxic translatiol repressor of toxin-antitoxin stability system	K06218	57.7	4.2e-16	mR interferase RelE/StbE	20.4559	24.9891	90.0155	77.8926	4.77536	5.61525	9.22886	8.33476	6.98856	0.373119	0.787847	0.488172	0.610376
Methanoperedens_01155	Acetate--CoA ligase [ADP-forming] II	0	Uncharacterized protein YccU	261.2	Putative CoA-binding protein	K06929	212	1.5e-63	uncharacterized protein	33.0442	32.2936	124.945	152.219	11.9384	11.2305	19.8249	15.2465	14.5601	0.372824	0.646125	0.468087	0.589158
Methanoperedens_00884	hypothetical protein	0		357.5	RibD_C domain-containing protein					4.36116	0	31.2744	16.2015	2.38768	0	6.15257	3.0493	2.89739	0.372495	0.956328	0.444953	0.567085
Methanoperedens_01490	hypothetical protein	0		65.1	Transposase					0	0	28.8285	46.9367	0	0	2.39267	4.06573	1.6146	0.371282	1.06003	0.365793
Methanoperedens_03474	30S ribosomal protein S15	0	30S ribosomal protein S15	302	30S ribosomal protein S15	K02956	39.7	9.7e-11	small subunit ribosomal protein S15	297.614	288.109	971.932	740.558	126.547	117.92	181.501	144.334	142.575	0.369861	0.30465	0.20458	0.310869
Methanoperedens_03386	hypothetical protein	0		689.1	Putative dehydrogese	K18855	81.8	9.2e-24	UDP-N-acetylglucosamine 3-dehydrogese [EC:1.1.1.374]	113.377	55.401	279.227	251.779	107.446	50.5373	116.215	109.368	95.8916	0.369417	0.396409	0.318568	0.441297
Methanoperedens_03227	Cytochrome c biogenesis protein CcsA	0	Cytochrome c-type biogenesis protein CcmF	1422.1	Cytochrome c biogenesis factor	K02198	456.9	2.8e-137	cytochrome c-type biogenesis protein CcmF	140.042	206.378	429.311	551.012	300.848	426.759	405.044	540.133	418.196	0.368739	0.299008	0.195634	0.300332
Methanoperedens_01722	hypothetical protein	0		1631.3	Putative Ig domain-containing protein	K24498	23.2	1.4e-06	sortilin-related receptor	2.09804	5.12597	10.9421	11.6912	4.77536	11.2305	10.9379	11.9939	9.73442	0.368566	0.743593	0.486234	0.608221
Methanoperedens_02544	Riboflavin synthase	0	Riboflavin synthase	307.4	Riboflavin synthase	K00794	31.2	2.8e-08	6,7-dimethyl-8-ribityllumazine synthase [EC:2.5.1.78]	22.1716	13.5425	79.4976	70.0115	9.55072	5.61525	15.0396	10.7742	10.2449	0.367945	0.71957	0.49234	0.614775
Methanoperedens_01573	hypothetical protein	0		95.5	Uncharacterized protein					15.9102	0	46.6747	85.703	2.38768	0	3.07629	5.89531	2.83982	0.367523	0.954463	0.451598	0.573237
Methanoperedens_01973	hypothetical protein	0		279.3	Nucleotidyltransferase family protein	K07076	42.2	1.6e-11	uncharacterized protein	6.09325	14.8871	43.6955	33.9542	2.38768	5.61525	7.51981	6.0986	5.40534	0.366867	0.850691	0.482699	0.604866
Methanoperedens_01520	KEOPS complex subunit Bud32	0	Probable bifunctiol tR threonylcarbamoyladenosine biosynthesis protein	372.1	Non-specific serine/threonine protein kise	K15904	218.2	3.6e-65	bifunctiol N6-L-threonylcarbamoyladenine synthase / protein kise Bud32 [EC:2.3.1.234 2.7.11.1]	26.8484	0	61.2606	59.8443	14.3261	0	14.356	14.6366	10.8297	0.366761	0.758391	0.50231	0.62295
Methanoperedens_03345	(5-formylfuran-3-yl)methyl phosphate synthase	0	(5-formylfuran-3-yl)methyl phosphate synthase	458	(5-formylfuran-3-yl)methyl phosphate synthase	K09733	235.7	1.3e-70	(5-formylfuran-3-yl)methyl phosphate synthase [EC:4.2.3.153]	29.4987	45.0447	97.3558	117.805	19.1014	28.0763	27.6866	34.9653	27.4574	0.365986	0.535409	0.424524	0.54819
Methanoperedens_01664	hypothetical protein	0		256.9	Uncharacterized protein	K07074	32.8	8.8e-09	uncharacterized protein	0	16.9281	29.3599	39.8962	0	5.61525	4.44352	6.30189	4.09017	0.363825	0.944359	0.400042	0.522763
Methanoperedens_00039	hypothetical protein	0	Thermonuclease	378.3	Micrococcal nuclease-like nuclease (Fragment)	K01174	115.3	6.4e-34	micrococcal nuclease [EC:3.1.31.1]	0	0	10.6798	10.1431	0	0	3.07629	3.0493	1.5314	0.362815	1.05588	0.38243
Methanoperedens_02426	hypothetical protein	0		330.1	Uncharacterized protein					0	0	14.8261	14.081	0	0	3.07629	3.0493	1.5314	0.362815	1.05588	0.38243
Methanoperedens_02835	hypothetical protein	0		135.6	Uncharacterized protein	K09791	63.4	3.3e-18	uncharacterized protein	0	0	38.1884	36.2693	0	0	3.07629	3.0493	1.5314	0.362815	1.05588	0.38243
Methanoperedens_00878	Modification methylase MjaI	0	Modification methylase MjaI	213	Modification methylase	K24451	134.4	1.1e-39	modification methylase	8.59149	0	33.6058	35.1087	2.38768	0	4.10171	4.47231	2.74043	0.362561	0.944123	0.463735	0.584978
Methanoperedens_03549	hypothetical protein	0		208.8	hypothetical protein					4.77305	0	15.5582	23.0512	2.38768	0	3.41809	5.28545	2.77281	0.362469	0.948488	0.460784	0.582031
Methanoperedens_01872	hypothetical protein	0		880.6	Uncharacterized protein					0	0	4.47566	6.92263	0	0	2.39267	3.86245	1.56378	0.361732	1.05658	0.378994
Methanoperedens_03102	hypothetical protein	0		242.7	Uncharacterized protein					0	0	25.0789	13.1003	0	0	4.10171	2.23615	1.58447	0.361635	1.05682	0.377319
Methanoperedens_01728	hypothetical protein	0		1871.3	Fibronectin type-III domain-containing protein	K06872	29.6	7e-08	uncharacterized protein	1.49808	1.83006	6.34809	7.37402	4.77536	5.61525	8.88705	8.33476	6.9031	0.358523	0.785878	0.504043	0.623896
Methanoperedens_02650	hypothetical protein	0		277.7	Uncharacterized protein	K03442	23.8	4e-06	small conductance mechanosensitive channel	153.55	80.3904	347.975	376.892	100.283	50.5373	99.8084	112.824	90.8631	0.3575	0.390312	0.327552	0.449329
Methanoperedens_00620	Bifunctiol F420 biosynthesis protein FbiB	0	Coenzyme F420:L-glutamate ligase	495.4	Coenzyme F420-0 gamma-glutamyl ligase	K12234	220.2	1.1e-65	coenzyme F420-0:L-glutamate ligase / coenzyme F420-1:gamma-L-glutamate ligase [EC:6.3.2.31 6.3.2.34]	0	0	26.2545	35.5326	0	0	8.20343	0.813147	2.25414	0.356371	1.06767	0.31901	0.441478
Methanoperedens_00011	hypothetical protein	0		485	Uncharacterized protein					14.2008	8.6739	39.3456	47.4798	9.55072	5.61525	11.6215	13.4169	10.0511	0.352705	0.707764	0.508762	0.627274
Methanoperedens_02558	hypothetical protein	0	Sulfur carrier protein CysO	204.1	MoaD family protein	K03636	68.8	1.2e-19	sulfur-carrier protein	231.309	262.385	659.729	742.684	66.855	72.9983	83.7433	97.7809	80.3444	0.352474	0.347406	0.281478	0.397884
Methanoperedens_03349	hypothetical protein	0	Uncharacterized protein MJ0703	441.4	HisA/hisF family protein	K01814	130	2.7e-38	phosphoribosylformimino-5-aminoimidazole carboxamide ribotide isomerase [EC:5.3.1.16]	22.3156	27.2608	59.4042	92.5731	14.3261	16.8458	16.7487	27.2404	18.7902	0.350891	0.627687	0.486211	0.608221
Methanoperedens_00743	hypothetical protein	0		321.2	DUF4440 domain-containing protein	K06893	24.9	3.3e-06	uncharacterized protein	0	0	15.7527	12.9663	0	0	3.07629	2.84601	1.48057	0.350604	1.05197	0.398525
Methanoperedens_03347	hypothetical protein	0		120.9	type II toxin-antitoxin system HicA family toxin					14.5618	0	66.4521	48.6869	2.38768	0	4.78533	3.65916	2.70804	0.350447	0.942926	0.476021	0.597554
Methanoperedens_02069	hypothetical protein	0	tR (guanine(37)-N1)-methyltransferase Trm5b	547.7	Putative methyltransferase	K15429	194.2	8.5e-58	tR (guanine37-N1)-methyltransferase [EC:2.1.1.228]	3.20578	7.8324	15.6743	24.4141	2.38768	5.61525	5.12714	8.33476	5.36621	0.348421	0.857195	0.499447	0.621369
Methanoperedens_02299	hypothetical protein	0		209.9	Putative nucleic acid-binding protein, contains PIN domain	K07065	73.9	2.5e-21	uncharacterized protein	16.3647	19.9913	64.011	65.3538	4.77536	5.61525	8.20343	8.74133	6.83384	0.347069	0.784892	0.516785	0.634347
Methanoperedens_03069	hypothetical protein	0		185.7	Uncharacterized protein					8.50642	124.698	219.048	200.666	2.38768	33.6915	27.0029	25.8174	22.2249	0.346571	0.792028	0.500468	0.621369
Methanoperedens_00691	hypothetical protein	0		696.4	Mrr_cat domain-containing protein	K07448	66.9	3.6e-19	restriction system protein	52.448	48.8159	167.703	131.286	50.1413	44.922	70.4128	57.3269	55.7007	0.346197	0.40335	0.353077	0.47518
Methanoperedens_00506	Aerobic glycerol-3-phosphate dehydrogese subunit A1	0	Glycerol-3-phosphate dehydrogese	1115.1	Glycerol-3-phosphate dehydrogese	K00111	411.9	8.6e-124	glycerol-3-phosphate dehydrogese [EC:1.1.5.3]	7.79627	3.80959	22.3632	21.4325	11.9384	5.61525	15.0396	13.8235	11.6042	0.345812	0.678875	0.512244	0.630745
Methanoperedens_01608	GDP-L-fucose synthase	0	Probable GDP-L-fucose synthase 1	169.5	Uncharacterized protein	K02377	80.9	1.6e-23	GDP-L-fucose synthase [EC:1.1.1.271]	31.8203	0	76.0625	126.092	7.16304	0	7.51981	8.74133	5.85604	0.345601	0.827392	0.522115	0.639844
Methanoperedens_01965	SAMP-activating enzyme E1	0	SAMP-activating enzyme E1	550.1	Dinucleotide-utilizing enzyme possibly involved in molybdopterin or thiamin biosynthesis	K22837	409.5	9.1e-124	SAMP-activating enzyme [EC:2.7.7.100]	219.56	310.975	691.823	759.506	164.75	224.61	227.987	261.223	219.643	0.344778	0.275118	0.191606	0.295845
Methanoperedens_03190	D-inositol-3-phosphate glycosyltransferase	0	Uncharacterized glycosyltransferase MJ1607	775.8	Glycosyltransferase	K03867	177.4	6.8e-53	UDP-glucose:tetrahydrobiopterin glucosyltransferase [EC:2.4.1.-]	0	0	7.29292	4.98703	0	0	3.41809	2.43944	1.46438	0.343195	1.05001	0.40685
Methanoperedens_01765	hypothetical protein	0		1471.8	Putative Ser protein kise	K07180	208.9	2.2e-62	serine protein kise	84.2982	73.3551	241.655	213.638	174.301	145.997	219.442	200.644	185.096	0.342434	0.254456	0.1664	0.266108
Methanoperedens_00924	Citrate synthase	0	Citrate synthase 2	780.8	Citrate synthase	K01647	379.9	5e-114	citrate synthase [EC:2.3.3.1]	63.722	53.685	186.221	159.177	69.2427	56.1525	88.8705	79.2818	73.3869	0.342277	0.353438	0.305159	0.425842
Methanoperedens_01284	hypothetical protein	0		255.8	Transposase					10.1076	0	8.23671	12.2036	0	0	2.73448	3.0493	1.44594	0.342269	1.04946	0.409778
Methanoperedens_01632	hypothetical protein	0								0	0	65.8937	70.4051	0	0	2.73448	3.0493	1.44594	0.342269	1.04946	0.409778
Methanoperedens_02137	Putative adenylate kise	0	Putative adenylate kise	360.5	Putative adenylate kise	K18532	134.7	9.2e-40	adenylate kise [EC:2.7.4.3]	13.8572	22.5708	54.2029	57.4849	7.16304	11.2305	12.3051	13.6202	11.0797	0.341972	0.697116	0.514004	0.632089
Methanoperedens_00511	hypothetical protein	0		761.9	PS_pyruv_trans domain-containing protein	K16710	201.7	3.7e-60	colanic acid/amylovoran biosynthesis protein	8.63466	15.8222	29.5528	42.1016	9.55072	16.8458	14.356	21.3451	15.5244	0.340604	0.661559	0.506118	0.625468
Methanoperedens_02281	hypothetical protein	0		375.9	Putative transcriptiol regulator with HTH domain	K03718	31	2.5e-08	Lrp/AsnC family transcriptiol regulator, regulator for as, asnC and gidA	4.27437	0	12.5395	20.6428	2.38768	0	3.07629	5.28545	2.68735	0.338991	0.945724	0.485674	0.608058
Methanoperedens_00204	hypothetical protein	0		247.7	Uncharacterized protein					0	0	10.2959	25.8152	0	0	1.70905	4.47231	1.54534	0.336287	1.05078	0.401212
Methanoperedens_03095	hypothetical protein	0		228.4	Uncharacterized protein					14.4395	0	47.0669	34.8673	4.77536	0	6.83619	5.28545	4.22425	0.335093	0.873443	0.521589	0.639477
Methanoperedens_03536	hypothetical protein	0		1004.6	Uncharacterized protein containing a von Willebrand factor type A (VWA) domain	K07114	104.7	1.1e-30	Ca-activated chloride channel homolog	69.14	94.1541	243.103	216.429	152.811	190.919	224.911	204.913	193.388	0.334541	0.259524	0.182097	0.284163
Methanoperedens_01556	hypothetical protein	0		251.5	Uncharacterized protein					0	17.2056	27.5457	47.0906	0	5.61525	4.10171	6.0986	3.95389	0.334116	0.938859	0.430269	0.553593
Methanoperedens_02118	hypothetical protein	0		297	Cupin domain-containing protein	K14673	28.6	1.8e-07	putative monooxygese	0	0	13.427	17.4888	0	0	2.39267	3.25259	1.41131	0.331589	1.04661	0.423364
Methanoperedens_01900	hypothetical protein	0		98.2	Uncharacterized protein					0	0	43.9291	46.9367	0	0	2.73448	2.84601	1.39512	0.330842	1.04602	0.426566
Methanoperedens_02922	Soluble P-type ATPase-like phosphatase	0	Soluble P-type ATPase-like phosphatase	541.2	Soluble P-type ATPase	K17686	74.7	8e-22	P-type Cu+ transporter [EC:7.2.2.8]	9.30486	15.1558	38.4182	35.7194	7.16304	11.2305	12.9888	12.6038	10.9965	0.329812	0.695093	0.528262	0.644871
Methanoperedens_01440	hypothetical protein	0		307.4	Soluble P-type ATPase	K12950	30.8	1.8e-08	manganese/zinc-transporting P-type ATPase C [EC:7.2.2.-]	0	0	17.8375	11.1811	0	0	3.41809	2.23615	1.41356	0.329612	1.04615	0.42528
Methanoperedens_00158	GTPase Era	0	GTPase Era	421	Small GTP-binding protein domain	K03595	82	6.6e-24	GTPase	113.472	128.717	327.604	345.516	66.855	72.9983	84.7687	93.3086	79.4827	0.329377	0.338509	0.303377	0.424021
Methanoperedens_01667	hypothetical protein	0		255.4	Uncharacterized protein					6.31727	30.8689	51.4795	58.6709	2.38768	11.2305	8.54524	10.1643	8.08194	0.329336	0.801858	0.524851	0.641535
Methanoperedens_01297	Cytochrome c-552	4	Cytochrome c-552	875.5	Nitrite reductase (cytochrome; ammonia-forming)	K03385	540.8	7.6e-163	nitrite reductase (cytochrome c-552) [EC:1.7.2.2]	0	0	8.42738	2.95528	0	0	4.44352	1.62629	1.51745	0.328814	1.04832	0.41214
Methanoperedens_01098	hypothetical protein	0	UPF0056 membrane protein MJ0972	342.8	UPF0056 membrane protein	K05595	226.5	8e-68	multiple antibiotic resistance protein	0	9.76318	20.8408	25.9789	0	5.61525	5.46895	4.47231	3.88913	0.328161	0.934766	0.43962	0.563071
Methanoperedens_01352	Vitamin B12 import ATP-binding protein BtuD	0	Uncharacterized ABC transporter ATP-binding protein sll0415	309.3	Uncharacterized protein	K01990	136.4	2.6e-40	ABC-2 type transport system ATP-binding protein	0	0	9.71266	17.5267	0	0	2.05086	3.65916	1.4275	0.32796	1.04638	0.423933
Methanoperedens_02742	hypothetical protein	0	Uncharacterized HTH-type transcriptiol regulator MJ0621	313.9	Putative transcriptiol regulator with an HTH domain	K22300	25.2	3.4e-06	HTH-type transcriptiol regulator, cell division transcriptiol repressor	34.5635	60.3185	144.853	117.396	16.7138	28.0763	30.7629	26.0207	25.3934	0.324682	0.545995	0.48309	0.605089
Methanoperedens_00042	hypothetical protein	0		947.2	Restriction endonuclease	K07448	67.2	3e-19	restriction system protein	1.53694	0	4.00785	7.70804	2.38768	0	2.73448	5.48874	2.65272	0.324575	0.94631	0.500017	0.621369
Methanoperedens_03189	hypothetical protein	0	UPF0200/UPF0201 protein AF_1395	354.4	Dephospho-CoA kise	K00859	35.3	1.4e-09	dephospho-CoA kise [EC:2.7.1.24]	19.0922	0	48.2305	39.8962	9.55072	0	10.5961	9.1479	7.32368	0.323764	0.794144	0.550285	0.664606
Methanoperedens_02625	Threonine synthase	1	Threonine synthase	795	Threonine synthase	K01733	451.2	1.4e-135	threonine synthase [EC:4.2.3.1]	87.6246	83.5456	234.767	251.684	97.8949	89.8441	115.19	126.648	107.394	0.323526	0.300965	0.262634	0.376691
Methanoperedens_00586	hypothetical protein	0		112.1	Uncharacterized protein					29.6258	0	125.539	49.5264	4.77536	0	8.88705	3.65916	4.33039	0.32215	0.89625	0.524037	0.641009
Methanoperedens_01753	hypothetical protein	0		555.8	Abi-like protein					6.13678	0	11.0019	23.9377	4.77536	0	3.7599	8.53804	4.26833	0.321813	0.893564	0.526582	0.643097
[truncated: 2,135 more rows]

## Sheet: S5 - community TPM
		TPM
		Arsenate		Nitrate		METABOLIC-G annotation
Gene_ID	MAG	A1	A2	B1	B2	annotation	Category	Function	Gene.abbreviation	Hmm.file
Acidimicrobiia-1_00007	Acidimicrobiia-1	2.88825	NA	NA	NA	NA	NA	NA	NA	NA
[truncated: 37,361 more rows]

## Sheet: S6 - Arr Arx tree protein seq
Protein sequences (intext figure 2)
>ASW-1~01421
[truncated: 138 more rows]

## Sheet: S7 - Arx_Arr_genesynteny
Leaf ID	Genbank (if applicable)	NCBI Taxonomy	GTDB Taxonomy	ArrA_ID	ArrA_seq	ArxA_ID	ArxA_seq
[truncated: 37 more rows]

[truncated: 1 more sheets: S8 - Arx_Arr_geneclusters]
